# Supplementary material for: The dinucleotide composition of the Zika virus genome is shaped by conflicting evolutionary pressures in mammalian hosts and mosquito vectors
Source: PubMed Central journal article supplement (PMC8084339; doi:10.1371/journal.pbio.3001201), 2021-04-19
Supplement: pbio.3001201.s005.pdf [file pbio.3001201.s005.pdf]

Supplement table 1 – Composition of mutated region

|                 | <i>Total<br/>nt</i> | <i>Freq<br/>G + C</i> | <i>Total<br/>CpG</i> | <i>Ratio<br/>O/E CpG</i> | <i>Total<br/>UpA</i> | <i>Ratio<br/>O/E UpA</i> | <i>CAI<sup>a</sup><br/>Hs</i> | <i>CAI<sup>b</sup><br/>Dm</i> |
|-----------------|---------------------|-----------------------|----------------------|--------------------------|----------------------|--------------------------|-------------------------------|-------------------------------|
| <i>Wildtype</i> | 10727               | 0.51                  | 308                  | 0.45                     | 342                  | 0.54                     | 0.71                          | 0.60                          |
| <i>Wildtype</i> | 1654                | 0.53                  | 55                   | 0.49                     | 57                   | 0.64                     | 0.77                          | 0.64                          |
| <i>SCR</i>      | 1654                | 0.53                  | 55                   | 0.49                     | 49                   | 0.55                     | 0.76                          | 0.65                          |
| <i>CpG_1.0</i>  | 1654                | 0.46                  | 114                  | 1.01                     | 57                   | 0.64                     | 0.70                          | 0.63                          |
| <i>CpG_max</i>  | 1654                | 0.61                  | 245                  | 1.62                     | 57                   | 0.93                     | 0.67                          | 0.71                          |
| <i>UpA_max</i>  | 1654                | 0.53                  | 55                   | 0.68                     | 207                  | 1.71                     | 0.63                          | 0.51                          |

<sup>a</sup> Codon adaptation index (CAI) calculated against the codon usage table of Homo sapiens (Hs)

<sup>b</sup> CAI calculated against the codon usage table of Drosophila melanogaster (Dm)
