# Supplementary material for: The dinucleotide composition of the Zika virus genome is shaped by conflicting evolutionary pressures in mammalian hosts and mosquito vectors
Source: PubMed Central journal article supplement (PMC8084339; doi:10.1371/journal.pbio.3001201), 2021-04-19
Supplement: pbio.3001201.s006.pdf [file pbio.3001201.s006.pdf]

| <i>H. Sapiens</i> | <i>Ae. Aegypti</i> | flaviviruses | ZIKV isolates |
|-------------------|--------------------|--------------|---------------|
| NM_000043.6       | XM_021837896.1     | DQ235145     | KU365778      |
| NM_000061.3       | XM_021838519.1     | AY323490     | KU497555.1    |
| NM_000068.4       | XM_021838576.1     | AF331718     | KU955595.1    |
| NM_000101.4       | XM_021856355.1     | AF253419     | KU955593.1    |
| NM_000116.5       | XM_021837651.1     | NC_001809    | KX247646.1    |
| NM_000117.3       | XR_002502975.1     | DQ235152     | KU744693.1    |
| NM_000148.4       | XM_021848511.1     | DQ235151     | MK241417.1    |
| NM_000151.4       | XR_002502976.1     | DQ235153     | MN100039.1    |
| NM_000184.3       | XR_002501108.1     | AY323489     | KX117076.1    |
| NM_000193.4       | XR_002500046.1     | PWARPT       | MH513600.1    |
| NM_000195.5       | XR_002499437.1     | DQ235149     | KY785466.1    |
| NM_000221.3       | XR_002500378.1     | TEU27495     | KY014320.2    |
| NM_000233.4       | XM_021839360.1     | KU761576     | MK028857.1    |
| NM_000244.3       | XM_021855092.1     | L40361       | KU922960.1    |
| NM_000285.4       | XR_002499655.1     | DQ235144     | KY014319.2    |
| NM_000289.6       | XM_001660351.2     | DQ235150     | KY014300.2    |
| NM_000325.6       | XM_001653904.2     | DQ235148     | KY325476.1    |
| NM_000334.4       | XR_002499247.1     | DQ235146     | KX830930.1    |
| NM_000355.4       | XM_021843798.1     | KF917535     | KU527068      |
| NM_000360.4       | XM_021841335.1     | AY632536     |               |
| NM_000380.4       | XM_021839798.1     | AY632538     |               |
| NM_000420.3       | XR_002500965.1     | KF917538     |               |
| NM_000442.5       | XM_001649659.2     | DVU88536     |               |
| NM_000455.5       | XM_001653108.2     | DENRCG       |               |
| NM_000463.3       | XR_002498938.1     | DENCME       |               |
| NM_000486.6       | XM_001651609.2     | AF326573     |               |
| NM_000487.6       | XM_001652798.2     | LN849009     |               |
| NM_000514.4       | XM_001649658.2     | JEVCG        |               |
| NM_000531.6       | XR_002500826.1     | EU082200     |               |
| NM_000603.5       | XR_002500705.1     | AY898809     |               |
| NM_000661.5       | XR_002500569.1     | AF161266     |               |
| NM_000666.3       | XR_002501273.1     | DQ525916     |               |
| NM_000679.4       | XR_002500752.1     | AY453411     |               |
| NM_000700.3       | XR_002499843.1     | KUNCG        |               |
| NM_000705.4       | XM_021853272.1     | WNFCG        |               |
| NM_000717.5       | XM_021847017.1     | EU082199     |               |
| NM_000723.5       | XM_021839613.1     | NC_009029    |               |
| NM_000742.4       | XM_021846941.1     | MF380434     |               |
| NM_000748.3       | XR_002500629.1     | NC_009028    |               |
| NM_000784.4       | XM_001661645.2     | MF461639     |               |
| NM_000794.5       | XR_002501303.1     | KC734552     |               |
| NM_000808.4       | XM_021857092.1     | NC_018705    |               |
| NM_000809.4       | XM_001650132.2     | KF192951     |               |
| NM_000842.5       | XR_002499034.1     | DQ859059     |               |
| NM_000845.3       | XR_002500400.1     | DQ859063     |               |
| NM_000848.4       | XM_001659562.2     | DQ859058     |               |
| NM_000862.3       | XM_021844096.1     | X03700       |               |
| NM_000869.6       | XM_021854409.1     | NC_008718    |               |
| NM_000882.4       | XM_021839364.1     | NC_026624    |               |

|                |                |           |
|----------------|----------------|-----------|
| NM_000896.3    | XM_021857090.1 | NC_005039 |
| NM_000911.4    | XM_021847667.1 | AF160193  |
| NM_000932.5    | XM_021856647.1 | NC_026620 |
| NM_000936.4    | XM_021839537.1 | AJ242984  |
| NM_000952.5    | XM_021850851.1 | AJ299445  |
| NM_000954.6    | XM_001656983.2 | KJ469370  |
| NM_000961.4    | XM_021856340.1 | NC_034007 |
| NM_001001.5    | XM_021837967.1 | AF144692  |
| NM_001001349.2 | XM_021856059.1 | NC_005064 |
| NM_001001437.4 | XR_002499502.1 | JQ268258  |
| NM_001001479.4 | XR_002499293.1 | NC_024299 |
| NM_001001547.3 | XM_021850832.1 | NC_027817 |
| NM_001001563.5 | XR_002502609.1 | NC_001564 |
| NM_001001580.2 | XM_021856422.1 | GQ165809  |
| NM_001001694.3 | XR_002499302.1 | NC_012932 |
| NM_001001715.4 | XM_021850829.1 | KC505248  |
| NM_001001722.2 | XR_002499606.1 | NC_012671 |
| NM_001001913.2 | XM_021842531.1 | HE574574  |
| NM_001001918.1 | XR_002502037.1 | NC_008604 |
| NM_001001952.1 | XR_002499177.1 | KX669689  |
| NM_001001957.2 | XM_021839538.1 | DQ400858  |
| NM_001001958.1 | XR_002503231.1 | NC_033694 |
| NM_001001965.1 | XM_001649656.2 | NC_024017 |
| NM_001001991.3 | XM_021856243.1 | MF139576  |
| NM_001002006.3 | XR_002500221.1 | NC_017086 |
| NM_001002249.2 | XR_002500915.1 | NC_016997 |
| NM_001002251.3 | XM_021849176.1 | KC692068  |
| NM_001002261.4 | XM_001652840.2 | KC496020  |
| NM_001002262.4 | XM_021842437.1 | MF139575  |
| NM_001002294.3 | XR_002500263.1 | NC_024805 |
| NM_001002814.3 | XM_001653251.2 | EU159426  |
| NM_001002879.1 | XR_002502942.1 | MG587038  |
| NM_001002914.3 | XR_002499522.1 | MH158418  |
| NM_001003443.3 | XM_021838320.1 | MH158417  |
| NM_001003745.2 | XR_002502671.1 | MH158416  |
| NM_001003760.5 | XM_021842955.1 | MH158415  |
| NM_001003789.3 | XR_002500597.1 |           |
| NM_001003845.3 | XM_001655319.2 |           |
| NM_001003897.2 | XR_002498878.1 |           |
| NM_001003937.3 | XR_002501094.1 |           |
| NM_001003941.3 | XM_001649647.2 |           |
| NM_001004.4    | XR_002500515.1 |           |
| NM_001004056.2 | XR_002502072.1 |           |
| NM_001004135.2 | XM_021843923.1 |           |
| NM_001004298.4 | XR_002500009.1 |           |
| NM_001004416.3 | XM_021848799.1 |           |
| NM_001004463.2 | XR_002500395.1 |           |
| NM_001004705.2 | XR_002499348.1 |           |
| NM_001004723.3 | XR_002500819.1 |           |
| NM_001004732.2 | XR_002500043.1 |           |

NM\_001004738.2 XM\_021854178.1  
NM\_001004750.1 XR\_002502353.1  
NM\_001004752.2 XR\_002502492.1  
NM\_001004757.2 XM\_021839628.1  
NM\_001005160.3 XR\_002500971.1  
NM\_001005163.2 XM\_021843332.1  
NM\_001005165.2 XM\_001649672.2  
NM\_001005166.5 XM\_021844475.1  
NM\_001005172.2 XM\_001653220.2  
NM\_001005198.2 XM\_001656328.2  
NM\_001005241.4 XM\_021842532.1  
NM\_001005279.3 XR\_002503024.1  
NM\_001005284.1 XM\_021842460.1  
NM\_001005289.5 XR\_002499049.1  
NM\_001005369.1 XM\_021841437.1  
NM\_001005404.4 XM\_021844264.1  
NM\_001005416.2 XM\_021851628.1  
NM\_001005466.2 XR\_002500997.1  
NM\_001005473.3 XM\_021842795.1  
NM\_001005489.2 XR\_002499861.1  
NM\_001005527.3 XR\_002502233.1  
NM\_001005781.2 XM\_021852829.1  
NM\_001005853.1 XM\_001661458.2  
NM\_001006109.1 XM\_021855606.1  
NM\_001006946.2 XM\_001656229.2  
NM\_001007025.2 XM\_021850900.1  
NM\_001007089.4 XM\_021844310.1  
NM\_001007226.1 XR\_002499834.1  
NM\_001007234.3 XR\_002498801.1  
NM\_001007464.3 XR\_002500163.1  
NM\_001007530.3 XR\_002502932.1  
NM\_001007537.2 XR\_002502345.1  
NM\_001007559.3 XM\_001660308.2  
NM\_001008215.3 XM\_001658818.2  
NM\_001008273.2 XM\_001649665.2  
NM\_001008387.3 XM\_021852850.1  
NM\_001008740.4 XM\_021843268.1  
NM\_001008781.3 XM\_001662067.2  
NM\_001009566.3 XR\_002498673.1  
NM\_001009584.2 XM\_021846071.1  
NM\_001009614.3 XM\_001647908.2  
NM\_001009992.1 XM\_001652936.2  
NM\_001010000.3 XR\_002501908.1  
NM\_001010844.4 XM\_021844314.1  
NM\_001010866.4 XM\_001661544.2  
NM\_001010877.5 XM\_021838751.1  
NM\_001011.4 XM\_021850874.1  
NM\_001011658.4 XM\_001659574.2  
NM\_001011709.3 XM\_021857311.1  
NM\_001012455.2 XM\_021848696.1

NM\_001012727.2 XM\_021851496.1  
NM\_001012763.2 XM\_021844347.1  
NM\_001013253.2 XR\_002498816.1  
NM\_001013438.3 XR\_002502089.1  
NM\_001013630.2 XM\_011494961.2  
NM\_001013690.5 XM\_021857312.1  
NM\_001013699.3 XM\_001659603.2  
NM\_001013837.2 XM\_021842468.1  
NM\_001014283.2 XM\_021853495.1  
NM\_001014336.2 XM\_001658477.2  
NM\_001014342.3 XM\_021852378.1  
NM\_001014435.2 XR\_002501980.1  
NM\_001014447.3 XM\_021837982.1  
NM\_001014999.3 XM\_021850754.1  
NM\_001015.5 XM\_021849319.1  
NM\_001015049.3 XR\_002500809.1  
NM\_001015050.3 XM\_021848995.1  
NM\_001015072.4 XM\_021856296.1  
NM\_001017395.5 XM\_001651099.2  
NM\_001017416.2 XM\_021844340.1  
NM\_001017926.3 XM\_021844346.1  
NM\_001017970.3 XR\_002500570.1  
NM\_001018100.5 XM\_021847572.1  
NM\_001018136.3 XR\_002501642.1  
NM\_001018160.2 XM\_021842896.1  
NM\_001018161.2 XM\_021853485.1  
NM\_001019.5 XM\_021850768.1  
NM\_001020821.2 XM\_021844306.1  
NM\_001024074.3 XM\_001651095.2  
NM\_001024381.2 XM\_021855457.1  
NM\_001024383.2 XR\_002499044.1  
NM\_001024593.2 XM\_021842264.1  
NM\_001024601.3 XM\_021841334.1  
NM\_001024628.3 XM\_021844313.1  
NM\_001024662.3 XR\_002503129.1  
NM\_001024855.3 XR\_002503136.1  
NM\_001024924.2 XM\_021844246.1  
NM\_001025076.2 XR\_002500336.1  
NM\_001025081.2 XM\_021853642.1  
NM\_001025107.3 XM\_021839614.1  
NM\_001025160.3 XM\_021850164.1  
NM\_001025238.2 XR\_002502762.1  
NM\_001029875.3 XM\_001659747.3  
NM\_001029891.3 XR\_002499399.1  
NM\_001029955.4 XM\_021839505.1  
NM\_001031698.3 XM\_021841432.1  
NM\_001031713.3 XR\_002501504.1  
NM\_001031735.3 XM\_021849007.1  
NM\_001031835.3 XM\_021857462.1  
NM\_001032.5 XM\_001657977.2

NM\_001033117.3 XM\_001660597.2  
NM\_001033602.4 XM\_001654891.2  
NM\_001033855.3 XR\_002502700.1  
NM\_001034172.4 XM\_021837394.1  
NM\_001034957.3 XM\_001651695.2  
NM\_001035003.2 XR\_002498611.1  
NM\_001037132.4 XM\_021846196.1  
NM\_001037165.2 XR\_002499975.1  
NM\_001037232.4 XR\_002500384.1  
NM\_001037330.3 XM\_021842231.1  
NM\_001037331.3 XM\_021844343.1  
NM\_001037442.4 XR\_002500401.1  
NM\_001037499.2 XR\_002499402.1  
NM\_001037553.2 XM\_021844365.1  
NM\_001037582.3 XR\_002498598.1  
NM\_001037671.4 XM\_001654389.2  
NM\_001038707.2 XM\_021847927.1  
NM\_001039130.2 XR\_002501977.1  
NM\_001039211.3 XM\_021839673.1  
NM\_001039213.4 XR\_002500499.1  
NM\_001039348.3 XM\_021854226.1  
NM\_001039374.5 XR\_002500473.1  
NM\_001039656.1 XM\_021855298.1  
NM\_001039664.2 XR\_002499666.1  
NM\_001039780.4 XM\_001662134.2  
NM\_001040025.3 XR\_002501421.1  
NM\_001040105.2 XR\_002500397.1  
NM\_001040107.2 XR\_002499170.1  
NM\_001040110.2 XM\_001659590.2  
NM\_001040126.2 XM\_021848608.1  
NM\_001040272.6 XR\_002498935.1  
NM\_001040284.3 XR\_002502283.1  
NM\_001040443.3 XM\_021837869.1  
NM\_001040647.2 XM\_021839369.1  
NM\_001042351.3 XM\_021844624.1  
NM\_001042361.5 XM\_001649652.2  
NM\_001042370.2 XR\_002501342.1  
NM\_001042422.3 XR\_002499384.1  
NM\_001042423.3 XM\_001651978.2  
NM\_001042428.2 XM\_021856855.1  
NM\_001042442.3 XM\_001661646.2  
NM\_001042450.4 XR\_002499112.1  
NM\_001042459.3 XR\_002499931.1  
NM\_001042469.3 XM\_021844219.1  
NM\_001042574.3 XR\_002501535.1  
NM\_001042616.3 XR\_002498794.1  
NM\_001042705.3 XM\_021844363.1  
NM\_001043353.2 XM\_021848994.1  
NM\_001045477.4 XR\_002498918.1  
NM\_001063.4 XM\_001660307.2

NM\_001076683.2 XM\_021843025.1  
NM\_001077.4 XM\_021848999.1  
NM\_001077188.2 XM\_021851716.1  
NM\_001077194.2 XR\_002498936.1  
NM\_001077471.3 XM\_021839357.1  
NM\_001077477.3 XR\_002502028.1  
NM\_001077480.3 XM\_001655174.2  
NM\_001077526.3 XM\_021844469.1  
NM\_001077619.2 XM\_021844368.1  
NM\_001077653.2 XM\_001652515.2  
NM\_001077664.3 XM\_021837887.1  
NM\_001078170.2 XR\_002501641.1  
NM\_001079817.3 XM\_001648290.2  
NM\_001079882.2 XM\_001652439.1  
NM\_001080121.3 XR\_002501234.1  
NM\_001080446.3 XM\_021854213.1  
NM\_001080482.4 XR\_002499813.1  
NM\_001080503.3 XM\_001650651.2  
NM\_001080534.3 XR\_002502882.1  
NM\_001080744.2 XM\_001650627.2  
NM\_001080998.2 XM\_001658763.2  
NM\_001081492.2 XM\_021848027.1  
NM\_001081573.3 XM\_001660306.2  
NM\_001081675.3 XM\_021844356.1  
NM\_001083592.2 XM\_021851489.1  
NM\_001083600.3 XM\_021856403.1  
NM\_001083956.2 XM\_021844736.1  
NM\_001085426.3 XM\_021850730.1  
NM\_001093729.2 XM\_021853349.1  
NM\_001097605.2 XR\_002500998.1  
NM\_001098212.2 XR\_002501864.1  
NM\_001098405.2 XM\_021837888.1  
NM\_001098412.2 XM\_021839564.1  
NM\_001098418.2 XM\_021844309.1  
NM\_001098504.2 XM\_021843047.1  
NM\_001098519.2 XM\_021853610.1  
NM\_001098525.3 XR\_002501503.1  
NM\_001098535.1 XR\_002502990.1  
NM\_001098670.2 XR\_002501749.1  
NM\_001098818.4 XR\_002501620.1  
NM\_001099403.2 XR\_002501587.1  
NM\_001099650.2 XM\_001660303.2  
NM\_001099669.2 XM\_001655670.2  
NM\_001099670.3 XM\_021856701.1  
NM\_001099681.2 XR\_002498829.1  
NM\_001099733.2 XR\_002499945.1  
NM\_001099735.2 XM\_001654902.2  
NM\_001099746.2 XM\_011494663.2  
NM\_001099783.2 XM\_021853577.1  
NM\_001099857.5 XM\_021837745.1

NM\_001100407.3 XM\_001659051.2  
NM\_001100411.3 XM\_021844233.1  
NM\_001100620.3 XM\_001649537.2  
NM\_001100621.3 XR\_002501422.1  
NM\_001100625.3 XM\_021844241.1  
NM\_001101311.2 XM\_001661485.2  
NM\_001101362.3 XM\_021838675.1  
NM\_001102470.2 XM\_001660722.2  
NM\_001102559.2 XM\_001654006.2  
NM\_001102562.3 XM\_021851408.1  
NM\_001105.5 XR\_002500135.1  
NM\_001105207.3 XR\_002499366.1  
NM\_001105513.3 XM\_021847919.1  
NM\_001105518.2 XM\_021844852.1  
NM\_001105558.1 XR\_002500772.1  
NM\_001105563.2 XM\_001654652.2  
NM\_001105569.3 XM\_001655668.2  
NM\_001105573.2 XR\_002501293.1  
NM\_001109754.4 XM\_021845365.1  
NM\_001110354.2 XM\_021855447.1  
NM\_001111035.3 XR\_002498847.1  
NM\_001111307.2 XM\_001661984.2  
NM\_001111309.1 XM\_001648207.2  
NM\_001113324.3 XM\_021845366.1  
NM\_001113348.2 XR\_002502445.1  
NM\_001113511.2 XM\_021851409.1  
NM\_001113525.2 XM\_021855190.1  
NM\_001113535.2 XM\_011494756.2  
NM\_001113546.2 XM\_021837396.1  
NM\_001114086.2 XM\_021839356.1  
NM\_001114092.2 XR\_002499894.1  
NM\_001114182.3 XM\_021839954.1  
NM\_001114377.2 XM\_021849169.1  
NM\_001114759.3 XM\_021853335.1  
NM\_001117.5 XM\_001660301.2  
NM\_001122630.2 XR\_002501618.1  
NM\_001122679.2 XM\_021841219.1  
NM\_001122825.2 XR\_002502799.1  
NM\_001122847.3 XR\_002500899.1  
NM\_001122853.3 XM\_021856183.1  
NM\_001122898.3 XM\_021849333.1  
NM\_001123366.2 XM\_021849097.1  
NM\_001123377.2 XM\_021851594.1  
NM\_001126129.2 XM\_021855455.1  
NM\_001126339.3 XM\_001654900.2  
NM\_001127223.1 XM\_001662456.2  
NM\_001127255.1 XR\_002499500.1  
NM\_001127361.3 XM\_021855286.1  
NM\_001127362.2 XM\_021857197.1  
NM\_001127392.3 XM\_001660623.2

NM\_001127493.3 XR\_002501976.1  
NM\_001127585.2 XM\_001663928.2  
NM\_001127644.2 XM\_001656568.2  
NM\_001127670.4 XM\_021844167.1  
NM\_001127698.2 XM\_001651203.2  
NM\_001127700.2 XM\_001657679.2  
NM\_001127895.2 XM\_021856850.1  
NM\_001128310.3 XM\_021851424.1  
NM\_001128612.2 XM\_001652656.2  
NM\_001128631.3 XM\_001649339.2  
NM\_001128633.2 XR\_002503107.1  
NM\_001128635.1 XM\_021844753.1  
NM\_001128847.4 XM\_021856122.1  
NM\_001128852.2 XR\_002502691.1  
NM\_001128932.2 XM\_021849171.1  
NM\_001129729.3 XM\_021850780.1  
NM\_001129830.3 XR\_002501746.1  
NM\_001129834.2 XR\_002502713.1  
NM\_001129837.2 XR\_002500879.1  
NM\_001130066.2 XM\_001663845.2  
NM\_001130087.2 XM\_021843046.1  
NM\_001130091.2 XM\_001654004.2  
NM\_001130410.2 XM\_021837649.1  
NM\_001130455.2 XM\_021855580.1  
NM\_001130514.3 XM\_001650449.2  
NM\_001130831.2 XM\_021850537.1  
NM\_001130861.1 XM\_021838725.1  
NM\_001130864.2 XM\_021843888.1  
NM\_001130957.2 XM\_021847795.1  
NM\_001130964.2 XM\_021847666.1  
NM\_001131009.2 XM\_011494845.2  
NM\_001134296.2 XR\_002502881.1  
NM\_001134373.3 XR\_002502471.1  
NM\_001134432.2 XR\_002499370.1  
NM\_001134451.2 XR\_002499583.1  
NM\_001134649.3 XR\_002501238.1  
NM\_001134672.2 XR\_002499730.1  
NM\_001134673.4 XM\_021840542.1  
NM\_001134759.2 XM\_021839373.1  
NM\_001134771.2 XR\_002502651.1  
NM\_001134774.2 XM\_021851738.1  
NM\_001135054.2 XM\_021855291.1  
NM\_001135191.2 XM\_001655010.2  
NM\_001135599.4 XM\_021844133.1  
NM\_001135664.2 XM\_001650203.2  
NM\_001135669.2 XM\_021842667.1  
NM\_001135671.3 XM\_021852016.1  
NM\_001135675.2 XM\_021839525.1  
NM\_001135697.3 XM\_001653180.2  
NM\_001135701.2 XM\_021851066.1



NM\_001135707.3 XM\_021843082.1  
NM\_001135955.3 XR\_002500073.1  
NM\_001135998.3 XM\_021848386.1  
NM\_001135999.1 XM\_021842130.1  
NM\_001136020.3 XM\_021854203.1  
NM\_001136109.3 XM\_001650025.2  
NM\_001136130.3 XM\_021855773.1  
NM\_001136214.3 XM\_001659702.2  
NM\_001136263.2 XM\_001655178.2  
NM\_001136493.3 XR\_002500273.1  
NM\_001136497.3 XM\_021844159.1  
NM\_001136534.3 XM\_021845707.1  
NM\_001136558.2 XM\_021840544.1  
NM\_001136575.2 XM\_021853620.1  
NM\_001137675.4 XM\_021837676.1  
NM\_001139459.2 XM\_021852244.1  
NM\_001139518.1 XR\_002500600.1  
NM\_001142310.2 XR\_002498881.1  
NM\_001142370.2 XM\_021842137.1  
NM\_001142434.2 XM\_001651303.2  
NM\_001142463.3 XM\_001660714.2  
NM\_001142473.2 XM\_021851011.1  
NM\_001142536.2 XM\_021840603.1  
NM\_001142540.2 XM\_001660213.2  
NM\_001142545.2 XM\_011494649.2  
NM\_001142550.2 XM\_021856473.1  
NM\_001142576.2 XR\_002499485.1  
NM\_001142625.2 XM\_021855770.1  
NM\_001142643.3 XM\_021847664.1  
NM\_001142673.3 XM\_021856987.1  
NM\_001142678.2 XM\_021853575.1  
NM\_001142799.3 XM\_021851607.1  
NM\_001142800.2 XM\_021845066.1  
NM\_001142935.2 XM\_021840541.1  
NM\_001142961.1 XM\_001654459.3  
NM\_001143773.1 XR\_002500728.1  
NM\_001143788.2 XR\_002498927.1  
NM\_001143812.2 XR\_002501772.1  
NM\_001143823.3 XM\_021855836.1  
NM\_001143942.2 XM\_001655657.2  
NM\_001144012.3 XR\_002502915.1  
NM\_001144060.2 XR\_002500851.1  
NM\_001144831.2 XM\_001660202.2  
NM\_001144875.2 XR\_002498767.1  
NM\_001144879.2 XM\_001660604.2  
NM\_001144903.3 XM\_021852964.1  
NM\_001144916.2 XM\_021838257.1  
NM\_001144920.3 XM\_001655303.2  
NM\_001144924.2 XM\_021848578.1  
NM\_001144984.3 XR\_002499555.1

NM\_001145059.2 XR\_002499734.1  
NM\_001145102.2 XM\_021839876.1  
NM\_001145104.2 XM\_021844095.1  
NM\_001145118.1 XR\_002501686.1  
NM\_001145124.1 XM\_021854208.1  
NM\_001145144.2 XM\_021842582.1  
NM\_001145146.2 XM\_021839543.1  
NM\_001145345.1 XM\_001663374.2  
NM\_001145445.1 XM\_021841635.1  
NM\_001145475.3 XM\_001651495.2  
NM\_001145548.2 XM\_001663015.2  
NM\_001145640.2 XR\_002501458.1  
NM\_001145650.2 XM\_001658827.2  
NM\_001145659.1 XR\_002501262.1  
NM\_001145668.2 XM\_001657903.2  
NM\_001145713.2 XM\_001660414.2  
NM\_001145717.1 XR\_002499433.1  
NM\_001145734.2 XM\_021855626.1  
NM\_001145829.2 XM\_021846359.1  
NM\_001145928.2 XR\_002500618.1  
NM\_001146055.2 XM\_001656485.3  
NM\_001146158.2 XR\_002501440.1  
NM\_001146171.2 XM\_021847573.1  
NM\_001146191.2 XR\_002502754.1  
NM\_001146333.3 XM\_021848953.1  
NM\_001146339.2 XM\_021849088.1  
NM\_001146683.2 XR\_002500632.1  
NM\_001146686.3 XR\_002503020.1  
NM\_001148.6 XM\_021845608.1  
NM\_001159286.2 XR\_002502650.1  
NM\_001159322.2 XM\_021855628.1  
NM\_001159379.2 XM\_021839670.1  
NM\_001159554.1 XM\_021850915.1  
NM\_001159601.2 XM\_021847038.1  
NM\_001159740.2 XM\_001660730.2  
NM\_001159773.2 XR\_002503181.1  
NM\_001160002.2 XM\_011495066.2  
NM\_001160116.2 XM\_021849087.1  
NM\_001160125.2 XM\_001657764.2  
NM\_001160166.2 XR\_002499642.1  
NM\_001160176.4 XM\_021852576.1  
NM\_001160224.2 XM\_001659180.1  
NM\_001160244.2 XR\_002502949.1  
NM\_001160300.2 XM\_021846536.1  
NM\_001160302.1 XM\_021849405.1  
NM\_001161330.2 XM\_021854866.1  
NM\_001161368.3 XM\_021852995.1  
NM\_001161454.1 XM\_001652365.2  
NM\_001161527.2 XM\_021849170.1  
NM\_001161562.3 XM\_001649750.2

NM\_001161584.2 XM\_021845159.1  
NM\_001161662.2 XM\_021856425.1  
NM\_001162407.1 XM\_021853208.1  
NM\_001162862.2 XM\_001652313.2  
NM\_001162936.2 XR\_002498855.1  
NM\_001163335.2 XM\_021841531.1  
NM\_001163484.2 XM\_001661348.3  
NM\_001163560.3 XM\_021845131.1  
NM\_001163735.2 XM\_021856683.1  
NM\_001164161.2 XM\_021844171.1  
NM\_001164283.3 XM\_001661007.2  
NM\_001164319.2 XM\_021857597.1  
NM\_001164381.2 XM\_021848580.1  
NM\_001164399.2 XM\_021843277.1  
NM\_001164442.2 XM\_001661784.2  
NM\_001164538.2 XR\_002501499.1  
NM\_001164542.2 XR\_002503273.1  
NM\_001164619.2 XR\_002503071.1  
NM\_001164638.3 XM\_021843979.1  
NM\_001164690.2 XM\_021837968.1  
NM\_001164694.2 XR\_002502498.1  
NM\_001164738.1 XM\_021848396.1  
NM\_001164752.2 XR\_002499278.1  
NM\_001164778.2 XR\_002498804.1  
NM\_001164781.2 XM\_021849025.1  
NM\_001164831.3 XM\_021844116.1  
NM\_001164835.2 XM\_021852697.1  
NM\_001165255.2 XM\_021856590.1  
NM\_001165412.2 XM\_021837995.1  
NM\_001165885.2 XM\_021847325.1  
NM\_001165928.3 XM\_001663026.2  
NM\_001165945.2 XM\_001649671.2  
NM\_001166208.2 XM\_011495224.2  
NM\_001166280.2 XM\_021843763.1  
NM\_001166287.2 XM\_001648972.2  
NM\_001166387.4 XM\_021853336.1  
NM\_001166393.2 XM\_021850949.1  
NM\_001166533.2 XM\_021839541.1  
NM\_001166703.2 XM\_001661166.2  
NM\_001166704.2 XM\_021850960.1  
NM\_001167605.2 XR\_002502270.1  
NM\_001167608.3 XM\_001663498.2  
NM\_001167890.2 XM\_021841326.1  
NM\_001167915.3 XR\_002500373.1  
NM\_001168323.2 XM\_001652071.2  
NM\_001168390.2 XM\_021850955.1  
NM\_001170330.1 XR\_002503092.1  
NM\_001170423.2 XM\_001659755.2  
NM\_001170670.2 XM\_021844190.1  
NM\_001170687.4 XM\_021843079.1

NM\_001170741.3 XM\_021844324.1  
NM\_001170760.2 XM\_001648225.2  
NM\_001170881.2 XM\_021857502.1  
NM\_001171025.2 XM\_001650968.2  
NM\_001171653.2 XR\_002501970.1  
NM\_001171743.3 XR\_002502948.1  
NM\_001171934.1 XR\_002501813.1  
NM\_001172568.2 XM\_021850749.1  
NM\_001172640.2 XM\_021851897.1  
NM\_001172671.2 XM\_021850115.1  
NM\_001172771.2 XM\_021845376.1  
NM\_001172772.2 XM\_021855629.1  
NM\_001172815.3 XM\_001651216.2  
NM\_001172818.1 XM\_001658820.2  
NM\_001173129.2 XM\_021847574.1  
NM\_001174070.3 XM\_021848671.1  
NM\_001174085.2 XM\_021854864.1  
NM\_001174104.2 XM\_001661747.2  
NM\_001174105.2 XR\_002502454.1  
NM\_001174127.2 XM\_021842675.1  
NM\_001174166.2 XR\_002500097.1  
NM\_001177310.2 XM\_021844712.1  
NM\_001177704.3 XM\_001664182.2  
NM\_001177800.2 XR\_002500196.1  
NM\_001177801.2 XR\_002503135.1  
NM\_001177998.2 XM\_001656650.2  
NM\_001178030.2 XM\_021857081.1  
NM\_001178094.2 XM\_021849163.1  
NM\_001178106.1 XR\_002503255.1  
NM\_001178140.2 XR\_002500520.1  
NM\_001184693.2 XM\_001655691.2  
NM\_001184696.1 XR\_002502340.1  
NM\_001184721.2 XM\_001655646.2  
NM\_001184751.2 XM\_001661338.2  
NM\_001184760.2 XR\_002500561.1  
NM\_001184792.2 XR\_002501955.1  
NM\_001184866.2 XM\_021853605.1  
NM\_001184872.2 XM\_021843602.1  
NM\_001184903.1 XM\_001662189.3  
NM\_001184970.3 XM\_001660967.2  
NM\_001184974.2 XM\_021857066.1  
NM\_001184993.2 XM\_001658441.2  
NM\_001185054.2 XM\_021850172.1  
NM\_001185119.1 XM\_021844521.1  
NM\_001185149.1 XR\_002500902.1  
NM\_001190158.1 XR\_002500194.1  
NM\_001190447.2 XM\_021839739.1  
NM\_001190462.2 XM\_021846542.1  
NM\_001190482.2 XM\_021848401.1  
NM\_001190789.2 XM\_001663679.2

NM\_001190791.2 XM\_021855299.1  
NM\_001190801.2 XM\_021843729.1  
NM\_001190811.2 XM\_021856205.1  
NM\_001190848.2 XM\_021857546.1  
NM\_001190882.3 XM\_001651206.2  
NM\_001190983.2 XM\_021839639.1  
NM\_001191029.2 XR\_002503257.1  
NM\_001191037.2 XM\_001657417.2  
NM\_001191059.4 XR\_002501586.1  
NM\_001193272.2 XR\_002503021.1  
NM\_001193360.2 XM\_021840501.1  
NM\_001193461.2 XM\_021856559.1  
NM\_001193487.3 XM\_021845705.1  
NM\_001193503.2 XM\_021840487.1  
NM\_001193557.2 XM\_001656559.2  
NM\_001194958.2 XR\_002501801.1  
NM\_001195035.2 XM\_021846137.1  
NM\_001195076.2 XR\_002501597.1  
NM\_001195104.3 XM\_021856937.1  
NM\_001195203.4 XM\_021854860.1  
NM\_001195249.2 XM\_021844090.1  
NM\_001195296.2 XM\_021847596.1  
NM\_001195303.3 XR\_002501581.1  
NM\_001195307.2 XM\_021852226.1  
NM\_001195578.2 XR\_002498810.1  
NM\_001195803.2 XM\_021838741.1  
NM\_001198541.3 XM\_021845943.1  
NM\_001198621.4 XR\_002501889.1  
NM\_001198689.2 XM\_021842372.1  
NM\_001198756.1 XM\_001654990.2  
NM\_001198855.1 XM\_001661988.2  
NM\_001198898.2 XM\_021843294.1  
NM\_001198909.2 XM\_001648723.2  
NM\_001199041.2 XM\_021837694.1  
NM\_001199042.2 XM\_001662155.2  
NM\_001199081.3 XM\_001660041.2  
NM\_001199135.3 XM\_021837678.1  
NM\_001199148.1 XM\_021840612.1  
NM\_001199255.3 XM\_001660277.2  
NM\_001199262.3 XR\_002500072.1  
NM\_001199379.2 XM\_021845792.1  
NM\_001199388.3 XM\_001657239.3  
NM\_001199427.2 XR\_002503133.1  
NM\_001199463.2 XM\_021850453.1  
NM\_001199570.2 XM\_011495347.2  
NM\_001199636.2 XM\_021852727.1  
NM\_001199637.2 XM\_021843291.1  
NM\_001199642.1 XM\_021845023.1  
NM\_001199661.1 XR\_002500803.1  
NM\_001199708.2 XM\_001660760.2

NM\_001199752.3 XR\_002498798.1  
NM\_001199771.3 XM\_021852381.1  
NM\_001199805.1 XM\_021846144.1  
NM\_001199837.3 XM\_021847389.1  
NM\_001199851.1 XM\_001653669.2  
NM\_001199859.3 XM\_021843293.1  
NM\_001199876.1 XM\_001657906.2  
NM\_001199987.2 XM\_001655635.2  
NM\_001200051.2 XR\_002501799.1  
NM\_001201365.2 XM\_021848395.1  
NM\_001201473.2 XR\_002501064.1  
NM\_001201480.2 XM\_001663652.2  
NM\_001202409.2 XM\_021856348.1  
NM\_001202410.2 XM\_021857637.1  
NM\_001202498.2 XM\_021845008.1  
NM\_001202555.2 XM\_001657908.2  
NM\_001203261.2 XM\_021843286.1  
NM\_001204066.2 XM\_001658890.2  
NM\_001204078.2 XM\_021853959.1  
NM\_001204145.3 XR\_002498591.1  
NM\_001204148.3 XM\_021845693.1  
NM\_001204175.2 XM\_021848676.1  
NM\_001204190.2 XM\_001650008.2  
NM\_001204212.2 XM\_021840237.1  
NM\_001204221.2 XM\_021844087.1  
NM\_001204290.2 XM\_021847088.1  
NM\_001204293.2 XM\_021847395.1  
NM\_001204408.2 XM\_001654903.2  
NM\_001204505.3 XM\_021847672.1  
NM\_001204514.2 XM\_001661499.2  
NM\_001204698.2 XM\_021840503.1  
NM\_001204803.2 XM\_021843987.1  
NM\_001204887.2 XM\_021844500.1  
NM\_001205301.2 XM\_001652627.2  
NM\_001206482.2 XR\_002501432.1  
NM\_001206488.3 XM\_001650755.2  
NM\_001206627.2 XR\_002500560.1  
NM\_001206671.4 XM\_021853006.1  
NM\_001206924.2 XR\_002500807.1  
NM\_001206994.2 XM\_001651466.2  
NM\_001207037.2 XR\_002499852.1  
NM\_001207042.3 XM\_021849174.1  
NM\_001207051.2 XM\_001657418.2  
NM\_001207053.2 XM\_001652760.2  
NM\_001214907.1 XM\_001658243.3  
NM\_001226.4 XM\_021848786.1  
NM\_001228.4 XM\_021857248.1  
NM\_001235.5 XM\_021843728.1  
NM\_001242375.1 XM\_021856224.1  
NM\_001242376.3 XM\_021845689.1

NM\_001242399.2 XM\_021853873.1  
NM\_001242560.2 XR\_002498978.1  
NM\_001242589.3 XM\_001647950.2  
NM\_001242597.2 XM\_021851961.1  
NM\_001242598.2 XM\_021847323.1  
NM\_001242630.2 XM\_001653229.2  
NM\_001242639.2 XM\_021855068.1  
NM\_001242692.2 XM\_021856681.1  
NM\_001242763.2 XM\_001652384.2  
NM\_001242798.2 XM\_021851567.1  
NM\_001242818.2 XM\_021845075.1  
NM\_001242820.2 XM\_021845789.1  
NM\_001242847.2 XM\_021841454.1  
NM\_001242848.2 XM\_001649759.2  
NM\_001242851.1 XR\_002502780.1  
NM\_001242858.3 XR\_002500034.1  
NM\_001242868.2 XR\_002498946.1  
NM\_001242875.3 XM\_021849999.1  
NM\_001243042.1 XM\_021843324.1  
NM\_001243108.2 XR\_002500096.1  
NM\_001243116.2 XM\_001655235.2  
NM\_001243137.2 XM\_021851745.1  
NM\_001243177.4 XM\_021848500.1  
NM\_001243237.2 XM\_001660369.2  
NM\_001243256.2 XM\_001648309.2  
NM\_001243271.2 XR\_002502328.1  
NM\_001243423.2 XM\_021840502.1  
NM\_001243597.2 XM\_021845448.1  
NM\_001243754.2 XM\_021855103.1  
NM\_001243782.2 XM\_021853044.1  
NM\_001243784.2 XM\_021842664.1  
NM\_001243798.2 XM\_021843415.1  
NM\_001243799.1 XM\_021847262.1  
NM\_001243925.2 XM\_021853718.1  
NM\_001243942.1 XM\_001657893.2  
NM\_001243998.2 XM\_001662691.2  
NM\_001244.4 XM\_021844497.1  
NM\_001244015.2 XM\_021853865.1  
NM\_001244192.2 XM\_021850783.1  
NM\_001245005.2 XM\_021853908.1  
NM\_001247997.2 XM\_001648004.2  
NM\_001248002.2 XM\_021856439.1  
NM\_001251962.2 XR\_002500550.1  
NM\_001251963.2 XR\_002499567.1  
NM\_001251973.2 XM\_021857598.1  
NM\_001251974.2 XM\_021855986.1  
NM\_001252007.1 XM\_021838555.1  
NM\_001252120.2 XR\_002501085.1  
NM\_001252226.2 XM\_021844151.1  
NM\_001252269.2 XM\_001662058.2

NM\_001253723.2 XM\_001656300.2  
NM\_001253750.1 XM\_021842665.1  
NM\_001253793.2 XM\_021851943.1  
NM\_001253826.2 XM\_021839693.1  
NM\_001253846.2 XR\_002499498.1  
NM\_001253853.3 XM\_021851611.1  
NM\_001253891.2 XM\_011495241.2  
NM\_001254.4 XR\_002502586.1  
NM\_001256047.2 XR\_002500610.1  
NM\_001256054.3 XM\_021856685.1  
NM\_001256092.2 XM\_001651573.2  
NM\_001256155.2 XM\_001654825.3  
NM\_001256165.1 XM\_001662721.2  
NM\_001256293.2 XM\_001654683.2  
NM\_001256304.3 XM\_001658422.3  
NM\_001256328.2 XM\_021850491.1  
NM\_001256337.3 XM\_021856443.1  
NM\_001256348.2 XR\_002501117.1  
NM\_001256371.2 XM\_021847995.1  
NM\_001256412.2 XM\_021843833.1  
NM\_001256423.2 XR\_002502269.1  
NM\_001256468.2 XR\_002502606.1  
NM\_001256494.2 XM\_001660777.2  
NM\_001256496.2 XM\_001654663.2  
NM\_001256503.2 XM\_001649169.2  
NM\_001256549.2 XM\_021839552.1  
NM\_001256601.1 XM\_021857554.1  
NM\_001256605.2 XM\_021856624.1  
NM\_001256619.2 XM\_001652103.2  
NM\_001256630.1 XM\_001658226.2  
NM\_001256643.1 XR\_002499161.1  
NM\_001256677.1 XR\_002502195.1  
NM\_001256688.2 XR\_002502099.1  
NM\_001256701.1 XR\_002502041.1  
NM\_001256725.2 XR\_002503095.1  
NM\_001256727.2 XM\_001661421.2  
NM\_001256753.2 XM\_021844756.1  
NM\_001256758.1 XM\_001664031.2  
NM\_001256860.1 XM\_021846816.1  
NM\_001256864.2 XM\_001653428.2  
NM\_001256873.1 XM\_021854109.1  
NM\_001256887.3 XM\_021841327.1  
NM\_001256917.2 XR\_002502159.1  
NM\_001257.5 XM\_001663229.2  
NM\_001257230.2 XM\_021849076.1  
NM\_001257282.2 XM\_021844201.1  
NM\_001257414.2 XM\_021856440.1  
NM\_001258028.2 XM\_001651455.2  
NM\_001258208.2 XM\_011495262.2  
NM\_001258216.1 XR\_002502801.1



NM\_001258252.1 XM\_001654081.2  
NM\_001258264.1 XM\_021839740.1  
NM\_001258269.1 XM\_001648040.2  
NM\_001258298.2 XM\_001655170.2  
NM\_001258324.1 XM\_021852551.1  
NM\_001258325.1 XR\_002502458.1  
NM\_001258331.2 XR\_002500591.1  
NM\_001258355.2 XM\_021845678.1  
NM\_001258373.2 XM\_001651222.2  
NM\_001258379.2 XM\_021848879.1  
NM\_001258395.2 XM\_021843891.1  
NM\_001258399.2 XM\_021854123.1  
NM\_001258416.2 XM\_021838603.1  
NM\_001258418.2 XR\_002503274.1  
NM\_001258447.1 XM\_021843892.1  
NM\_001258450.2 XM\_021842659.1  
NM\_001258453.2 XM\_001650241.2  
NM\_001260510.2 XR\_002502091.1  
NM\_001261409.1 XR\_002499822.1  
NM\_001261818.2 XR\_002501784.1  
NM\_001261837.2 XM\_021851052.1  
NM\_001261838.2 XM\_021850427.1  
NM\_001265578.2 XM\_021843507.1  
NM\_001265608.2 XM\_001663168.2  
NM\_001267040.1 XM\_021854001.1  
NM\_001267064.2 XM\_021842663.1  
NM\_001267571.2 XM\_021856216.1  
NM\_001267574.2 XM\_021843658.1  
NM\_001269048.3 XM\_021841218.1  
NM\_001270375.2 XM\_021846729.1  
NM\_001270400.2 XM\_021843894.1  
NM\_001270411.2 XR\_002503277.1  
NM\_001270420.2 XM\_011494840.2  
NM\_001270437.2 XM\_021852553.1  
NM\_001270453.2 XM\_021854043.1  
NM\_001270492.2 XR\_002502790.1  
NM\_001270501.2 XM\_021844458.1  
NM\_001270530.2 XM\_021852416.1  
NM\_001270532.2 XM\_001651293.2  
NM\_001270601.2 XM\_001660399.2  
NM\_001270623.2 XM\_021846498.1  
NM\_001270695.1 XM\_021846767.1  
NM\_001270709.2 XM\_021846440.1  
NM\_001270733.2 XM\_021843509.1  
NM\_001270766.2 XM\_001662208.2  
NM\_001270841.2 XM\_021848488.1  
NM\_001270895.2 XM\_011495374.2  
NM\_001270941.2 XM\_021842660.1  
NM\_001271012.2 XM\_021852552.1  
NM\_001271023.2 XM\_021856720.1

NM\_001271213.2 XR\_002501739.1  
NM\_001271286.2 XM\_021842516.1  
NM\_001271427.2 XM\_021843510.1  
NM\_001271442.1 XM\_021848487.1  
NM\_001271519.2 XM\_001659290.2  
NM\_001271560.2 XM\_021853071.1  
NM\_001271573.2 XM\_021843837.1  
NM\_001271696.3 XM\_021844839.1  
NM\_001271719.2 XM\_001654236.2  
NM\_001271734.2 XM\_021843033.1  
NM\_001271780.2 XM\_021846924.1  
NM\_001271823.2 XR\_002499785.1  
NM\_001271825.2 XM\_021844160.1  
NM\_001271830.2 XM\_021857013.1  
NM\_001271834.2 XM\_021856711.1  
NM\_001271872.3 XR\_002501742.1  
NM\_001271900.2 XR\_002501514.1  
NM\_001271918.2 XR\_002502374.1  
NM\_001271926.3 XM\_001661608.2  
NM\_001271970.2 XM\_021853604.1  
NM\_001272042.2 XR\_002500530.1  
NM\_001272053.2 XM\_021840918.1  
NM\_001272077.2 XR\_002499263.1  
NM\_001272104.2 XM\_021851123.1  
NM\_001273.5 XM\_021848162.1  
NM\_001276252.2 XM\_001662946.2  
NM\_001276271.2 XR\_002502637.1  
NM\_001276375.2 XM\_001657456.2  
NM\_001276395.2 XM\_021856714.1  
NM\_001276437.2 XM\_021845103.1  
NM\_001276453.2 XR\_002499367.1  
NM\_001276501.2 XM\_021850823.1  
NM\_001276723.2 XR\_002499280.1  
NM\_001276726.2 XM\_021842508.1  
NM\_001277075.3 XM\_021843670.1  
NM\_001277081.1 XR\_002501804.1  
NM\_001277083.2 XM\_021848640.1  
NM\_001277227.2 XR\_002500478.1  
NM\_001277403.2 XM\_021844185.1  
NM\_001277971.2 XM\_021843834.1  
NM\_001278067.1 XR\_002503244.1  
NM\_001278162.2 XM\_021846791.1  
NM\_001278210.2 XM\_001654001.2  
NM\_001278214.2 XM\_001658199.2  
NM\_001278215.2 XM\_001652124.2  
NM\_001278267.1 XM\_001662720.2  
NM\_001278296.2 XM\_001659087.2  
NM\_001278300.2 XM\_021848501.1  
NM\_001278309.2 XM\_021845690.1  
NM\_001278398.2 XM\_001658579.2

NM\_001278428.3 XM\_021845355.1  
NM\_001278432.1 XM\_021838747.1  
NM\_001278464.2 XM\_021844156.1  
NM\_001278471.2 XR\_002498691.1  
NM\_001278499.2 XM\_021843681.1  
NM\_001278500.2 XR\_002500391.1  
NM\_001278503.2 XM\_021857106.1  
NM\_001278512.2 XM\_021844836.1  
NM\_001278524.2 XM\_001661870.2  
NM\_001278546.2 XM\_021843656.1  
NM\_001278548.1 XR\_002499824.1  
NM\_001278549.2 XM\_021845287.1  
NM\_001278559.2 XM\_001660321.2  
NM\_001278592.2 XR\_002500057.1  
NM\_001278599.2 XM\_001653625.3  
NM\_001278603.2 XM\_021848638.1  
NM\_001278606.2 XM\_001659405.2  
NM\_001278610.2 XR\_002498945.1  
NM\_001278618.2 XM\_021856315.1  
NM\_001278629.2 XM\_021838855.1  
NM\_001278639.2 XM\_021838860.1  
NM\_001278641.2 XM\_001652025.2  
NM\_001278645.2 XM\_021843718.1  
NM\_001278678.2 XM\_001658777.2  
NM\_001278715.2 XM\_001652492.2  
NM\_001278794.2 XM\_001658036.3  
NM\_001278928.2 XM\_021844400.1  
NM\_001279.4 XM\_021838854.1  
NM\_001279349.2 XM\_001656551.2  
NM\_001280550.2 XR\_002499342.1  
NM\_001280795.2 XM\_021847660.1  
NM\_001280799.2 XM\_021843716.1  
NM\_001281518.3 XR\_002499823.1  
NM\_001281520.2 XR\_002502953.1  
NM\_001282068.2 XM\_001662289.2  
NM\_001282113.2 XM\_021842507.1  
NM\_001282117.2 XR\_002498731.1  
NM\_001282190.2 XM\_021838091.1  
NM\_001282195.2 XM\_021845679.1  
NM\_001282215.2 XM\_021838862.1  
NM\_001282237.2 XM\_021840238.1  
NM\_001282305.1 XM\_021856773.1  
NM\_001282310.2 XM\_001659866.2  
NM\_001282356.2 XM\_021856164.1  
NM\_001282398.2 XM\_021845076.1  
NM\_001282418.2 XM\_021851047.1  
NM\_001282419.3 XM\_001654676.2  
NM\_001282456.4 XM\_021854029.1  
NM\_001282466.2 XM\_021844261.1  
NM\_001282597.3 XM\_021846764.1

NM\_001282624.2 XM\_021848026.1  
NM\_001282706.2 XM\_021849061.1  
NM\_001282715.2 XM\_021851069.1  
NM\_001282719.2 XM\_021848351.1  
NM\_001282753.2 XM\_021856289.1  
NM\_001282755.2 XR\_002501131.1  
NM\_001282790.2 XM\_021854033.1  
NM\_001282792.2 XR\_002499707.1  
NM\_001282796.2 XM\_001658039.2  
NM\_001282800.2 XM\_021854055.1  
NM\_001282803.2 XM\_021838861.1  
NM\_001282806.2 XM\_021847333.1  
NM\_001282851.2 XM\_021850916.1  
NM\_001282854.2 XM\_021843822.1  
NM\_001282885.2 XM\_001653951.2  
NM\_001282914.2 XM\_021844197.1  
NM\_001282920.1 XM\_021846549.1  
NM\_001282921.2 XR\_002501849.1  
NM\_001282933.2 XM\_001652622.2  
NM\_001282959.2 XM\_021844381.1  
NM\_001283004.3 XM\_021839480.1  
NM\_001283023.2 XM\_021841341.1  
NM\_001283027.1 XM\_021854014.1  
NM\_001283060.2 XM\_021851048.1  
NM\_001283235.3 XM\_021849826.1  
NM\_001284210.2 XM\_021854981.1  
NM\_001284502.2 XM\_021846770.1  
NM\_001284511.2 XR\_002500281.1  
NM\_001284528.2 XM\_021850430.1  
NM\_001285.4 XM\_021851125.1  
NM\_001285526.2 XM\_021853547.1  
NM\_001286.5 XM\_001654897.2  
NM\_001286035.2 XM\_021846562.1  
NM\_001286051.2 XM\_001660659.2  
NM\_001286094.2 XM\_021844163.1  
NM\_001286107.2 XM\_001663935.2  
NM\_001286139.2 XR\_002498993.1  
NM\_001286197.2 XR\_002503138.1  
NM\_001286206.2 XM\_021845548.1  
NM\_001286210.2 XM\_021845414.1  
NM\_001286354.1 XM\_021842384.1  
NM\_001286399.2 XM\_001650789.2  
NM\_001286427.1 XM\_021840096.1  
NM\_001286536.2 XM\_021844333.1  
NM\_001286537.2 XM\_001663454.2  
NM\_001286550.2 XM\_021857047.1  
NM\_001286563.3 XM\_021838761.1  
NM\_001286583.2 XM\_021838863.1  
NM\_001286613.2 XM\_021848233.1  
NM\_001286639.2 XM\_021857485.1

NM\_001286655.1 XM\_021854145.1  
NM\_001286688.2 XM\_021840811.1  
NM\_001286695.1 XM\_021844378.1  
NM\_001286700.2 XM\_021846759.1  
NM\_001286702.2 XM\_021852609.1  
NM\_001286749.2 XM\_021844382.1  
NM\_001286751.2 XM\_001661138.2  
NM\_001286756.2 XR\_002501424.1  
NM\_001286760.1 XM\_021838234.1  
NM\_001286810.2 XM\_021857254.1  
NM\_001286828.2 XR\_002500694.1  
NM\_001286830.2 XM\_021843992.1  
NM\_001286957.2 XR\_002499118.1  
NM\_001287005.2 XM\_001660027.2  
NM\_001287060.2 XM\_021856407.1  
NM\_001287136.1 XM\_021846773.1  
NM\_001287190.2 XM\_021844383.1  
NM\_001287262.2 XR\_002500486.1  
NM\_001287390.3 XM\_001659691.2  
NM\_001287394.2 XM\_021844003.1  
NM\_001287422.2 XM\_021851196.1  
NM\_001287430.1 XM\_021849663.1  
NM\_001287432.2 XM\_021850694.1  
NM\_001287509.2 XM\_021844663.1  
NM\_001287513.2 XR\_002501488.1  
NM\_001287525.2 XM\_001651785.2  
NM\_001287601.1 XM\_021847361.1  
NM\_001288566.2 XM\_001657123.2  
NM\_001288568.2 XM\_021847338.1  
NM\_001288582.2 XM\_001650767.2  
NM\_001288643.2 XR\_002498889.1  
NM\_001288653.2 XM\_021851600.1  
NM\_001288662.1 XM\_021850690.1  
NM\_001288705.3 XM\_021851886.1  
NM\_001288713.1 XR\_002499069.1  
NM\_001288732.2 XR\_002500252.1  
NM\_001288746.2 XR\_002499987.1  
NM\_001288752.2 XR\_002499817.1  
NM\_001288836.1 XM\_021846782.1  
NM\_001288951.2 XM\_021839661.1  
NM\_001288967.2 XM\_021843197.1  
NM\_001288975.2 XM\_021847104.1  
NM\_001288980.2 XM\_021852814.1  
NM\_001288989.2 XM\_021853980.1  
NM\_001289035.2 XM\_021856847.1  
NM\_001289037.2 XM\_021843159.1  
NM\_001289057.2 XR\_002499786.1  
NM\_001289129.2 XM\_021857238.1  
NM\_001289152.2 XM\_021856678.1  
NM\_001289173.2 XR\_002500469.1

NM\_001289180.2 XM\_021838251.1  
NM\_001289184.2 XR\_002500222.1  
NM\_001289189.2 XM\_021849703.1  
NM\_001289396.1 XM\_021846804.1  
NM\_001289399.1 XM\_011494934.2  
NM\_001289911.2 XM\_021843703.1  
NM\_001289975.1 XR\_002501820.1  
NM\_001290030.2 XM\_021839624.1  
NM\_001290059.2 XM\_001653429.2  
NM\_001290184.2 XR\_002498937.1  
NM\_001290194.2 XM\_021838571.1  
NM\_001290233.2 XM\_021853989.1  
NM\_001290258.2 XR\_002501491.1  
NM\_001290360.3 XM\_001660770.2  
NM\_001291281.3 XM\_021854010.1  
NM\_001291308.3 XM\_021852890.1  
NM\_001291328.2 XM\_021856408.1  
NM\_001291454.2 XR\_002501306.1  
NM\_001291491.2 XM\_001650901.3  
NM\_001291527.2 XM\_001657703.2  
NM\_001291588.2 XM\_021851568.1  
NM\_001291700.1 XM\_021852363.1  
NM\_001291716.2 XR\_002501474.1  
NM\_001291719.2 XM\_001650661.2  
NM\_001291732.2 XM\_021842364.1  
NM\_001291738.1 XM\_001647871.2  
NM\_001291813.2 XM\_021842410.1  
NM\_001291826.2 XM\_021842587.1  
NM\_001291837.2 XM\_021841546.1  
NM\_001291860.2 XR\_002503030.1  
NM\_001291873.3 XM\_001650333.2  
NM\_001291879.2 XM\_021854930.1  
NM\_001291896.2 XM\_001647936.2  
NM\_001291918.2 XM\_021841407.1  
NM\_001291931.2 XM\_021842381.1  
NM\_001291956.3 XM\_021851140.1  
NM\_001291979.2 XM\_021843126.1  
NM\_001292004.2 XM\_001652207.2  
NM\_001292018.2 XM\_021853839.1  
NM\_001292048.2 XM\_001659191.3  
NM\_001293213.2 XM\_001652668.2  
NM\_001293628.2 XR\_002499419.1  
NM\_001293810.1 XM\_001649463.2  
NM\_001294332.2 XM\_021853112.1  
NM\_001294335.2 XR\_002502296.1  
NM\_001294338.2 XM\_001657698.2  
NM\_001297424.2 XM\_021852558.1  
NM\_001297435.1 XM\_021839577.1  
NM\_001297440.2 XM\_021845523.1  
NM\_001297569.2 XM\_001650453.2

NM\_001297592.2 XM\_021856310.1  
NM\_001297610.2 XR\_002501445.1  
NM\_001297643.2 XR\_002501588.1  
NM\_001297647.2 XM\_021847809.1  
NM\_001297648.2 XM\_001654094.2  
NM\_001297654.2 XM\_021846288.1  
NM\_001297664.1 XM\_021854105.1  
NM\_001297669.3 XM\_021851650.1  
NM\_001297710.2 XM\_021853413.1  
NM\_001297723.2 XR\_002502372.1  
NM\_001297724.2 XM\_001663951.2  
NM\_001297759.2 XM\_021841448.1  
NM\_001297774.2 XM\_001654289.2  
NM\_001297776.2 XM\_021852923.1  
NM\_001300756.2 XM\_021847541.1  
NM\_001300786.2 XR\_002502740.1  
NM\_001300787.2 XM\_021846438.1  
NM\_001300856.2 XM\_021840924.1  
NM\_001300859.2 XM\_021846478.1  
NM\_001300867.2 XM\_021848859.1  
NM\_001300885.2 XR\_002500027.1  
NM\_001300887.2 XM\_001661874.2  
NM\_001300898.2 XM\_021857483.1  
NM\_001300911.2 XR\_002502197.1  
NM\_001300919.1 XM\_021850685.1  
NM\_001300926.2 XR\_002503190.1  
NM\_001300938.2 XR\_002502999.1  
NM\_001300946.3 XM\_021857110.1  
NM\_001300960.2 XM\_021846854.1  
NM\_001300982.2 XM\_021837317.1  
NM\_001300990.2 XM\_021839485.1  
NM\_001300992.2 XM\_001657621.2  
NM\_001301021.2 XM\_011494795.2  
NM\_001301028.3 XM\_021849961.1  
NM\_001301031.1 XM\_001659105.2  
NM\_001301097.1 XM\_021855772.1  
NM\_001301134.2 XR\_002500219.1  
NM\_001301244.2 XM\_001659476.2  
NM\_001301253.2 XM\_001658646.2  
NM\_001301409.2 XM\_001652481.2  
NM\_001301645.2 XM\_021839738.1  
NM\_001301648.2 XM\_021837951.1  
NM\_001301775.2 XM\_021853956.1  
NM\_001301828.2 XM\_021844966.1  
NM\_001301830.2 XM\_021842951.1  
NM\_001302509.2 XM\_021843803.1  
NM\_001302554.2 XM\_021850134.1  
NM\_001302622.2 XM\_021843526.1  
NM\_001302688.2 XR\_002500729.1  
NM\_001302695.2 XM\_021846883.1

NM\_001302817.3 XM\_021843001.1  
NM\_001302836.2 XM\_001656173.2  
NM\_001303000.2 XM\_001653370.2  
NM\_001303030.2 XR\_002499134.1  
NM\_001303037.2 XM\_021841596.1  
NM\_001303047.2 XM\_011495175.2  
NM\_001303235.2 XM\_021857168.1  
NM\_001303255.3 XM\_001655409.2  
NM\_001303276.2 XM\_021854172.1  
NM\_001303459.3 XM\_001649686.2  
NM\_001303475.1 XM\_021848054.1  
NM\_001303477.2 XM\_021844447.1  
NM\_001303487.3 XM\_001655924.2  
NM\_001303498.3 XM\_021844461.1  
NM\_001303615.2 XM\_021842377.1  
NM\_001303619.2 XM\_001654548.2  
NM\_001304331.2 XM\_001656508.2  
NM\_001304345.2 XM\_001649188.2  
NM\_001304360.2 XM\_021849300.1  
NM\_001304488.1 XM\_021851138.1  
NM\_001304489.1 XM\_021856894.1  
NM\_001304500.2 XM\_021853405.1  
NM\_001304507.1 XM\_021848615.1  
NM\_001304513.2 XR\_002502564.1  
NM\_001304549.2 XM\_021845107.1  
NM\_001304569.2 XR\_002500382.1  
NM\_001304763.2 XM\_021852372.1  
NM\_001304808.3 XM\_021847718.1  
NM\_001304814.2 XM\_021851750.1  
NM\_001304819.2 XM\_021853279.1  
NM\_001304834.2 XM\_021837528.1  
NM\_001304942.2 XM\_021856154.1  
NM\_001304947.3 XR\_002500493.1  
NM\_001304957.2 XM\_001656281.2  
NM\_001304993.2 XM\_021854506.1  
NM\_001305080.2 XR\_002502366.1  
NM\_001305108.1 XR\_002500983.1  
NM\_001305208.2 XM\_021850975.1  
NM\_001305457.2 XM\_021854332.1  
NM\_001305545.1 XM\_021850808.1  
NM\_001305625.2 XM\_021841547.1  
NM\_001306070.2 XM\_021842990.1  
NM\_001306092.2 XM\_021838740.1  
NM\_001306151.2 XR\_002502097.1  
NM\_001306160.3 XM\_011494945.2  
NM\_001306172.2 XM\_021851061.1  
NM\_001306197.2 XM\_021838684.1  
NM\_001306200.2 XM\_021841902.1  
NM\_001306214.2 XM\_021844071.1  
NM\_001307976.2 XM\_021842484.1



NM\_001308023.2 XR\_002502014.1  
NM\_001308028.2 XM\_021853447.1  
NM\_001308075.2 XM\_021848645.1  
NM\_001308080.2 XM\_021852913.1  
NM\_001308097.2 XM\_021850182.1  
NM\_001308105.1 XM\_021838341.1  
NM\_001308119.2 XM\_021856589.1  
NM\_001308161.1 XM\_021842916.1  
NM\_001308169.2 XM\_001660482.2  
NM\_001308185.2 XM\_021837693.1  
NM\_001308203.2 XM\_021843896.1  
NM\_001308237.2 XM\_001657229.2  
NM\_001308242.2 XR\_002501766.1  
NM\_001308264.2 XM\_021855639.1  
NM\_001308342.2 XM\_021843865.1  
NM\_001308430.2 XM\_001661471.2  
NM\_001308469.3 XR\_002498875.1  
NM\_001308954.2 XM\_021840545.1  
NM\_001309193.2 XM\_021851136.1  
NM\_001309427.2 XM\_021853484.1  
NM\_001309450.2 XM\_021855888.1  
NM\_001310137.3 XM\_021843788.1  
NM\_001310160.2 XR\_002499812.1  
NM\_001311197.2 XM\_021842376.1  
NM\_001311311.2 XM\_021852910.1  
NM\_001312921.2 XM\_011494754.2  
NM\_001313741.1 XM\_021844074.1  
NM\_001313943.2 XR\_002502603.1  
NM\_001313953.3 XM\_021851139.1  
NM\_001314052.2 XM\_021850657.1  
NM\_001315.3 XM\_001660731.2  
NM\_001316314.3 XM\_021850835.1  
NM\_001316317.2 XR\_002502679.1  
NM\_001316348.2 XM\_021851137.1  
NM\_001316358.2 XM\_021841339.1  
NM\_001316374.2 XR\_002500901.1  
NM\_001316943.2 XM\_021845506.1  
NM\_001316965.2 XM\_001656167.2  
NM\_001317019.1 XM\_021851824.1  
NM\_001317034.1 XR\_002499590.1  
NM\_001317062.2 XM\_021842563.1  
NM\_001317103.2 XR\_002500827.1  
NM\_001317120.2 XM\_001662114.2  
NM\_001317161.2 XM\_021844504.1  
NM\_001317184.2 XR\_002498975.1  
NM\_001317406.3 XM\_021841474.1  
NM\_001317721.2 XM\_001660709.2  
NM\_001317740.2 XM\_001657255.3  
NM\_001317774.1 XR\_002499599.1  
NM\_001317781.2 XM\_021849557.1

NM\_001317788.2 XM\_021841123.1  
NM\_001317789.1 XR\_002503215.1  
NM\_001317804.2 XM\_021857050.1  
NM\_001317891.1 XM\_021845196.1  
NM\_001317895.2 XM\_001648213.2  
NM\_001317919.2 XM\_021842472.1  
NM\_001317935.2 XM\_021843007.1  
NM\_001317943.2 XM\_001662940.2  
NM\_001317992.2 XM\_021851965.1  
NM\_001318021.1 XM\_001663913.2  
NM\_001318022.2 XM\_021842475.1  
NM\_001318036.2 XM\_001659128.2  
NM\_001318042.2 XM\_021839379.1  
NM\_001318068.1 XM\_001654523.2  
NM\_001318082.2 XM\_001648138.2  
NM\_001318091.2 XM\_001657015.2  
NM\_001318154.2 XM\_001652433.2  
NM\_001318199.3 XM\_021853134.1  
NM\_001318226.2 XM\_001647622.2  
NM\_001318238.2 XM\_021848336.1  
NM\_001318239.2 XR\_002502621.1  
NM\_001318500.2 XM\_021855469.1  
NM\_001318710.2 XM\_021857141.1  
NM\_001318715.2 XM\_001663442.2  
NM\_001318726.2 XM\_021849829.1  
NM\_001318761.2 XR\_002503012.1  
NM\_001318781.2 XM\_021847329.1  
NM\_001318787.2 XM\_011495397.2  
NM\_001318800.2 XM\_001658372.2  
NM\_001318815.2 XR\_002498748.1  
NM\_001318830.2 XM\_001659903.2  
NM\_001318841.2 XR\_002499356.1  
NM\_001318855.1 XM\_021842564.1  
NM\_001318870.2 XM\_001657774.2  
NM\_001318873.2 XM\_021856900.1  
NM\_001318909.2 XM\_021841084.1  
NM\_001318928.2 XM\_021857108.1  
NM\_001318942.1 XR\_002502872.1  
NM\_001318945.2 XM\_021847086.1  
NM\_001319039.2 XM\_021850042.1  
NM\_001319062.2 XM\_021855047.1  
NM\_001319092.1 XM\_001653496.2  
NM\_001319110.2 XM\_021847802.1  
NM\_001319198.2 XM\_021845932.1  
NM\_001319217.2 XM\_021857071.1  
NM\_001319220.2 XM\_021842782.1  
NM\_001319228.2 XM\_021851967.1  
NM\_001319229.2 XM\_021856951.1  
NM\_001319242.1 XM\_021850097.1  
NM\_001319295.2 XM\_021854944.1

NM\_001319297.2 XM\_021856715.1  
NM\_001319658.2 XR\_002500678.1  
NM\_001319664.2 XM\_021848764.1  
NM\_001319952.2 XM\_021852470.1  
NM\_001319960.2 XM\_021855633.1  
NM\_001319988.2 XM\_001654710.2  
NM\_001320000.2 XM\_001659028.2  
NM\_001320050.2 XM\_001663670.2  
NM\_001320134.1 XM\_021848707.1  
NM\_001320210.2 XM\_011495042.2  
NM\_001320219.2 XM\_021847031.1  
NM\_001320321.2 XM\_021847428.1  
NM\_001320351.2 XM\_021849998.1  
NM\_001320365.2 XM\_001657243.3  
NM\_001320458.2 XM\_021854057.1  
NM\_001320488.2 XM\_021840643.1  
NM\_001320511.2 XM\_001654262.2  
NM\_001320546.3 XM\_021853690.1  
NM\_001320555.2 XM\_021855041.1  
NM\_001320557.2 XM\_021846765.1  
NM\_001320585.1 XR\_002498800.1  
NM\_001320592.2 XM\_011494887.2  
NM\_001320597.2 XM\_021842405.1  
NM\_001320608.2 XM\_021848885.1  
NM\_001320624.1 XM\_021851287.1  
NM\_001320714.2 XM\_021845029.1  
NM\_001320715.2 XM\_021838512.1  
NM\_001320722.3 XM\_001656686.2  
NM\_001320746.3 XM\_021850775.1  
NM\_001320750.3 XM\_021851073.1  
NM\_001320830.2 XM\_021838010.1  
NM\_001320840.2 XM\_021841085.1  
NM\_001320849.2 XM\_021856541.1  
NM\_001320851.2 XR\_002500421.1  
NM\_001320865.2 XM\_001653939.2  
NM\_001320870.2 XM\_001659150.2  
NM\_001320872.2 XM\_021856892.1  
NM\_001320883.2 XM\_021851477.1  
NM\_001320933.2 XM\_021844287.1  
NM\_001320948.2 XM\_021852024.1  
NM\_001320953.2 XM\_001661599.2  
NM\_001320971.2 XM\_001654839.2  
NM\_001321007.2 XM\_001648211.2  
NM\_001321015.2 XM\_001652006.2  
NM\_001321018.2 XR\_002499649.1  
NM\_001321072.1 XM\_021856460.1  
NM\_001321107.2 XM\_021853424.1  
NM\_001321144.2 XM\_021838340.1  
NM\_001321224.2 XM\_001651325.2  
NM\_001321234.2 XR\_002500909.1

NM\_001321266.2 XM\_021840091.1  
NM\_001321285.2 XM\_001659467.2  
NM\_001321356.2 XM\_021848040.1  
NM\_001321363.2 XM\_021846481.1  
NM\_001321365.2 XM\_021852505.1  
NM\_001321369.2 XM\_021854512.1  
NM\_001321381.3 XR\_002502935.1  
NM\_001321458.2 XM\_001656432.2  
NM\_001321470.1 XM\_021850938.1  
NM\_001321501.2 XR\_002498704.1  
NM\_001321525.1 XM\_001659473.2  
NM\_001321592.2 XM\_021850720.1  
NM\_001321612.2 XR\_002500160.1  
NM\_001321617.2 XM\_021843198.1  
NM\_001321677.2 XR\_002503261.1  
NM\_001321747.2 XM\_001650139.2  
NM\_001321808.2 XR\_002500018.1  
NM\_001321868.2 XM\_021857564.1  
NM\_001321881.2 XM\_021856331.1  
NM\_001321907.3 XM\_001662070.2  
NM\_001321908.3 XM\_021856975.1  
NM\_001321923.2 XM\_021846585.1  
NM\_001321927.1 XM\_021846993.1  
NM\_001321929.1 XM\_021852621.1  
NM\_001321935.1 XM\_001658594.3  
NM\_001321953.2 XM\_021854513.1  
NM\_001321972.2 XR\_002500077.1  
NM\_001321983.2 XM\_001664214.2  
NM\_001321993.3 XM\_001660375.2  
NM\_001322012.2 XR\_002502951.1  
NM\_001322028.2 XR\_002501124.1  
NM\_001322029.2 XM\_021845873.1  
NM\_001322085.2 XM\_021857088.1  
NM\_001322147.2 XM\_021838562.1  
NM\_001322164.2 XM\_001658061.2  
NM\_001322180.2 XM\_021842480.1  
NM\_001322215.2 XM\_021845190.1  
NM\_001322221.2 XM\_021844471.1  
NM\_001322252.2 XM\_021852397.1  
NM\_001322256.2 XR\_002502005.1  
NM\_001322296.2 XM\_021854818.1  
NM\_001322367.1 XM\_021848380.1  
NM\_001322391.2 XM\_021837265.1  
NM\_001322402.3 XM\_021845088.1  
NM\_001322494.1 XM\_021852447.1  
NM\_001322840.2 XM\_021851702.1  
NM\_001322861.2 XM\_001662825.2  
NM\_001322889.2 XM\_021855088.1  
NM\_001322902.2 XM\_021854300.1  
NM\_001322920.1 XM\_001653224.2

NM\_001322929.2 XM\_001647730.2  
NM\_001322930.2 XM\_021854819.1  
NM\_001322963.2 XM\_021848231.1  
NM\_001322971.2 XM\_021839797.1  
NM\_001323022.1 XR\_002500313.1  
NM\_001323067.2 XM\_021841462.1  
NM\_001323073.1 XM\_021842938.1  
NM\_001323255.2 XM\_021842382.1  
NM\_001323304.2 XM\_021851536.1  
NM\_001323329.2 XM\_021843002.1  
NM\_001323342.2 XM\_001654503.2  
NM\_001323360.2 XM\_001648559.2  
NM\_001323367.2 XM\_021855119.1  
NM\_001323377.2 XM\_021845198.1  
NM\_001323382.2 XM\_021840727.1  
NM\_001323389.2 XM\_021849889.1  
NM\_001323395.2 XM\_021852028.1  
NM\_001323543.2 XM\_001663586.2  
NM\_001323563.2 XM\_021838195.1  
NM\_001323575.2 XM\_021851537.1  
NM\_001323578.2 XR\_002499262.1  
NM\_001323644.2 XM\_021856069.1  
NM\_001323657.2 XM\_001654882.2  
NM\_001323674.2 XM\_001659207.2  
NM\_001323681.2 XM\_021837858.1  
NM\_001323906.2 XM\_001648230.3  
NM\_001323907.2 XM\_021849187.1  
NM\_001323911.2 XM\_021844141.1  
NM\_001323930.2 XR\_002503226.1  
NM\_001323948.2 XM\_021839729.1  
NM\_001323964.2 XM\_021852067.1  
NM\_001323972.2 XM\_021845703.1  
NM\_001323973.2 XM\_021852546.1  
NM\_001324002.1 XM\_001657709.2  
NM\_001324003.1 XM\_021842311.1  
NM\_001324025.2 XM\_021854104.1  
NM\_001324029.3 XM\_021843255.1  
NM\_001324067.2 XR\_002503097.1  
NM\_001324092.2 XM\_021843501.1  
NM\_001324093.2 XR\_002500417.1  
NM\_001324094.2 XM\_001654213.2  
NM\_001324109.2 XM\_021839567.1  
NM\_001324116.3 XM\_021857437.1  
NM\_001324119.2 XM\_001659086.2  
NM\_001324138.2 XM\_001655261.2  
NM\_001324169.2 XM\_021844172.1  
NM\_001324171.2 XR\_002503134.1  
NM\_001324178.2 XM\_001652473.2  
NM\_001324186.2 XM\_021853067.1  
NM\_001324187.1 XR\_002502537.1

NM\_001324198.2 XM\_021848762.1  
NM\_001324201.2 XM\_021839043.1  
NM\_001324202.2 XM\_001658100.2  
NM\_001324220.2 XM\_021849726.1  
NM\_001324230.2 XM\_021842388.1  
NM\_001324242.2 XM\_021843708.1  
NM\_001324283.2 XM\_021854553.1  
NM\_001324294.2 XM\_021853233.1  
NM\_001324296.2 XM\_001650039.2  
NM\_001324303.2 XM\_001662227.2  
NM\_001324304.2 XM\_021845034.1  
NM\_001324343.2 XM\_021852674.1  
NM\_001324353.2 XM\_001663607.2  
NM\_001324354.2 XR\_002502859.1  
NM\_001324357.2 XM\_021849648.1  
NM\_001324387.2 XM\_021843721.1  
NM\_001324390.1 XM\_021848536.1  
NM\_001324415.2 XM\_021857073.1  
NM\_001324446.2 XM\_021842596.1  
NM\_001326314.2 XM\_021845197.1  
NM\_001326332.2 XR\_002502965.1  
NM\_001328620.2 XM\_021850038.1  
NM\_001328627.1 XM\_001654943.2  
NM\_001328646.3 XM\_021839037.1  
NM\_001328654.2 XM\_021851900.1  
NM\_001328674.2 XR\_002499032.1  
NM\_001329137.2 XM\_001659994.3  
NM\_001329144.2 XM\_021849145.1  
NM\_001329201.2 XR\_002502238.1  
NM\_001329442.2 XM\_001650048.2  
NM\_001329586.2 XM\_001657486.2  
NM\_001329615.2 XR\_002501018.1  
NM\_001329633.2 XR\_002500411.1  
NM\_001329634.1 XM\_021853795.1  
NM\_001329718.2 XM\_021856887.1  
NM\_001329723.2 XM\_021856208.1  
NM\_001329763.2 XM\_021842085.1  
NM\_001329775.2 XM\_001656698.2  
NM\_001329803.2 XM\_021837992.1  
NM\_001329911.2 XM\_001654504.2  
NM\_001329919.2 XM\_001663991.2  
NM\_001329920.2 XM\_021844370.1  
NM\_001329974.2 XM\_021843502.1  
NM\_001330000.2 XM\_001655288.2  
NM\_001330059.2 XM\_021845822.1  
NM\_001330062.2 XM\_021851241.1  
NM\_001330094.2 XM\_021848400.1  
NM\_001330113.2 XM\_001655801.2  
NM\_001330115.2 XM\_001656755.2  
NM\_001330125.1 XM\_021850727.1

NM\_001330128.2 XM\_021843649.1  
NM\_001330130.2 XR\_002502355.1  
NM\_001330132.2 XM\_021840371.1  
NM\_001330148.2 XM\_021837315.1  
NM\_001330157.2 XM\_001653262.2  
NM\_001330170.2 XM\_001660969.2  
NM\_001330183.2 XM\_001650004.2  
NM\_001330187.2 XM\_021850811.1  
NM\_001330214.1 XM\_021845007.1  
NM\_001330227.3 XR\_002501470.1  
NM\_001330250.1 XM\_021850773.1  
NM\_001330252.2 XM\_021837307.1  
NM\_001330285.2 XM\_001661936.2  
NM\_001330303.2 XM\_021837320.1  
NM\_001330310.2 XM\_021841675.1  
NM\_001330316.2 XR\_002499059.1  
NM\_001330326.2 XM\_021852711.1  
NM\_001330354.2 XM\_021842302.1  
NM\_001330373.2 XM\_021842308.1  
NM\_001330380.2 XM\_021855513.1  
NM\_001330388.2 XM\_021842303.1  
NM\_001330404.2 XM\_021854650.1  
NM\_001330406.2 XM\_021856721.1  
NM\_001330420.2 XM\_021841356.1  
NM\_001330442.2 XM\_021846281.1  
NM\_001330447.2 XM\_001657901.2  
NM\_001330475.2 XM\_021845560.1  
NM\_001330514.2 XM\_021857246.1  
NM\_001330521.2 XR\_002498699.1  
NM\_001330537.2 XM\_021856324.1  
NM\_001330570.3 XM\_021845933.1  
NM\_001330613.2 XM\_021851419.1  
NM\_001330645.2 XM\_001657197.2  
NM\_001330713.2 XM\_021854464.1  
NM\_001330721.2 XR\_002499859.1  
NM\_001330723.2 XM\_021843375.1  
NM\_001330728.1 XM\_001657341.2  
NM\_001330729.2 XM\_021856415.1  
NM\_001330750.2 XM\_001649107.2  
NM\_001330759.2 XM\_021841674.1  
NM\_001330996.3 XM\_021842470.1  
NM\_001331066.2 XM\_021837860.1  
NM\_001331071.3 XM\_021843024.1  
NM\_001331158.2 XM\_001658754.2  
NM\_001331211.2 XM\_021842228.1  
NM\_001344.4 XM\_021853747.1  
NM\_001345881.2 XR\_002499098.1  
NM\_001345882.2 XR\_002503002.1  
NM\_001345888.2 XR\_002500582.1  
NM\_001345909.2 XM\_021844106.1

NM\_001345949.3 XM\_021844351.1  
NM\_001345977.1 XR\_002499612.1  
NM\_001346004.2 XM\_021842511.1  
NM\_001346070.2 XR\_002501380.1  
NM\_001346103.2 XM\_001650120.2  
NM\_001346116.2 XM\_021846390.1  
NM\_001346139.1 XM\_021849423.1  
NM\_001346223.2 XR\_002498846.1  
NM\_001346227.2 XM\_021842895.1  
NM\_001346229.2 XM\_021850572.1  
NM\_001346253.2 XM\_001648666.2  
NM\_001346254.2 XM\_021852619.1  
NM\_001346268.2 XM\_021844403.1  
NM\_001346311.2 XM\_021843252.1  
NM\_001346341.2 XM\_021847805.1  
NM\_001346342.2 XM\_021840604.1  
NM\_001346353.2 XM\_001658075.2  
NM\_001346382.2 XM\_021851428.1  
NM\_001346404.1 XM\_021854339.1  
NM\_001346413.2 XM\_021851812.1  
NM\_001346450.2 XM\_021845875.1  
NM\_001346457.2 XR\_002498602.1  
NM\_001346474.2 XM\_001657900.2  
NM\_001346477.2 XM\_021852029.1  
NM\_001346482.1 XM\_021843254.1  
NM\_001346543.2 XR\_002502356.1  
NM\_001346548.2 XM\_021840011.1  
NM\_001346549.2 XM\_001649597.2  
NM\_001346560.3 XM\_021843210.1  
NM\_001346603.2 XM\_021852579.1  
NM\_001346719.2 XM\_001652301.2  
NM\_001346818.1 XM\_021844986.1  
NM\_001346862.2 XM\_011495227.2  
NM\_001346932.2 XM\_021844769.1  
NM\_001346934.2 XM\_021852309.1  
NM\_001346946.2 XR\_002499982.1  
NM\_001346955.2 XM\_001650094.2  
NM\_001346972.2 XM\_021845701.1  
NM\_001347015.2 XM\_021851214.1  
NM\_001347018.2 XM\_021841599.1  
NM\_001347031.2 XM\_021844671.1  
NM\_001347096.2 XM\_001653925.2  
NM\_001347219.2 XM\_001655139.2  
NM\_001347664.1 XM\_021857247.1  
NM\_001347703.2 XM\_021840823.1  
NM\_001347738.2 XM\_001651818.2  
NM\_001347828.2 XR\_002502343.1  
NM\_001347849.2 XM\_021843650.1  
NM\_001347864.2 XM\_001650929.3  
NM\_001347893.2 XM\_021852031.1



NM\_001347895.2 XM\_021843646.1  
NM\_001347898.2 XR\_002501948.1  
NM\_001347946.2 XM\_021839581.1  
NM\_001347947.2 XM\_001656413.2  
NM\_001347967.2 XM\_001652696.2  
NM\_001347997.2 XR\_002499715.1  
NM\_001348013.2 XM\_001656592.2  
NM\_001348129.2 XM\_021847359.1  
NM\_001348136.2 XM\_021843161.1  
NM\_001348144.2 XM\_021856693.1  
NM\_001348189.2 XM\_021844291.1  
NM\_001348203.1 XM\_021842943.1  
NM\_001348233.2 XM\_021857032.1  
NM\_001348239.2 XR\_002499757.1  
NM\_001348300.1 XM\_021848063.1  
NM\_001348304.1 XM\_001653085.2  
NM\_001348322.1 XM\_021839829.1  
NM\_001348323.3 XM\_001651837.2  
NM\_001348372.2 XR\_002502833.1  
NM\_001348397.2 XR\_002499499.1  
NM\_001348424.1 XM\_021846862.1  
NM\_001348460.2 XM\_021856757.1  
NM\_001348466.2 XM\_001656961.2  
NM\_001348509.2 XM\_021839728.1  
NM\_001348542.2 XM\_021839727.1  
NM\_001348547.2 XM\_021857165.1  
NM\_001348702.2 XM\_001653703.2  
NM\_001348735.2 XM\_021842616.1  
NM\_001348756.2 XR\_002499417.1  
NM\_001348764.2 XM\_021846792.1  
NM\_001348768.2 XM\_021848486.1  
NM\_001348781.2 XM\_021843342.1  
NM\_001348986.1 XM\_021850742.1  
NM\_001348988.1 XM\_001654139.2  
NM\_001349012.1 XR\_002502715.1  
NM\_001349041.2 XM\_021853864.1  
NM\_001349044.2 XM\_021842723.1  
NM\_001349099.2 XM\_001648710.2  
NM\_001349104.2 XM\_001659763.2  
NM\_001349112.3 XM\_001648209.2  
NM\_001349149.2 XM\_021854061.1  
NM\_001349157.2 XM\_001649791.2  
NM\_001349158.2 XM\_021843315.1  
NM\_001349168.2 XM\_021842724.1  
NM\_001349191.2 XM\_021844149.1  
NM\_001349193.2 XM\_021854559.1  
NM\_001349222.2 XM\_001660997.2  
NM\_001349230.2 XM\_001653828.2  
NM\_001349242.2 XM\_021844278.1  
NM\_001349258.2 XM\_001651312.2

NM\_001349261.2 XM\_021853810.1  
NM\_001349263.2 XM\_021839546.1  
NM\_001349297.2 XM\_021856614.1  
NM\_001349312.2 XM\_021846109.1  
NM\_001349320.2 XM\_021842324.1  
NM\_001349350.2 XM\_021851746.1  
NM\_001349359.2 XM\_021842725.1  
NM\_001349362.2 XM\_021840889.1  
NM\_001349378.2 XM\_001648797.2  
NM\_001349379.2 XM\_001651301.2  
NM\_001349383.1 XM\_021847999.1  
NM\_001349385.1 XM\_021838774.1  
NM\_001349390.2 XM\_001662630.2  
NM\_001349394.2 XM\_021855278.1  
NM\_001349395.2 XM\_021848072.1  
NM\_001349402.2 XM\_021853615.1  
NM\_001349413.1 XM\_021849164.1  
NM\_001349450.1 XM\_021842727.1  
NM\_001349457.2 XM\_001662758.2  
NM\_001349460.2 XM\_001655850.2  
NM\_001349464.2 XM\_021844275.1  
NM\_001349476.1 XR\_002502130.1  
NM\_001349479.1 XM\_021847370.1  
NM\_001349498.1 XM\_021844050.1  
NM\_001349551.2 XM\_021847679.1  
NM\_001349623.1 XM\_021843112.1  
NM\_001349635.1 XM\_021844640.1  
NM\_001349661.2 XM\_021851429.1  
NM\_001349711.2 XM\_021838057.1  
NM\_001349712.2 XR\_002502017.1  
NM\_001349735.2 XR\_002501375.1  
NM\_001349743.2 XR\_002499925.1  
NM\_001349776.2 XM\_021837308.1  
NM\_001349803.3 XM\_021842290.1  
NM\_001349853.2 XR\_002498709.1  
NM\_001349866.2 XM\_021852382.1  
NM\_001349921.2 XM\_021842528.1  
NM\_001349935.2 XM\_001659672.2  
NM\_001349969.2 XM\_021839630.1  
NM\_001349990.2 XM\_021850740.1  
NM\_001349991.2 XM\_021837353.1  
NM\_001350017.2 XM\_021849531.1  
NM\_001350022.2 XM\_001658963.2  
NM\_001350043.2 XM\_021850802.1  
NM\_001350044.2 XM\_021839719.1  
NM\_001350115.2 XM\_021855951.1  
NM\_001350123.2 XM\_001650904.2  
NM\_001350234.2 XM\_021850353.1  
NM\_001350251.2 XM\_021838545.1  
NM\_001350262.2 XM\_021844876.1

NM\_001350303.2 XM\_001663217.2  
NM\_001350310.2 XM\_021851529.1  
NM\_001350327.2 XM\_021839430.1  
NM\_001350331.2 XM\_011495002.2  
NM\_001350394.2 XM\_021848907.1  
NM\_001350398.2 XM\_021844996.1  
NM\_001350399.2 XM\_021839717.1  
NM\_001350402.1 XM\_021844659.1  
NM\_001350442.2 XM\_001657927.2  
NM\_001350446.2 XM\_021852355.1  
NM\_001350456.2 XM\_021848053.1  
NM\_001350506.2 XM\_001650110.3  
NM\_001350514.2 XM\_001651706.3  
NM\_001350565.2 XM\_001654953.2  
NM\_001350570.2 XM\_001650995.2  
NM\_001350581.2 XM\_001648775.2  
NM\_001350602.2 XM\_021852904.1  
NM\_001350614.2 XM\_001660506.2  
NM\_001350629.2 XM\_021856308.1  
NM\_001350635.3 XM\_021848700.1  
NM\_001350645.2 XM\_001655624.2  
NM\_001350681.1 XR\_002500903.1  
NM\_001350714.2 XM\_021851427.1  
NM\_001350745.2 XM\_021843220.1  
NM\_001350769.2 XM\_021843031.1  
NM\_001350781.1 XM\_001655171.2  
NM\_001350829.2 XM\_001650404.2  
NM\_001350894.1 XM\_021844617.1  
NM\_001350898.2 XM\_021854336.1  
NM\_001350913.2 XM\_021853926.1  
NM\_001350922.2 XM\_021846189.1  
NM\_001350936.2 XM\_021838972.1  
NM\_001350955.2 XR\_002501675.1  
NM\_001351023.2 XM\_001660792.2  
NM\_001351044.2 XM\_001658809.2  
NM\_001351059.2 XM\_001654174.2  
NM\_001351068.2 XM\_021842500.1  
NM\_001351076.2 XM\_001660501.2  
NM\_001351087.2 XM\_021842086.1  
NM\_001351100.2 XR\_002502162.1  
NM\_001351114.2 XM\_001660509.2  
NM\_001351123.2 XM\_001653591.2  
NM\_001351127.2 XM\_021842707.1  
NM\_001351136.2 XM\_021845146.1  
NM\_001351140.2 XM\_001654018.2  
NM\_001351149.2 XM\_021842469.1  
NM\_001351163.2 XM\_021841422.1  
NM\_001351222.2 XR\_002501932.1  
NM\_001351242.2 XM\_021850906.1  
NM\_001351243.2 XM\_021843011.1

NM\_001351263.2 XM\_021845065.1  
NM\_001351266.2 XM\_021842986.1  
NM\_001351271.2 XM\_021839792.1  
NM\_001351293.2 XR\_002501991.1  
NM\_001351302.3 XM\_001654417.2  
NM\_001351336.2 XR\_002502530.1  
NM\_001351357.2 XR\_002500622.1  
NM\_001351367.2 XM\_001651675.2  
NM\_001351392.2 XM\_001663531.2  
NM\_001351408.2 XM\_021840373.1  
NM\_001351418.2 XM\_021845649.1  
NM\_001351462.2 XR\_002503160.1  
NM\_001351488.2 XM\_021837733.1  
NM\_001351509.2 XM\_021837340.1  
NM\_001351521.2 XM\_021841100.1  
NM\_001351531.2 XM\_021845564.1  
NM\_001351532.2 XM\_021846197.1  
NM\_001351568.3 XM\_021856145.1  
NM\_001351587.2 XM\_021839722.1  
NM\_001351589.2 XM\_021844492.1  
NM\_001351609.2 XM\_021854130.1  
NM\_001351615.2 XR\_002502867.1  
NM\_001351616.1 XM\_021838203.1  
NM\_001351624.2 XM\_021838756.1  
NM\_001351644.2 XM\_021842087.1  
NM\_001351835.2 XR\_002502511.1  
NM\_001351942.2 XM\_021850020.1  
NM\_001351959.2 XR\_002500813.1  
NM\_001351970.2 XM\_021845856.1  
NM\_001352027.3 XM\_021838614.1  
NM\_001352053.2 XM\_021847406.1  
NM\_001352057.2 XR\_002500090.1  
NM\_001352081.2 XM\_021854505.1  
NM\_001352098.2 XR\_002500900.1  
NM\_001352102.2 XM\_021848796.1  
NM\_001352106.2 XM\_021838895.1  
NM\_001352108.2 XM\_021844406.1  
NM\_001352139.2 XM\_011495019.2  
NM\_001352161.2 XM\_001652122.2  
NM\_001352162.2 XM\_001655974.2  
NM\_001352173.2 XM\_001656494.2  
NM\_001352210.2 XM\_021837953.1  
NM\_001352242.2 XM\_011495049.2  
NM\_001352308.2 XM\_001653694.2  
NM\_001352411.2 XM\_021843247.1  
NM\_001352442.2 XM\_001653285.2  
NM\_001352498.2 XM\_001653189.2  
NM\_001352516.2 XM\_021847497.1  
NM\_001352517.1 XM\_021849736.1  
NM\_001352529.2 XM\_021842936.1

NM\_001352539.2 XM\_021851333.1  
NM\_001352542.2 XR\_002499379.1  
NM\_001352615.2 XM\_021842855.1  
NM\_001352617.2 XM\_001657204.2  
NM\_001352618.2 XM\_021845321.1  
NM\_001352670.2 XM\_001662842.2  
NM\_001352671.2 XM\_021844444.1  
NM\_001352684.2 XR\_002501420.1  
NM\_001352695.2 XM\_001654505.2  
NM\_001352718.2 XR\_002500176.1  
NM\_001352750.2 XR\_002501413.1  
NM\_001352764.2 XM\_021843119.1  
NM\_001352825.2 XM\_021856178.1  
NM\_001352826.2 XM\_001648139.3  
NM\_001352849.2 XM\_021843846.1  
NM\_001352881.1 XM\_021848305.1  
NM\_001352910.2 XR\_002502364.1  
NM\_001352912.1 XM\_021839040.1  
NM\_001352934.1 XM\_021857729.1  
NM\_001352949.1 XR\_002502761.1  
NM\_001352961.1 XM\_021841598.1  
NM\_001352988.2 XM\_021851071.1  
NM\_001352995.2 XM\_001654153.2  
NM\_001353006.2 XM\_021851467.1  
NM\_001353011.2 XM\_001648229.2  
NM\_001353018.2 XM\_021843335.1  
NM\_001353023.2 XM\_021852335.1  
NM\_001353064.2 XM\_001647784.2  
NM\_001353075.1 XM\_021853568.1  
NM\_001353098.2 XM\_001663447.2  
NM\_001353124.2 XM\_021853046.1  
NM\_001353154.1 XM\_001656742.2  
NM\_001353207.1 XM\_001655673.2  
NM\_001353222.2 XR\_002500817.1  
NM\_001353229.2 XM\_021842848.1  
NM\_001353232.1 XM\_021847117.1  
NM\_001353237.1 XM\_021839944.1  
NM\_001353248.2 XM\_001651300.2  
NM\_001353301.2 XM\_021852310.1  
NM\_001353302.1 XR\_002500770.1  
NM\_001353313.2 XM\_001656603.2  
NM\_001353320.2 XM\_021856241.1  
NM\_001353340.1 XM\_021855736.1  
NM\_001353486.2 XM\_001663333.2  
NM\_001353533.2 XR\_002498915.1  
NM\_001353551.1 XM\_021847768.1  
NM\_001353602.2 XR\_002498898.1  
NM\_001353658.2 XM\_021843123.1  
NM\_001353666.2 XM\_001649999.2  
NM\_001353676.2 XM\_021850796.1

NM\_001353695.2 XM\_001656215.2  
NM\_001353715.2 XM\_021847649.1  
NM\_001353717.2 XR\_002502288.1  
NM\_001353734.2 XM\_001657501.3  
NM\_001353743.2 XM\_021851470.1  
NM\_001353776.2 XM\_021848767.1  
NM\_001353780.2 XM\_001649372.2  
NM\_001353824.2 XM\_021856618.1  
NM\_001353827.2 XM\_021843454.1  
NM\_001353829.2 XM\_021839025.1  
NM\_001353837.2 XM\_001657842.2  
NM\_001353881.2 XM\_021855269.1  
NM\_001353904.1 XM\_001656094.2  
NM\_001353924.2 XM\_021850515.1  
NM\_001353951.2 XM\_021844301.1  
NM\_001353985.2 XM\_021844256.1  
NM\_001353994.1 XM\_021848456.1  
NM\_001354001.3 XM\_001652868.2  
NM\_001354011.2 XM\_021843569.1  
NM\_001354024.2 XM\_021851622.1  
NM\_001354047.1 XM\_021846486.1  
NM\_001354096.2 XM\_021841646.1  
NM\_001354173.2 XR\_002500681.1  
NM\_001354260.2 XM\_001660941.2  
NM\_001354300.2 XM\_021854252.1  
NM\_001354315.2 XM\_001653648.2  
NM\_001354346.2 XM\_021851990.1  
NM\_001354392.2 XM\_021854761.1  
NM\_001354397.2 XM\_021852005.1  
NM\_001354398.2 XM\_021843595.1  
NM\_001354423.2 XM\_021840022.1  
NM\_001354424.2 XM\_021838209.1  
NM\_001354427.2 XM\_021843319.1  
NM\_001354460.2 XM\_001650621.2  
NM\_001354473.2 XR\_002500853.1  
NM\_001354476.2 XM\_021843051.1  
NM\_001354567.2 XM\_021843524.1  
NM\_001354579.2 XM\_021840602.1  
NM\_001354608.2 XR\_002499630.1  
NM\_001354619.2 XM\_021842728.1  
NM\_001354640.2 XM\_021843862.1  
NM\_001354690.3 XM\_021838760.1  
NM\_001354693.3 XR\_002498926.1  
NM\_001354698.2 XM\_021846296.1  
NM\_001354712.2 XM\_021843857.1  
NM\_001354727.2 XM\_001652893.2  
NM\_001354751.2 XM\_021839540.1  
NM\_001354779.2 XM\_001663017.2  
NM\_001354817.1 XM\_001656310.2  
NM\_001354932.2 XR\_002500946.1

NM\_001354934.2 XM\_021849153.1  
NM\_001354974.2 XM\_001656130.2  
NM\_001355001.2 XR\_002502329.1  
NM\_001355006.2 XM\_001658603.2  
NM\_001355276.2 XM\_021851324.1  
NM\_001355278.1 XM\_021846515.1  
NM\_001355465.2 XM\_021844428.1  
NM\_001356372.2 XM\_021843353.1  
NM\_001357943.2 XR\_002499142.1  
NM\_001358263.1 XM\_021851188.1  
NM\_001358345.2 XM\_021852478.1  
NM\_001359651.2 XM\_021849659.1  
NM\_001361.5 XM\_021851466.1  
NM\_001362481.2 XM\_021853750.1  
NM\_001362777.2 XM\_001651903.2  
NM\_001362787.2 XM\_021853047.1  
NM\_001362848.1 XM\_021839668.1  
NM\_001362872.2 XM\_021851233.1  
NM\_001362873.2 XM\_001661089.2  
NM\_001362926.2 XM\_001652894.2  
NM\_001362965.2 XM\_001650765.3  
NM\_001362988.2 XM\_021843053.1  
NM\_001363041.2 XM\_021852605.1  
NM\_001363046.2 XR\_002499338.1  
NM\_001363083.1 XM\_021856965.1  
NM\_001363104.2 XM\_021852623.1  
NM\_001363138.1 XM\_021852628.1  
NM\_001363343.2 XM\_021846024.1  
NM\_001363345.2 XM\_021850774.1  
NM\_001363366.1 XR\_002502946.1  
NM\_001363413.2 XM\_021839502.1  
NM\_001363447.2 XM\_021853797.1  
NM\_001363460.1 XM\_021844277.1  
NM\_001363514.2 XM\_001658576.2  
NM\_001363516.2 XM\_001650095.2  
NM\_001363518.2 XM\_021849715.1  
NM\_001363522.2 XM\_001654272.2  
NM\_001363539.2 XM\_021844412.1  
NM\_001363543.2 XM\_021844187.1  
NM\_001363578.1 XM\_021855734.1  
NM\_001363651.3 XM\_021838001.1  
NM\_001363655.2 XM\_021841703.1  
NM\_001363657.3 XM\_001661492.2  
NM\_001363699.2 XM\_001656055.2  
NM\_001363707.2 XM\_001659438.2  
NM\_001363737.2 XM\_021853786.1  
NM\_001363766.1 XM\_021843571.1  
NM\_001363794.2 XM\_021848107.1  
NM\_001363802.1 XR\_002502668.1  
NM\_001363816.2 XR\_002498912.1

NM\_001363875.2 XR\_002501626.1  
NM\_001363900.1 XM\_021843452.1  
NM\_001363914.1 XM\_001651230.2  
NM\_001363916.1 XM\_021846293.1  
NM\_001363964.1 XM\_021846105.1  
NM\_001363988.1 XM\_001653686.2  
NM\_001364021.1 XM\_001648644.2  
NM\_001364084.2 XM\_001654240.2  
NM\_001364159.2 XR\_002498828.1  
NM\_001364228.2 XM\_021857688.1  
NM\_001364245.2 XM\_001657215.2  
NM\_001364255.2 XM\_021846492.1  
NM\_001364393.2 XM\_001662049.3  
NM\_001364486.2 XM\_021850339.1  
NM\_001364520.2 XM\_021844533.1  
NM\_001364573.2 XM\_021852185.1  
NM\_001364681.2 XR\_002501627.1  
NM\_001364682.1 XM\_021846493.1  
NM\_001364818.2 XM\_021844616.1  
NM\_001365125.2 XM\_001650949.2  
NM\_001365156.1 XM\_021847383.1  
NM\_001365202.1 XM\_021844485.1  
NM\_001365203.1 XM\_021845596.1  
NM\_001365204.1 XR\_002500056.1  
NM\_001365208.1 XM\_021844833.1  
NM\_001365250.1 XM\_021850039.1  
NM\_001365252.1 XM\_021838151.1  
NM\_001365264.1 XM\_021839656.1  
NM\_001365373.1 XM\_021845473.1  
NM\_001365408.1 XM\_001656781.2  
NM\_001365496.2 XR\_002499005.1  
NM\_001365520.2 XM\_021847364.1  
NM\_001365598.3 XM\_021853553.1  
NM\_001365603.3 XM\_021855479.1  
NM\_001365634.1 XM\_021854471.1  
NM\_001365713.1 XM\_021842759.1  
NM\_001365717.1 XM\_001656935.2  
NM\_001365743.2 XM\_021856639.1  
NM\_001365768.2 XM\_001650920.2  
NM\_001365774.2 XM\_021846760.1  
NM\_001365779.1 XM\_021846556.1  
NM\_001365805.1 XM\_021856484.1  
NM\_001365835.2 XM\_021842632.1  
NM\_001365837.1 XR\_002499775.1  
NM\_001365855.1 XM\_021850923.1  
NM\_001365891.2 XM\_021842761.1  
NM\_001365902.3 XM\_001650881.2  
NM\_001365951.3 XM\_021856491.1  
NM\_001366086.1 XR\_002500464.1  
NM\_001366088.2 XR\_002499596.1



NM\_001366213.1 XR\_002501022.1  
NM\_001366253.2 XM\_021849692.1  
NM\_001366283.2 XM\_001655351.2  
NM\_001366361.1 XM\_001657307.2  
NM\_001366371.2 XM\_021837711.1  
NM\_001366473.2 XM\_021856227.1  
NM\_001366479.2 XM\_001648306.2  
NM\_001366501.2 XM\_021849766.1  
NM\_001366532.1 XM\_021845073.1  
NM\_001366545.2 XM\_001661314.2  
NM\_001366556.2 XM\_001664108.2  
NM\_001366570.1 XM\_021850539.1  
NM\_001366583.1 XR\_002500249.1  
NM\_001366586.1 XM\_001662998.2  
NM\_001366618.1 XM\_021843256.1  
NM\_001366682.2 XR\_002501143.1  
NM\_001366686.3 XM\_011494703.2  
NM\_001366779.1 XM\_021839027.1  
NM\_001366803.2 XM\_021849481.1  
NM\_001366993.1 XR\_002502386.1  
NM\_001367064.1 XM\_021852087.1  
NM\_001367360.2 XM\_021854102.1  
NM\_001367404.1 XM\_021850677.1  
NM\_001367424.1 XM\_021840853.1  
NM\_001367460.1 XM\_021841072.1  
NM\_001367461.1 XM\_021843908.1  
NM\_001367462.1 XR\_002500084.1  
NM\_001367510.1 XM\_001648408.2  
NM\_001367517.1 XM\_001654349.2  
NM\_001367561.1 XM\_001653701.2  
NM\_001367569.1 XM\_021850748.1  
NM\_001367570.1 XM\_001663625.2  
NM\_001367600.2 XM\_001661587.2  
NM\_001367645.1 XM\_001659844.2  
NM\_001367651.1 XM\_021844369.1  
NM\_001367691.1 XM\_021851347.1  
NM\_001367737.1 XM\_001652340.2  
NM\_001367747.1 XR\_002499400.1  
NM\_001367753.1 XR\_002500236.1  
NM\_001367791.1 XM\_021848037.1  
NM\_001367797.1 XM\_021850734.1  
NM\_001367810.1 XM\_001648803.2  
NM\_001367842.1 XR\_002502653.1  
NM\_001367850.1 XM\_021843253.1  
NM\_001367851.1 XM\_021842915.1  
NM\_001367856.1 XM\_021854321.1  
NM\_001367860.1 XM\_001662654.2  
NM\_001367872.1 XM\_021855622.1  
NM\_001367873.1 XM\_021843677.1  
NM\_001367895.1 XM\_021850701.1

NM\_001367897.1 XR\_002502415.1  
NM\_001367904.1 XM\_021837318.1  
NM\_001367915.1 XM\_001651037.2  
NM\_001367968.1 XM\_001653891.2  
NM\_001367975.1 XM\_001663743.2  
NM\_001368066.1 XM\_021846871.1  
NM\_001368275.1 XM\_021843695.1  
NM\_001368324.2 XM\_021852433.1  
NM\_001368888.2 XR\_002500643.1  
NM\_001368900.2 XR\_002503178.1  
NM\_001368906.2 XM\_021838793.1  
NM\_001368921.2 XM\_021845858.1  
NM\_001369044.1 XM\_021853769.1  
NM\_001369110.1 XR\_002501817.1  
NM\_001369256.1 XM\_021856662.1  
NM\_001369401.1 XM\_021838013.1  
NM\_001369406.2 XM\_001648419.2  
NM\_001369468.1 XM\_021852386.1  
NM\_001369486.1 XM\_021850063.1  
NM\_001369495.1 XM\_021839609.1  
NM\_001369512.1 XM\_001662350.2  
NM\_001369523.1 XM\_021841425.1  
NM\_001369542.1 XR\_002501512.1  
NM\_001369551.1 XM\_021850209.1  
NM\_001369578.1 XM\_021846436.1  
NM\_001369579.1 XM\_001655075.3  
NM\_001369580.1 XM\_021845860.1  
NM\_001369583.1 XM\_021850362.1  
NM\_001369600.1 XM\_001648795.2  
NM\_001369639.1 XM\_001661594.3  
NM\_001369644.1 XR\_002501983.1  
NM\_001369672.1 XM\_021842880.1  
NM\_001369703.1 XM\_021839802.1  
NM\_001369788.1 XM\_001657539.2  
NM\_001369799.1 XM\_021843387.1  
NM\_001369821.1 XM\_001650334.2  
NM\_001369864.1 XM\_001660596.2  
NM\_001369917.1 XM\_001658114.2  
NM\_001369920.1 XM\_021844102.1  
NM\_001369930.1 XM\_021849237.1  
NM\_001370076.1 XM\_021846020.1  
NM\_001370085.1 XM\_001655165.2  
NM\_001370104.2 XM\_021848197.1  
NM\_001370113.2 XM\_021839563.1  
NM\_001370126.1 XM\_021848102.1  
NM\_001370136.1 XM\_021838446.1  
NM\_001370153.1 XM\_021844449.1  
NM\_001370167.1 XR\_002498845.1  
NM\_001370202.1 XM\_021852647.1  
NM\_001370221.1 XM\_021845637.1

NM\_001370237.1 XM\_021854579.1  
NM\_001370260.1 XM\_001654324.2  
NM\_001370261.1 XM\_001654170.2  
NM\_001370271.1 XM\_021849228.1  
NM\_001370317.1 XM\_021847650.1  
NM\_001370348.2 XM\_021853273.1  
NM\_001370367.1 XM\_021845643.1  
NM\_001370403.1 XM\_001651395.2  
NM\_001370426.1 XM\_001650877.2  
NM\_001370432.1 XM\_001658309.2  
NM\_001370461.1 XM\_001654871.2  
NM\_001370467.1 XR\_002500145.1  
NM\_001370501.1 XM\_021852648.1  
NM\_001370532.1 XM\_001652650.2  
NM\_001370533.1 XM\_021839795.1  
NM\_001370554.1 XM\_001662670.2  
NM\_001370567.1 XM\_021845138.1  
NM\_001370588.1 XM\_021847268.1  
NM\_001370608.1 XM\_021843172.1  
NM\_001370639.1 XR\_002499865.1  
NM\_001370649.1 XM\_021837331.1  
NM\_001370652.1 XM\_021850056.1  
NM\_001370687.1 XM\_021839188.1  
NM\_001371009.1 XM\_021845647.1  
NM\_001371075.1 XR\_002502440.1  
NM\_001371128.1 XM\_001654718.2  
NM\_001371137.1 XM\_021849229.1  
NM\_001371138.1 XM\_021852105.1  
NM\_001371168.1 XM\_001656037.2  
NM\_001371206.1 XM\_021839584.1  
NM\_001371210.1 XM\_021842062.1  
NM\_001371215.1 XR\_002502634.1  
NM\_001371216.1 XM\_021857428.1  
NM\_001371217.1 XR\_002501222.1  
NM\_001371237.1 XM\_001662175.2  
NM\_001371251.1 XM\_001655598.2  
NM\_001371328.1 XR\_002500067.1  
NM\_001371332.1 XM\_021849473.1  
NM\_001371333.1 XM\_001653265.2  
NM\_001371335.1 XM\_021848848.1  
NM\_001371350.1 XM\_021847029.1  
NM\_001371355.1 XM\_021844936.1  
NM\_001371362.1 XM\_001651704.2  
NM\_001371389.2 XM\_021857206.1  
NM\_001371410.1 XM\_001663709.2  
NM\_001371427.1 XM\_021850629.1  
NM\_001371445.1 XM\_001655806.2  
NM\_001371452.1 XM\_021843386.1  
NM\_001371589.1 XM\_021849243.1  
NM\_001371592.1 XM\_021845570.1

NM\_001371740.1 XR\_002501674.1  
NM\_001371774.1 XR\_002499206.1  
NM\_001371858.3 XM\_021852203.1  
NM\_001371923.1 XM\_001650831.2  
NM\_001371936.1 XM\_021854438.1  
NM\_001372024.1 XM\_021853567.1  
NM\_001372025.1 XM\_001648677.3  
NM\_001372070.1 XM\_021854519.1  
NM\_001372080.1 XM\_001663110.2  
NM\_001372167.1 XM\_021838447.1  
NM\_001372189.1 XM\_001660365.2  
NM\_001374256.1 XM\_021837943.1  
NM\_001374264.2 XM\_001649766.2  
NM\_001374269.1 XM\_021846715.1  
NM\_001374357.1 XM\_001652321.2  
NM\_001374523.1 XM\_021851570.1  
NM\_001374596.1 XR\_002502950.1  
NM\_001374781.1 XM\_021845661.1  
NM\_001374824.1 XM\_021854627.1  
NM\_001374847.1 XM\_021843465.1  
NM\_001374868.1 XR\_002499086.1  
NM\_001375286.1 XM\_021845620.1  
NM\_001375291.1 XM\_021850389.1  
NM\_001375296.1 XM\_021857204.1  
NM\_001375299.1 XM\_001661561.2  
NM\_001375321.1 XM\_021843986.1  
NM\_001375330.1 XR\_002498802.1  
NM\_001375334.1 XM\_021840130.1  
NM\_001375353.1 XR\_002502827.1  
NM\_001375360.1 XM\_021843373.1  
NM\_001375411.1 XR\_002499265.1  
NM\_001375444.1 XM\_001654388.2  
NM\_001375463.1 XR\_002498914.1  
NM\_001375467.1 XM\_001648892.3  
NM\_001375468.1 XM\_021848560.1  
NM\_001375477.1 XM\_021848031.1  
NM\_001375491.1 XM\_001655100.3  
NM\_001375492.1 XM\_021850891.1  
NM\_001375554.1 XM\_021843618.1  
NM\_001375575.1 XM\_001658031.2  
NM\_001375583.1 XM\_021844279.1  
NM\_001375585.1 XM\_021852679.1  
NM\_001375589.2 XM\_001660720.2  
NM\_001375618.1 XM\_001659751.2  
NM\_001375630.1 XM\_001648227.2  
NM\_001375651.1 XM\_021856517.1  
NM\_001375655.1 XM\_021846590.1  
NM\_001375673.1 XM\_001663136.2  
NM\_001375697.1 XM\_021850442.1  
NM\_001375705.1 XR\_002500702.1

NM\_001375720.1 XM\_021851346.1  
NM\_001375725.1 XM\_001649342.2  
NM\_001375741.1 XM\_021849762.1  
NM\_001375756.1 XM\_001651334.2  
NM\_001375780.1 XR\_002500555.1  
NM\_001375845.1 XM\_001648782.2  
NM\_001375897.1 XM\_001654325.2  
NM\_001375908.1 XM\_021853373.1  
NM\_001375939.1 XM\_021843336.1  
NM\_001375968.1 XM\_001659499.2  
NM\_001376068.1 XM\_021847145.1  
NM\_001376085.1 XR\_002500039.1  
NM\_001376112.1 XM\_021847010.1  
NM\_001376119.1 XM\_011495451.2  
NM\_001376131.1 XM\_001655795.2  
NM\_001376132.1 XM\_021843453.1  
NM\_001376150.1 XM\_021856870.1  
NM\_001376153.1 XM\_001652759.2  
NM\_001376157.1 XM\_021856852.1  
NM\_001376161.1 XM\_021843693.1  
NM\_001376248.1 XM\_021845124.1  
NM\_001376251.1 XM\_021848744.1  
NM\_001376253.1 XM\_021840576.1  
NM\_001376323.2 XM\_021848252.1  
NM\_001376342.1 XM\_021838107.1  
NM\_001376351.1 XM\_001660504.2  
NM\_001376354.1 XM\_021844704.1  
NM\_001376364.1 XR\_002501247.1  
NM\_001376379.1 XR\_002501660.1  
NM\_001376443.1 XR\_002500388.1  
NM\_001376446.1 XM\_021848610.1  
NM\_001376450.1 XM\_021849257.1  
NM\_001376483.1 XM\_021850383.1  
NM\_001376523.1 XR\_002501014.1  
NM\_001376529.1 XM\_001649558.2  
NM\_001376543.1 XR\_002503139.1  
NM\_001376580.1 XM\_021848704.1  
NM\_001376591.1 XM\_021837390.1  
NM\_001376616.1 XM\_021843756.1  
NM\_001376619.1 XM\_021855577.1  
NM\_001376625.1 XR\_002499947.1  
NM\_001376639.1 XM\_021839197.1  
NM\_001376654.1 XR\_002502770.1  
NM\_001376682.1 XM\_021844427.1  
NM\_001376690.1 XM\_021852256.1  
NM\_001376696.1 XM\_021839593.1  
NM\_001376725.1 XM\_021843839.1  
NM\_001376726.1 XM\_021840825.1  
NM\_001376728.1 XM\_001648038.3  
NM\_001376783.1 XM\_021850635.1

NM\_001376793.1 XM\_001652352.2  
NM\_001376817.1 XM\_021848030.1  
NM\_001376821.1 XM\_021856853.1  
NM\_001376844.1 XM\_021847998.1  
NM\_001376887.1 XR\_002500317.1  
NM\_001376932.1 XM\_021843326.1  
NM\_001377062.1 XR\_002499339.1  
NM\_001377129.1 XM\_021842066.1  
NM\_001377130.1 XM\_001662711.2  
NM\_001377173.1 XM\_001652497.2  
NM\_001377174.1 XM\_001653655.2  
NM\_001377178.1 XM\_021846386.1  
NM\_001377198.1 XM\_021841419.1  
NM\_001377203.1 XM\_001662420.2  
NM\_001377204.1 XM\_001658588.2  
NM\_001377208.1 XM\_001659727.2  
NM\_001377212.1 XM\_001649902.2  
NM\_001377228.1 XM\_021848253.1  
NM\_001377238.1 XM\_001648586.2  
NM\_001377291.1 XM\_001652734.2  
NM\_001377317.2 XM\_021837654.1  
NM\_001377358.1 XM\_001659414.2  
NM\_001377362.1 XM\_001652002.2  
NM\_001377377.1 XR\_002500921.1  
NM\_001377379.1 XR\_002503191.1  
NM\_001377394.1 XM\_021847972.1  
NM\_001377405.1 XM\_021844177.1  
NM\_001377408.1 XM\_001651067.2  
NM\_001377411.1 XM\_001651278.2  
NM\_001377418.1 XM\_021844350.1  
NM\_001377427.1 XM\_001659705.2  
NM\_001377470.1 XM\_001659534.2  
NM\_001377491.1 XM\_021849191.1  
NM\_001377492.1 XM\_021849226.1  
NM\_001377496.1 XR\_002498596.1  
NM\_001377931.1 XR\_002503221.1  
NM\_001377961.1 XM\_021839381.1  
NM\_001377970.1 XM\_001659407.2  
NM\_001377974.1 XM\_001659597.2  
NM\_001378029.1 XM\_021851874.1  
NM\_001378034.1 XM\_001659623.2  
NM\_001378074.1 XM\_021842607.1  
NM\_001378077.1 XM\_021844432.1  
NM\_001378092.1 XM\_021846584.1  
NM\_001378094.1 XM\_021838159.1  
NM\_001378102.1 XM\_021839947.1  
NM\_001378107.1 XM\_021846615.1  
NM\_001378132.1 XM\_021844818.1  
NM\_001378144.1 XM\_021854439.1  
NM\_001378152.1 XM\_021840035.1

NM\_001378157.1 XM\_001659263.2  
NM\_001378178.1 XM\_021851787.1  
NM\_001378181.1 XM\_021848237.1  
NM\_001378254.1 XM\_021851747.1  
NM\_001378257.1 XR\_002502338.1  
NM\_001378270.1 XM\_021847213.1  
NM\_001378408.1 XM\_021855655.1  
NM\_001378456.1 XM\_021840906.1  
NM\_001378485.1 XR\_002498653.1  
NM\_001378486.1 XR\_002499682.1  
NM\_001378533.1 XM\_021848562.1  
NM\_001378538.1 XM\_021854763.1  
NM\_001378546.1 XM\_021838015.1  
NM\_001378851.1 XM\_001651595.2  
NM\_001379104.1 XR\_002500928.1  
NM\_001379331.1 XM\_021849474.1  
NM\_001379461.1 XM\_021850567.1  
NM\_001379515.1 XM\_001649607.2  
NM\_001379551.1 XM\_001651347.2  
NM\_001379566.1 XR\_002499839.1  
NM\_001379610.1 XM\_021853753.1  
NM\_001379614.1 XM\_021850839.1  
NM\_001381865.2 XM\_021845566.1  
NM\_001381886.1 XR\_002498655.1  
NM\_001381939.1 XM\_021844174.1  
NM\_001381941.1 XM\_021854798.1  
NM\_001381949.1 XR\_002498677.1  
NM\_001382242.1 XR\_002502961.1  
NM\_001382287.1 XM\_021843352.1  
NM\_001382288.1 XM\_021854799.1  
NM\_001382310.1 XM\_001651499.2  
NM\_001382339.1 XM\_021844803.1  
NM\_001382396.1 XM\_001654171.2  
NM\_001382408.1 XM\_021840590.1  
NM\_001382424.1 XM\_021850233.1  
NM\_001382429.1 XM\_001656688.2  
NM\_001382467.1 XM\_021850680.1  
NM\_001382470.1 XR\_002503204.1  
NM\_001382527.1 XM\_001663502.2  
NM\_001382528.1 XM\_021854444.1  
NM\_001382554.1 XM\_021855572.1  
NM\_001382573.1 XR\_002503177.1  
NM\_001382611.1 XM\_001653206.2  
NM\_001382616.1 XM\_021857284.1  
NM\_001382619.1 XM\_021855728.1  
NM\_001382628.1 XM\_021852373.1  
NM\_001382634.1 XM\_021855018.1  
NM\_001382639.1 XM\_021841708.1  
NM\_001382645.1 XM\_021839504.1  
NM\_001382652.1 XM\_021849392.1

NM\_001382674.1 XM\_001654441.2  
NM\_001382696.1 XM\_021850385.1  
NM\_001382707.1 XM\_021839246.1  
NM\_001382722.1 XM\_021843173.1  
NM\_001382730.1 XR\_002499063.1  
NM\_001382740.1 XM\_001653663.2  
NM\_001382767.1 XM\_001660717.2  
NM\_001382787.1 XM\_021842604.1  
NM\_001384133.1 XM\_021844614.1  
NM\_001384268.1 XM\_021852516.1  
NM\_001384339.1 XM\_021838841.1  
NM\_001384350.1 XM\_021843356.1  
NM\_001384356.1 XM\_021847118.1  
NM\_001384369.1 XM\_001654856.2  
NM\_001384387.1 XM\_021842051.1  
NM\_001384390.1 XM\_001656810.2  
NM\_001384401.1 XM\_021843234.1  
NM\_001384404.1 XM\_001653623.3  
NM\_001384414.1 XR\_002501132.1  
NM\_001384420.1 XM\_021851901.1  
NM\_001384445.1 XR\_002501148.1  
NM\_001384459.1 XM\_001653684.2  
NM\_001384464.1 XR\_002502133.1  
NM\_001384488.1 XM\_021851810.1  
NM\_001384508.1 XR\_002499449.1  
NM\_001384513.1 XM\_001655688.2  
NM\_001384526.1 XM\_021842760.1  
NM\_001384534.1 XM\_021843694.1  
NM\_001384537.1 XM\_021842021.1  
NM\_001384538.1 XR\_002503163.1  
NM\_001384554.1 XM\_001660818.2  
NM\_001384572.1 XM\_001651802.3  
NM\_001384576.1 XM\_021851876.1  
NM\_001384582.1 XM\_021849161.1  
NM\_001384682.1 XM\_001660729.2  
NM\_001384704.1 XM\_021849343.1  
NM\_001384707.1 XR\_002501137.1  
NM\_001384708.1 XM\_021845005.1  
NM\_001384713.1 XM\_001655480.2  
NM\_001384734.1 XR\_002502748.1  
NM\_001384745.1 XM\_001660649.2  
NM\_001384778.1 XM\_021850395.1  
NM\_001384809.1 XR\_002500984.1  
NM\_001384851.1 XM\_001658593.3  
NM\_001384866.1 XM\_001657780.2  
NM\_001384867.1 XM\_021847435.1  
NM\_001384882.1 XM\_021840391.1  
NM\_001384892.1 XM\_021845253.1  
NM\_001384898.1 XM\_021853833.1  
NM\_001384900.1 XR\_002501215.1



NM\_001384936.1 XM\_021852649.1  
NM\_001384988.1 XM\_021848032.1  
NM\_001384993.1 XM\_021850426.1  
NM\_001384995.1 XM\_001660837.2  
NM\_001385010.1 XM\_021843475.1  
NM\_001385017.1 XR\_002499787.1  
NM\_001385028.1 XM\_021837825.1  
NM\_001385029.1 XM\_001648655.2  
NM\_001385072.1 XM\_021842100.1  
NM\_001385084.1 XR\_002502470.1  
NM\_001385086.1 XM\_021840732.1  
NM\_001385093.1 XM\_021842902.1  
NM\_001385110.1 XM\_001661245.2  
NM\_001385111.1 XM\_021855180.1  
NM\_001385116.1 XR\_002503216.1  
NM\_001385146.1 XM\_021852476.1  
NM\_001385177.1 XM\_021857155.1  
NM\_001385195.1 XM\_021856159.1  
NM\_001385217.1 XM\_001650214.2  
NM\_001385218.1 XM\_021853681.1  
NM\_001385245.1 XM\_021844103.1  
NM\_001385251.1 XM\_001656041.2  
NM\_001385258.1 XM\_021839589.1  
NM\_001385259.1 XM\_021844411.1  
NM\_001385274.1 XM\_001658056.2  
NM\_001385292.1 XM\_001657034.2  
NM\_001385321.1 XR\_002501773.1  
NM\_001385341.1 XR\_002501794.1  
NM\_001385348.1 XM\_021856523.1  
NM\_001385351.1 XM\_021840915.1  
NM\_001385354.1 XM\_021853148.1  
NM\_001385361.1 XM\_001654123.2  
NM\_001385368.1 XR\_002500172.1  
NM\_001385374.1 XM\_021853678.1  
NM\_001385426.1 XM\_021849975.1  
NM\_001385429.1 XM\_021855692.1  
NM\_001385444.1 XM\_021848429.1  
NM\_001385463.1 XM\_001660758.2  
NM\_001385478.1 XM\_021848225.1  
NM\_001385491.1 XM\_001652606.2  
NM\_001385509.1 XM\_021846156.1  
NM\_001385531.1 XM\_021851186.1  
NM\_001385551.1 XM\_021848743.1  
NM\_001385558.1 XM\_011495301.2  
NM\_001385618.1 XM\_021854227.1  
NM\_001385621.1 XM\_021851399.1  
NM\_001385673.1 XM\_001661400.2  
NM\_001385676.1 XR\_002499119.1  
NM\_001385689.1 XM\_001663611.2  
NM\_001385693.1 XM\_021847437.1

NM\_001385703.1 XM\_021847520.1  
NM\_001385705.1 XM\_001663921.2  
NM\_001385730.1 XM\_001653240.2  
NM\_001385735.1 XM\_021838211.1  
NM\_001385748.1 XM\_021840261.1  
NM\_001385757.1 XR\_002501515.1  
NM\_001385769.1 XM\_001651775.2  
NM\_001385778.1 XM\_021852847.1  
NM\_001385784.1 XM\_021850994.1  
NM\_001385792.1 XM\_001656277.2  
NM\_001385809.1 XM\_021850441.1  
NM\_001385812.1 XM\_021848688.1  
NM\_001385821.1 XM\_021848322.1  
NM\_001385883.1 XM\_001653985.2  
NM\_001385905.1 XM\_021854498.1  
NM\_001385913.1 XM\_021850354.1  
NM\_001385947.1 XM\_021841963.1  
NM\_001385967.1 XR\_002500955.1  
NM\_001385997.1 XM\_021842236.1  
NM\_001386004.1 XM\_021843753.1  
NM\_001386015.1 XM\_021852670.1  
NM\_001386019.1 XM\_021844992.1  
NM\_001386027.1 XM\_001653727.2  
NM\_001386032.1 XM\_021854142.1  
NM\_001386084.1 XM\_001648445.2  
NM\_001386095.1 XR\_002500627.1  
NM\_001386139.1 XM\_021854370.1  
NM\_001386141.1 XM\_021844178.1  
NM\_001386146.1 XM\_021846184.1  
NM\_001386191.1 XM\_021850175.1  
NM\_001386193.1 XM\_001652150.2  
NM\_001386198.1 XM\_001659354.2  
NM\_001386208.1 XR\_002502887.1  
NM\_001386290.1 XM\_021844813.1  
NM\_001386425.1 XM\_021846895.1  
NM\_001386430.1 XM\_001652293.2  
NM\_001386441.1 XM\_021855978.1  
NM\_001386462.1 XR\_002498737.1  
NM\_001386585.1 XM\_021851144.1  
NM\_001386608.1 XM\_001663038.2  
NM\_001386609.1 XM\_001655895.2  
NM\_001386677.1 XM\_021839662.1  
NM\_001386682.1 XM\_001661866.2  
NM\_001386793.1 XM\_021854022.1  
NM\_001386901.1 XM\_001652130.2  
NM\_001386929.1 XM\_021845599.1  
NM\_001386934.1 XM\_021841637.1  
NM\_001386968.1 XM\_021857440.1  
NM\_001386978.1 XR\_002498738.1  
NM\_001387002.1 XM\_021842336.1

NM\_001387009.1 XM\_021846142.1  
NM\_001387053.1 XM\_021844990.1  
NM\_001387063.1 XM\_021844988.1  
NM\_001387067.1 XR\_002502188.1  
NM\_001387096.1 XM\_021838669.1  
NM\_001387097.1 XM\_001653912.2  
NM\_001387102.1 XM\_001664122.2  
NM\_001387112.1 XM\_021844179.1  
NM\_001387119.1 XR\_002500539.1  
NM\_001387138.1 XM\_021848751.1  
NM\_001387195.1 XR\_002503263.1  
NM\_001387206.1 XM\_021854358.1  
NM\_001387230.1 XM\_021851148.1  
NM\_001387260.1 XM\_001649850.2  
NM\_001387272.1 XM\_021841961.1  
NM\_001387302.1 XM\_021852846.1  
NM\_001387303.1 XM\_021847018.1  
NM\_001387308.1 XM\_001651473.2  
NM\_001387317.1 XM\_021850806.1  
NM\_001387318.1 XR\_002499340.1  
NM\_001387320.1 XM\_001657890.2  
NM\_001387347.1 XM\_021844334.1  
NM\_001387379.1 XM\_001655370.2  
NM\_001387401.1 XM\_021843707.1  
NM\_001387412.1 XM\_001654136.2  
NM\_001387418.1 XM\_021852068.1  
NM\_001387446.1 XM\_021848111.1  
NM\_001387481.1 XM\_001654210.2  
NM\_001387490.1 XM\_001652234.2  
NM\_001387501.1 XM\_021845022.1  
NM\_001387505.1 XM\_001651929.2  
NM\_001387526.1 XM\_001648519.2  
NM\_001387562.1 XM\_001661204.2  
NM\_001387569.1 XM\_021844046.1  
NM\_001387598.1 XM\_021855139.1  
NM\_001387623.1 XM\_021854125.1  
NM\_001387650.1 XM\_021837914.1  
NM\_001387652.1 XR\_002502150.1  
NM\_001387663.1 XM\_021850328.1  
NM\_001387697.1 XM\_021853606.1  
NM\_001387762.1 XM\_021849693.1  
NM\_001387777.1 XM\_021853455.1  
NM\_001387780.1 XM\_021842342.1  
NM\_001387794.1 XR\_002500740.1  
NM\_001387813.1 XR\_002501271.1  
NM\_001387821.1 XR\_002499261.1  
NM\_001387856.1 XM\_001659225.2  
NM\_001387862.1 XM\_021837921.1  
NM\_001387919.1 XM\_021842739.1  
NM\_001387940.1 XM\_021857104.1

NM\_001387960.1 XM\_001649090.2  
NM\_001387968.1 XM\_021852093.1  
NM\_001387971.1 XM\_021857459.1  
NM\_001387976.1 XM\_021838767.1  
NM\_001387984.1 XM\_021854357.1  
NM\_001388001.1 XM\_021844101.1  
NM\_001388009.1 XR\_002500098.1  
NM\_001388013.1 XM\_011495296.2  
NM\_001388042.1 XM\_021840327.1  
NM\_001388043.1 XM\_001657189.2  
NM\_001388083.1 XM\_021857315.1  
NM\_001388091.1 XM\_021857501.1  
NM\_001388109.1 XM\_021854027.1  
NM\_001388111.1 XM\_021849297.1  
NM\_001388118.1 XM\_001654951.2  
NM\_001388127.1 XM\_001655001.2  
NM\_001388133.1 XM\_021846235.1  
NM\_001388137.1 XM\_021849851.1  
NM\_001388151.1 XM\_021855689.1  
NM\_001388165.1 XM\_021838213.1  
NM\_001388167.1 XR\_002501070.1  
NM\_001388171.1 XM\_021847517.1  
NM\_001388188.1 XM\_001655954.2  
NM\_001388191.1 XM\_021857280.1  
NM\_001388200.1 XM\_021854554.1  
NM\_001388215.1 XM\_001651906.2  
NM\_001388223.1 XM\_021855694.1  
NM\_001388235.1 XM\_021848314.1  
NM\_001388256.1 XM\_021845477.1  
NM\_001388265.1 XM\_021841116.1  
NM\_001388269.1 XM\_021840416.1  
NM\_001388285.1 XM\_001650260.2  
NM\_001388288.1 XR\_002502722.1  
NM\_001388300.1 XM\_001660397.2  
NM\_001388306.1 XR\_002500575.1  
NM\_001388358.1 XM\_021847556.1  
NM\_001388380.1 XM\_001654726.2  
NM\_001388391.1 XM\_001657155.3  
NM\_001388401.1 XM\_021845006.1  
NM\_001388410.1 XM\_021840098.1  
NM\_001388427.1 XM\_021841319.1  
NM\_001388496.1 XM\_021843527.1  
NM\_001396.5 XM\_021849152.1  
NM\_001399.5 XR\_002502744.1  
NM\_001405.4 XM\_001653709.2  
NM\_001458.5 XM\_021856679.1  
NM\_001464.5 XR\_002501427.1  
NM\_001487.3 XM\_021846537.1  
NM\_001521.4 XM\_021856274.1  
NM\_001535.5 XM\_021854631.1

|             |                |
|-------------|----------------|
| NM_001545.3 | XM_001663633.2 |
| NM_001546.4 | XM_001659878.2 |
| NM_001556.3 | XM_021857643.1 |
| NM_001605.3 | XM_001661756.2 |
| NM_001618.4 | XM_001656424.2 |
| NM_001619.5 | XR_002500970.1 |
| NM_001640.4 | XM_021850903.1 |
| NM_001669.4 | XR_002501098.1 |
| NM_001674.4 | XM_021839941.1 |
| NM_001718.6 | XM_021844978.1 |
| NM_001729.4 | XM_001648346.2 |
| NM_001731.3 | XM_001661212.2 |
| NM_001741.3 | XM_001658813.2 |
| NM_001745.4 | XM_021845038.1 |
| NM_001834.5 | XM_001660393.2 |
| NM_001858.6 | XM_021837698.1 |
| NM_001876.4 | XM_001651070.2 |
| NM_001895.4 | XM_021847655.1 |
| NM_001939.3 | XM_021842284.1 |
| NM_001951.4 | XM_001649124.2 |
| NM_001966.4 | XM_001648252.2 |
| NM_001988.4 | XM_021850926.1 |
| NM_001992.5 | XM_021844020.1 |
| NM_001997.5 | XM_001659901.2 |
| NM_002040.4 | XM_001662483.2 |
| NM_002086.5 | XM_021842560.1 |
| NM_002092.4 | XM_021857105.1 |
| NM_002122.5 | XM_021840100.1 |
| NM_002127.6 | XM_021849661.1 |
| NM_002188.3 | XM_021849980.1 |
| NM_002235.4 | XM_021849483.1 |
| NM_002241.5 | XM_021844941.1 |
| NM_002258.3 | XM_021848315.1 |
| NM_002262.5 | XM_021854835.1 |
| NM_002264.4 | XM_021848822.1 |
| NM_002279.5 | XM_001648840.2 |
| NM_002317.7 | XM_001651584.3 |
| NM_002346.3 | XM_001647885.2 |
| NM_002348.4 | XM_021849274.1 |
| NM_002360.4 | XM_021844335.1 |
| NM_002362.4 | XM_001658173.2 |
| NM_002376.7 | XM_021846037.1 |
| NM_002383.4 | XM_021850461.1 |
| NM_002390.6 | XM_011494854.2 |
| NM_002409.5 | XM_001655197.2 |
| NM_002420.6 | XM_021852786.1 |
| NM_002441.5 | XM_021848049.1 |
| NM_002446.4 | XM_021845929.1 |
| NM_002449.5 | XM_021848547.1 |
| NM_002470.4 | XM_021844974.1 |

|             |                |
|-------------|----------------|
| NM_002477.1 | XR_002502584.1 |
| NM_002478.5 | XR_002499986.1 |
| NM_002483.7 | XM_021843089.1 |
| NM_002514.4 | XM_021840211.1 |
| NM_002522.4 | XR_002500712.1 |
| NM_002525.3 | XM_021839940.1 |
| NM_002537.3 | XM_021854258.1 |
| NM_002597.5 | XM_001647887.2 |
| NM_002599.5 | XM_021848050.1 |
| NM_002612.4 | XM_021839752.1 |
| NM_002622.5 | XR_002501953.1 |
| NM_002638.4 | XM_021849001.1 |
| NM_002653.5 | XM_001648946.2 |
| NM_002666.5 | XM_021848036.1 |
| NM_002674.4 | XM_021838507.1 |
| NM_002691.4 | XM_021852291.1 |
| NM_002715.4 | XM_021855122.1 |
| NM_002783.3 | XM_021843166.1 |
| NM_002795.4 | XM_021839789.1 |
| NM_002803.4 | XM_001655221.2 |
| NM_002813.7 | XR_002498905.1 |
| NM_002841.4 | XM_021855690.1 |
| NM_002853.4 | XM_021840213.1 |
| NM_002885.4 | XM_001663117.2 |
| NM_002951.5 | XM_001658160.2 |
| NM_002956.3 | XM_011495461.2 |
| NM_003035.2 | XM_021843174.1 |
| NM_003053.4 | XM_021856963.1 |
| NM_003096.4 | XM_021848526.1 |
| NM_003124.5 | XR_002501917.1 |
| NM_003141.4 | XM_021838160.1 |
| NM_003149.3 | XM_001657791.2 |
| NM_003155.3 | XM_021840234.1 |
| NM_003171.5 | XM_021856061.1 |
| NM_003203.5 | XM_001662026.2 |
| NM_003238.6 | XM_021845255.1 |
| NM_003250.6 | XM_021853464.1 |
| NM_003254.3 | XM_021855511.1 |
| NM_003265.3 | XM_011494866.2 |
| NM_003274.5 | XM_001663294.2 |
| NM_003278.3 | XM_001655092.2 |
| NM_003313.4 | XM_021850166.1 |
| NM_003319.4 | XM_021840380.1 |
| NM_003324.5 | XM_021850927.1 |
| NM_003331.5 | XM_021842777.1 |
| NM_003347.4 | XM_021845688.1 |
| NM_003377.5 | XM_001663929.2 |
| NM_003392.7 | XM_021837287.1 |
| NM_003407.5 | XM_021837257.1 |
| NM_003409.5 | XM_021846026.1 |

|             |                |
|-------------|----------------|
| NM_003445.4 | XM_021845090.1 |
| NM_003446.4 | XM_001648386.2 |
| NM_003490.4 | XM_001648254.2 |
| NM_003503.4 | XR_002502127.1 |
| NM_003504.5 | XM_001658214.2 |
| NM_003510.3 | XM_001654682.3 |
| NM_003514.2 | XM_021844520.1 |
| NM_003569.3 | XM_001648152.2 |
| NM_003610.4 | XM_021852929.1 |
| NM_003617.4 | XM_021849976.1 |
| NM_003633.4 | XM_001656237.2 |
| NM_003639.4 | XM_021843938.1 |
| NM_003645.4 | XM_021842793.1 |
| NM_003654.6 | XR_002502045.1 |
| NM_003670.3 | XM_021854445.1 |
| NM_003702.4 | XM_021854748.1 |
| NM_003710.4 | XM_021857290.1 |
| NM_003735.3 | XM_021847937.1 |
| NM_003799.3 | XM_021846351.1 |
| NM_003812.4 | XM_021847944.1 |
| NM_003854.4 | XM_021848375.1 |
| NM_003884.5 | XM_021852876.1 |
| NM_003907.3 | XR_002499941.1 |
| NM_003948.5 | XM_001648247.2 |
| NM_003959.3 | XM_021844104.1 |
| NM_003963.3 | XM_021857521.1 |
| NM_003974.4 | XM_021853352.1 |
| NM_003981.4 | XR_002502802.1 |
| NM_003989.5 | XM_021848388.1 |
| NM_003992.5 | XM_001655130.2 |
| NM_004000.3 | XM_001649911.2 |
| NM_004010.3 | XM_001662529.2 |
| NM_004039.3 | XM_021851683.1 |
| NM_004041.5 | XM_021851941.1 |
| NM_004052.3 | XM_021856774.1 |
| NM_004061.5 | XR_002500429.1 |
| NM_004091.4 | XM_021854834.1 |
| NM_004094.5 | XM_021857647.1 |
| NM_004111.6 | XM_021847938.1 |
| NM_004112.4 | XM_021855252.1 |
| NM_004137.4 | XR_002499494.1 |
| NM_004145.4 | XM_001662763.2 |
| NM_004196.7 | XM_021854247.1 |
| NM_004197.2 | XM_021854790.1 |
| NM_004206.4 | XM_001652376.2 |
| NM_004208.4 | XM_021850402.1 |
| NM_004213.5 | XM_021845847.1 |
| NM_004214.5 | XM_021839510.1 |
| NM_004236.4 | XM_021844626.1 |
| NM_004246.3 | XM_011495283.2 |

|             |                |
|-------------|----------------|
| NM_004254.4 | XM_021845230.1 |
| NM_004257.6 | XM_001655560.2 |
| NM_004279.3 | XM_021848446.1 |
| NM_004316.4 | XM_021845577.1 |
| NM_004326.4 | XM_021841197.1 |
| NM_004354.3 | XM_021847003.1 |
| NM_004359.2 | XM_021848447.1 |
| NM_004362.3 | XM_001663682.2 |
| NM_004403.3 | XM_021851371.1 |
| NM_004418.4 | XR_002502992.1 |
| NM_004448.4 | XM_021853648.1 |
| NM_004452.4 | XM_021840099.1 |
| NM_004459.7 | XM_021855695.1 |
| NM_004492.3 | XM_021842026.1 |
| NM_004507.4 | XM_021843761.1 |
| NM_004508.4 | XM_001653075.2 |
| NM_004524.3 | XM_021854789.1 |
| NM_004532.6 | XM_021842931.1 |
| NM_004535.3 | XR_002500139.1 |
| NM_004544.4 | XM_001656305.2 |
| NM_004606.5 | XM_021848935.1 |
| NM_004660.5 | XR_002499027.1 |
| NM_004663.5 | XR_002501645.1 |
| NM_004688.3 | XM_021848567.1 |
| NM_004690.4 | XM_001654020.2 |
| NM_004720.7 | XM_001652913.2 |
| NM_004764.5 | XM_021857441.1 |
| NM_004769.4 | XM_021853587.1 |
| NM_004821.3 | XM_021843522.1 |
| NM_004840.3 | XM_021844250.1 |
| NM_004854.5 | XM_021850697.1 |
| NM_004861.3 | XM_021855578.1 |
| NM_004863.4 | XM_001652970.2 |
| NM_004896.5 | XM_021856581.1 |
| NM_004901.5 | XM_021855646.1 |
| NM_004902.4 | XM_021840293.1 |
| NM_004904.4 | XM_021847635.1 |
| NM_004942.4 | XM_001653335.2 |
| NM_004945.4 | XM_021855870.1 |
| NM_004953.5 | XM_021844293.1 |
| NM_004959.5 | XR_002499163.1 |
| NM_004972.4 | XR_002498866.1 |
| NM_004981.2 | XM_021855618.1 |
| NM_004994.3 | XM_001654003.2 |
| NM_005014.3 | XM_021837341.1 |
| NM_005020.5 | XM_001656408.2 |
| NM_005028.5 | XM_021849534.1 |
| NM_005032.7 | XM_001654543.2 |
| NM_005045.4 | XM_001659155.2 |
| NM_005052.3 | XR_002502414.1 |



|             |                |
|-------------|----------------|
| NM_005061.3 | XM_021852058.1 |
| NM_005103.5 | XM_021855516.1 |
| NM_005131.3 | XM_021839629.1 |
| NM_005156.7 | XM_021845224.1 |
| NM_005175.3 | XR_002501624.1 |
| NM_005186.4 | XM_001654160.2 |
| NM_005189.3 | XM_021853143.1 |
| NM_005191.4 | XM_021841737.1 |
| NM_005230.4 | XM_021843191.1 |
| NM_005235.3 | XM_001662404.2 |
| NM_005258.3 | XM_021845467.1 |
| NM_005262.3 | XM_021848319.1 |
| NM_005278.5 | XM_021857463.1 |
| NM_005294.3 | XM_021849075.1 |
| NM_005313.5 | XM_021855687.1 |
| NM_005319.4 | XM_021849500.1 |
| NM_005327.7 | XM_001650932.2 |
| NM_005360.5 | XM_021846295.1 |
| NM_005365.5 | XM_021842794.1 |
| NM_005372.1 | XM_001653158.2 |
| NM_005374.5 | XR_002499323.1 |
| NM_005387.7 | XR_002498692.1 |
| NM_005398.7 | XM_001658094.2 |
| NM_005426.3 | XM_001650248.2 |
| NM_005460.4 | XM_021857074.1 |
| NM_005469.4 | XM_001659913.2 |
| NM_005486.3 | XM_001658884.2 |
| NM_005496.3 | XM_001655116.2 |
| NM_005530.3 | XM_021856973.1 |
| NM_005534.4 | XM_021846930.1 |
| NM_005537.5 | XM_001650071.2 |
| NM_005554.4 | XM_021838685.1 |
| NM_005568.5 | XM_021848621.1 |
| NM_005600.3 | XM_021850947.1 |
| NM_005640.3 | XM_021852842.1 |
| NM_005658.5 | XR_002500962.1 |
| NM_005670.4 | XM_021840629.1 |
| NM_005691.4 | XM_021856013.1 |
| NM_005720.4 | XM_021841927.1 |
| NM_005729.4 | XM_021843458.1 |
| NM_005741.5 | XM_021845383.1 |
| NM_005744.5 | XM_001660975.2 |
| NM_005745.8 | XM_021844874.1 |
| NM_005802.5 | XM_021847814.1 |
| NM_005803.4 | XM_021855338.1 |
| NM_005817.5 | XM_021843878.1 |
| NM_005819.6 | XM_021847943.1 |
| NM_005824.3 | XM_021840369.1 |
| NM_005838.4 | XR_002502382.1 |
| NM_005894.3 | XR_002502163.1 |

|             |                |
|-------------|----------------|
| NM_005902.4 | XM_021847054.1 |
| NM_005914.4 | XM_021854333.1 |
| NM_005920.4 | XM_001658008.2 |
| NM_005928.4 | XM_021844627.1 |
| NM_005968.5 | XM_001653812.2 |
| NM_005987.4 | XM_021843270.1 |
| NM_006003.3 | XM_021851129.1 |
| NM_006009.4 | XM_021849912.1 |
| NM_006016.6 | XM_021838966.1 |
| NM_006035.4 | XR_002501370.1 |
| NM_006080.3 | XM_021839703.1 |
| NM_006092.4 | XM_021839601.1 |
| NM_006134.7 | XM_021849190.1 |
| NM_006140.6 | XM_021852849.1 |
| NM_006156.3 | XM_021846176.1 |
| NM_006177.5 | XM_021854800.1 |
| NM_006192.5 | XR_002499060.1 |
| NM_006237.4 | XM_021854475.1 |
| NM_006242.4 | XM_021854381.1 |
| NM_006246.5 | XM_021843194.1 |
| NM_006301.4 | XM_001660080.2 |
| NM_006315.6 | XM_001655013.2 |
| NM_006331.8 | XM_021854555.1 |
| NM_006341.4 | XM_021856117.1 |
| NM_006345.4 | XM_011495344.2 |
| NM_006350.5 | XM_021839228.1 |
| NM_006391.3 | XM_021853635.1 |
| NM_006408.4 | XM_001648071.2 |
| NM_006424.3 | XM_021848105.1 |
| NM_006456.3 | XM_021857466.1 |
| NM_006460.3 | XM_021856515.1 |
| NM_006462.6 | XM_021846075.1 |
| NM_006467.3 | XM_021847567.1 |
| NM_006480.5 | XM_021857640.1 |
| NM_006495.4 | XR_002500665.1 |
| NM_006536.7 | XM_021847175.1 |
| NM_006560.4 | XM_021854386.1 |
| NM_006567.5 | XM_021850980.1 |
| NM_006573.5 | XM_001657334.2 |
| NM_006585.4 | XM_021845479.1 |
| NM_006615.3 | XM_021854264.1 |
| NM_006653.5 | XM_021849502.1 |
| NM_006657.3 | XM_001664068.2 |
| NM_006668.2 | XM_021856640.1 |
| NM_006700.3 | XR_002500053.1 |
| NM_006721.4 | XM_021856641.1 |
| NM_006734.4 | XM_021838648.1 |
| NM_006755.2 | XR_002500010.1 |
| NM_006790.3 | XM_021842252.1 |
| NM_006808.3 | XM_021848626.1 |

|             |                |
|-------------|----------------|
| NM_006818.4 | XM_021843035.1 |
| NM_006828.4 | XM_021856532.1 |
| NM_006829.3 | XM_021852431.1 |
| NM_006833.5 | XM_021842762.1 |
| NM_006868.4 | XM_021845373.1 |
| NM_006875.4 | XM_021842545.1 |
| NM_006888.6 | XM_021844184.1 |
| NM_006928.5 | XM_001663342.2 |
| NM_006932.5 | XM_001658735.2 |
| NM_006980.5 | XM_001654145.2 |
| NM_006999.6 | XR_002501443.1 |
| NM_007006.3 | XM_021846932.1 |
| NM_007007.3 | XM_021842589.1 |
| NM_007010.5 | XM_021845697.1 |
| NM_007108.4 | XM_021842366.1 |
| NM_007112.5 | XM_001656937.2 |
| NM_007118.4 | XM_001650437.2 |
| NM_007134.1 | XM_021848316.1 |
| NM_007192.4 | XM_021854174.1 |
| NM_007194.4 | XM_001661402.2 |
| NM_007196.4 | XM_001653671.3 |
| NM_007210.4 | XM_021854259.1 |
| NM_007211.5 | XM_021857336.1 |
| NM_007219.5 | XM_021843455.1 |
| NM_007223.3 | XM_001661474.2 |
| NM_007267.7 | XM_001648244.2 |
| NM_007276.5 | XM_021851280.1 |
| NM_007278.2 | XM_021844082.1 |
| NM_007294.4 | XR_002502844.1 |
| NM_007333.2 | XR_002502721.1 |
| NM_009589.5 | XM_021853768.1 |
| NM_012088.3 | XM_021846177.1 |
| NM_012116.4 | XM_021847940.1 |
| NM_012130.4 | XM_021841960.1 |
| NM_012133.6 | XM_001659167.2 |
| NM_012138.4 | XM_021855515.1 |
| NM_012154.5 | XM_021840480.1 |
| NM_012164.4 | XM_021851338.1 |
| NM_012182.3 | XM_021857642.1 |
| NM_012207.3 | XM_021846790.1 |
| NM_012257.4 | XM_021856737.1 |
| NM_012265.3 | XM_001653004.2 |
| NM_012282.4 | XM_021852404.1 |
| NM_012294.5 | XM_001661916.2 |
| NM_012402.5 | XM_021849231.1 |
| NM_012413.4 | XM_021845100.1 |
| NM_012423.4 | XM_021848622.1 |
| NM_012427.5 | XM_001661687.2 |
| NM_012461.3 | XM_021841749.1 |
| NM_013239.5 | XM_021851614.1 |

|             |                |
|-------------|----------------|
| NM_013246.3 | XM_021849604.1 |
| NM_013249.4 | XM_001657750.2 |
| NM_013252.3 | XM_021856015.1 |
| NM_013264.5 | XM_021847578.1 |
| NM_013306.5 | XM_001654327.2 |
| NM_013308.4 | XM_021842419.1 |
| NM_013363.4 | XM_001663344.2 |
| NM_013365.5 | XM_021850449.1 |
| NM_013410.4 | XR_002501987.1 |
| NM_013444.4 | XM_021847997.1 |
| NM_013449.4 | XM_021842259.1 |
| NM_013450.4 | XM_001660021.2 |
| NM_013975.4 | XM_021839793.1 |
| NM_014015.4 | XM_021842645.1 |
| NM_014017.4 | XM_021848605.1 |
| NM_014045.5 | XM_021843927.1 |
| NM_014053.4 | XM_021839936.1 |
| NM_014058.4 | XM_021850526.1 |
| NM_014060.3 | XM_021855166.1 |
| NM_014064.4 | XM_021850082.1 |
| NM_014071.5 | XM_021853141.1 |
| NM_014203.3 | XM_021845758.1 |
| NM_014205.4 | XM_021855914.1 |
| NM_014264.5 | XM_021856214.1 |
| NM_014276.4 | XM_001653563.2 |
| NM_014284.3 | XM_021840976.1 |
| NM_014287.4 | XM_021857550.1 |
| NM_014339.7 | XM_001654331.2 |
| NM_014343.3 | XM_001660376.2 |
| NM_014349.3 | XR_002501678.1 |
| NM_014480.4 | XM_021843653.1 |
| NM_014482.3 | XM_001660208.2 |
| NM_014488.5 | XM_021841588.1 |
| NM_014563.6 | XM_021838207.1 |
| NM_014596.6 | XR_002499194.1 |
| NM_014598.4 | XM_001652416.2 |
| NM_014602.3 | XM_021857579.1 |
| NM_014633.5 | XR_002502317.1 |
| NM_014639.4 | XM_021849852.1 |
| NM_014640.5 | XM_021848418.1 |
| NM_014709.4 | XM_021838711.1 |
| NM_014757.5 | XM_021847188.1 |
| NM_014812.3 | XM_021852699.1 |
| NM_014813.3 | XM_021850463.1 |
| NM_014822.4 | XM_001663572.2 |
| NM_014848.7 | XM_021852810.1 |
| NM_014861.4 | XM_021845384.1 |
| NM_014872.3 | XM_021850046.1 |
| NM_014882.3 | XM_001655952.2 |
| NM_014886.6 | XM_021842135.1 |

|             |                |
|-------------|----------------|
| NM_014903.6 | XR_002502676.1 |
| NM_014912.5 | XM_021855418.1 |
| NM_014917.4 | XM_021847636.1 |
| NM_014944.4 | XM_021844970.1 |
| NM_014961.5 | XM_001661027.2 |
| NM_014977.3 | XM_021845013.1 |
| NM_015000.4 | XR_002500800.1 |
| NM_015025.4 | XM_021853767.1 |
| NM_015082.2 | XM_021843064.1 |
| NM_015114.3 | XM_021847714.1 |
| NM_015147.3 | XM_021849292.1 |
| NM_015151.4 | XM_001650570.2 |
| NM_015189.3 | XM_021847733.1 |
| NM_015196.4 | XM_001657619.2 |
| NM_015205.3 | XM_021855676.1 |
| NM_015232.2 | XM_021851898.1 |
| NM_015241.3 | XR_002502203.1 |
| NM_015245.3 | XM_021854749.1 |
| NM_015253.2 | XM_021856334.1 |
| NM_015264.2 | XM_021857291.1 |
| NM_015266.3 | XM_021848217.1 |
| NM_015270.5 | XM_001651977.2 |
| NM_015284.4 | XR_002499372.1 |
| NM_015319.2 | XM_021839201.1 |
| NM_015323.5 | XM_021844968.1 |
| NM_015331.3 | XM_021838716.1 |
| NM_015367.4 | XM_021837653.1 |
| NM_015395.3 | XM_021851476.1 |
| NM_015425.6 | XR_002502860.1 |
| NM_015434.4 | XM_021837786.1 |
| NM_015436.4 | XM_021850178.1 |
| NM_015471.4 | XM_021840726.1 |
| NM_015513.6 | XM_021845481.1 |
| NM_015566.3 | XM_001662749.2 |
| NM_015567.2 | XR_002501845.1 |
| NM_015575.4 | XM_021857148.1 |
| NM_015596.3 | XM_021854875.1 |
| NM_015633.3 | XM_021849240.1 |
| NM_015646.6 | XM_021843827.1 |
| NM_015657.4 | XM_021855517.1 |
| NM_015692.5 | XM_021838805.1 |
| NM_015693.4 | XM_021854883.1 |
| NM_015716.5 | XM_011495463.2 |
| NM_015719.4 | XM_001656380.2 |
| NM_015722.4 | XM_021842862.1 |
| NM_015723.5 | XM_021850017.1 |
| NM_015853.5 | XM_021856171.1 |
| NM_015967.7 | XM_021838524.1 |
| NM_015986.4 | XM_021843883.1 |
| NM_016003.4 | XM_021855419.1 |

|             |                |
|-------------|----------------|
| NM_016021.3 | XR_002500079.1 |
| NM_016026.4 | XM_001661783.2 |
| NM_016033.3 | XM_021850465.1 |
| NM_016083.6 | XM_021839230.1 |
| NM_016085.5 | XM_021851400.1 |
| NM_016111.4 | XM_021844415.1 |
| NM_016148.5 | XM_001649704.2 |
| NM_016161.3 | XM_001650744.2 |
| NM_016170.5 | XM_021856453.1 |
| NM_016178.2 | XM_021853789.1 |
| NM_016184.4 | XM_021857332.1 |
| NM_016235.3 | XM_021851757.1 |
| NM_016275.5 | XM_021840812.1 |
| NM_016284.5 | XM_021848158.1 |
| NM_016287.5 | XM_001659479.2 |
| NM_016315.4 | XM_021838390.1 |
| NM_016321.3 | XM_021838503.1 |
| NM_016322.4 | XM_021843517.1 |
| NM_016323.4 | XM_021848060.1 |
| NM_016360.4 | XM_021844285.1 |
| NM_016379.4 | XM_021840850.1 |
| NM_016464.5 | XM_021841323.1 |
| NM_016541.3 | XR_002502449.1 |
| NM_016553.5 | XM_021847872.1 |
| NM_016562.4 | XM_021856176.1 |
| NM_016568.3 | XR_002501877.1 |
| NM_016605.3 | XM_001660101.3 |
| NM_016617.4 | XM_021843945.1 |
| NM_016628.5 | XM_021854050.1 |
| NM_016643.4 | XM_021843243.1 |
| NM_016652.6 | XM_021845247.1 |
| NM_016734.3 | XM_021838391.1 |
| NM_016829.3 | XM_021851004.1 |
| NM_017514.5 | XM_021854524.1 |
| NM_017516.3 | XM_021848635.1 |
| NM_017522.5 | XM_021847553.1 |
| NM_017527.4 | XM_021844300.1 |
| NM_017533.2 | XM_021844522.1 |
| NM_017548.5 | XM_021839663.1 |
| NM_017576.4 | XM_021848002.1 |
| NM_017620.3 | XM_021841114.1 |
| NM_017659.4 | XM_021851630.1 |
| NM_017661.4 | XM_021857478.1 |
| NM_017676.2 | XM_021855673.1 |
| NM_017677.4 | XM_021854585.1 |
| NM_017686.4 | XM_021844708.1 |
| NM_017705.4 | XM_021848455.1 |
| NM_017714.3 | XM_021851758.1 |
| NM_017719.5 | XM_021850630.1 |
| NM_017789.5 | XM_021857193.1 |

|              |                |
|--------------|----------------|
| NM_017816.3  | XM_021854266.1 |
| NM_017831.4  | XR_002501574.1 |
| NM_017832.4  | XM_021851413.1 |
| NM_017867.3  | XR_002499304.1 |
| NM_017872.5  | XM_021854250.1 |
| NM_017891.5  | XM_001651387.2 |
| NM_017899.4  | XR_002502253.1 |
| NM_017905.6  | XM_001653355.2 |
| NM_017954.11 | XM_021854385.1 |
| NM_017956.4  | XM_021840914.1 |
| NM_018003.4  | XR_002501500.1 |
| NM_018047.3  | XM_021843976.1 |
| NM_018059.5  | XR_002503045.1 |
| NM_018062.4  | XM_021855840.1 |
| NM_018095.6  | XR_002500504.1 |
| NM_018099.5  | XM_021846788.1 |
| NM_018120.6  | XM_001660197.2 |
| NM_018166.3  | XM_021844749.1 |
| NM_018188.5  | XM_021846737.1 |
| NM_018223.2  | XM_021855142.1 |
| NM_018242.3  | XM_021853295.1 |
| NM_018270.6  | XM_001658851.2 |
| NM_018313.5  | XM_001658130.2 |
| NM_018314.6  | XM_021852851.1 |
| NM_018318.5  | XM_021844750.1 |
| NM_018324.3  | XM_021853253.1 |
| NM_018330.7  | XM_001658604.2 |
| NM_018340.3  | XM_021845341.1 |
| NM_018342.5  | XM_021845714.1 |
| NM_018374.4  | XM_021840674.1 |
| NM_018383.5  | XM_021839626.1 |
| NM_018400.4  | XM_001658442.2 |
| NM_018404.3  | XM_001660361.2 |
| NM_018451.5  | XM_001660346.2 |
| NM_018455.6  | XM_001650902.2 |
| NM_018480.7  | XM_021844620.1 |
| NM_018487.3  | XM_001654332.2 |
| NM_018561.5  | XM_021852989.1 |
| NM_018648.4  | XM_001663218.2 |
| NM_018651.4  | XM_021850267.1 |
| NM_018669.6  | XM_021838110.1 |
| NM_018724.4  | XM_001658613.2 |
| NM_018837.4  | XM_001657980.3 |
| NM_018838.5  | XM_021844862.1 |
| NM_018842.5  | XM_021856771.1 |
| NM_018898.5  | XM_001651960.2 |
| NM_018946.4  | XM_001660751.2 |
| NM_018952.5  | XM_021849634.1 |
| NM_018956.5  | XM_021849444.1 |
| NM_018963.5  | XM_021838977.1 |

|             |                |
|-------------|----------------|
| NM_018970.7 | XM_021846735.1 |
| NM_018981.4 | XM_021842396.1 |
| NM_018990.4 | XM_021837620.1 |
| NM_018999.4 | XM_021853616.1 |
| NM_019046.3 | XM_021842617.1 |
| NM_019112.4 | XM_021840611.1 |
| NM_019116.3 | XR_002502491.1 |
| NM_019120.5 | XM_021853601.1 |
| NM_019601.4 | XM_021843820.1 |
| NM_019844.4 | XM_021847451.1 |
| NM_019849.3 | XM_021848661.1 |
| NM_020133.3 | XM_001654035.2 |
| NM_020154.3 | XM_001659808.2 |
| NM_020164.5 | XM_021844115.1 |
| NM_020166.5 | XR_002500787.1 |
| NM_020171.2 | XM_021838061.1 |
| NM_020203.5 | XM_021839226.1 |
| NM_020207.7 | XM_021845394.1 |
| NM_020228.3 | XR_002499903.1 |
| NM_020244.3 | XM_021855165.1 |
| NM_020248.3 | XM_021850702.1 |
| NM_020337.3 | XM_021845136.1 |
| NM_020376.4 | XR_002500838.1 |
| NM_020377.5 | XM_021842398.1 |
| NM_020409.3 | XM_021844006.1 |
| NM_020422.6 | XM_021856691.1 |
| NM_020425.6 | XM_001661052.2 |
| NM_020469.3 | XM_021838960.1 |
| NM_020485.6 | XM_021856749.1 |
| NM_020528.3 | XM_021855584.1 |
| NM_020677.6 | XM_021850043.1 |
| NM_020692.3 | XM_001660707.2 |
| NM_020741.3 | XM_001655106.2 |
| NM_020760.4 | XM_021847486.1 |
| NM_020765.3 | XM_021855867.1 |
| NM_020781.4 | XR_002502926.1 |
| NM_020784.3 | XM_021838342.1 |
| NM_020824.4 | XM_021857266.1 |
| NM_020827.3 | XM_021847455.1 |
| NM_020830.5 | XM_011495178.2 |
| NM_020839.4 | XM_021844113.1 |
| NM_020853.2 | XM_021848937.1 |
| NM_020886.4 | XM_001659822.2 |
| NM_020911.2 | XM_021848122.1 |
| NM_020920.4 | XM_021837546.1 |
| NM_020959.3 | XM_021857019.1 |
| NM_020962.3 | XM_001657957.3 |
| NM_020984.4 | XM_001654924.2 |
| NM_020989.4 | XM_021853360.1 |
| NM_021033.7 | XR_002502777.1 |



|             |                |
|-------------|----------------|
| NM_021072.4 | XM_021845515.1 |
| NM_021104.2 | XM_021853014.1 |
| NM_021110.4 | XR_002499151.1 |
| NM_021134.4 | XM_021840325.1 |
| NM_021158.5 | XM_001648222.2 |
| NM_021168.5 | XM_021856111.1 |
| NM_021186.5 | XM_021850047.1 |
| NM_021192.3 | XM_021849253.1 |
| NM_021200.3 | XM_021852402.1 |
| NM_021202.3 | XM_021846896.1 |
| NM_021225.5 | XM_021853391.1 |
| NM_021245.4 | XR_002499979.1 |
| NM_021252.5 | XM_021852889.1 |
| NM_021574.3 | XM_021846846.1 |
| NM_021603.4 | XM_021840851.1 |
| NM_021623.2 | XM_021838672.1 |
| NM_021634.4 | XM_001651377.2 |
| NM_021643.4 | XM_021843975.1 |
| NM_021806.4 | XM_001650372.2 |
| NM_021983.4 | XM_021848770.1 |
| NM_022053.4 | XM_001653662.2 |
| NM_022058.4 | XM_021846446.1 |
| NM_022064.5 | XR_002503146.1 |
| NM_022098.4 | XR_002501635.1 |
| NM_022119.4 | XM_021841985.1 |
| NM_022135.4 | XM_021850049.1 |
| NM_022142.5 | XM_021845770.1 |
| NM_022170.2 | XM_021840907.1 |
| NM_022355.4 | XM_021841754.1 |
| NM_022437.3 | XM_001647598.2 |
| NM_022464.5 | XM_021843467.1 |
| NM_022468.5 | XM_021852239.1 |
| NM_022568.4 | XM_021855854.1 |
| NM_022645.2 | XR_002501197.1 |
| NM_022727.6 | XM_021845395.1 |
| NM_022757.5 | XM_021851795.1 |
| NM_022764.3 | XM_021844507.1 |
| NM_022765.4 | XR_002499855.1 |
| NM_022774.3 | XM_021840059.1 |
| NM_022784.3 | XM_021847833.1 |
| NM_022817.3 | XM_001657987.2 |
| NM_022818.5 | XM_001649803.2 |
| NM_022823.3 | XM_021849442.1 |
| NM_022902.5 | XM_021846867.1 |
| NM_023000.3 | XR_002503086.1 |
| NM_023915.4 | XR_002500641.1 |
| NM_023918.3 | XM_001663680.2 |
| NM_023937.4 | XM_021848147.1 |
| NM_023940.3 | XM_021846327.1 |
| NM_023946.5 | XM_021839977.1 |

|             |                |
|-------------|----------------|
| NM_024011.4 | XM_021844131.1 |
| NM_024059.3 | XM_021840111.1 |
| NM_024061.4 | XM_021852698.1 |
| NM_024067.4 | XM_021853252.1 |
| NM_024120.5 | XM_001652178.2 |
| NM_024121.3 | XM_021852245.1 |
| NM_024299.4 | XM_021840049.1 |
| NM_024324.5 | XM_001648798.2 |
| NM_024504.4 | XM_021853901.1 |
| NM_024512.5 | XM_021849630.1 |
| NM_024525.5 | XM_021842037.1 |
| NM_024528.4 | XM_001648314.2 |
| NM_024541.3 | XM_021839171.1 |
| NM_024556.4 | XM_001656578.2 |
| NM_024568.4 | XM_021842374.1 |
| NM_024577.4 | XM_021843973.1 |
| NM_024594.4 | XM_021841308.1 |
| NM_024598.4 | XM_001656954.3 |
| NM_024613.4 | XM_021850371.1 |
| NM_024617.4 | XM_021848146.1 |
| NM_024644.5 | XM_021838825.1 |
| NM_024687.4 | XM_021837983.1 |
| NM_024729.4 | XM_021848713.1 |
| NM_024754.5 | XM_001656969.2 |
| NM_024770.5 | XM_021845615.1 |
| NM_024783.4 | XM_001656664.2 |
| NM_024792.3 | XM_021848139.1 |
| NM_024798.3 | XR_002500274.1 |
| NM_024806.4 | XM_021850374.1 |
| NM_024830.5 | XM_021841699.1 |
| NM_024869.3 | XM_021845638.1 |
| NM_024872.4 | XM_021845727.1 |
| NM_024877.4 | XM_021854419.1 |
| NM_024894.4 | XM_021854797.1 |
| NM_024895.5 | XM_021855856.1 |
| NM_024899.4 | XM_021844586.1 |
| NM_024913.5 | XM_001663357.2 |
| NM_024939.3 | XM_001655462.2 |
| NM_024940.8 | XM_021850887.1 |
| NM_024955.6 | XM_021850521.1 |
| NM_024956.4 | XM_021848144.1 |
| NM_025052.5 | XM_021845612.1 |
| NM_025058.5 | XM_001657178.2 |
| NM_025142.1 | XM_021855113.1 |
| NM_025149.6 | XM_001650856.2 |
| NM_025160.7 | XM_021841797.1 |
| NM_025205.5 | XM_021850434.1 |
| NM_025233.7 | XM_021851872.1 |
| NM_025241.3 | XM_001650649.2 |
| NM_025258.3 | XM_021841028.1 |

|             |                |
|-------------|----------------|
| NM_025261.3 | XM_021853176.1 |
| NM_025264.5 | XM_021855032.1 |
| NM_030592.3 | XM_021843236.1 |
| NM_030631.4 | XR_002503270.1 |
| NM_030671.3 | XM_021843974.1 |
| NM_030763.3 | XR_002500148.1 |
| NM_030772.5 | XR_002500829.1 |
| NM_030779.4 | XM_021852780.1 |
| NM_030798.5 | XR_002501172.1 |
| NM_030820.4 | XM_021842399.1 |
| NM_030904.1 | XM_021850276.1 |
| NM_030912.3 | XM_021843828.1 |
| NM_030920.5 | XM_021851441.1 |
| NM_030927.4 | XM_021851101.1 |
| NM_030941.3 | XM_021845046.1 |
| NM_030943.4 | XM_021850368.1 |
| NM_030956.4 | XM_001653621.3 |
| NM_030961.3 | XM_001652357.2 |
| NM_030969.5 | XM_021842283.1 |
| NM_031231.4 | XM_021852092.1 |
| NM_031243.3 | XM_021845488.1 |
| NM_031268.6 | XM_021845838.1 |
| NM_031280.4 | XM_021842403.1 |
| NM_031294.4 | XM_021846348.1 |
| NM_031371.4 | XM_001654644.2 |
| NM_031444.4 | XR_002500510.1 |
| NM_031455.4 | XM_021855764.1 |
| NM_031495.2 | XM_021856949.1 |
| NM_031500.3 | XM_021842524.1 |
| NM_031852.2 | XM_021850924.1 |
| NM_031860.3 | XM_001648903.2 |
| NM_031922.5 | XM_021851368.1 |
| NM_031961.3 | XM_001659147.2 |
| NM_031965.2 | XM_021853299.1 |
| NM_032044.4 | XM_021851326.1 |
| NM_032049.4 | XM_021847735.1 |
| NM_032109.3 | XM_001656631.2 |
| NM_032111.4 | XM_021839066.1 |
| NM_032118.4 | XM_021854722.1 |
| NM_032125.3 | XM_021842346.1 |
| NM_032127.4 | XR_002498687.1 |
| NM_032145.5 | XM_021850290.1 |
| NM_032149.3 | XM_001659309.2 |
| NM_032164.4 | XM_001653664.2 |
| NM_032181.3 | XM_001647738.2 |
| NM_032268.5 | XM_021838387.1 |
| NM_032271.3 | XM_021842957.1 |
| NM_032360.4 | XM_021844495.1 |
| NM_032373.5 | XM_001654255.2 |
| NM_032375.5 | XM_021842157.1 |

|             |                |
|-------------|----------------|
| NM_032408.4 | XM_001655976.2 |
| NM_032414.3 | XM_001662958.2 |
| NM_032477.3 | XR_002498923.1 |
| NM_032523.4 | XM_011494635.2 |
| NM_032524.2 | XM_021852216.1 |
| NM_032536.4 | XM_021847173.1 |
| NM_032539.5 | XM_001659698.2 |
| NM_032550.4 | XM_021841640.1 |
| NM_032554.4 | XM_001656410.2 |
| NM_032630.3 | XM_021853265.1 |
| NM_032681.4 | XM_001657060.2 |
| NM_032796.4 | XM_021847918.1 |
| NM_032816.5 | XM_021849592.1 |
| NM_032831.4 | XM_021852328.1 |
| NM_032843.5 | XM_021839530.1 |
| NM_032866.5 | XM_021839301.1 |
| NM_032869.4 | XM_021843446.1 |
| NM_032881.3 | XM_001655217.2 |
| NM_032980.4 | XM_001661051.2 |
| NM_033011.4 | XM_021839263.1 |
| NM_033056.4 | XM_001663673.2 |
| NM_033070.3 | XM_001651810.2 |
| NM_033092.4 | XR_002501058.1 |
| NM_033110.3 | XM_001664039.2 |
| NM_033113.3 | XM_021838839.1 |
| NM_033123.4 | XR_002498651.1 |
| NM_033169.2 | XM_021845031.1 |
| NM_033172.3 | XR_002498644.1 |
| NM_033180.5 | XR_002499503.1 |
| NM_033181.4 | XM_021854312.1 |
| NM_033191.3 | XM_001655475.2 |
| NM_033253.4 | XM_021846579.1 |
| NM_033289.2 | XM_001649708.2 |
| NM_033293.4 | XM_021851681.1 |
| NM_033295.4 | XM_001662718.2 |
| NM_033313.3 | XM_021844621.1 |
| NM_033342.4 | XM_021840656.1 |
| NM_033394.3 | XM_021847719.1 |
| NM_033413.4 | XM_001661603.2 |
| NM_033423.5 | XM_021843644.1 |
| NM_033503.4 | XM_021854877.1 |
| NM_033670.4 | XM_021840725.1 |
| NM_052868.6 | XM_021837624.1 |
| NM_052870.4 | XM_021841752.1 |
| NM_052879.5 | XR_002499564.1 |
| NM_052902.4 | XM_021839178.1 |
| NM_052904.4 | XM_021857180.1 |
| NM_052926.3 | XM_021839857.1 |
| NM_052934.4 | XM_021840492.1 |
| NM_052951.3 | XM_021845188.1 |

|             |                |
|-------------|----------------|
| NM_052955.3 | XM_021849311.1 |
| NM_052959.3 | XM_001658229.2 |
| NM_052961.4 | XM_001654719.2 |
| NM_053016.6 | XM_001654979.2 |
| NM_053023.5 | XM_021854114.1 |
| NM_053051.5 | XM_021847815.1 |
| NM_054021.2 | XM_021846519.1 |
| NM_057090.3 | XM_021837755.1 |
| NM_057164.5 | XM_001652683.2 |
| NM_057179.3 | XM_001658137.2 |
| NM_058163.3 | XM_021845901.1 |
| NM_058169.6 | XM_001664064.2 |
| NM_058176.2 | XM_001658134.2 |
| NM_058187.5 | XM_021840296.1 |
| NM_058197.5 | XM_021853463.1 |
| NM_078481.4 | XM_021852791.1 |
| NM_078485.4 | XM_021839861.1 |
| NM_078626.3 | XM_011495173.2 |
| NM_078628.2 | XM_001660666.2 |
| NM_080282.4 | XM_021851948.1 |
| NM_080423.3 | XM_021854327.1 |
| NM_080590.4 | XR_002500631.1 |
| NM_080659.3 | XR_002501973.1 |
| NM_080672.5 | XR_002501944.1 |
| NM_080679.3 | XM_021851062.1 |
| NM_080737.3 | XM_021840860.1 |
| NM_080833.3 | XM_021852965.1 |
| NM_080836.4 | XM_021849716.1 |
| NM_080838.3 | XM_001655358.2 |
| NM_080841.3 | XM_021845259.1 |
| NM_080862.3 | XM_021842917.1 |
| NM_080868.3 | XM_001650797.2 |
| NM_080872.4 | XM_021844730.1 |
| NM_080879.3 | XM_001649364.2 |
| NM_080913.3 | XM_021854616.1 |
| NM_130759.4 | XM_021843213.1 |
| NM_130762.3 | XM_021852220.1 |
| NM_130787.3 | XM_001656421.2 |
| NM_130852.3 | XM_001663220.2 |
| NM_133277.4 | XM_021853472.1 |
| NM_133344.3 | XM_021844337.1 |
| NM_133373.5 | XM_021841644.1 |
| NM_133506.3 | XM_021842496.1 |
| NM_133635.6 | XM_021837639.1 |
| NM_134425.4 | XM_021849960.1 |
| NM_134440.3 | XM_001662875.2 |
| NM_134442.5 | XM_021856817.1 |
| NM_138286.3 | XM_001655960.2 |
| NM_138324.3 | XM_021850612.1 |
| NM_138348.6 | XM_021844773.1 |

|             |                |
|-------------|----------------|
| NM_138355.4 | XM_021840788.1 |
| NM_138373.5 | XM_021845480.1 |
| NM_138391.6 | XR_002501709.1 |
| NM_138413.4 | XM_001657749.2 |
| NM_138431.3 | XM_021844720.1 |
| NM_138461.4 | XR_002501527.1 |
| NM_138476.4 | XM_021852214.1 |
| NM_138499.4 | XM_001655434.2 |
| NM_138700.4 | XM_021847545.1 |
| NM_138702.1 | XM_021845632.1 |
| NM_138705.4 | XM_001663174.2 |
| NM_138711.6 | XM_021853467.1 |
| NM_138714.4 | XM_021837507.1 |
| NM_138736.3 | XM_021842859.1 |
| NM_138771.4 | XM_021842413.1 |
| NM_138782.3 | XM_021840791.1 |
| NM_138788.5 | XM_001650091.2 |
| NM_138804.5 | XM_021840191.1 |
| NM_138810.4 | XM_021839732.1 |
| NM_138927.4 | XM_001655012.2 |
| NM_138940.3 | XM_021838180.1 |
| NM_138973.4 | XR_002501286.1 |
| NM_139052.3 | XM_021841102.1 |
| NM_139074.4 | XM_021852707.1 |
| NM_139075.4 | XR_002502883.1 |
| NM_139136.4 | XM_021844569.1 |
| NM_139137.4 | XM_021855004.1 |
| NM_139209.3 | XM_001656632.2 |
| NM_139246.5 | XM_001656511.3 |
| NM_139314.3 | XM_021838157.1 |
| NM_144569.6 | XM_001649542.2 |
| NM_144608.2 | XM_021855590.1 |
| NM_144617.3 | XM_021841152.1 |
| NM_144632.5 | XM_021857043.1 |
| NM_144666.3 | XM_021853139.1 |
| NM_144672.4 | XM_001651364.2 |
| NM_144691.4 | XM_021840481.1 |
| NM_144707.4 | XM_001652727.2 |
| NM_144720.4 | XM_021849915.1 |
| NM_144725.4 | XM_021838784.1 |
| NM_144777.3 | XM_001648546.2 |
| NM_144778.4 | XM_001649235.2 |
| NM_144976.4 | XM_021841307.1 |
| NM_144989.3 | XM_001654512.2 |
| NM_145071.4 | XM_021852198.1 |
| NM_145166.4 | XR_002501843.1 |
| NM_145177.3 | XM_021853156.1 |
| NM_145178.4 | XM_021844729.1 |
| NM_145186.3 | XM_021846372.1 |
| NM_145241.5 | XM_021838179.1 |

|             |                |
|-------------|----------------|
| NM_145248.5 | XM_021857591.1 |
| NM_145257.5 | XM_021849514.1 |
| NM_145278.5 | XM_021850804.1 |
| NM_145333.3 | XM_021850805.1 |
| NM_145658.4 | XM_021855441.1 |
| NM_145808.4 | XM_021837756.1 |
| NM_145888.3 | XM_021851856.1 |
| NM_147127.5 | XM_001663647.2 |
| NM_147185.3 | XM_021855851.1 |
| NM_147686.4 | XM_001663698.2 |
| NM_148963.4 | XM_021843054.1 |
| NM_152244.2 | XM_021840790.1 |
| NM_152246.3 | XM_021840493.1 |
| NM_152274.5 | XM_021844575.1 |
| NM_152280.5 | XM_001651378.2 |
| NM_152282.5 | XM_021841383.1 |
| NM_152317.4 | XM_021847836.1 |
| NM_152318.3 | XM_001660068.2 |
| NM_152331.4 | XM_021850275.1 |
| NM_152344.4 | XM_021847075.1 |
| NM_152365.3 | XM_021851372.1 |
| NM_152369.5 | XM_001658043.2 |
| NM_152373.4 | XM_021839903.1 |
| NM_152374.2 | XM_021847721.1 |
| NM_152417.3 | XM_021852436.1 |
| NM_152432.4 | XM_021841905.1 |
| NM_152467.5 | XM_021852843.1 |
| NM_152496.3 | XR_002501695.1 |
| NM_152498.3 | XM_001649226.2 |
| NM_152512.4 | XR_002499022.1 |
| NM_152613.3 | XM_021841479.1 |
| NM_152614.3 | XM_021847989.1 |
| NM_152628.4 | XM_001648272.2 |
| NM_152641.4 | XM_021845047.1 |
| NM_152654.3 | XM_001654410.2 |
| NM_152682.4 | XM_021843520.1 |
| NM_152694.3 | XM_021839320.1 |
| NM_152724.3 | XM_021850772.1 |
| NM_152731.3 | XM_001651858.2 |
| NM_152753.4 | XR_002500917.1 |
| NM_152779.4 | XM_001657533.2 |
| NM_152792.4 | XM_021841901.1 |
| NM_152795.4 | XM_021851313.1 |
| NM_152830.3 | XM_021841746.1 |
| NM_152841.2 | XM_001662376.2 |
| NM_152869.4 | XM_001651874.2 |
| NM_152926.3 | XM_021856096.1 |
| NM_152990.4 | XR_002500447.1 |
| NM_153006.3 | XM_021856525.1 |
| NM_153047.4 | XM_021842717.1 |

|             |                |
|-------------|----------------|
| NM_153211.4 | XM_021842202.1 |
| NM_153273.4 | XM_001648690.2 |
| NM_153332.4 | XM_021849305.1 |
| NM_153437.3 | XM_021839231.1 |
| NM_153439.1 | XM_021839001.1 |
| NM_153456.4 | XM_021840450.1 |
| NM_153478.3 | XM_021853483.1 |
| NM_153480.2 | XM_021840322.1 |
| NM_153608.4 | XM_001659703.2 |
| NM_153694.5 | XM_001657875.2 |
| NM_153695.4 | XM_001648980.3 |
| NM_153712.5 | XM_021843442.1 |
| NM_153713.3 | XM_021853716.1 |
| NM_170750.3 | XM_021845051.1 |
| NM_171829.3 | XM_001661135.2 |
| NM_172107.4 | XM_001658859.2 |
| NM_172108.5 | XR_002500189.1 |
| NM_172173.3 | XR_002500002.1 |
| NM_172225.2 | XM_001651537.2 |
| NM_172316.3 | XR_002502928.1 |
| NM_172341.4 | XR_002502009.1 |
| NM_173081.5 | XM_021854738.1 |
| NM_173156.3 | XM_021848445.1 |
| NM_173163.3 | XM_021854515.1 |
| NM_173208.3 | XM_021844734.1 |
| NM_173216.2 | XR_002501122.1 |
| NM_173491.4 | XM_021850951.1 |
| NM_173497.4 | XM_021841909.1 |
| NM_173512.2 | XM_021856435.1 |
| NM_173515.4 | XM_021837515.1 |
| NM_173591.7 | XR_002500329.1 |
| NM_173595.4 | XR_002502914.1 |
| NM_173619.4 | XM_001660857.2 |
| NM_173626.4 | XM_021838568.1 |
| NM_173637.4 | XM_001662997.2 |
| NM_173653.4 | XM_021839760.1 |
| NM_173678.3 | XM_021840662.1 |
| NM_173689.7 | XM_001657506.2 |
| NM_173701.2 | XM_021849734.1 |
| NM_173803.4 | XM_021844655.1 |
| NM_173808.3 | XR_002501329.1 |
| NM_173826.4 | XM_021852407.1 |
| NM_173831.4 | XM_021856660.1 |
| NM_174882.3 | XM_021856197.1 |
| NM_174894.3 | XM_021856180.1 |
| NM_174931.4 | XM_021847555.1 |
| NM_174934.4 | XR_002502681.1 |
| NM_174969.4 | XM_021850156.1 |
| NM_175039.4 | XM_021850413.1 |
| NM_175066.4 | XR_002500265.1 |



|             |                |
|-------------|----------------|
| NM_175569.3 | XM_001649085.2 |
| NM_175739.4 | XM_021850053.1 |
| NM_175861.3 | XM_001656542.2 |
| NM_176787.5 | XM_021845582.1 |
| NM_177452.4 | XM_001661566.2 |
| NM_177536.4 | XM_021843723.1 |
| NM_177937.3 | XM_021851130.1 |
| NM_177972.3 | XM_001660445.2 |
| NM_177990.4 | XR_002498656.1 |
| NM_178151.3 | XM_021837691.1 |
| NM_178174.3 | XM_021839109.1 |
| NM_178177.5 | XM_021841108.1 |
| NM_178232.4 | XM_021856743.1 |
| NM_178332.2 | XM_021855194.1 |
| NM_178353.2 | XR_002499310.1 |
| NM_178354.3 | XM_021848828.1 |
| NM_178356.3 | XM_001660561.2 |
| NM_178452.6 | XM_021839637.1 |
| NM_178517.5 | XM_021846190.1 |
| NM_178543.5 | XR_002499496.1 |
| NM_178569.4 | XM_001661479.2 |
| NM_178587.3 | XM_021852993.1 |
| NM_178812.4 | XM_021842867.1 |
| NM_178813.6 | XR_002499347.1 |
| NM_178862.3 | XR_002499147.1 |
| NM_180982.3 | XM_021843554.1 |
| NM_181078.3 | XM_021851435.1 |
| NM_181359.3 | XM_021852059.1 |
| NM_181523.3 | XR_002501290.1 |
| NM_181538.3 | XM_021857490.1 |
| NM_181644.5 | XM_001663205.2 |
| NM_181673.3 | XM_001652914.2 |
| NM_181676.3 | XM_021855456.1 |
| NM_181715.3 | XM_021855216.1 |
| NM_181790.1 | XM_021853481.1 |
| NM_181892.4 | XM_001659792.2 |
| NM_182489.2 | XM_001653554.2 |
| NM_182491.4 | XM_021848788.1 |
| NM_182497.4 | XM_001661558.2 |
| NM_182498.4 | XM_021855208.1 |
| NM_182513.3 | XM_001662835.2 |
| NM_182581.4 | XM_021855390.1 |
| NM_182616.4 | XM_001652280.2 |
| NM_182628.3 | XM_021837294.1 |
| NM_182691.3 | XM_001655751.2 |
| NM_182719.2 | XM_001661243.2 |
| NM_182724.2 | XM_021852395.1 |
| NM_182767.6 | XM_001658318.2 |
| NM_183059.3 | XM_021840572.1 |
| NM_183060.3 | XM_001648695.2 |

|             |                |
|-------------|----------------|
| NM_183239.2 | XM_021845360.1 |
| NM_183323.3 | XM_021844758.1 |
| NM_183352.3 | XM_021841822.1 |
| NM_183361.3 | XM_021854662.1 |
| NM_183372.9 | XM_001655821.2 |
| NM_183419.4 | XR_002500081.1 |
| NM_187841.3 | XM_021854053.1 |
| NM_194272.3 | XM_021853264.1 |
| NM_194278.3 | XM_001654448.2 |
| NM_194294.2 | XM_021838365.1 |
| NM_194332.3 | XM_001663041.2 |
| NM_194447.3 | XM_001661650.2 |
| NM_197954.3 | XM_021856192.1 |
| NM_197966.3 | XM_021843722.1 |
| NM_197970.3 | XM_021852763.1 |
| NM_198057.3 | XM_021856110.1 |
| NM_198098.4 | XM_021854858.1 |
| NM_198186.3 | XM_021853050.1 |
| NM_198205.2 | XM_021845532.1 |
| NM_198269.3 | XM_021855761.1 |
| NM_198273.2 | XM_021851693.1 |
| NM_198316.2 | XM_021845787.1 |
| NM_198383.3 | XM_001648703.2 |
| NM_198404.3 | XM_021852787.1 |
| NM_198476.5 | XM_021848453.1 |
| NM_198493.3 | XM_001650093.2 |
| NM_198498.3 | XM_021853077.1 |
| NM_198530.4 | XR_002502772.1 |
| NM_198531.5 | XM_001663703.2 |
| NM_198686.3 | XM_021854299.1 |
| NM_198687.2 | XM_021846191.1 |
| NM_198699.1 | XM_021843304.1 |
| NM_198977.2 | XM_021843698.1 |
| NM_198996.4 | XM_021841784.1 |
| NM_198999.3 | XM_001660340.2 |
| NM_199123.2 | XM_021846548.1 |
| NM_199127.2 | XM_001648185.2 |
| NM_199162.3 | XM_021850139.1 |
| NM_199177.4 | XR_002500886.1 |
| NM_199184.2 | XM_021842204.1 |
| NM_199231.2 | XM_021842504.1 |
| NM_199245.3 | XM_021841305.1 |
| NM_199263.3 | XM_021838332.1 |
| NM_199321.3 | XM_001658373.2 |
| NM_199334.5 | XM_021841781.1 |
| NM_199344.3 | XM_021855855.1 |
| NM_199350.3 | XM_021845816.1 |
| NM_199363.3 | XM_021848127.1 |
| NM_199478.3 | XM_021852330.1 |
| NM_199487.3 | XM_001647941.2 |

|             |                |
|-------------|----------------|
| NM_201262.2 | XM_021852437.1 |
| NM_201380.4 | XR_002499828.1 |
| NM_201402.3 | XM_021840445.1 |
| NM_201414.3 | XM_001651231.2 |
| NM_201440.2 | XR_002499858.1 |
| NM_201441.3 | XM_021850624.1 |
| NM_201525.4 | XM_001650195.2 |
| NM_201557.4 | XM_021854661.1 |
| NM_201575.4 | XM_021851521.1 |
| NM_201632.5 | XM_021839265.1 |
| NM_203295.2 | XM_021848831.1 |
| NM_203344.3 | XM_021841482.1 |
| NM_203374.2 | XM_001656365.2 |
| NM_203453.5 | XM_021839851.1 |
| NM_203459.3 | XR_002499350.1 |
| NM_205768.3 | XM_001658649.2 |
| NM_205862.2 | XM_021848220.1 |
| NM_206825.2 | XM_001648022.2 |
| NM_206890.3 | XM_021848825.1 |
| NM_206909.3 | XM_021853570.1 |
| NM_206920.3 | XM_021840065.1 |
| NM_207128.3 | XM_001657185.2 |
| NM_207334.3 | XM_021851950.1 |
| NM_207335.4 | XM_001652445.2 |
| NM_207352.4 | XM_021854096.1 |
| NM_207364.2 | XM_021840523.1 |
| NM_207372.2 | XM_021838377.1 |
| NM_207417.3 | XM_021847564.1 |
| NM_207426.3 | XM_021839557.1 |
| NM_207519.2 | XM_021855410.1 |
| NM_212472.2 | XM_001660839.2 |
| NM_212478.3 | XM_021844203.1 |
| NM_212543.2 | XR_002500143.1 |
| NM_213603.3 | XM_001653037.2 |
| NM_213674.1 | XM_021848295.1 |
| NR_001574.2 | XR_002499002.1 |
| NR_002190.1 | XM_021855579.1 |
| NR_002311.1 | XM_001657874.2 |
| NR_002717.2 | XR_002499927.1 |
| NR_002720.2 | XM_001662534.2 |
| NR_002724.2 | XM_021845223.1 |
| NR_002807.4 | XM_021844731.1 |
| NR_002832.2 | XR_002500243.1 |
| NR_002836.2 | XM_001648188.2 |
| NR_002923.2 | XM_021852329.1 |
| NR_003040.2 | XM_021842363.1 |
| NR_003090.3 | XM_021842249.1 |
| NR_003187.3 | XM_021847816.1 |
| NR_003189.2 | XM_001653596.2 |
| NR_003228.1 | XM_021839519.1 |

|             |                |
|-------------|----------------|
| NR_003260.1 | XM_021843725.1 |
| NR_015358.2 | XM_021845617.1 |
| NR_015419.2 | XM_001664115.2 |
| NR_015436.2 | XM_021844810.1 |
| NR_015440.1 | XM_021840447.1 |
| NR_015448.1 | XM_021849940.1 |
| NR_016021.2 | XM_021851989.1 |
| NR_023349.3 | XM_021842165.1 |
| NR_023385.1 | XM_021845283.1 |
| NR_024027.2 | XM_021840660.1 |
| NR_024035.2 | XM_001655373.2 |
| NR_024056.2 | XM_021843870.1 |
| NR_024122.2 | XM_001659683.2 |
| NR_024159.1 | XR_002502268.1 |
| NR_024162.1 | XM_021852320.1 |
| NR_024188.3 | XM_021841971.1 |
| NR_024237.2 | XM_001656411.2 |
| NR_024248.1 | XM_001661062.2 |
| NR_024256.1 | XR_002500489.1 |
| NR_024269.1 | XM_021848914.1 |
| NR_024274.1 | XM_001655435.2 |
| NR_024345.1 | XM_001651868.2 |
| NR_024397.1 | XM_021854733.1 |
| NR_024435.2 | XM_021855552.1 |
| NR_024448.2 | XM_021845216.1 |
| NR_024452.1 | XM_021842166.1 |
| NR_024455.1 | XM_001662902.2 |
| NR_024457.2 | XM_001660023.2 |
| NR_024511.2 | XR_002499099.1 |
| NR_024515.2 | XM_021841981.1 |
| NR_024531.1 | XM_001652000.2 |
| NR_024533.1 | XM_001662372.2 |
| NR_024542.1 | XM_001663156.2 |
| NR_024603.1 | XM_021840665.1 |
| NR_024606.2 | XM_021847205.1 |
| NR_026542.1 | XM_021852675.1 |
| NR_026564.1 | XR_002503047.1 |
| NR_026597.2 | XM_021857142.1 |
| NR_026656.1 | XM_021852086.1 |
| NR_026708.2 | XM_021845839.1 |
| NR_026803.2 | XM_001649793.2 |
| NR_026818.1 | XM_021843764.1 |
| NR_026825.2 | XM_001651811.2 |
| NR_026857.1 | XM_021855504.1 |
| NR_026873.1 | XM_021851652.1 |
| NR_026878.1 | XM_021857264.1 |
| NR_026929.1 | XM_001653873.2 |
| NR_026933.2 | XM_001654852.2 |
| NR_026943.1 | XR_002502630.1 |
| NR_026963.1 | XM_021848827.1 |

|             |                |
|-------------|----------------|
| NR_026971.1 | XM_021841223.1 |
| NR_026988.1 | XM_021848350.1 |
| NR_027055.1 | XM_001662273.2 |
| NR_027072.2 | XM_021848273.1 |
| NR_027073.1 | XM_021845289.1 |
| NR_027078.1 | XM_001656905.2 |
| NR_027097.2 | XR_002502782.1 |
| NR_027111.1 | XR_002499143.1 |
| NR_027148.1 | XR_002500337.1 |
| NR_027163.1 | XM_021845115.1 |
| NR_027176.1 | XM_021838643.1 |
| NR_027232.1 | XM_021847509.1 |
| NR_027242.1 | XM_021845483.1 |
| NR_027277.2 | XM_021841608.1 |
| NR_027279.1 | XR_002500231.1 |
| NR_027354.2 | XM_021856307.1 |
| NR_027355.2 | XM_021857583.1 |
| NR_027365.3 | XM_021837288.1 |
| NR_027368.2 | XM_021847508.1 |
| NR_027379.1 | XM_021851228.1 |
| NR_027413.2 | XM_001654515.2 |
| NR_027418.1 | XM_021841639.1 |
| NR_027451.1 | XM_021838101.1 |
| NR_027454.2 | XM_001648518.2 |
| NR_027514.3 | XM_021857265.1 |
| NR_027632.1 | XM_021853783.1 |
| NR_027645.1 | XM_021846371.1 |
| NR_027684.2 | XM_001655596.2 |
| NR_027711.1 | XM_021852992.1 |
| NR_027749.3 | XM_021856722.1 |
| NR_027754.2 | XM_021849579.1 |
| NR_027763.2 | XM_021854618.1 |
| NR_027855.2 | XM_001654176.2 |
| NR_027946.3 | XM_021846955.1 |
| NR_027948.3 | XR_002499157.1 |
| NR_028025.3 | XM_021843933.1 |
| NR_028035.4 | XM_001654966.2 |
| NR_028272.1 | XM_001652239.2 |
| NR_028415.1 | XM_021849794.1 |
| NR_028436.3 | XM_021848513.1 |
| NR_028477.2 | XM_021845960.1 |
| NR_029392.1 | XM_021846623.1 |
| NR_029403.2 | XM_021848880.1 |
| NR_029408.1 | XM_021840378.1 |
| NR_030697.1 | XM_021855076.1 |
| NR_030770.2 | XM_001661095.2 |
| NR_033186.1 | XM_021857250.1 |
| NR_033267.1 | XM_021842420.1 |
| NR_033359.1 | XM_021849936.1 |
| NR_033658.1 | XM_021852974.1 |

|             |                |
|-------------|----------------|
| NR_033660.2 | XM_001654095.2 |
| NR_033702.2 | XM_021855077.1 |
| NR_033757.3 | XM_021840505.1 |
| NR_033807.3 | XM_021844882.1 |
| NR_033818.2 | XM_021848936.1 |
| NR_033835.1 | XM_021846720.1 |
| NR_033838.1 | XM_021850815.1 |
| NR_033839.1 | XM_021846936.1 |
| NR_033857.1 | XM_021854018.1 |
| NR_033866.1 | XM_001662650.2 |
| NR_033876.1 | XM_021843700.1 |
| NR_033894.1 | XM_001656587.2 |
| NR_033906.2 | XM_021849991.1 |
| NR_033938.1 | XM_021853477.1 |
| NR_033955.2 | XM_001652977.2 |
| NR_033965.1 | XM_001654776.2 |
| NR_033995.2 | XM_021852282.1 |
| NR_034054.1 | XM_021851357.1 |
| NR_034095.1 | XM_021856359.1 |
| NR_034105.4 | XM_001651361.2 |
| NR_034106.3 | XM_021852973.1 |
| NR_034137.1 | XR_002498640.1 |
| NR_036433.2 | XM_021843797.1 |
| NR_036437.2 | XM_021854927.1 |
| NR_036438.1 | XM_021848915.1 |
| NR_036485.1 | XM_021857021.1 |
| NR_036489.1 | XM_021852292.1 |
| NR_036490.1 | XM_001655290.2 |
| NR_036496.1 | XM_021855998.1 |
| NR_036498.1 | XM_021845778.1 |
| NR_036503.1 | XM_021840522.1 |
| NR_036569.1 | XM_021838840.1 |
| NR_036623.2 | XM_021846431.1 |
| NR_036677.1 | XM_021846367.1 |
| NR_037141.1 | XM_021841555.1 |
| NR_037160.1 | XM_021851857.1 |
| NR_037175.1 | XM_021849704.1 |
| NR_037179.1 | XM_021849908.1 |
| NR_037602.1 | XM_021854098.1 |
| NR_037611.1 | XM_001654056.2 |
| NR_037641.2 | XM_021851416.1 |
| NR_037645.2 | XM_021850010.1 |
| NR_037646.1 | XR_002500268.1 |
| NR_037703.2 | XM_021847479.1 |
| NR_037709.1 | XM_001656496.2 |
| NR_037771.2 | XM_021842619.1 |
| NR_037801.2 | XM_021853172.1 |
| NR_037805.1 | XM_021847155.1 |
| NR_037839.1 | XR_002500633.1 |
| NR_037863.1 | XM_021842876.1 |

|             |                |
|-------------|----------------|
| NR_037878.1 | XM_021855199.1 |
| NR_037891.1 | XM_021843074.1 |
| NR_037916.2 | XM_001647977.2 |
| NR_037925.1 | XM_021844897.1 |
| NR_037932.1 | XM_001653200.2 |
| NR_037946.1 | XM_021848991.1 |
| NR_038103.1 | XM_021842313.1 |
| NR_038159.2 | XM_021845330.1 |
| NR_038204.1 | XM_021851802.1 |
| NR_038220.1 | XM_021847377.1 |
| NR_038223.1 | XM_021848910.1 |
| NR_038228.1 | XM_001655415.2 |
| NR_038238.1 | XM_021845078.1 |
| NR_038246.1 | XM_021838748.1 |
| NR_038319.1 | XM_001660460.2 |
| NR_038322.2 | XM_021855448.1 |
| NR_038327.2 | XM_001647815.3 |
| NR_038392.2 | XM_021856112.1 |
| NR_038413.1 | XM_021837924.1 |
| NR_038435.1 | XM_021840122.1 |
| NR_038439.1 | XM_021851597.1 |
| NR_038449.1 | XM_021843043.1 |
| NR_038877.1 | XM_021837612.1 |
| NR_038916.1 | XM_001658356.2 |
| NR_038924.1 | XR_002501236.1 |
| NR_038930.1 | XM_021838782.1 |
| NR_038962.1 | XM_001655911.2 |
| NR_038963.1 | XM_021854890.1 |
| NR_038981.1 | XM_021842131.1 |
| NR_038996.1 | XR_002501729.1 |
| NR_040009.2 | XM_021843014.1 |
| NR_040030.1 | XM_001654830.2 |
| NR_040040.1 | XM_021838114.1 |
| NR_040044.1 | XR_002499984.1 |
| NR_040047.1 | XM_021843433.1 |
| NR_040049.1 | XM_021857691.1 |
| NR_040067.1 | XR_002502161.1 |
| NR_040070.1 | XM_021852413.1 |
| NR_040073.1 | XM_021842708.1 |
| NR_040243.2 | XM_001657934.2 |
| NR_040244.1 | XM_021848161.1 |
| NR_040718.2 | XM_021840456.1 |
| NR_045029.1 | XM_021838012.1 |
| NR_045072.2 | XM_021849774.1 |
| NR_045114.1 | XM_021849547.1 |
| NR_045118.1 | XM_001660753.2 |
| NR_045214.1 | XM_001661235.2 |
| NR_045216.1 | XR_002500006.1 |
| NR_045481.1 | XM_001650275.2 |
| NR_045555.2 | XM_001647943.2 |

|             |                |
|-------------|----------------|
| NR_045582.2 | XM_021848826.1 |
| NR_045637.1 | XM_021837664.1 |
| NR_045639.2 | XM_021846582.1 |
| NR_045663.4 | XM_001650834.2 |
| NR_045684.2 | XM_001654096.2 |
| NR_045697.1 | XM_021846106.1 |
| NR_045770.2 | XM_021840477.1 |
| NR_046012.1 | XM_021840228.1 |
| NR_046056.2 | XR_002500601.1 |
| NR_046082.2 | XR_002501751.1 |
| NR_046085.1 | XM_021841195.1 |
| NR_046093.2 | XM_021844478.1 |
| NR_046099.1 | XM_021841293.1 |
| NR_046115.2 | XM_021843311.1 |
| NR_046188.5 | XM_021841627.1 |
| NR_046223.2 | XM_021853486.1 |
| NR_046231.1 | XM_001653395.2 |
| NR_046269.1 | XM_001655556.2 |
| NR_046351.1 | XM_021857063.1 |
| NR_046354.1 | XM_021845470.1 |
| NR_046407.1 | XM_021846369.1 |
| NR_046411.2 | XR_002499107.1 |
| NR_046447.1 | XM_001651898.2 |
| NR_046465.2 | XM_001651281.2 |
| NR_046536.1 | XM_001647557.2 |
| NR_046574.1 | XM_021854815.1 |
| NR_046579.1 | XM_001654662.2 |
| NR_046630.1 | XM_001656645.2 |
| NR_046668.1 | XM_021837868.1 |
| NR_046672.1 | XM_021844129.1 |
| NR_046681.1 | XM_001655738.2 |
| NR_046708.1 | XM_001661810.2 |
| NR_046743.1 | XM_021842874.1 |
| NR_046748.1 | XM_021854529.1 |
| NR_046766.1 | XM_021856182.1 |
| NR_046769.1 | XM_021840582.1 |
| NR_046848.1 | XM_021847826.1 |
| NR_047011.1 | XR_002502734.1 |
| NR_047013.1 | XM_001655372.2 |
| NR_047493.1 | XM_021842383.1 |
| NR_047499.1 | XM_021852293.1 |
| NR_047521.1 | XM_021851546.1 |
| NR_047542.1 | XR_002499665.1 |
| NR_047550.1 | XM_021853171.1 |
| NR_047565.3 | XM_021851221.1 |
| NR_047577.2 | XM_021848136.1 |
| NR_047592.2 | XM_021854958.1 |
| NR_047607.1 | XM_021840959.1 |
| NR_047618.1 | XM_011494872.2 |
| NR_047622.1 | XM_021843625.1 |



|             |                |
|-------------|----------------|
| NR_047654.2 | XM_021852479.1 |
| NR_047658.2 | XM_021842063.1 |
| NR_047666.1 | XM_001650273.2 |
| NR_047669.2 | XM_001657475.2 |
| NR_047689.2 | XM_021849966.1 |
| NR_048537.2 | XM_001657357.2 |
| NR_048539.2 | XM_021841726.1 |
| NR_051954.3 | XM_021850260.1 |
| NR_051955.3 | XM_001656927.3 |
| NR_051960.1 | XM_001652205.3 |
| NR_051983.1 | XM_021849796.1 |
| NR_052015.4 | XM_021851457.1 |
| NR_072987.1 | XM_021845110.1 |
| NR_073020.3 | XM_001657372.2 |
| NR_073069.1 | XM_021843544.1 |
| NR_073084.1 | XM_021842853.1 |
| NR_073108.2 | XM_001651063.2 |
| NR_073136.2 | XR_002502032.1 |
| NR_073155.1 | XM_001663562.2 |
| NR_073156.2 | XM_021847592.1 |
| NR_073179.1 | XM_001660230.2 |
| NR_073366.2 | XM_001661844.2 |
| NR_073418.1 | XM_021838938.1 |
| NR_073444.2 | XM_001662980.2 |
| NR_073488.2 | XM_021854848.1 |
| NR_073504.2 | XM_001656771.2 |
| NR_073512.1 | XM_021847552.1 |
| NR_073515.3 | XM_001651631.2 |
| NR_073516.2 | XM_021846366.1 |
| NR_073543.2 | XM_021841900.1 |
| NR_073544.2 | XM_021851953.1 |
| NR_073553.3 | XM_021842357.1 |
| NR_073560.2 | XM_001654249.2 |
| NR_073582.2 | XM_001653267.2 |
| NR_074074.2 | XM_001654234.2 |
| NR_077215.1 | XM_021857725.1 |
| NR_077225.1 | XM_021848618.1 |
| NR_077236.1 | XM_021846374.1 |
| NR_102265.2 | XM_021849540.1 |
| NR_102336.1 | XM_021845219.1 |
| NR_102347.2 | XM_021838023.1 |
| NR_102713.1 | XM_001652819.2 |
| NR_102735.1 | XM_001650092.2 |
| NR_102747.1 | XM_001659423.2 |
| NR_102753.1 | XM_021854918.1 |
| NR_102761.1 | XM_021855213.1 |
| NR_102762.1 | XM_021837436.1 |
| NR_103441.2 | XM_021845345.1 |
| NR_103456.1 | XR_002498757.1 |
| NR_103460.2 | XM_001657182.2 |

|             |                |
|-------------|----------------|
| NR_103462.1 | XM_001661655.2 |
| NR_103470.1 | XM_021840472.1 |
| NR_103501.2 | XM_001650043.2 |
| NR_103523.1 | XM_021853824.1 |
| NR_103739.2 | XM_021847500.1 |
| NR_103757.2 | XM_021844670.1 |
| NR_103772.1 | XM_021849062.1 |
| NR_103776.1 | XM_021839347.1 |
| NR_103782.2 | XM_001650005.2 |
| NR_103805.1 | XM_021852865.1 |
| NR_103812.1 | XM_001663554.2 |
| NR_103828.1 | XM_021852155.1 |
| NR_103829.1 | XM_001663953.2 |
| NR_103833.1 | XM_001660752.2 |
| NR_103867.2 | XM_021840036.1 |
| NR_103873.1 | XM_021840580.1 |
| NR_104037.2 | XM_021843237.1 |
| NR_104089.2 | XM_001658753.2 |
| NR_104090.2 | XM_001662900.2 |
| NR_104091.1 | XM_021855412.1 |
| NR_104104.3 | XM_001651232.2 |
| NR_104110.1 | XM_021850604.1 |
| NR_104112.1 | XM_021849687.1 |
| NR_104116.1 | XM_021849978.1 |
| NR_104128.2 | XM_021852217.1 |
| NR_104129.1 | XR_002499736.1 |
| NR_104130.1 | XR_002500106.1 |
| NR_104169.3 | XM_001659282.2 |
| NR_104176.1 | XM_001660635.2 |
| NR_104195.2 | XM_001661236.2 |
| NR_104220.2 | XM_021840156.1 |
| NR_104222.2 | XM_021851366.1 |
| NR_104234.2 | XR_002500930.1 |
| NR_104242.2 | XM_021855847.1 |
| NR_104267.2 | XM_001656048.2 |
| NR_104442.2 | XM_021856571.1 |
| NR_104454.1 | XR_002502054.1 |
| NR_104455.2 | XR_002500170.1 |
| NR_104456.2 | XM_021855022.1 |
| NR_104457.2 | XM_021855409.1 |
| NR_104584.2 | XM_001651474.3 |
| NR_104585.2 | XM_001661374.2 |
| NR_104592.2 | XM_021854847.1 |
| NR_104607.1 | XM_021837957.1 |
| NR_104612.2 | XM_021849063.1 |
| NR_104632.1 | XM_021854691.1 |
| NR_104639.2 | XM_021843967.1 |
| NR_104675.1 | XM_021840177.1 |
| NR_104676.2 | XM_001664154.2 |
| NR_105009.1 | XR_002502908.1 |

|             |                |
|-------------|----------------|
| NR_105016.1 | XM_001655632.2 |
| NR_105056.2 | XM_021840675.1 |
| NR_108022.1 | XM_021843553.1 |
| NR_108058.1 | XM_021852485.1 |
| NR_108063.1 | XM_021849539.1 |
| NR_108070.1 | XM_001659543.2 |
| NR_108094.1 | XM_021840581.1 |
| NR_108097.1 | XM_021849014.1 |
| NR_109780.1 | XM_001653704.2 |
| NR_109805.1 | XM_001652271.2 |
| NR_109807.2 | XM_021852936.1 |
| NR_109808.2 | XM_021839004.1 |
| NR_109826.2 | XM_021846414.1 |
| NR_109836.1 | XM_021839174.1 |
| NR_109840.2 | XM_021857072.1 |
| NR_109846.1 | XM_021840805.1 |
| NR_109850.1 | XM_021840588.1 |
| NR_109859.1 | XM_021855257.1 |
| NR_109865.1 | XM_021845906.1 |
| NR_109871.2 | XM_001647652.2 |
| NR_109875.1 | XM_021845769.1 |
| NR_109881.1 | XM_021841789.1 |
| NR_109901.2 | XM_021857126.1 |
| NR_109917.1 | XM_021843824.1 |
| NR_109933.2 | XM_021848052.1 |
| NR_109950.1 | XM_021837931.1 |
| NR_109953.1 | XM_021841686.1 |
| NR_109978.2 | XM_021855013.1 |
| NR_109997.1 | XM_021854995.1 |
| NR_110032.1 | XM_021854152.1 |
| NR_110033.1 | XM_021850199.1 |
| NR_110034.2 | XM_021842798.1 |
| NR_110043.1 | XM_021844537.1 |
| NR_110052.1 | XM_021848793.1 |
| NR_110085.1 | XM_021839528.1 |
| NR_110088.1 | XM_001664144.2 |
| NR_110120.1 | XM_011495023.2 |
| NR_110139.1 | XM_001650603.2 |
| NR_110173.2 | XM_021853462.1 |
| NR_110183.1 | XM_021842849.1 |
| NR_110190.2 | XM_021849967.1 |
| NR_110195.1 | XM_021840053.1 |
| NR_110201.1 | XM_021839252.1 |
| NR_110278.1 | XM_001652614.2 |
| NR_110280.3 | XM_021838461.1 |
| NR_110303.1 | XM_021845296.1 |
| NR_110305.1 | XM_001648580.2 |
| NR_110328.3 | XM_021840270.1 |
| NR_110433.1 | XR_002501990.1 |
| NR_110434.1 | XM_021855916.1 |

|             |                |
|-------------|----------------|
| NR_110591.1 | XM_021856628.1 |
| NR_110606.1 | XM_021857538.1 |
| NR_110622.1 | XM_021842031.1 |
| NR_110651.1 | XM_021856181.1 |
| NR_110654.1 | XM_021856433.1 |
| NR_110718.1 | XM_021844421.1 |
| NR_110723.1 | XM_021840473.1 |
| NR_110729.1 | XM_021854153.1 |
| NR_110755.1 | XM_021844482.1 |
| NR_110770.2 | XM_021844643.1 |
| NR_110796.1 | XR_002499808.1 |
| NR_110812.1 | XM_021856752.1 |
| NR_110824.1 | XM_021854692.1 |
| NR_110852.1 | XM_021837381.1 |
| NR_110867.1 | XM_021845086.1 |
| NR_110874.1 | XM_021840474.1 |
| NR_110880.1 | XM_021850489.1 |
| NR_110883.1 | XM_001658443.2 |
| NR_110917.1 | XM_021845725.1 |
| NR_110945.1 | XM_021853267.1 |
| NR_110946.1 | XM_021857183.1 |
| NR_110948.1 | XM_021857174.1 |
| NR_110951.1 | XM_021850548.1 |
| NR_110991.2 | XM_021846232.1 |
| NR_110997.1 | XM_021843235.1 |
| NR_111001.1 | XM_001662198.2 |
| NR_117097.1 | XM_021857302.1 |
| NR_120308.1 | XR_002500325.1 |
| NR_120311.1 | XM_021846748.1 |
| NR_120326.1 | XM_001655244.2 |
| NR_120331.1 | XM_021840054.1 |
| NR_120343.1 | XM_021839170.1 |
| NR_120363.1 | XM_021841846.1 |
| NR_120392.1 | XR_002499755.1 |
| NR_120470.1 | XM_021849068.1 |
| NR_120495.1 | XM_021837379.1 |
| NR_120508.1 | XM_021845108.1 |
| NR_120513.1 | XM_001655633.2 |
| NR_120520.1 | XM_001663551.2 |
| NR_120527.1 | XM_001663544.2 |
| NR_120531.2 | XM_021839935.1 |
| NR_120539.1 | XM_021855258.1 |
| NR_120546.1 | XM_021852991.1 |
| NR_120547.1 | XM_021841697.1 |
| NR_120574.1 | XM_021846849.1 |
| NR_120580.1 | XM_021849969.1 |
| NR_120599.1 | XM_001651950.2 |
| NR_120609.1 | XM_021852456.1 |
| NR_120670.1 | XM_021845292.1 |
| NR_121187.1 | XM_021840192.1 |

|             |                |
|-------------|----------------|
| NR_121192.1 | XM_001652160.2 |
| NR_121564.1 | XM_021843404.1 |
| NR_121568.2 | XM_021848374.1 |
| NR_121577.1 | XM_001663538.2 |
| NR_121605.1 | XM_021837590.1 |
| NR_121612.1 | XM_021850202.1 |
| NR_121635.1 | XM_021843964.1 |
| NR_121649.1 | XM_001658838.2 |
| NR_121654.1 | XM_021852668.1 |
| NR_121661.1 | XM_021839280.1 |
| NR_121668.1 | XM_021845392.1 |
| NR_122112.1 | XM_021855544.1 |
| NR_123738.2 | XM_021855237.1 |
| NR_125330.2 | XM_001661510.2 |
| NR_125363.1 | XM_021845156.1 |
| NR_125367.1 | XM_001658073.2 |
| NR_125384.1 | XM_001661714.2 |
| NR_125426.1 | XM_001648398.2 |
| NR_125724.1 | XM_021856533.1 |
| NR_125729.1 | XM_001660113.2 |
| NR_125732.2 | XM_021852455.1 |
| NR_125763.1 | XM_021852306.1 |
| NR_125810.1 | XM_021857175.1 |
| NR_125821.1 | XM_021843741.1 |
| NR_125826.1 | XM_021854297.1 |
| NR_125848.1 | XM_021857340.1 |
| NR_125849.1 | XM_001659911.2 |
| NR_125858.1 | XM_001654567.2 |
| NR_125859.1 | XM_021840340.1 |
| NR_125860.1 | XM_021842925.1 |
| NR_125880.1 | XM_021842428.1 |
| NR_125881.1 | XM_021837830.1 |
| NR_125921.1 | XM_021847503.1 |
| NR_125932.1 | XM_021843440.1 |
| NR_125962.1 | XM_021838552.1 |
| NR_125970.1 | XM_021849060.1 |
| NR_125976.1 | XM_021849777.1 |
| NR_125995.1 | XM_001651422.2 |
| NR_126020.1 | XM_021842907.1 |
| NR_126025.1 | XM_021841861.1 |
| NR_126037.2 | XM_021840782.1 |
| NR_126054.1 | XR_002499913.1 |
| NR_126062.1 | XM_021837628.1 |
| NR_126168.1 | XM_021855436.1 |
| NR_126331.1 | XM_021854957.1 |
| NR_126333.1 | XM_021848283.1 |
| NR_126374.1 | XM_021846225.1 |
| NR_126406.1 | XM_021843140.1 |
| NR_126453.1 | XM_021855668.1 |
| NR_126500.1 | XM_001657363.2 |

|             |                |
|-------------|----------------|
| NR_126523.1 | XM_021838421.1 |
| NR_126561.1 | XM_021837632.1 |
| NR_130126.2 | XM_021853589.1 |
| NR_130130.2 | XM_021850595.1 |
| NR_130149.2 | XM_021841107.1 |
| NR_130728.1 | XM_021841088.1 |
| NR_130761.2 | XM_021849028.1 |
| NR_130766.1 | XM_021845674.1 |
| NR_130771.1 | XM_021855433.1 |
| NR_130772.1 | XM_001663302.2 |
| NR_130773.1 | XM_001661701.2 |
| NR_130927.2 | XM_001651268.2 |
| NR_130940.1 | XM_021852453.1 |
| NR_131184.1 | XR_002502046.1 |
| NR_131340.2 | XM_021841569.1 |
| NR_131753.2 | XM_021849545.1 |
| NR_131774.2 | XM_001651496.2 |
| NR_132102.1 | XM_021841118.1 |
| NR_132273.1 | XM_021852450.1 |
| NR_132338.1 | XM_021857299.1 |
| NR_132373.1 | XM_021838849.1 |
| NR_132380.1 | XM_021845062.1 |
| NR_132408.1 | XM_021844644.1 |
| NR_132415.1 | XR_002499788.1 |
| NR_132647.2 | XM_001657915.2 |
| NR_132740.2 | XM_021856089.1 |
| NR_132780.1 | XM_021857594.1 |
| NR_132970.1 | XM_021857702.1 |
| NR_132987.1 | XM_021843796.1 |
| NR_133566.1 | XR_002502830.1 |
| NR_133636.2 | XM_001647913.2 |
| NR_133637.2 | XR_002500924.1 |
| NR_133914.1 | XR_002502264.1 |
| NR_133940.1 | XM_021840465.1 |
| NR_133947.1 | XR_002499756.1 |
| NR_134238.1 | XM_001658099.2 |
| NR_134254.1 | XM_021856066.1 |
| NR_134266.1 | XM_021842624.1 |
| NR_134273.1 | XM_021843023.1 |
| NR_134275.1 | XM_021839068.1 |
| NR_134295.1 | XR_002502490.1 |
| NR_134299.2 | XM_021841620.1 |
| NR_134305.1 | XM_021846172.1 |
| NR_134332.1 | XM_021850646.1 |
| NR_134459.1 | XM_001658379.2 |
| NR_134464.2 | XM_001660215.2 |
| NR_134475.2 | XM_021840883.1 |
| NR_134529.2 | XM_021844154.1 |
| NR_134563.3 | XM_021843743.1 |
| NR_134577.1 | XM_001662574.2 |

|             |                |
|-------------|----------------|
| NR_134583.1 | XM_021838166.1 |
| NR_134598.1 | XM_001657919.2 |
| NR_134611.1 | XM_021840858.1 |
| NR_134615.1 | XM_021854160.1 |
| NR_134632.1 | XM_001656434.2 |
| NR_134637.1 | XR_002500208.1 |
| NR_134669.1 | XM_021838978.1 |
| NR_134872.2 | XM_001654840.2 |
| NR_134873.1 | XM_021844933.1 |
| NR_134878.1 | XM_021848353.1 |
| NR_134881.1 | XM_021846192.1 |
| NR_134893.2 | XM_021838399.1 |
| NR_134896.2 | XM_021854831.1 |
| NR_134924.1 | XM_001660507.2 |
| NR_134931.1 | XM_021846067.1 |
| NR_134976.3 | XM_001650806.2 |
| NR_134989.2 | XM_021847047.1 |
| NR_135049.1 | XM_021837579.1 |
| NR_135068.2 | XM_021846229.1 |
| NR_135076.1 | XM_021846171.1 |
| NR_135096.1 | XM_021845905.1 |
| NR_135108.1 | XM_001659080.2 |
| NR_135127.1 | XM_001657986.2 |
| NR_135132.1 | XM_001652414.2 |
| NR_135157.2 | XM_021843417.1 |
| NR_135166.2 | XM_001651335.2 |
| NR_135170.1 | XM_021855067.1 |
| NR_135174.1 | XM_021847985.1 |
| NR_135176.1 | XM_001650166.2 |
| NR_135203.1 | XR_002499232.1 |
| NR_135224.1 | XM_021843071.1 |
| NR_135238.1 | XM_001662279.2 |
| NR_135267.3 | XM_021854501.1 |
| NR_135481.1 | XM_021847374.1 |
| NR_135486.2 | XM_021846041.1 |
| NR_135504.1 | XM_001649177.2 |
| NR_135527.1 | XM_001663340.2 |
| NR_135532.1 | XM_021853310.1 |
| NR_135537.1 | XM_021843261.1 |
| NR_135551.1 | XM_021847052.1 |
| NR_135557.1 | XM_021853884.1 |
| NR_135616.1 | XM_021846948.1 |
| NR_135643.1 | XR_002499516.1 |
| NR_135653.2 | XM_001652763.2 |
| NR_135666.1 | XM_021857114.1 |
| NR_135674.1 | XM_021857717.1 |
| NR_135682.1 | XM_021838427.1 |
| NR_135687.1 | XM_021838168.1 |
| NR_135758.2 | XM_021847931.1 |
| NR_135764.1 | XM_021849799.1 |

|             |                |
|-------------|----------------|
| NR_135807.2 | XM_021855852.1 |
| NR_135828.1 | XM_021843748.1 |
| NR_135847.2 | XM_001651427.2 |
| NR_135855.2 | XM_001650246.2 |
| NR_136174.2 | XR_002501952.1 |
| NR_136178.1 | XM_021857719.1 |
| NR_136195.1 | XM_021851505.1 |
| NR_136201.1 | XM_001660350.2 |
| NR_136230.2 | XM_021841672.1 |
| NR_136242.2 | XM_021840294.1 |
| NR_136245.1 | XM_021846745.1 |
| NR_136253.1 | XM_021843794.1 |
| NR_136256.1 | XR_002503246.1 |
| NR_136272.1 | XM_001655872.3 |
| NR_136276.2 | XM_021849963.1 |
| NR_136290.1 | XM_021854990.1 |
| NR_136300.1 | XM_021852192.1 |
| NR_136301.1 | XR_002502101.1 |
| NR_136318.1 | XR_002499965.1 |
| NR_136331.3 | XM_021856688.1 |
| NR_136403.1 | XM_021855919.1 |
| NR_136518.1 | XM_021837919.1 |
| NR_136552.1 | XM_021850766.1 |
| NR_136565.2 | XM_021845726.1 |
| NR_136569.2 | XM_021845323.1 |
| NR_136586.2 | XR_002499531.1 |
| NR_136635.2 | XM_001663091.2 |
| NR_136644.1 | XM_001649286.2 |
| NR_136645.2 | XM_001649197.2 |
| NR_136700.2 | XM_021857330.1 |
| NR_136708.2 | XM_021839061.1 |
| NR_136719.2 | XM_021844128.1 |
| NR_136721.2 | XM_001661898.2 |
| NR_136746.2 | XM_021845503.1 |
| NR_136748.1 | XM_021839891.1 |
| NR_137185.1 | XM_021846330.1 |
| NR_137189.1 | XM_001663326.2 |
| NR_137194.1 | XM_021845388.1 |
| NR_137281.2 | XM_001658958.2 |
| NR_137425.1 | XM_021842631.1 |
| NR_137431.1 | XM_021850607.1 |
| NR_138035.2 | XM_021842982.1 |
| NR_138070.2 | XM_021846422.1 |
| NR_138073.2 | XM_021853912.1 |
| NR_138076.2 | XM_021851801.1 |
| NR_138077.2 | XM_021837965.1 |
| NR_138091.1 | XM_001660119.2 |
| NR_138116.2 | XR_002500293.1 |
| NR_138121.2 | XM_001649105.2 |
| NR_138123.2 | XM_021853913.1 |



|             |                |
|-------------|----------------|
| NR_138130.2 | XM_001652027.2 |
| NR_138256.2 | XM_011494848.2 |
| NR_138259.1 | XM_001654687.2 |
| NR_138426.2 | XM_001656014.2 |
| NR_138467.2 | XM_021857384.1 |
| NR_138609.2 | XM_001651600.2 |
| NR_138612.2 | XM_001658187.2 |
| NR_144335.2 | XM_001654383.2 |
| NR_144339.2 | XM_021843622.1 |
| NR_144380.2 | XM_021855430.1 |
| NR_144399.2 | XM_021842870.1 |
| NR_144524.2 | XM_021849733.1 |
| NR_144530.1 | XM_021841568.1 |
| NR_144540.1 | XM_021839859.1 |
| NR_144635.2 | XM_001653367.2 |
| NR_144759.2 | XM_021848790.1 |
| NR_144943.2 | XM_021851711.1 |
| NR_145129.1 | XM_021849561.1 |
| NR_145441.2 | XM_021855402.1 |
| NR_145449.1 | XM_021853822.1 |
| NR_145469.1 | XM_021855328.1 |
| NR_145502.2 | XM_021850999.1 |
| NR_145677.1 | XM_021855401.1 |
| NR_145683.2 | XR_002500107.1 |
| NR_145684.2 | XM_021847487.1 |
| NR_145685.2 | XM_001663392.2 |
| NR_145697.1 | XM_021844302.1 |
| NR_145704.1 | XM_001653015.2 |
| NR_145706.1 | XM_011495220.2 |
| NR_145819.1 | XM_021846552.1 |
| NR_145823.1 | XM_001660882.2 |
| NR_146091.2 | XM_021851712.1 |
| NR_146100.2 | XM_001660575.2 |
| NR_146109.1 | XM_021855426.1 |
| NR_146119.1 | XM_001649843.2 |
| NR_146128.2 | XM_021842961.1 |
| NR_146134.2 | XM_011494916.2 |
| NR_146143.3 | XM_021839711.1 |
| NR_146145.2 | XM_021848310.1 |
| NR_146167.2 | XM_021857671.1 |
| NR_146174.2 | XM_021853210.1 |
| NR_146176.2 | XM_021844272.1 |
| NR_146223.1 | XR_002501800.1 |
| NR_146233.2 | XM_021854223.1 |
| NR_146275.1 | XM_021844863.1 |
| NR_146279.1 | XM_021845917.1 |
| NR_146285.2 | XM_001649679.2 |
| NR_146312.1 | XM_021844653.1 |
| NR_146323.1 | XR_002498996.1 |
| NR_146341.2 | XM_021840063.1 |

|             |                |
|-------------|----------------|
| NR_146342.2 | XM_021852253.1 |
| NR_146384.1 | XM_001648269.2 |
| NR_146438.1 | XM_001654837.2 |
| NR_146439.1 | XM_021839892.1 |
| NR_146442.1 | XM_021845282.1 |
| NR_146456.1 | XM_021850943.1 |
| NR_146465.2 | XR_002498746.1 |
| NR_146476.1 | XM_021851556.1 |
| NR_146504.1 | XM_021844455.1 |
| NR_146507.1 | XR_002500980.1 |
| NR_146512.2 | XM_021846676.1 |
| NR_146588.1 | XM_001658961.2 |
| NR_146592.1 | XM_021840888.1 |
| NR_146598.2 | XM_021851363.1 |
| NR_146647.1 | XM_021849033.1 |
| NR_146717.1 | XM_021849778.1 |
| NR_146720.2 | XM_021838327.1 |
| NR_146733.1 | XM_001657543.2 |
| NR_146735.1 | XM_021850252.1 |
| NR_146736.1 | XM_021850257.1 |
| NR_146740.2 | XM_021844316.1 |
| NR_146763.2 | XM_001658078.2 |
| NR_146769.1 | XM_021849429.1 |
| NR_146771.1 | XM_021844900.1 |
| NR_146778.2 | XM_021855428.1 |
| NR_146866.1 | XM_021839786.1 |
| NR_146868.1 | XM_021857373.1 |
| NR_146879.2 | XM_021843932.1 |
| NR_146896.1 | XM_021839710.1 |
| NR_146905.1 | XM_021845162.1 |
| NR_146908.1 | XM_021847378.1 |
| NR_146957.1 | XM_021846677.1 |
| NR_146960.1 | XM_021855484.1 |
| NR_146965.2 | XM_021847287.1 |
| NR_146980.2 | XM_021845053.1 |
| NR_146984.3 | XM_021838323.1 |
| NR_147004.1 | XM_021851713.1 |
| NR_147021.2 | XM_021846679.1 |
| NR_147052.2 | XM_021845218.1 |
| NR_147060.2 | XM_001653111.2 |
| NR_147061.1 | XM_021853316.1 |
| NR_147081.2 | XM_021850418.1 |
| NR_147085.2 | XM_001663525.2 |
| NR_147095.2 | XM_021839856.1 |
| NR_147132.2 | XR_002499404.1 |
| NR_147136.2 | XM_021846202.1 |
| NR_147170.1 | XM_001653553.2 |
| NR_147171.2 | XM_001661539.2 |
| NR_147175.1 | XM_001652665.2 |
| NR_147186.1 | XM_001656168.2 |

|             |                |
|-------------|----------------|
| NR_147255.2 | XM_021851849.1 |
| NR_147408.1 | XM_021849911.1 |
| NR_147452.2 | XM_001650224.2 |
| NR_147506.1 | XM_021840886.1 |
| NR_147507.1 | XM_001659537.2 |
| NR_147791.2 | XM_021845325.1 |
| NR_147844.1 | XM_021842225.1 |
| NR_147910.2 | XM_001662162.2 |
| NR_147924.2 | XM_021838344.1 |
| NR_147928.2 | XM_021849438.1 |
| NR_147942.2 | XM_021848523.1 |
| NR_147986.1 | XM_021837689.1 |
| NR_148002.2 | XM_001653080.2 |
| NR_148203.1 | XM_021857661.1 |
| NR_148241.1 | XM_001655945.2 |
| NR_148367.1 | XM_001654671.2 |
| NR_148373.1 | XM_021846751.1 |
| NR_148384.2 | XM_021849218.1 |
| NR_148413.2 | XM_021853311.1 |
| NR_148440.2 | XM_001658397.2 |
| NR_148447.1 | XM_021847933.1 |
| NR_148469.2 | XM_021852179.1 |
| NR_148478.2 | XM_021838610.1 |
| NR_148508.1 | XM_021844806.1 |
| NR_148511.2 | XM_021845000.1 |
| NR_148921.2 | XM_001652876.3 |
| NR_148977.1 | XM_021856829.1 |
| NR_148984.2 | XM_021854441.1 |
| NR_148987.2 | XM_021847634.1 |
| NR_148995.1 | XM_021841532.1 |
| NR_149033.1 | XM_021850610.1 |
| NR_149038.1 | XM_001649562.2 |
| NR_149039.1 | XM_001656886.2 |
| NR_149061.2 | XM_001659323.2 |
| NR_149074.1 | XR_002500933.1 |
| NR_149086.1 | XM_001657661.2 |
| NR_149093.2 | XM_001656371.2 |
| NR_149106.1 | XM_001658843.2 |
| NR_149109.1 | XM_021853946.1 |
| NR_149165.2 | XM_021843144.1 |
| NR_151483.1 | XM_001655388.2 |
| NR_152570.1 | XR_002502226.1 |
| NR_152576.1 | XM_001657559.2 |
| NR_152746.1 | XM_021843898.1 |
| NR_152799.1 | XM_021847818.1 |
| NR_152811.1 | XR_002501025.1 |
| NR_152813.1 | XM_021848530.1 |
| NR_152870.1 | XM_021845037.1 |
| NR_156490.1 | XM_001656162.2 |
| NR_156732.1 | XM_021843072.1 |

|             |                |
|-------------|----------------|
| NR_157086.1 | XM_021844274.1 |
| NR_157112.2 | XM_021845533.1 |
| NR_157587.1 | XM_021847288.1 |
| NR_157804.1 | XM_021839989.1 |
| NR_157807.1 | XM_001658951.2 |
| NR_157824.1 | XM_021846840.1 |
| NR_157826.1 | XM_021850498.1 |
| NR_157842.1 | XM_021853725.1 |
| NR_158184.1 | XM_021843770.1 |
| NR_158193.1 | XM_021844016.1 |
| NR_158197.1 | XM_021837907.1 |
| NR_158215.1 | XM_021854685.1 |
| NR_158567.1 | XM_021843636.1 |
| NR_158629.1 | XM_021843934.1 |
| NR_158768.1 | XR_002502055.1 |
| NR_158770.1 | XM_021840149.1 |
| NR_158772.1 | XM_021845324.1 |
| NR_158778.1 | XM_021848437.1 |
| NR_159362.2 | XM_021841300.1 |
| NR_159369.2 | XM_021844525.1 |
| NR_159371.1 | XM_021847453.1 |
| NR_159376.2 | XM_021853137.1 |
| NR_159386.1 | XM_021840508.1 |
| NR_159387.1 | XM_001650559.2 |
| NR_159403.1 | XM_021851855.1 |
| NR_159737.1 | XM_021846935.1 |
| NR_159738.1 | XM_021846345.1 |
| NR_159806.1 | XM_001663167.2 |
| NR_159941.1 | XM_001650162.2 |
| NR_159966.1 | XM_021852500.1 |
| NR_160296.2 | XM_021846495.1 |
| NR_160413.1 | XM_021856074.1 |
| NR_160426.1 | XR_002500245.1 |
| NR_160551.1 | XM_021845344.1 |
| NR_160657.1 | XM_021840896.1 |
| NR_160705.1 | XM_021857300.1 |
| NR_160708.1 | XM_001663119.2 |
| NR_160718.1 | XM_021854075.1 |
| NR_160743.1 | XM_001657747.2 |
| NR_160745.1 | XR_002500815.1 |
| NR_160777.1 | XM_011494841.2 |
| NR_160778.1 | XM_021841862.1 |
| NR_160783.1 | XM_021838467.1 |
| NR_160915.1 | XR_002499038.1 |
| NR_160979.1 | XR_002499811.1 |
| NR_160980.1 | XM_021853109.1 |
| NR_161186.1 | XM_021845959.1 |
| NR_161203.1 | XM_021853258.1 |
| NR_161233.1 | XM_001657351.2 |
| NR_161292.1 | XM_001653290.2 |

|             |                |
|-------------|----------------|
| NR_161371.1 | XM_021849428.1 |
| NR_161435.2 | XM_021853950.1 |
| NR_161466.1 | XM_021854801.1 |
| NR_161467.1 | XM_021841061.1 |
| NR_163149.1 | XM_001655108.2 |
| NR_163195.1 | XM_021851619.1 |
| NR_163241.1 | XM_021838095.1 |
| NR_163266.1 | XM_021837438.1 |
| NR_163392.1 | XR_002498665.1 |
| NR_163410.1 | XM_021855765.1 |
| NR_163466.1 | XM_021841283.1 |
| NR_163481.1 | XM_021850559.1 |
| NR_163889.1 | XR_002500979.1 |
| NR_163917.1 | XM_021847796.1 |
| NR_163981.1 | XM_021847767.1 |
| NR_163993.1 | XM_021847665.1 |
| NR_164009.1 | XM_021847504.1 |
| NR_164155.1 | XR_002502193.1 |
| NR_164337.1 | XM_021843164.1 |
| NR_164338.1 | XR_002499922.1 |
| NR_164659.1 | XM_001659258.2 |
| NR_164700.2 | XM_021839995.1 |
| NR_164706.1 | XM_001656401.2 |
| NR_164715.1 | XM_001660646.2 |
| NR_164732.1 | XM_021839712.1 |
| NR_164747.1 | XM_021841813.1 |
| NR_164753.1 | XM_021851436.1 |
| NR_164767.1 | XM_021837754.1 |
| NR_164774.1 | XM_021849817.1 |
| NR_164779.1 | XM_021837278.1 |
| NR_164783.1 | XM_021857704.1 |
| NR_164787.1 | XM_001659861.2 |
| NR_164790.1 | XM_021852960.1 |
| NR_164810.1 | XM_021840182.1 |
| NR_164822.1 | XM_001662731.1 |
| NR_165108.1 | XR_002500884.1 |
| NR_165111.1 | XR_002500542.1 |
| NR_165115.1 | XM_001653675.2 |
| NR_165140.1 | XM_021843746.1 |
| NR_165235.1 | XM_021844470.1 |
| NR_165295.1 | XM_021842851.1 |
| NR_165336.1 | XM_001663729.2 |
| NR_165344.1 | XM_021845471.1 |
| NR_165367.1 | XM_021839249.1 |
| NR_165400.1 | XM_001660345.2 |
| NR_165401.1 | XM_021844825.1 |
| NR_165409.1 | XM_021843769.1 |
| NR_165431.1 | XR_002500024.1 |
| NR_165439.1 | XM_021840806.1 |
| NR_165630.1 | XM_021842879.1 |

|             |                |
|-------------|----------------|
| NR_165650.1 | XM_001654242.2 |
| NR_166069.1 | XM_021838796.1 |
| NR_166196.1 | XM_021848452.1 |
| NR_166825.1 | XM_021839000.1 |
| NR_166844.1 | XM_021851013.1 |
| NR_167706.1 | XM_021846430.1 |
| NR_167709.1 | XM_021841651.1 |
| NR_167744.1 | XM_021853731.1 |
| NR_167745.1 | XM_021849066.1 |
| NR_167888.1 | XM_021850913.1 |
| NR_167907.1 | XM_021845030.1 |
| NR_167910.1 | XM_021847870.1 |
| NR_167931.1 | XM_001648285.2 |
| NR_167974.1 | XM_021856023.1 |
| NR_167991.1 | XM_021853243.1 |
| NR_168050.1 | XM_001650796.2 |
| NR_168136.1 | XM_021839469.1 |
| NR_168365.1 | XM_021843432.1 |
| NR_168385.1 | XM_021849217.1 |
| NR_168386.1 | XM_021838017.1 |
| NR_168437.1 | XM_021851617.1 |
| NR_168445.1 | XM_001658196.2 |
| NR_168454.1 | XM_001661563.2 |
| NR_168520.1 | XM_021844472.1 |
| NR_169221.1 | XM_021856787.1 |
| NR_169231.1 | XM_021841576.1 |
| NR_169511.1 | XR_002499182.1 |
| NR_169524.1 | XM_001660542.2 |
| NR_169541.1 | XM_021856912.1 |
| NR_169542.1 | XM_021839841.1 |
| NR_169543.1 | XM_021857721.1 |
| NR_169570.1 | XM_021845021.1 |
| NR_169578.1 | XM_021857563.1 |
| NR_169585.1 | XM_021846046.1 |
| NR_169586.1 | XM_021857240.1 |
| NR_169640.1 | XM_021839813.1 |
| NR_169733.1 | XM_021854856.1 |
| NR_169740.1 | XM_021838712.1 |
| NR_169752.1 | XM_021856811.1 |
| NR_169768.1 | XM_021852501.1 |
| NR_169790.1 | XM_021846332.1 |
| NR_169835.1 | XM_021840348.1 |
| NR_169839.1 | XM_021843611.1 |
| NR_169846.1 | XM_001661082.2 |
| NR_169859.1 | XM_021857433.1 |
| NR_169880.1 | XM_021839956.1 |
| NR_170172.1 | XM_001651860.2 |
| NR_170230.1 | XM_021839451.1 |
| NR_170244.1 | XM_021849577.1 |
| NR_170268.1 | XM_021854699.1 |

|                |                |
|----------------|----------------|
| NR_170274.1    | XM_021841924.1 |
| NR_170318.1    | XM_021845947.1 |
| NR_170357.1    | XM_021842046.1 |
| NR_170364.1    | XM_021837874.1 |
| NR_170571.1    | XM_021840135.1 |
| NR_170584.1    | XM_021844541.1 |
| NR_170613.1    | XM_021838649.1 |
| NR_170627.1    | XM_021850618.1 |
| NR_170680.1    | XM_001660494.2 |
| NR_170691.1    | XM_021840772.1 |
| NR_170709.1    | XR_002501689.1 |
| NR_170867.1    | XM_021839483.1 |
| NR_170886.1    | XM_021845399.1 |
| NR_170903.1    | XM_021843091.1 |
| NR_170907.1    | XM_021843403.1 |
| NR_170928.1    | XM_021851367.1 |
| NR_170930.1    | XM_021840292.1 |
| NR_170960.1    | XM_021848241.1 |
| NR_170966.1    | XM_021854074.1 |
| NR_170970.1    | XM_001658848.3 |
| NR_170978.1    | XM_001658253.2 |
| NR_170982.1    | XM_001655641.2 |
| NR_171035.1    | XM_001649981.2 |
| NR_171164.1    | XM_021851732.1 |
| XM_005245005.2 | XM_021840865.1 |
| XM_005245024.2 | XM_021839225.1 |
| XM_005245048.3 | XM_021845054.1 |
| XM_005245267.4 | XR_002501237.1 |
| XM_005245314.2 | XM_021848813.1 |
| XM_005245325.4 | XM_001647527.2 |
| XM_005245348.4 | XM_001650229.2 |
| XM_005245453.1 | XM_021854905.1 |
| XM_005245508.3 | XM_021844511.1 |
| XM_005245532.4 | XM_021849802.1 |
| XM_005246141.4 | XM_021846877.1 |
| XM_005246212.3 | XM_021838098.1 |
| XM_005246255.2 | XM_021854294.1 |
| XM_005246446.3 | XM_021844651.1 |
| XM_005246456.1 | XM_001662815.3 |
| XM_005246489.4 | XM_021840595.1 |
| XM_005246505.2 | XR_002502118.1 |
| XM_005246593.2 | XM_021847949.1 |
| XM_005246812.2 | XM_001654563.2 |
| XM_005247248.5 | XM_021853173.1 |
| XM_005247284.3 | XM_021842497.1 |
| XM_005247309.2 | XM_021850190.1 |
| XM_005247347.4 | XM_021847442.1 |
| XM_005247372.4 | XM_001654939.2 |
| XM_005247458.5 | XM_001654938.2 |
| XM_005247512.1 | XM_001654024.2 |

XM\_005247538.3 XM\_021840885.1  
XM\_005247594.5 XM\_021844123.1  
XM\_005247982.3 XM\_021848058.1  
XM\_005248028.5 XM\_001654401.2  
XM\_005248060.1 XM\_001657332.2  
XM\_005248231.3 XM\_021843150.1  
XM\_005248376.4 XM\_021856056.1  
XM\_005248504.4 XM\_021845286.1  
XM\_005248612.3 XR\_002501564.1  
XM\_005248700.3 XM\_021841149.1  
XM\_005248843.4 XM\_001656857.2  
XM\_005248893.3 XM\_021843930.1  
XM\_005248901.3 XM\_001663312.2  
XM\_005248951.4 XM\_021843163.1  
XM\_005248976.1 XM\_021842696.1  
XM\_005248999.2 XM\_001655768.2  
XM\_005249010.2 XM\_001652794.2  
XM\_005249079.2 XM\_001659206.2  
XM\_005249184.5 XR\_002499135.1  
XM\_005249218.1 XM\_001654379.2  
XM\_005249295.1 XM\_001649170.2  
XM\_005249315.3 XM\_021838392.1  
XM\_005249353.4 XM\_021854168.1  
XM\_005249403.3 XM\_021840813.1  
XM\_005249531.1 XM\_021842080.1  
XM\_005249584.3 XM\_021857505.1  
XM\_005249729.1 XM\_021838138.1  
XM\_005249883.5 XM\_021853250.1  
XM\_005249916.1 XM\_021844524.1  
XM\_005249952.4 XM\_001650451.2  
XM\_005250129.4 XM\_011494761.2  
XM\_005250405.2 XM\_021847156.1  
XM\_005250493.1 XM\_021846640.1  
XM\_005250502.2 XM\_021846625.1  
XM\_005250509.4 XM\_021849043.1  
XM\_005250574.3 XM\_021839293.1  
XM\_005250772.3 XM\_021840520.1  
XM\_005250773.3 XM\_021846341.1  
XM\_005250978.3 XM\_021857210.1  
XM\_005251025.5 XM\_021854518.1  
XM\_005251040.4 XM\_001659611.2  
XM\_005251121.2 XM\_021853073.1  
XM\_005251135.4 XM\_001656668.2  
XM\_005251590.1 XM\_021839454.1  
XM\_005251783.3 XM\_001655274.2  
XM\_005251826.2 XM\_001657991.2  
XM\_005251973.4 XM\_021851973.1  
XM\_005251987.4 XM\_021841098.1  
XM\_005252067.4 XM\_021838165.1  
XM\_005252151.1 XM\_021851805.1



XM\_005252208.2 XM\_021843929.1  
XM\_005252369.3 XM\_021849614.1  
XM\_005252627.3 XM\_011494970.2  
XM\_005252669.3 XM\_021855759.1  
XM\_005252787.2 XM\_021841302.1  
XM\_005252788.2 XM\_021842642.1  
XM\_005252921.3 XM\_021845887.1  
XM\_005253138.5 XM\_001655520.3  
XM\_005253168.3 XM\_001657469.2  
XM\_005253196.3 XM\_021843145.1  
XM\_005253229.2 XR\_002502336.1  
XM\_005253334.3 XM\_021856426.1  
XM\_005253698.4 XM\_001657918.2  
XM\_005253824.3 XM\_021847490.1  
XM\_005253834.4 XR\_002499409.1  
XM\_005253908.4 XM\_021852100.1  
XM\_005253944.4 XM\_021848814.1  
XM\_005254235.3 XM\_021848750.1  
XM\_005254430.5 XM\_021852815.1  
XM\_005254481.3 XM\_021841230.1  
XM\_005254529.4 XM\_021838873.1  
XM\_005254646.2 XR\_002501692.1  
XM\_005254671.2 XM\_001648890.2  
XM\_005254685.4 XM\_021856005.1  
XM\_005254795.5 XM\_001647909.2  
XM\_005254916.3 XM\_021854058.1  
XM\_005254934.4 XM\_021854807.1  
XM\_005255077.1 XM\_001657110.2  
XM\_005255182.3 XM\_001657964.2  
XM\_005255210.2 XM\_021846340.1  
XM\_005255304.4 XM\_021849484.1  
XM\_005255539.3 XM\_021854377.1  
XM\_005255558.2 XM\_021845964.1  
XM\_005255725.5 XM\_021857593.1  
XM\_005255741.4 XM\_021841811.1  
XM\_005255952.5 XM\_021852659.1  
XM\_005256255.2 XM\_021852445.1  
XM\_005256399.5 XM\_001655822.2  
XM\_005256424.2 XM\_001660628.2  
XM\_005256629.1 XM\_021838872.1  
XM\_005256678.5 XM\_021841355.1  
XM\_005256770.1 XM\_021851593.1  
XM\_005256784.4 XR\_002499353.1  
XM\_005256856.3 XM\_021856553.1  
XM\_005256866.5 XM\_021844322.1  
XM\_005256905.2 XM\_001652148.2  
XM\_005257019.1 XM\_001661173.2  
XM\_005257076.3 XM\_001654141.2  
XM\_005257098.3 XM\_021856918.1  
XM\_005257126.4 XM\_001649603.2

XM\_005257161.3 XR\_002501855.1  
XM\_005257187.4 XM\_021843643.1  
XM\_005257365.4 XR\_002499205.1  
XM\_005257370.4 XM\_021846044.1  
XM\_005257373.4 XM\_001656630.2  
XM\_005257468.5 XR\_002499626.1  
XM\_005257512.2 XM\_021852990.1  
XM\_005257703.1 XM\_021840131.1  
XM\_005257774.4 XM\_021850647.1  
XM\_005257859.4 XM\_021841723.1  
XM\_005258315.5 XM\_021852595.1  
XM\_005258361.3 XM\_001662106.2  
XM\_005258459.4 XR\_002502177.1  
XM\_005258620.2 XM\_001653393.2  
XM\_005258710.5 XM\_001647886.2  
XM\_005258746.3 XM\_011494796.2  
XM\_005258883.2 XR\_002500387.1  
XM\_005259153.3 XM\_021840622.1  
XM\_005259215.4 XM\_021849409.1  
XM\_005259323.1 XM\_001648284.2  
XM\_005259327.3 XM\_021848320.1  
XM\_005259467.1 XM\_021845755.1  
XM\_005259813.4 XM\_021848086.1  
XM\_005259834.1 XR\_002502274.1  
XM\_005259913.2 XM\_001658819.2  
XM\_005259941.4 XM\_021852033.1  
XM\_005259951.4 XM\_021838485.1  
XM\_005260183.2 XM\_021854528.1  
XM\_005260192.2 XM\_021854495.1  
XM\_005260195.4 XM\_001652422.2  
XM\_005260197.4 XM\_001663850.2  
XM\_005260382.4 XM\_001648250.2  
XM\_005260407.4 XM\_021840015.1  
XM\_005260465.3 XM\_021844946.1  
XM\_005260467.4 XM\_001654923.2  
XM\_005260501.5 XM\_021847076.1  
XM\_005260749.4 XM\_021841894.1  
XM\_005260978.4 XM\_021839923.1  
XM\_005260979.2 XM\_001651872.2  
XM\_005260997.5 XM\_021856058.1  
XM\_005261068.3 XM\_021851708.1  
XM\_005261121.3 XM\_021846972.1  
XM\_005261135.3 XM\_021841359.1  
XM\_005261168.4 XM\_021855398.1  
XM\_005261171.3 XM\_021847310.1  
XM\_005261415.3 XM\_001653958.2  
XM\_005261430.2 XR\_002500025.1  
XM\_005261525.4 XM\_021857228.1  
XM\_005261695.1 XM\_001653029.2  
XM\_005261705.4 XM\_021850713.1

XM\_005261986.4 XM\_021847632.1  
XM\_005262155.4 XM\_021857674.1  
XM\_005262310.3 XM\_021842960.1  
XM\_005262315.3 XM\_021857519.1  
XM\_005262384.4 XR\_002500751.1  
XM\_005262472.2 XM\_001656487.3  
XM\_005262489.5 XR\_002502186.1  
XM\_005262750.4 XM\_021857375.1  
XM\_005262772.3 XM\_021843413.1  
XM\_005262774.4 XM\_001655947.2  
XM\_005262937.4 XM\_021852147.1  
XM\_005263031.4 XM\_001656585.2  
XM\_005263077.4 XM\_001653975.2  
XM\_005263166.4 XM\_021844418.1  
XM\_005263372.3 XM\_021844008.1  
XM\_005263403.3 XM\_021840623.1  
XM\_005263449.5 XM\_021843768.1  
XM\_005263462.4 XM\_021852585.1  
XM\_005263547.3 XM\_021854703.1  
XM\_005263548.3 XM\_021842230.1  
XM\_005263629.3 XM\_021851194.1  
XM\_005263710.2 XM\_021847906.1  
XM\_005263862.4 XM\_021837875.1  
XM\_005263921.4 XM\_021852117.1  
XM\_005264203.3 XM\_021850603.1  
XM\_005264230.4 XM\_021856134.1  
XM\_005264283.2 XM\_021840578.1  
XM\_005264318.3 XM\_021854975.1  
XM\_005264421.3 XM\_021840785.1  
XM\_005264459.2 XM\_021847991.1  
XM\_005264487.2 XM\_021855444.1  
XM\_005264843.4 XM\_021847174.1  
XM\_005264921.5 XM\_021852764.1  
XM\_005264940.4 XM\_021845965.1  
XM\_005264968.1 XM\_021841493.1  
XM\_005265098.4 XR\_002501047.1  
XM\_005265379.3 XM\_021846945.1  
XM\_005265587.5 XM\_021853326.1  
XM\_005265653.4 XM\_021854400.1  
XM\_005265673.4 XM\_011495202.2  
XM\_005265967.2 XM\_021847293.1  
XM\_005266050.4 XR\_002499905.1  
XM\_005266419.1 XM\_021839862.1  
XM\_005266460.2 XM\_021853030.1  
XM\_005266461.3 XM\_021850761.1  
XM\_005266464.3 XR\_002499617.1  
XM\_005266583.5 XM\_021838092.1  
XM\_005266642.3 XM\_021839314.1  
XM\_005266970.1 XM\_001657600.2  
XM\_005266983.4 XM\_021850327.1

XM\_005266984.4 XM\_001652859.2  
XM\_005267135.3 XM\_001658478.3  
XM\_005267179.4 XM\_001656854.2  
XM\_005267325.5 XR\_002499915.1  
XM\_005267406.5 XM\_021837242.1  
XM\_005267510.1 XM\_001653593.2  
XM\_005267537.4 XM\_021841417.1  
XM\_005267709.3 XM\_001662893.2  
XM\_005267833.5 XM\_001663446.2  
XM\_005267854.1 XM\_021848829.1  
XM\_005267890.5 XM\_001652292.2  
XM\_005267988.3 XM\_021839154.1  
XM\_005267991.3 XM\_001655512.2  
XM\_005268111.3 XM\_001659699.2  
XM\_005268128.1 XM\_001652543.3  
XM\_005268372.4 XM\_021839999.1  
XM\_005268377.4 XM\_001652075.2  
XM\_005268447.4 XM\_021837702.1  
XM\_005268477.1 XR\_002500305.1  
XM\_005268493.2 XM\_021840205.1  
XM\_005268508.4 XM\_021842343.1  
XM\_005268556.2 XM\_011495423.2  
XM\_005268707.4 XM\_001657252.2  
XM\_005268730.3 XM\_021847183.1  
XM\_005268738.3 XR\_002502086.1  
XM\_005268739.4 XM\_021841631.1  
XM\_005268757.4 XM\_021852584.1  
XM\_005268927.2 XM\_021838463.1  
XM\_005268997.2 XM\_001650331.2  
XM\_005269011.3 XM\_001649612.2  
XM\_005269051.3 XM\_001647841.2  
XM\_005269125.2 XM\_021850959.1  
XM\_005269133.2 XM\_021844910.1  
XM\_005269207.1 XM\_001655529.2  
XM\_005269224.5 XM\_021856048.1  
XM\_005269476.4 XM\_021847739.1  
XM\_005269478.4 XM\_001660865.2  
XM\_005269509.3 XM\_021837938.1  
XM\_005269655.3 XM\_021837863.1  
XM\_005269742.1 XM\_021846043.1  
XM\_005269890.1 XM\_001661198.2  
XM\_005270026.4 XM\_021855798.1  
XM\_005270148.2 XM\_021845320.1  
XM\_005270231.3 XM\_001663007.2  
XM\_005270241.4 XM\_021840934.1  
XM\_005270360.2 XM\_021837822.1  
XM\_005270562.3 XM\_001658325.2  
XM\_005270777.2 XM\_021853633.1  
XM\_005270779.4 XM\_001653309.2  
XM\_005271103.4 XM\_021850125.1

XM\_005271107.2 XM\_001653339.2  
XM\_005271110.2 XM\_021841832.1  
XM\_005271113.5 XM\_021857590.1  
XM\_005271149.4 XR\_002501219.1  
XM\_005271223.3 XM\_021845334.1  
XM\_005271235.3 XR\_002500689.1  
XM\_005271260.5 XM\_021841481.1  
XM\_005271274.4 XM\_021839812.1  
XM\_005271355.3 XM\_021856011.1  
XM\_005271471.3 XM\_021839576.1  
XM\_005271485.3 XM\_021840518.1  
XM\_005271721.5 XM\_021842056.1  
XM\_005271745.4 XR\_002501100.1  
XM\_005271793.4 XM\_001657971.2  
XM\_005271835.4 XR\_002498710.1  
XM\_005271894.3 XM\_021851658.1  
XM\_005272016.4 XM\_001661163.2  
XM\_005272048.4 XM\_001662594.2  
XM\_005272105.4 XM\_021845149.1  
XM\_005272109.5 XM\_001663115.2  
XM\_005272118.4 XM\_021848059.1  
XM\_005272572.4 XM\_001658034.2  
XM\_005273165.4 XM\_021841050.1  
XM\_005273322.4 XM\_001658079.2  
XM\_005273481.3 XM\_021844499.1  
XM\_005273585.4 XM\_021850958.1  
XM\_005273611.4 XM\_021839416.1  
XM\_005273613.4 XM\_021849505.1  
XM\_005273801.4 XM\_001650263.2  
XM\_005273976.2 XM\_021852784.1  
XM\_005274161.1 XR\_002502497.1  
XM\_005274177.3 XM\_021852396.1  
XM\_005274368.2 XR\_002499623.1  
XM\_005274521.4 XR\_002499167.1  
XM\_005274578.2 XM\_021843500.1  
XM\_005274716.3 XM\_001656134.2  
XM\_005274742.2 XM\_021847051.1  
XM\_005274778.3 XM\_001658072.2  
XM\_005276753.5 XM\_021844902.1  
XM\_005276755.5 XM\_021841199.1  
XM\_005276975.5 XM\_021848343.1  
XM\_005278250.5 XR\_002500178.1  
XM\_005278279.2 XR\_002500150.1  
XM\_006710346.3 XM\_021842623.1  
XM\_006710394.4 XM\_021839651.1  
XM\_006710426.3 XM\_021843167.1  
XM\_006710474.3 XM\_021839010.1  
XM\_006710477.3 XM\_021838656.1  
XM\_006710585.3 XM\_001661849.2  
XM\_006710618.3 XM\_021855814.1

XM\_006710631.3 XM\_001664161.2  
XM\_006710731.1 XM\_021853057.1  
XM\_006710859.1 XM\_021852115.1  
XM\_006710922.1 XM\_001661280.2  
XM\_006710995.2 XM\_021839907.1  
XM\_006711174.2 XM\_021839768.1  
XM\_006711221.3 XR\_002502937.1  
XM\_006711253.2 XM\_021853452.1  
XM\_006711356.3 XM\_021857083.1  
XM\_006711567.4 XM\_021850573.1  
XM\_006711643.3 XM\_021838636.1  
XM\_006711929.3 XM\_001657463.2  
XM\_006711995.3 XM\_021848943.1  
XM\_006712021.3 XM\_021839619.1  
XM\_006712030.4 XM\_021844223.1  
XM\_006712094.3 XM\_021857385.1  
XM\_006712182.3 XM\_001654420.2  
XM\_006712196.3 XM\_021847296.1  
XM\_006712208.3 XM\_001651946.2  
XM\_006712286.3 XM\_021843566.1  
XM\_006712301.2 XR\_002500445.1  
XM\_006712336.3 XM\_021857432.1  
XM\_006712417.1 XM\_021840491.1  
XM\_006712521.4 XM\_001658261.2  
XM\_006712551.1 XM\_011494873.2  
XM\_006712639.3 XM\_021843168.1  
XM\_006712797.3 XM\_021849506.1  
XM\_006712799.3 XR\_002499491.1  
XM\_006712802.1 XM\_021846047.1  
XM\_006712946.3 XM\_021847096.1  
XM\_006713041.1 XM\_021854687.1  
XM\_006713204.3 XM\_021853799.1  
XM\_006713318.3 XM\_021851193.1  
XM\_006713417.3 XM\_021850288.1  
XM\_006713435.3 XM\_021845267.1  
XM\_006713472.1 XM\_011495268.2  
XM\_006713603.2 XM\_021853199.1  
XM\_006713684.3 XM\_021848116.1  
XM\_006713760.4 XM\_021843439.1  
XM\_006713831.4 XM\_001661372.2  
XM\_006713986.3 XM\_021854547.1  
XM\_006714116.4 XM\_021839899.1  
XM\_006714158.1 XM\_021841015.1  
XM\_006714165.3 XM\_001656555.2  
XM\_006714177.3 XM\_021840757.1  
XM\_006714231.2 XM\_001655654.2  
XM\_006714306.4 XM\_021857511.1  
XM\_006714420.3 XM\_001656102.2  
XM\_006714464.3 XM\_021857592.1  
XM\_006714532.3 XM\_001649091.2

XM\_006714587.4 XM\_001656675.2  
XM\_006714675.4 XM\_001651525.2  
XM\_006714741.2 XM\_021841719.1  
XM\_006714792.2 XM\_021838054.1  
XM\_006714921.3 XM\_021841413.1  
XM\_006714975.1 XR\_002500754.1  
XM\_006715052.3 XM\_021850127.1  
XM\_006715268.2 XM\_021840756.1  
XM\_006715270.1 XM\_001660287.2  
XM\_006715279.2 XM\_021851641.1  
XM\_006715349.4 XM\_021840784.1  
XM\_006715426.3 XM\_021844547.1  
XM\_006715586.3 XM\_021851443.1  
XM\_006715612.3 XM\_001652605.2  
XM\_006715642.2 XR\_002499121.1  
XM\_006715645.3 XM\_021854117.1  
XM\_006715655.2 XM\_021843812.1  
XM\_006715659.1 XM\_021843299.1  
XM\_006715667.3 XM\_021852441.1  
XM\_006715839.3 XM\_021843100.1  
XM\_006716093.3 XM\_021856520.1  
XM\_006716126.3 XM\_021854549.1  
XM\_006716256.4 XM\_001653441.2  
XM\_006716333.3 XM\_021848247.1  
XM\_006716585.1 XM\_001652227.2  
XM\_006716698.3 XM\_021843152.1  
XM\_006716706.2 XM\_021847533.1  
XM\_006716936.2 XM\_021842447.1  
XM\_006716944.4 XM\_001651790.2  
XM\_006717014.2 XM\_021851881.1  
XM\_006717096.4 XM\_021842926.1  
XM\_006717110.3 XM\_001657205.2  
XM\_006717141.3 XM\_021847930.1  
XM\_006717170.4 XM\_021845298.1  
XM\_006717191.1 XM\_021845299.1  
XM\_006717253.1 XM\_001657538.2  
XM\_006717273.4 XM\_021840908.1  
XM\_006717399.3 XM\_021849049.1  
XM\_006717519.4 XM\_021843806.1  
XM\_006717631.4 XM\_021851191.1  
XM\_006717634.3 XM\_001663097.2  
XM\_006717720.4 XM\_021839684.1  
XM\_006717851.3 XM\_021850188.1  
XM\_006717884.4 XM\_021844595.1  
XM\_006717891.4 XR\_002499918.1  
XM\_006717974.3 XM\_001654934.2  
XM\_006718047.2 XM\_021840787.1  
XM\_006718141.4 XM\_021843807.1  
XM\_006718191.3 XM\_021851237.1  
XM\_006718346.2 XM\_021853488.1

XM\_006718374.2 XM\_001650344.2  
XM\_006718384.2 XM\_021843816.1  
XM\_006718488.4 XR\_002501361.1  
XM\_006718517.2 XM\_021843620.1  
XM\_006718556.4 XM\_021841188.1  
XM\_006718699.3 XM\_001652715.2  
XM\_006718707.3 XM\_021843368.1  
XM\_006718739.2 XM\_021854289.1  
XM\_006718741.2 XM\_021849981.1  
XM\_006718797.3 XM\_021842133.1  
XM\_006718823.2 XM\_021843274.1  
XM\_006718849.4 XM\_001648021.2  
XM\_006718945.3 XM\_021848131.1  
XM\_006719025.4 XM\_021846234.1  
XM\_006719093.1 XM\_021838136.1  
XM\_006719114.3 XM\_021855944.1  
XM\_006719163.4 XM\_021844224.1  
XM\_006719181.2 XM\_001659187.2  
XM\_006719186.4 XM\_001664054.2  
XM\_006719218.1 XR\_002501220.1  
XM\_006719359.1 XM\_021847237.1  
XM\_006719400.4 XM\_021837718.1  
XM\_006719408.4 XM\_021853704.1  
XM\_006719460.4 XM\_021848451.1  
XM\_006719478.2 XM\_021840214.1  
XM\_006719564.2 XM\_021851497.1  
XM\_006719593.3 XM\_021856629.1  
XM\_006719644.2 XM\_021841192.1  
XM\_006719706.2 XM\_021854861.1  
XM\_006719707.4 XM\_021855162.1  
XM\_006719713.4 XR\_002499686.1  
XM\_006719735.1 XM\_001662362.2  
XM\_006719784.3 XR\_002502144.1  
XM\_006719786.3 XM\_021851662.1  
XM\_006719846.3 XM\_021852149.1  
XM\_006719882.1 XM\_021850318.1  
XM\_006719894.3 XM\_021837432.1  
XM\_006719900.2 XM\_021845272.1  
XM\_006719986.2 XM\_001649240.2  
XM\_006719991.4 XM\_021850991.1  
XM\_006720105.3 XM\_021843479.1  
XM\_006720116.4 XM\_021845673.1  
XM\_006720178.1 XM\_021842994.1  
XM\_006720185.3 XM\_021844024.1  
XM\_006720196.2 XM\_021843298.1  
XM\_006720204.1 XM\_021842348.1  
XM\_006720206.4 XM\_021843826.1  
XM\_006720226.3 XM\_001649349.2  
XM\_006720301.3 XM\_021856601.1  
XM\_006720309.1 XM\_021839255.1



XM\_006720355.3 XM\_021852151.1  
XM\_006720420.1 XM\_021840141.1  
XM\_006720459.2 XR\_002499762.1  
XM\_006720539.3 XM\_001659996.2  
XM\_006720626.3 XM\_021851949.1  
XM\_006720751.3 XM\_021845623.1  
XM\_006720832.2 XM\_021837629.1  
XM\_006720867.3 XM\_021844556.1  
XM\_006720908.4 XM\_021840166.1  
XM\_006720954.4 XM\_021838032.1  
XM\_006720982.3 XM\_021849074.1  
XM\_006721067.4 XM\_021853934.1  
XM\_006721074.2 XM\_021847756.1  
XM\_006721084.1 XR\_002501680.1  
XM\_006721236.4 XM\_021857460.1  
XM\_006721295.3 XM\_021846441.1  
XM\_006721471.3 XM\_021840207.1  
XM\_006721515.2 XM\_001649687.2  
XM\_006721546.3 XM\_001661519.2  
XM\_006721573.3 XM\_021856727.1  
XM\_006721601.4 XM\_021846245.1  
XM\_006721671.4 XM\_021846785.1  
XM\_006721707.3 XM\_021854983.1  
XM\_006721750.4 XM\_021840946.1  
XM\_006721866.3 XM\_021848340.1  
XM\_006721885.3 XM\_001662728.2  
XM\_006721893.3 XM\_021849808.1  
XM\_006721896.3 XM\_021838065.1  
XM\_006721907.3 XR\_002498684.1  
XM\_006721916.3 XM\_021850763.1  
XM\_006721920.2 XM\_021854569.1  
XM\_006721930.3 XM\_021857421.1  
XM\_006722018.3 XR\_002498774.1  
XM\_006722026.2 XM\_021855933.1  
XM\_006722115.3 XM\_021838525.1  
XM\_006722291.4 XM\_021847301.1  
XM\_006722425.3 XM\_021843872.1  
XM\_006722435.3 XM\_021842502.1  
XM\_006722521.2 XM\_021846479.1  
XM\_006722547.3 XM\_001654482.2  
XM\_006722557.2 XM\_001652204.2  
XM\_006722597.4 XM\_021848210.1  
XM\_006722616.1 XM\_021838647.1  
XM\_006722647.3 XM\_021847292.1  
XM\_006722706.3 XM\_001657653.2  
XM\_006722741.3 XM\_021843447.1  
XM\_006722782.4 XM\_021841665.1  
XM\_006722855.4 XM\_021839983.1  
XM\_006722866.2 XM\_001656051.2  
XM\_006722899.4 XM\_021844025.1

XM\_006722999.2 XM\_001654508.2  
XM\_006723009.3 XM\_021843875.1  
XM\_006723092.4 XM\_021840554.1  
XM\_006723097.4 XM\_001662429.2  
XM\_006723102.4 XR\_002498791.1  
XM\_006723219.3 XM\_021842452.1  
XM\_006723382.3 XM\_021840591.1  
XM\_006723489.1 XM\_021851939.1  
XM\_006723565.3 XM\_001657662.2  
XM\_006723598.1 XM\_021848149.1  
XM\_006723603.2 XM\_001648353.2  
XM\_006723646.3 XM\_021851111.1  
XM\_006723655.2 XM\_021849408.1  
XM\_006723727.3 XM\_021840556.1  
XM\_006723806.3 XM\_021839449.1  
XM\_006723961.4 XM\_021842340.1  
XM\_006723989.2 XM\_001654021.2  
XM\_006724030.3 XM\_021855518.1  
XM\_006724038.3 XM\_021838315.1  
XM\_006724051.3 XM\_001652900.2  
XM\_006724151.2 XM\_001655239.2  
XM\_006724180.2 XR\_002499550.1  
XM\_006724289.4 XM\_021848954.1  
XM\_006724559.1 XM\_021848604.1  
XM\_006724592.4 XM\_001648264.2  
XM\_006724619.1 XM\_011495371.2  
XM\_006724691.2 XM\_021853374.1  
XM\_006724763.1 XR\_002501823.1  
XM\_006724774.3 XM\_021857411.1  
XM\_006724779.2 XM\_021857518.1  
XM\_006724783.2 XM\_021849625.1  
XM\_006724802.4 XM\_021853033.1  
XM\_006724833.2 XM\_021842451.1  
XM\_006724855.3 XM\_021857134.1  
XM\_011509079.3 XM\_021851799.1  
XM\_011509133.2 XM\_021855575.1  
XM\_011509183.2 XM\_001649285.2  
XM\_011509201.2 XM\_021856955.1  
XM\_011509247.1 XM\_021844005.1  
XM\_011509265.3 XM\_021839521.1  
XM\_011509269.2 XM\_021854379.1  
XM\_011509301.3 XM\_021847865.1  
XM\_011509339.3 XM\_021843845.1  
XM\_011509386.2 XM\_021856591.1  
XM\_011509417.2 XM\_021855670.1  
XM\_011509453.2 XM\_021850214.1  
XM\_011509459.2 XR\_002499956.1  
XM\_011509475.2 XR\_002500393.1  
XM\_011509549.1 XM\_021854946.1  
XM\_011509644.3 XR\_002502434.1

XM\_011509667.2 XM\_021842045.1  
XM\_011509668.2 XM\_021844579.1  
XM\_011509681.1 XM\_021845927.1  
XM\_011509707.2 XM\_021837623.1  
XM\_011509739.2 XM\_021848844.1  
XM\_011509748.2 XM\_021846052.1  
XM\_011509759.3 XM\_001661901.2  
XM\_011509762.3 XM\_021846412.1  
XM\_011509786.1 XM\_021849011.1  
XM\_011509804.1 XM\_021839333.1  
XM\_011509813.2 XM\_021855936.1  
XM\_011509819.1 XR\_002500593.1  
XM\_011509820.2 XR\_002501546.1  
XM\_011509844.2 XM\_021837625.1  
XM\_011509872.2 XM\_001652556.2  
XM\_011509881.2 XR\_002500369.1  
XM\_011509935.1 XM\_021839820.1  
XM\_011510012.1 XM\_001652880.3  
XM\_011510152.2 XM\_021850217.1  
XM\_011510162.2 XM\_021856025.1  
XM\_011510181.2 XM\_021839317.1  
XM\_011510229.3 XM\_001651243.2  
XM\_011510232.2 XR\_002501415.1  
XM\_011510235.2 XM\_001654206.2  
XM\_011510236.1 XR\_002499444.1  
XM\_011510348.1 XM\_021845820.1  
XM\_011510399.2 XM\_001657638.2  
XM\_011510461.3 XM\_021849101.1  
XM\_011510497.2 XM\_001658994.2  
XM\_011510520.1 XM\_021850410.1  
XM\_011510527.3 XM\_001664225.2  
XM\_011510556.2 XM\_021855205.1  
XM\_011510562.2 XM\_021853660.1  
XM\_011510589.1 XM\_021847585.1  
XM\_011510597.3 XM\_001648106.2  
XM\_011510650.3 XR\_002502893.1  
XM\_011510655.3 XM\_001659974.2  
XM\_011510689.3 XM\_021856322.1  
XM\_011510691.2 XM\_021842024.1  
XM\_011510694.2 XM\_001659192.2  
XM\_011510781.3 XM\_021857365.1  
XM\_011510789.2 XM\_021839063.1  
XM\_011510919.1 XM\_021857061.1  
XM\_011510938.1 XM\_021849464.1  
XM\_011511090.3 XM\_021837359.1  
XM\_011511196.3 XM\_021839130.1  
XM\_011511249.3 XM\_021849102.1  
XM\_011511285.2 XM\_021840427.1  
XM\_011511325.3 XM\_021846523.1  
XM\_011511358.2 XR\_002501481.1

XM\_011511369.3 XM\_021839808.1  
XM\_011511379.2 XM\_021851162.1  
XM\_011511434.3 XM\_001652467.2  
XM\_011511445.2 XM\_021857239.1  
XM\_011511489.2 XM\_021857517.1  
XM\_011511494.3 XM\_021843260.1  
XM\_011511535.3 XM\_021843396.1  
XM\_011511738.3 XM\_021839842.1  
XM\_011511827.2 XM\_021845891.1  
XM\_011511933.1 XM\_001654684.2  
XM\_011511937.1 XM\_021850863.1  
XM\_011511958.3 XM\_021846210.1  
XM\_011511982.1 XR\_002498858.1  
XM\_011511993.2 XM\_021843732.1  
XM\_011511996.2 XM\_021854290.1  
XM\_011512005.2 XM\_021856729.1  
XM\_011512026.3 XM\_001658900.2  
XM\_011512148.2 XM\_021855953.1  
XM\_011512213.2 XM\_021854805.1  
XM\_011512226.2 XM\_021849664.1  
XM\_011512274.1 XM\_001662595.2  
XM\_011512277.2 XM\_021837974.1  
XM\_011512315.1 XM\_021849426.1  
XM\_011512323.2 XR\_002499242.1  
XM\_011512331.2 XM\_021846908.1  
XM\_011512424.2 XM\_021843810.1  
XM\_011512432.2 XM\_021848817.1  
XM\_011512488.2 XM\_001655499.2  
XM\_011512561.2 XM\_021853990.1  
XM\_011512615.3 XM\_021843562.1  
XM\_011512627.3 XM\_021857271.1  
XM\_011512660.2 XR\_002501444.1  
XM\_011512671.2 XM\_021856666.1  
XM\_011512711.2 XM\_021839815.1  
XM\_011512795.3 XR\_002500301.1  
XM\_011512807.2 XM\_021856222.1  
XM\_011512823.2 XM\_021845537.1  
XM\_011512842.2 XM\_001660084.2  
XM\_011512857.2 XR\_002499068.1  
XM\_011512891.2 XM\_001656600.2  
XM\_011512912.2 XM\_021846469.1  
XM\_011512958.3 XM\_001648426.2  
XM\_011513042.3 XM\_001663436.2  
XM\_011513050.2 XM\_001661316.2  
XM\_011513353.3 XM\_021845978.1  
XM\_011513356.3 XM\_001658017.2  
XM\_011513427.2 XM\_021839644.1  
XM\_011513454.2 XM\_021846784.1  
XM\_011513590.2 XM\_021838321.1  
XM\_011513682.3 XM\_021853056.1

XM\_011513719.2 XM\_021839796.1  
XM\_011513753.2 XM\_001651589.2  
XM\_011513811.2 XM\_021853952.1  
XM\_011513821.3 XM\_021843814.1  
XM\_011513835.2 XM\_021844534.1  
XM\_011513840.3 XM\_021843533.1  
XM\_011513856.3 XM\_001649994.2  
XM\_011513865.2 XM\_001652354.2  
XM\_011513908.2 XM\_001651256.2  
XM\_011513909.2 XM\_001660053.3  
XM\_011513975.2 XR\_002501399.1  
XM\_011513979.2 XM\_021854404.1  
XM\_011514025.2 XM\_001660734.2  
XM\_011514067.1 XM\_021851532.1  
XM\_011514094.2 XM\_021857189.1  
XM\_011514152.2 XM\_021838681.1  
XM\_011514225.1 XM\_001661543.2  
XM\_011514248.3 XM\_011495417.2  
XM\_011514264.1 XM\_021853765.1  
XM\_011514335.2 XM\_021845773.1  
XM\_011514346.3 XM\_001658227.2  
XM\_011514395.2 XM\_001648969.2  
XM\_011514420.2 XM\_021856417.1  
XM\_011514425.1 XM\_001651346.2  
XM\_011514428.1 XM\_021847042.1  
XM\_011514437.3 XM\_021855906.1  
XM\_011514459.2 XM\_021855615.1  
XM\_011514506.2 XM\_021843760.1  
XM\_011514615.2 XM\_021841026.1  
XM\_011514624.2 XM\_021854878.1  
XM\_011514663.1 XM\_021857600.1  
XM\_011514665.1 XM\_021841247.1  
XM\_011514726.2 XM\_021852948.1  
XM\_011514767.2 XM\_001657693.2  
XM\_011514770.1 XM\_021839141.1  
XM\_011514780.1 XM\_021843563.1  
XM\_011514812.2 XM\_001651827.2  
XM\_011514854.2 XM\_021842647.1  
XM\_011514859.1 XM\_021842753.1  
XM\_011514873.2 XM\_021855393.1  
XM\_011514917.2 XM\_001663465.2  
XM\_011514937.2 XM\_021854502.1  
XM\_011514938.2 XM\_001649646.2  
XM\_011514953.3 XM\_021842788.1  
XM\_011515081.2 XM\_001650392.2  
XM\_011515087.1 XM\_001648941.2  
XM\_011515151.3 XM\_001654834.2  
XM\_011515154.2 XM\_021852968.1  
XM\_011515213.2 XM\_021850319.1  
XM\_011515223.2 XM\_021847492.1

XM\_011515231.2 XM\_021842448.1  
XM\_011515241.1 XM\_021853355.1  
XM\_011515402.3 XM\_021845408.1  
XM\_011515407.2 XM\_021843606.1  
XM\_011515443.2 XM\_021842083.1  
XM\_011515444.2 XM\_021847975.1  
XM\_011515458.2 XM\_021851190.1  
XM\_011515527.3 XM\_021850961.1  
XM\_011515555.1 XM\_001649754.2  
XM\_011515556.1 XM\_021850306.1  
XM\_011515572.1 XM\_001651480.2  
XM\_011515582.3 XM\_001650614.2  
XM\_011515583.2 XM\_021850875.1  
XM\_011515654.2 XM\_021845565.1  
XM\_011515778.1 XM\_021845850.1  
XM\_011515795.2 XM\_001654278.2  
XM\_011515821.2 XM\_001660085.2  
XM\_011515826.1 XM\_001656929.2  
XM\_011515921.1 XM\_001657318.2  
XM\_011515964.2 XM\_021845604.1  
XM\_011515969.1 XM\_021841583.1  
XM\_011515990.2 XM\_021839871.1  
XM\_011515994.1 XM\_021845555.1  
XM\_011516031.1 XM\_001657792.2  
XM\_011516053.2 XR\_002498701.1  
XM\_011516066.3 XM\_021847549.1  
XM\_011516076.2 XM\_021856314.1  
XM\_011516102.2 XM\_021843819.1  
XM\_011516159.3 XM\_021846254.1  
XM\_011516190.2 XM\_021837687.1  
XM\_011516259.2 XR\_002498837.1  
XM\_011516283.1 XM\_021850307.1  
XM\_011516290.2 XM\_001655220.2  
XM\_011516609.2 XR\_002498999.1  
XM\_011516640.2 XM\_001661169.2  
XM\_011516669.3 XM\_021845536.1  
XM\_011516672.2 XM\_021849390.1  
XM\_011516737.1 XM\_021838824.1  
XM\_011516798.1 XM\_001661387.2  
XM\_011516926.2 XM\_001662181.2  
XM\_011516939.3 XM\_001653333.2  
XM\_011516944.2 XM\_021840330.1  
XM\_011517022.2 XM\_021853955.1  
XM\_011517048.2 XM\_021843867.1  
XM\_011517136.2 XM\_021845925.1  
XM\_011517202.2 XM\_021838537.1  
XM\_011517214.1 XM\_021847580.1  
XM\_011517219.1 XM\_021842485.1  
XM\_011517239.2 XM\_021853800.1  
XM\_011517257.2 XM\_021851165.1

XM\_011517259.2 XM\_001660971.2  
XM\_011517269.1 XM\_021848841.1  
XM\_011517274.2 XM\_021855883.1  
XM\_011517312.2 XM\_021856746.1  
XM\_011517361.2 XR\_002500238.1  
XM\_011517363.3 XM\_021845601.1  
XM\_011517495.2 XR\_002501578.1  
XM\_011517509.3 XM\_001656595.2  
XM\_011517539.3 XM\_001662561.2  
XM\_011517570.2 XM\_001662238.2  
XM\_011517588.3 XM\_021851643.1  
XM\_011517592.3 XM\_021841844.1  
XM\_011517616.2 XM\_001648539.2  
XM\_011517625.2 XM\_021846704.1  
XM\_011517635.1 XM\_001656358.2  
XM\_011517676.2 XR\_002502126.1  
XM\_011517736.3 XM\_021839553.1  
XM\_011517744.1 XM\_021838667.1  
XM\_011517861.2 XM\_021846786.1  
XM\_011517863.3 XM\_021840351.1  
XM\_011517963.1 XM\_011495400.2  
XM\_011518067.1 XM\_001660843.2  
XM\_011518070.2 XM\_021850121.1  
XM\_011518088.2 XM\_021847319.1  
XM\_011518153.1 XM\_021852591.1  
XM\_011518168.2 XM\_001663903.2  
XM\_011518189.3 XM\_021844553.1  
XM\_011518209.3 XM\_021848815.1  
XM\_011518233.2 XM\_001647859.2  
XM\_011518257.2 XM\_021847899.1  
XM\_011518277.2 XM\_021849406.1  
XM\_011518294.3 XM\_001655888.2  
XM\_011518341.3 XM\_001654831.2  
XM\_011518345.3 XM\_021851034.1  
XM\_011518352.1 XM\_021838788.1  
XM\_011518353.1 XM\_021853348.1  
XM\_011518361.2 XM\_021853045.1  
XM\_011518366.3 XM\_021852785.1  
XM\_011518374.2 XM\_021851784.1  
XM\_011518406.2 XR\_002500065.1  
XM\_011518488.2 XM\_021841488.1  
XM\_011518573.3 XM\_021846460.1  
XM\_011518584.1 XM\_001663395.2  
XM\_011518600.1 XM\_021854788.1  
XM\_011518639.1 XM\_021854164.1  
XM\_011518650.3 XM\_021848068.1  
XM\_011518770.2 XM\_021842786.1  
XM\_011518838.2 XM\_021843448.1  
XM\_011518875.2 XM\_021854405.1  
XM\_011518903.3 XR\_002501607.1

XM\_011518907.2 XM\_021856352.1  
XM\_011518909.2 XM\_011495081.2  
XM\_011518925.1 XM\_001655284.2  
XM\_011518950.2 XM\_021856795.1  
XM\_011519016.1 XM\_001663420.2  
XM\_011519089.3 XM\_021852868.1  
XM\_011519091.3 XM\_021847884.1  
XM\_011519114.2 XM\_021852316.1  
XM\_011519134.3 XM\_001659450.2  
XM\_011519152.3 XM\_021850590.1  
XM\_011519208.2 XR\_002499778.1  
XM\_011519214.2 XM\_021837263.1  
XM\_011519224.1 XM\_021856220.1  
XM\_011519230.2 XM\_001659538.2  
XM\_011519241.2 XR\_002502405.1  
XM\_011519264.2 XM\_021847789.1  
XM\_011519297.1 XM\_021850302.1  
XM\_011519306.2 XM\_021841209.1  
XM\_011519330.2 XM\_021840399.1  
XM\_011519337.2 XM\_001656861.2  
XM\_011519372.2 XM\_021837367.1  
XM\_011519398.2 XM\_021850614.1  
XM\_011519405.2 XM\_001663245.2  
XM\_011519503.1 XM\_021848701.1  
XM\_011519519.3 XM\_021845347.1  
XM\_011519538.2 XR\_002503000.1  
XM\_011519564.2 XR\_002501732.1  
XM\_011519604.2 XM\_021847581.1  
XM\_011519628.1 XM\_021852835.1  
XM\_011519672.1 XM\_021849080.1  
XM\_011519674.1 XM\_021841816.1  
XM\_011519710.2 XM\_021849418.1  
XM\_011519720.2 XM\_021851096.1  
XM\_011519743.1 XM\_001660863.2  
XM\_011519830.3 XR\_002501412.1  
XM\_011519863.1 XM\_021854696.1  
XM\_011519873.3 XM\_021846472.1  
XM\_011519890.1 XM\_001659383.3  
XM\_011519898.3 XM\_021848117.1  
XM\_011519907.2 XM\_021850284.1  
XM\_011519921.2 XM\_021840282.1  
XM\_011519941.2 XM\_021848938.1  
XM\_011520048.1 XM\_021848875.1  
XM\_011520209.3 XM\_021843345.1  
XM\_011520295.2 XM\_021856049.1  
XM\_011520302.3 XM\_001656876.2  
XM\_011520338.1 XM\_021839232.1  
XM\_011520373.3 XM\_001656354.2  
XM\_011520379.2 XM\_001654500.3  
XM\_011520406.2 XM\_021839074.1



XM\_011520476.2 XM\_001657220.2  
XM\_011520485.2 XM\_021854378.1  
XM\_011520493.2 XM\_021853298.1  
XM\_011520524.1 XM\_021856095.1  
XM\_011520560.2 XR\_002501063.1  
XM\_011520623.3 XM\_021840880.1  
XM\_011520747.2 XM\_021837998.1  
XM\_011520751.3 XM\_021848816.1  
XM\_011520760.2 XR\_002499536.1  
XM\_011520802.2 XM\_021857722.1  
XM\_011520815.3 XM\_021841150.1  
XM\_011520934.3 XM\_001656090.3  
XM\_011520997.3 XM\_021841804.1  
XM\_011521100.2 XM\_021839290.1  
XM\_011521166.2 XM\_011494692.2  
XM\_011521186.2 XM\_001649186.2  
XM\_011521243.3 XM\_021847152.1  
XM\_011521249.2 XM\_021855909.1  
XM\_011521262.2 XM\_001647840.2  
XM\_011521271.2 XM\_021847328.1  
XM\_011521320.1 XM\_021849013.1  
XM\_011521345.3 XM\_001656139.2  
XM\_011521351.2 XM\_021846449.1  
XM\_011521363.2 XM\_021855396.1  
XM\_011521366.2 XM\_001653872.2  
XM\_011521381.2 XM\_021846780.1  
XM\_011521396.2 XM\_001658537.2  
XM\_011521403.2 XM\_021847424.1  
XM\_011521497.2 XM\_001651344.3  
XM\_011521505.2 XM\_001650219.2  
XM\_011521556.2 XM\_021838040.1  
XM\_011521587.2 XM\_001652154.2  
XM\_011521591.2 XM\_001648885.2  
XM\_011521611.3 XM\_001661830.2  
XM\_011521620.3 XM\_021845794.1  
XM\_011521656.3 XM\_021846946.1  
XM\_011521660.3 XM\_021855790.1  
XM\_011521664.2 XM\_001658944.2  
XM\_011521665.2 XM\_021846950.1  
XM\_011521668.2 XM\_021846429.1  
XM\_011521670.2 XM\_021850507.1  
XM\_011521690.2 XM\_021855816.1  
XM\_011521780.3 XM\_001661359.2  
XM\_011521805.2 XM\_001661816.2  
XM\_011521852.1 XM\_021845837.1  
XM\_011521884.1 XM\_021841145.1  
XM\_011521893.1 XM\_021841965.1  
XM\_011521951.3 XM\_021842488.1  
XM\_011521976.3 XM\_021843627.1  
XM\_011522009.2 XM\_001662643.2

XM\_011522020.1 XM\_021839407.1  
XM\_011522023.1 XM\_021840032.1  
XM\_011522028.1 XM\_001664198.2  
XM\_011522034.2 XM\_001651358.2  
XM\_011522037.2 XM\_021848874.1  
XM\_011522044.2 XM\_021840329.1  
XM\_011522071.1 XM\_021852141.1  
XM\_011522076.2 XM\_021857287.1  
XM\_011522088.1 XM\_021845988.1  
XM\_011522125.3 XM\_021846951.1  
XM\_011522192.2 XM\_021847873.1  
XM\_011522204.3 XR\_002502557.1  
XM\_011522232.2 XM\_001650616.2  
XM\_011522234.3 XM\_021848244.1  
XM\_011522244.1 XR\_002500357.1  
XM\_011522351.2 XM\_021846859.1  
XM\_011522402.1 XM\_021854417.1  
XM\_011522516.3 XM\_021838629.1  
XM\_011522580.2 XM\_011494999.2  
XM\_011522608.2 XR\_002503088.1  
XM\_011522727.3 XM\_021847441.1  
XM\_011522783.2 XM\_021850419.1  
XM\_011522823.2 XM\_001649512.2  
XM\_011522836.2 XM\_021837976.1  
XM\_011522914.2 XM\_001661854.2  
XM\_011522921.2 XM\_021843216.1  
XM\_011523002.2 XM\_001658139.2  
XM\_011523023.2 XM\_021842132.1  
XM\_011523041.2 XM\_001648293.2  
XM\_011523095.2 XM\_021847543.1  
XM\_011523176.2 XM\_021840720.1  
XM\_011523178.2 XM\_021837738.1  
XM\_011523214.2 XM\_001662600.2  
XM\_011523222.2 XM\_021857475.1  
XM\_011523229.1 XM\_021854443.1  
XM\_011523230.2 XM\_021846240.1  
XM\_011523232.2 XM\_021849499.1  
XM\_011523243.1 XM\_021838706.1  
XM\_011523289.1 XM\_021846943.1  
XM\_011523294.2 XR\_002498744.1  
XM\_011523321.1 XM\_021843597.1  
XM\_011523326.1 XM\_001658376.2  
XM\_011523352.1 XM\_021842920.1  
XM\_011523353.1 XM\_021854526.1  
XM\_011523541.2 XM\_021840930.1  
XM\_011523597.2 XM\_021846484.1  
XM\_011523691.2 XM\_021851514.1  
XM\_011523713.2 XM\_021845897.1  
XM\_011523724.1 XM\_001648859.2  
XM\_011523738.2 XM\_021838879.1

XM\_011523752.3 XM\_021857368.1  
XM\_011523774.2 XM\_021849729.1  
XM\_011523851.2 XM\_021852966.1  
XM\_011523902.3 XR\_002501617.1  
XM\_011523910.2 XM\_001652999.2  
XM\_011523945.2 XM\_021846534.1  
XM\_011523963.1 XM\_021849578.1  
XM\_011523966.1 XM\_021844294.1  
XM\_011523992.3 XM\_021853238.1  
XM\_011524045.2 XM\_021848939.1  
XM\_011524057.2 XM\_021849784.1  
XM\_011524077.3 XM\_021851261.1  
XM\_011524080.2 XM\_001651707.2  
XM\_011524102.3 XM\_021844958.1  
XM\_011524104.2 XM\_021853688.1  
XM\_011524109.3 XM\_021857614.1  
XM\_011524114.3 XM\_021846410.1  
XM\_011524173.1 XM\_021856076.1  
XM\_011524194.1 XM\_021854154.1  
XM\_011524234.1 XM\_001661964.2  
XM\_011524258.1 XM\_001662776.2  
XM\_011524291.1 XM\_001649616.2  
XM\_011524296.2 XM\_021846161.1  
XM\_011524339.2 XM\_021841509.1  
XM\_011524390.2 XM\_021846783.1  
XM\_011524448.2 XM\_021839190.1  
XM\_011524453.1 XM\_021853801.1  
XM\_011524467.2 XM\_021844954.1  
XM\_011524493.1 XM\_021842206.1  
XM\_011524496.2 XM\_021852862.1  
XM\_011524521.2 XR\_002499043.1  
XM\_011524555.2 XM\_021837979.1  
XM\_011524667.2 XM\_021842492.1  
XM\_011524688.3 XM\_021844820.1  
XM\_011524701.1 XM\_021841582.1  
XM\_011524846.3 XM\_001660356.2  
XM\_011524896.2 XM\_001652774.2  
XM\_011524929.2 XM\_021843854.1  
XM\_011524950.2 XM\_021853450.1  
XM\_011524957.2 XM\_021850144.1  
XM\_011525065.2 XM\_021845836.1  
XM\_011525082.3 XM\_001663485.2  
XM\_011525102.3 XR\_002502335.1  
XM\_011525118.2 XM\_021842003.1  
XM\_011525139.2 XM\_021847583.1  
XM\_011525162.2 XM\_021844119.1  
XM\_011525183.2 XM\_021848571.1  
XM\_011525211.3 XM\_021853180.1  
XM\_011525216.1 XM\_021844039.1  
XM\_011525242.2 XM\_021841510.1

XM\_011525453.2 XM\_021842029.1  
XM\_011525454.3 XM\_021841392.1  
XM\_011525475.3 XM\_021844935.1  
XM\_011525478.2 XM\_001652219.2  
XM\_011525480.2 XM\_001659116.2  
XM\_011525495.2 XM\_021848702.1  
XM\_011525504.3 XM\_001661307.2  
XM\_011525525.1 XM\_021853183.1  
XM\_011525542.1 XM\_021850321.1  
XM\_011525569.2 XM\_021857115.1  
XM\_011525603.2 XM\_021853993.1  
XM\_011525757.1 XM\_021841273.1  
XM\_011525804.2 XM\_021848550.1  
XM\_011525917.3 XM\_021843954.1  
XM\_011525932.1 XM\_021848238.1  
XM\_011525933.2 XM\_021838245.1  
XM\_011526007.2 XM\_021854004.1  
XM\_011526099.2 XR\_002499191.1  
XM\_011526132.2 XM\_021848261.1  
XM\_011526142.1 XM\_021846033.1  
XM\_011526150.2 XM\_001662356.2  
XM\_011526169.3 XM\_021839827.1  
XM\_011526201.2 XM\_021837837.1  
XM\_011526290.2 XM\_021841251.1  
XM\_011526335.2 XM\_021853558.1  
XM\_011526371.2 XM\_021844889.1  
XM\_011526391.1 XM\_001650283.2  
XM\_011526484.2 XM\_001649955.2  
XM\_011526517.2 XM\_021842878.1  
XM\_011526555.3 XM\_021843989.1  
XM\_011526603.2 XM\_001658954.2  
XM\_011526611.2 XM\_021842386.1  
XM\_011526664.2 XM\_021838474.1  
XM\_011526842.1 XM\_021838936.1  
XM\_011526846.1 XM\_021846778.1  
XM\_011526861.3 XM\_021841266.1  
XM\_011526867.1 XM\_021853643.1  
XM\_011526874.2 XM\_021840553.1  
XM\_011526973.2 XM\_021854235.1  
XM\_011526980.3 XM\_001662100.2  
XM\_011526990.2 XM\_021848515.1  
XM\_011527048.3 XM\_001656034.2  
XM\_011527071.1 XM\_021855006.1  
XM\_011527085.2 XM\_021838201.1  
XM\_011527087.2 XM\_021838183.1  
XM\_011527116.1 XM\_021848245.1  
XM\_011527119.1 XM\_021853093.1  
XM\_011527134.1 XM\_001660472.2  
XM\_011527156.2 XR\_002500131.1  
XM\_011527162.2 XM\_001660001.2

XM\_011527170.1 XM\_001654790.2  
XM\_011527215.1 XR\_002498976.1  
XM\_011527228.3 XM\_021851909.1  
XM\_011527297.2 XM\_001659872.2  
XM\_011527341.2 XM\_021837893.1  
XM\_011527368.2 XM\_021846594.1  
XM\_011527370.2 XM\_001653246.2  
XM\_011527397.2 XM\_021846475.1  
XM\_011527424.3 XM\_021843275.1  
XM\_011527428.1 XM\_021839098.1  
XM\_011527432.3 XM\_001657561.2  
XM\_011527436.1 XM\_021844665.1  
XM\_011527560.2 XM\_001654457.2  
XM\_011527682.2 XM\_021849065.1  
XM\_011527710.3 XM\_001660293.2  
XM\_011527831.2 XM\_021840226.1  
XM\_011527861.1 XM\_001650735.2  
XM\_011527885.3 XM\_021850317.1  
XM\_011527897.3 XM\_021838916.1  
XM\_011527903.3 XM\_001654933.2  
XM\_011527909.3 XM\_021845319.1  
XM\_011527917.1 XR\_002500735.1  
XM\_011527934.1 XM\_021847579.1  
XM\_011527967.2 XM\_001650583.2  
XM\_011527974.2 XM\_001652268.2  
XM\_011527982.3 XM\_011495114.2  
XM\_011528042.2 XM\_021840496.1  
XM\_011528069.2 XM\_021848923.1  
XM\_011528090.2 XM\_021848749.1  
XM\_011528094.1 XM\_021854632.1  
XM\_011528136.1 XM\_021837236.1  
XM\_011528167.2 XM\_001650125.2  
XM\_011528177.2 XM\_001655126.2  
XM\_011528272.2 XR\_002499770.1  
XM\_011528278.2 XM\_021850650.1  
XM\_011528279.2 XM\_021846965.1  
XM\_011528281.2 XM\_021853973.1  
XM\_011528293.2 XM\_021853086.1  
XM\_011528442.2 XM\_001658471.2  
XM\_011528449.3 XM\_021841244.1  
XM\_011528481.3 XM\_021839527.1  
XM\_011528526.2 XM\_001647723.2  
XM\_011528527.2 XM\_021848898.1  
XM\_011528529.3 XM\_021839243.1  
XM\_011528545.1 XM\_001654514.2  
XM\_011528566.2 XR\_002499475.1  
XM\_011528586.2 XM\_021853893.1  
XM\_011528747.2 XM\_021840288.1  
XM\_011528748.2 XM\_021853815.1  
XM\_011528768.3 XM\_001660114.2

XM\_011528994.2 XM\_021857536.1  
XM\_011528997.3 XM\_021838187.1  
XM\_011529049.1 XM\_021841231.1  
XM\_011529085.2 XM\_021841156.1  
XM\_011529100.2 XM\_021842941.1  
XM\_011529140.2 XM\_001648401.2  
XM\_011529182.2 XM\_001658414.2  
XM\_011529263.2 XM\_001650180.2  
XM\_011529277.2 XM\_021845305.1  
XM\_011529342.2 XM\_021850280.1  
XM\_011529358.3 XM\_021849574.1  
XM\_011529467.1 XM\_021844666.1  
XM\_011529471.1 XM\_021848087.1  
XM\_011529507.3 XM\_001659135.2  
XM\_011529510.2 XM\_001663443.2  
XM\_011529514.3 XM\_021855334.1  
XM\_011529544.2 XM\_021847241.1  
XM\_011529609.2 XM\_001652735.2  
XM\_011529637.2 XM\_021840717.1  
XM\_011529644.1 XM\_021841835.1  
XM\_011529662.2 XM\_001657634.2  
XM\_011529766.2 XM\_021842694.1  
XM\_011529768.2 XR\_002502196.1  
XM\_011529841.1 XM\_021838221.1  
XM\_011529900.2 XM\_021841806.1  
XM\_011529908.2 XM\_021855294.1  
XM\_011529914.2 XM\_021849082.1  
XM\_011529921.3 XR\_002500873.1  
XM\_011529938.2 XM\_021857145.1  
XM\_011529954.2 XM\_021838653.1  
XM\_011529955.1 XM\_021851808.1  
XM\_011529965.2 XM\_021837516.1  
XM\_011530012.1 XM\_001658338.2  
XM\_011530038.2 XM\_021854634.1  
XM\_011530050.2 XM\_021841508.1  
XM\_011530106.1 XM\_001650488.2  
XM\_011530200.2 XM\_021848171.1  
XM\_011530204.1 XM\_001650950.2  
XM\_011530208.2 XM\_021843591.1  
XM\_011530260.3 XM\_021851588.1  
XM\_011530290.2 XM\_021842977.1  
XM\_011530311.1 XM\_021837655.1  
XM\_011530377.2 XM\_021855071.1  
XM\_011530432.2 XR\_002502662.1  
XM\_011530435.2 XM\_001657378.2  
XM\_011530472.2 XM\_021840711.1  
XM\_011530557.2 XM\_021849814.1  
XM\_011530696.1 XM\_021845456.1  
XM\_011530697.1 XM\_021857324.1  
XM\_011530716.2 XM\_021854787.1

XM\_011530717.2 XM\_001658546.2  
XM\_011530735.2 XM\_001652505.2  
XM\_011530813.1 XM\_021837902.1  
XM\_011530848.3 XM\_021837731.1  
XM\_011530884.1 XM\_021852275.1  
XM\_011530912.2 XR\_002499697.1  
XM\_011530950.2 XM\_021841254.1  
XM\_011530957.3 XM\_021857309.1  
XM\_011530977.1 XM\_021850338.1  
XM\_011530994.1 XM\_021839922.1  
XM\_011531032.1 XR\_002499213.1  
XM\_011531140.2 XM\_021848390.1  
XM\_011531171.1 XM\_021857288.1  
XM\_011531311.2 XM\_001649521.2  
XM\_011531317.3 XM\_001658275.2  
XM\_011531407.3 XM\_021845271.1  
XM\_011531412.3 XM\_021845963.1  
XM\_011531486.2 XM\_001654422.2  
XM\_011531509.3 XR\_002501834.1  
XM\_011531532.2 XM\_021843170.1  
XM\_011531533.2 XM\_021848752.1  
XM\_011531563.2 XM\_021855192.1  
XM\_011531587.3 XM\_021853582.1  
XM\_011531663.3 XM\_021851723.1  
XM\_011531671.2 XM\_021847239.1  
XM\_011531679.3 XM\_021857215.1  
XM\_011531693.2 XM\_001652577.2  
XM\_011531695.3 XM\_021839100.1  
XM\_011531716.3 XM\_021852287.1  
XM\_011531725.1 XR\_002501160.1  
XM\_011531775.1 XM\_021839019.1  
XM\_011531868.3 XM\_021856416.1  
XM\_011531895.2 XM\_021847929.1  
XM\_011531903.2 XM\_001655931.2  
XM\_011531912.2 XM\_001658501.2  
XM\_011532004.1 XM\_021838052.1  
XM\_011532022.2 XM\_021843637.1  
XM\_011532075.1 XM\_021841239.1  
XM\_011532088.2 XR\_002499548.1  
XM\_011532102.1 XM\_021850736.1  
XM\_011532118.3 XM\_021857686.1  
XM\_011532128.2 XM\_021846894.1  
XM\_011532130.1 XM\_001663692.2  
XM\_011532162.2 XM\_021854233.1  
XM\_011532233.3 XM\_021846833.1  
XM\_011532267.2 XM\_021850273.1  
XM\_011532358.2 XR\_002503161.1  
XM\_011532383.2 XR\_002503006.1  
XM\_011532386.2 XM\_021853100.1  
XM\_011532399.2 XR\_002499472.1

XM\_011532400.2 XM\_021857701.1  
XM\_011532505.2 XM\_021844577.1  
XM\_011532551.2 XM\_021846589.1  
XM\_011532566.2 XM\_021854667.1  
XM\_011532571.2 XM\_021852723.1  
XM\_011532623.2 XM\_021855079.1  
XM\_011532642.2 XM\_021843155.1  
XM\_011532716.3 XM\_001658787.2  
XM\_011532721.2 XM\_021846838.1  
XM\_011532730.3 XM\_021844662.1  
XM\_011532736.2 XR\_002500683.1  
XM\_011532766.1 XM\_021843276.1  
XM\_011532819.2 XM\_021845123.1  
XM\_011532919.3 XM\_021857196.1  
XM\_011532963.3 XM\_021846434.1  
XM\_011533045.2 XM\_001650222.2  
XM\_011533150.3 XM\_001654370.2  
XM\_011533154.2 XM\_021848863.1  
XM\_011533166.3 XR\_002501149.1  
XM\_011533268.1 XM\_021842921.1  
XM\_011533286.2 XM\_021851030.1  
XM\_011533371.1 XM\_021845600.1  
XM\_011533394.3 XM\_021850722.1  
XM\_011533433.2 XR\_002499456.1  
XM\_011533445.2 XR\_002500793.1  
XM\_011533478.2 XM\_001664240.2  
XM\_011533547.3 XM\_021851167.1  
XM\_011533576.2 XM\_021856105.1  
XM\_011533615.2 XM\_021848737.1  
XM\_011533625.3 XM\_001657053.3  
XM\_011533747.3 XM\_021838913.1  
XM\_011533774.1 XM\_021855057.1  
XM\_011533782.2 XM\_021855236.1  
XM\_011533834.1 XM\_021839467.1  
XM\_011533928.1 XR\_002502529.1  
XM\_011533980.1 XM\_021854162.1  
XM\_011533990.3 XM\_021847449.1  
XM\_011533991.2 XM\_001661094.2  
XM\_011534070.1 XM\_021848600.1  
XM\_011534079.1 XM\_021856287.1  
XM\_011534097.2 XM\_021851791.1  
XM\_011534099.2 XM\_001649179.2  
XM\_011534113.2 XM\_021852830.1  
XM\_011534152.2 XM\_021845413.1  
XM\_011534192.2 XM\_001651697.2  
XM\_011534200.3 XM\_021843949.1  
XM\_011534307.2 XM\_021857006.1  
XM\_011534382.2 XM\_021851374.1  
XM\_011534478.3 XM\_021839049.1  
XM\_011534485.1 XM\_021845491.1



XM\_011534487.1 XM\_021848264.1  
XM\_011534568.2 XM\_021850428.1  
XM\_011534637.2 XM\_021840721.1  
XM\_011534699.2 XM\_011494733.2  
XM\_011534780.2 XM\_021852079.1  
XM\_011534793.2 XM\_021854773.1  
XM\_011534836.3 XM\_021853974.1  
XM\_011534898.2 XM\_021846261.1  
XM\_011534905.1 XM\_001658364.2  
XM\_011534924.3 XM\_001661757.2  
XM\_011534931.1 XM\_021839340.1  
XM\_011534932.2 XM\_021848118.1  
XM\_011534956.2 XM\_001648077.2  
XM\_011535032.3 XM\_021848211.1  
XM\_011535144.2 XM\_021856046.1  
XM\_011535158.2 XM\_021852969.1  
XM\_011535206.1 XR\_002499461.1  
XM\_011535231.2 XR\_002499395.1  
XM\_011535239.3 XM\_021840347.1  
XM\_011535266.2 XM\_001652046.2  
XM\_011535393.3 XM\_021852588.1  
XM\_011535438.2 XM\_021847900.1  
XM\_011535439.2 XM\_021849056.1  
XM\_011535520.1 XM\_021856801.1  
XM\_011535524.2 XM\_021852946.1  
XM\_011535563.2 XR\_002502068.1  
XM\_011535575.3 XM\_021839354.1  
XM\_011535604.3 XM\_021847850.1  
XM\_011535632.2 XM\_021842040.1  
XM\_011535679.3 XM\_011495126.2  
XM\_011535685.3 XM\_021853207.1  
XM\_011535820.2 XM\_001651457.2  
XM\_011535863.1 XM\_021842067.1  
XM\_011535868.2 XM\_021846814.1  
XM\_011535877.3 XM\_001654428.2  
XM\_011535918.3 XM\_001653632.3  
XM\_011535921.2 XM\_021854821.1  
XM\_011535939.2 XM\_021846415.1  
XM\_011535977.2 XM\_021854755.1  
XM\_011536005.3 XR\_002500104.1  
XM\_011536057.3 XM\_021841497.1  
XM\_011536066.1 XM\_001658924.2  
XM\_011536106.2 XM\_001654982.2  
XM\_011536176.2 XM\_021847407.1  
XM\_011536196.3 XM\_021852949.1  
XM\_011536227.2 XM\_021843701.1  
XM\_011536365.2 XM\_001650154.2  
XM\_011536383.2 XM\_021855080.1  
XM\_011536406.2 XM\_021846702.1  
XM\_011536475.2 XM\_001653035.2

XM\_011536522.3 XM\_021847008.1  
XM\_011536542.3 XM\_021842716.1  
XM\_011536618.2 XM\_021840831.1  
XM\_011536651.3 XM\_001656959.2  
XM\_011536690.3 XM\_021850684.1  
XM\_011536720.3 XM\_021837611.1  
XM\_011536778.2 XM\_001657106.2  
XM\_011536846.2 XM\_021851952.1  
XM\_011536872.1 XM\_021846502.1  
XM\_011536886.2 XM\_021841968.1  
XM\_011536946.3 XM\_021844984.1  
XM\_011536957.1 XM\_021849647.1  
XM\_011536966.2 XM\_021839994.1  
XM\_011537009.1 XM\_021839017.1  
XM\_011537078.2 XM\_021838915.1  
XM\_011537081.2 XM\_001656655.3  
XM\_011537084.2 XM\_021851299.1  
XM\_011537179.2 XM\_001654501.3  
XM\_011537182.2 XM\_021842584.1  
XM\_011537203.3 XM\_001650374.2  
XM\_011537310.1 XR\_002499460.1  
XM\_011537332.2 XM\_001659695.2  
XM\_011537338.1 XM\_021849920.1  
XM\_011537343.1 XM\_021851263.1  
XM\_011537362.2 XM\_021854032.1  
XM\_011537397.1 XM\_001651439.2  
XM\_011537417.2 XM\_021841516.1  
XM\_011537462.2 XM\_021847121.1  
XM\_011537484.1 XM\_021853237.1  
XM\_011537504.2 XM\_021847535.1  
XM\_011537509.2 XM\_021852169.1  
XM\_011537556.2 XM\_021842187.1  
XM\_011537615.1 XM\_021846428.1  
XM\_011537616.1 XM\_001662892.2  
XM\_011537696.2 XM\_021852223.1  
XM\_011537730.3 XM\_021838264.1  
XM\_011537846.2 XM\_021841332.1  
XM\_011537912.2 XM\_021852886.1  
XM\_011537972.3 XM\_021844842.1  
XM\_011537995.2 XM\_001660079.2  
XM\_011538080.2 XM\_001658544.2  
XM\_011538184.2 XM\_021852078.1  
XM\_011538186.3 XM\_021857199.1  
XM\_011538209.2 XM\_021844679.1  
XM\_011538213.2 XM\_001650853.2  
XM\_011538361.3 XM\_021854287.1  
XM\_011538393.2 XR\_002503280.1  
XM\_011538446.3 XM\_021853234.1  
XM\_011538477.2 XM\_021841135.1  
XM\_011538525.3 XM\_021846812.1

XM\_011538598.2 XR\_002498907.1  
XM\_011538631.2 XM\_001660234.2  
XM\_011538643.3 XM\_021850336.1  
XM\_011538688.2 XM\_021847151.1  
XM\_011538692.2 XM\_021855747.1  
XM\_011538700.2 XM\_021841206.1  
XM\_011538802.1 XM\_021837793.1  
XM\_011538813.2 XM\_001660580.2  
XM\_011538828.3 XM\_021857322.1  
XM\_011538829.3 XM\_001660693.3  
XM\_011538833.2 XM\_021856990.1  
XM\_011538838.2 XM\_021841234.1  
XM\_011538844.2 XM\_021847480.1  
XM\_011538926.1 XM\_001651531.2  
XM\_011538971.2 XM\_021856338.1  
XM\_011538993.3 XM\_021838919.1  
XM\_011539000.2 XM\_021845846.1  
XM\_011539125.2 XM\_021845158.1  
XM\_011539132.2 XM\_021841240.1  
XM\_011539173.3 XR\_002501147.1  
XM\_011539199.3 XM\_021847430.1  
XM\_011539279.1 XM\_021854406.1  
XM\_011539300.2 XM\_021840598.1  
XM\_011539302.2 XM\_021839057.1  
XM\_011539308.2 XM\_021842911.1  
XM\_011539355.2 XM\_021839501.1  
XM\_011539387.2 XM\_021848495.1  
XM\_011539492.3 XM\_001654747.2  
XM\_011539537.2 XM\_001655396.2  
XM\_011539592.3 XR\_002502313.1  
XM\_011539640.1 XM\_021856280.1  
XM\_011539673.2 XM\_021843765.1  
XM\_011539744.3 XM\_021851638.1  
XM\_011539746.3 XM\_021847039.1  
XM\_011539753.2 XM\_001662050.2  
XM\_011539805.1 XM\_001649154.2  
XM\_011539826.3 XM\_021854833.1  
XM\_011539851.3 XM\_021853985.1  
XM\_011539961.2 XM\_021847460.1  
XM\_011539987.2 XM\_021840846.1  
XM\_011540104.2 XM\_021848095.1  
XM\_011540154.2 XM\_021842769.1  
XM\_011540160.2 XM\_001654622.2  
XM\_011540198.2 XM\_021851094.1  
XM\_011540207.2 XM\_001662995.2  
XM\_011540221.3 XM\_001652368.2  
XM\_011540238.2 XM\_021851590.1  
XM\_011540325.3 XM\_001656635.2  
XM\_011540327.2 XM\_021838229.1  
XM\_011540337.1 XM\_021853059.1

XM\_011540338.1 XR\_002500007.1  
XM\_011540340.3 XM\_001653516.2  
XM\_011540428.1 XM\_021855671.1  
XM\_011540466.3 XM\_021844896.1  
XM\_011540521.3 XM\_021849466.1  
XM\_011540596.2 XM\_021847711.1  
XM\_011540603.2 XM\_021853308.1  
XM\_011540606.2 XM\_021856141.1  
XM\_011540617.3 XM\_021840244.1  
XM\_011540639.3 XM\_021845915.1  
XM\_011540726.3 XM\_001660077.2  
XM\_011540730.1 XM\_001649072.2  
XM\_011540779.3 XM\_021855706.1  
XM\_011540797.2 XR\_002501336.1  
XM\_011540798.1 XM\_021843438.1  
XM\_011540903.2 XM\_021841564.1  
XM\_011540906.3 XR\_002498681.1  
XM\_011540925.2 XM\_021853969.1  
XM\_011540932.2 XM\_001648296.2  
XM\_011540945.2 XM\_001661521.2  
XM\_011540957.1 XM\_001650622.2  
XM\_011540960.1 XM\_011495053.2  
XM\_011540996.2 XM\_021856804.1  
XM\_011541011.2 XM\_021841796.1  
XM\_011541051.2 XM\_001649622.2  
XM\_011541154.2 XM\_021852261.1  
XM\_011541213.1 XR\_002499056.1  
XM\_011541285.1 XM\_021843868.1  
XM\_011541290.2 XM\_021855752.1  
XM\_011541384.2 XM\_021852706.1  
XM\_011541459.2 XR\_002501854.1  
XM\_011541498.1 XM\_001654729.2  
XM\_011541503.2 XR\_002503223.1  
XM\_011541587.3 XM\_001658000.2  
XM\_011541631.3 XM\_021846096.1  
XM\_011541691.2 XM\_021840978.1  
XM\_011541708.3 XM\_021843950.1  
XM\_011541739.2 XM\_021848599.1  
XM\_011541763.1 XM\_021842742.1  
XM\_011541766.2 XM\_021855123.1  
XM\_011541768.1 XM\_021842183.1  
XM\_011541872.3 XM\_001647755.2  
XM\_011541962.2 XR\_002500968.1  
XM\_011541963.2 XM\_001657520.2  
XM\_011541971.2 XM\_001663696.2  
XM\_011541974.2 XM\_021839479.1  
XM\_011542035.3 XM\_021848098.1  
XM\_011542063.2 XM\_021846813.1  
XM\_011542072.1 XM\_021838918.1  
XM\_011542077.2 XM\_021846598.1

XM\_011542212.2 XM\_011494908.2  
XM\_011542265.3 XM\_021841241.1  
XM\_011542351.1 XR\_002500663.1  
XM\_011542383.2 XM\_021837244.1  
XM\_011542399.2 XM\_001652695.2  
XM\_011542522.2 XM\_021854003.1  
XM\_011542567.2 XM\_021846416.1  
XM\_011542632.3 XM\_021846974.1  
XM\_011542633.2 XM\_021857457.1  
XM\_011542648.2 XM\_021837964.1  
XM\_011542739.2 XM\_021846098.1  
XM\_011542740.2 XM\_021853434.1  
XM\_011542790.3 XM\_021840597.1  
XM\_011542792.1 XM\_001648951.2  
XM\_011542857.2 XM\_021849129.1  
XM\_011542870.2 XM\_021840017.1  
XM\_011542901.2 XM\_021840878.1  
XM\_011542903.3 XR\_002501937.1  
XM\_011542907.1 XM\_021840055.1  
XM\_011542917.2 XM\_021837801.1  
XM\_011543000.2 XM\_021854094.1  
XM\_011543048.1 XM\_021849128.1  
XM\_011543055.2 XM\_001657472.2  
XM\_011543086.2 XM\_021840704.1  
XM\_011543131.3 XM\_001656392.2  
XM\_011543143.2 XM\_001653346.2  
XM\_011543150.1 XM\_001658122.2  
XM\_011543167.3 XM\_021844597.1  
XM\_011543232.2 XM\_021847971.1  
XM\_011543255.3 XM\_021850345.1  
XM\_011543308.3 XM\_021854684.1  
XM\_011543334.2 XM\_021854005.1  
XM\_011543340.2 XM\_001648603.2  
XM\_011543349.3 XM\_021846921.1  
XM\_011543366.2 XM\_001654598.2  
XM\_011543385.3 XM\_021842134.1  
XM\_011543531.3 XM\_021842535.1  
XM\_011543533.2 XM\_021837246.1  
XM\_011543538.2 XM\_001654722.2  
XM\_011543559.2 XR\_002500941.1  
XM\_011543570.2 XM\_021842570.1  
XM\_011543574.3 XM\_021840712.1  
XM\_011543586.2 XM\_021852271.1  
XM\_011543607.2 XM\_021837795.1  
XM\_011543608.2 XM\_021848341.1  
XM\_011543609.2 XM\_021839971.1  
XM\_011543643.2 XM\_021855793.1  
XM\_011543680.2 XM\_021856841.1  
XM\_011543735.3 XM\_021851095.1  
XM\_011543758.2 XM\_021842326.1

XM\_011543766.1 XM\_001662634.2  
XM\_011543786.2 XM\_021840913.1  
XM\_011543811.2 XM\_021853314.1  
XM\_011543821.2 XM\_021838705.1  
XM\_011543830.3 XM\_021848745.1  
XM\_011543843.3 XM\_021841660.1  
XM\_011543885.2 XR\_002498600.1  
XM\_011544035.2 XM\_021855378.1  
XM\_011544048.2 XR\_002502832.1  
XM\_011544063.2 XM\_001658074.2  
XM\_011544076.1 XR\_002501465.1  
XM\_011544087.2 XM\_021837548.1  
XM\_011544108.3 XM\_001658587.2  
XM\_011544132.2 XM\_021847688.1  
XM\_011544161.3 XR\_002500474.1  
XM\_011544164.2 XM\_001649070.2  
XM\_011544169.2 XM\_021850695.1  
XM\_011544206.3 XM\_021839421.1  
XM\_011544220.2 XM\_021839958.1  
XM\_011544227.1 XM\_021842246.1  
XM\_011544305.2 XM\_001650752.3  
XM\_011544342.3 XM\_021848890.1  
XM\_011544360.2 XM\_021851583.1  
XM\_011544364.3 XM\_021852950.1  
XM\_011544368.3 XM\_021847228.1  
XM\_011544426.2 XM\_021848017.1  
XM\_011544456.2 XM\_021838799.1  
XM\_011544481.2 XM\_021853212.1  
XM\_011544482.2 XM\_001662843.2  
XM\_011544505.2 XM\_001656295.2  
XM\_011544518.2 XM\_021856815.1  
XM\_011544526.2 XM\_001653506.2  
XM\_011544550.2 XM\_021854234.1  
XM\_011544569.1 XM\_001656152.2  
XM\_011544632.2 XM\_021838907.1  
XM\_011544679.3 XM\_021841248.1  
XM\_011544680.3 XM\_021855306.1  
XM\_011544687.1 XM\_001659505.2  
XM\_011544713.2 XM\_021855051.1  
XM\_011544860.3 XM\_021849807.1  
XM\_011544861.1 XM\_021843365.1  
XM\_011544884.2 XM\_021846250.1  
XM\_011544888.2 XM\_001648626.2  
XM\_011544899.1 XM\_021840735.1  
XM\_011544933.3 XM\_021843362.1  
XM\_011544955.3 XM\_021853229.1  
XM\_011545002.2 XM\_021843360.1  
XM\_011545044.2 XR\_002502729.1  
XM\_011545063.3 XM\_001655267.2  
XM\_011545073.1 XM\_021847983.1

XM\_011545110.1 XM\_021843529.1  
XM\_011545165.3 XM\_001653570.2  
XM\_011545240.2 XM\_021837798.1  
XM\_011545293.2 XM\_021842684.1  
XM\_011545308.3 XM\_021847776.1  
XM\_011545403.2 XM\_021841004.1  
XM\_011545468.2 XM\_021857118.1  
XM\_011545472.3 XM\_021843148.1  
XM\_011545478.2 XM\_001649954.2  
XM\_011545564.3 XM\_021838909.1  
XM\_011545585.2 XM\_021838797.1  
XM\_011545711.2 XM\_001652872.3  
XM\_011545713.1 XM\_001657198.2  
XM\_011545738.1 XM\_021838182.1  
XM\_011545764.1 XM\_021854151.1  
XM\_011545770.1 XM\_021843229.1  
XM\_011545784.3 XM\_021842245.1  
XM\_011545824.3 XM\_001660773.2  
XM\_011545836.3 XM\_021838262.1  
XM\_011545913.2 XM\_001655992.2  
XM\_011546001.3 XM\_021848083.1  
XM\_011546149.2 XR\_002502077.1  
XM\_011546186.1 XM\_021855523.1  
XM\_011547058.2 XM\_021847784.1  
XM\_011547362.3 XM\_021853872.1  
XM\_017000046.1 XM\_021850239.1  
XM\_017000054.1 XM\_021841535.1  
XM\_017000095.2 XM\_021850066.1  
XM\_017000148.2 XM\_021846722.1  
XM\_017000212.2 XM\_021849064.1  
XM\_017000215.2 XM\_021845450.1  
XM\_017000216.1 XM\_021853674.1  
XM\_017000236.2 XM\_021837906.1  
XM\_017000256.2 XM\_001663439.2  
XM\_017000272.1 XM\_001658937.2  
XM\_017000284.1 XM\_021850825.1  
XM\_017000307.1 XM\_021838224.1  
XM\_017000339.1 XM\_021838868.1  
XM\_017000395.1 XM\_021845708.1  
XM\_017000451.1 XM\_021848508.1  
XM\_017000466.1 XM\_021847469.1  
XM\_017000495.1 XM\_021837915.1  
XM\_017000509.2 XM\_021846377.1  
XM\_017000544.2 XM\_021846321.1  
XM\_017000597.1 XM\_001649468.2  
XM\_017000622.1 XM\_021852721.1  
XM\_017000623.2 XM\_021848199.1  
XM\_017000624.2 XM\_021841003.1  
XM\_017000665.1 XM\_021850069.1  
XM\_017000691.1 XR\_002498777.1

XM\_017000712.1 XM\_021843363.1  
XM\_017000717.1 XM\_021848601.1  
XM\_017000758.1 XM\_021845748.1  
XM\_017000769.2 XM\_001654074.2  
XM\_017000777.1 XM\_021852511.1  
XM\_017000781.1 XM\_001657405.2  
XM\_017000805.2 XM\_021841243.1  
XM\_017000836.1 XM\_021839411.1  
XM\_017000954.2 XM\_001657568.2  
XM\_017000976.1 XM\_001651296.3  
XM\_017000977.1 XM\_021857609.1  
XM\_017000994.2 XM\_001648911.2  
XM\_017001000.2 XM\_021851576.1  
XM\_017001044.1 XR\_002499818.1  
XM\_017001047.1 XM\_021850347.1  
XM\_017001051.1 XM\_021855052.1  
XM\_017001053.1 XM\_021851155.1  
XM\_017001061.2 XM\_001653437.2  
XM\_017001074.1 XM\_021852319.1  
XM\_017001087.2 XM\_021850889.1  
XM\_017001192.2 XM\_001662418.2  
XM\_017001206.1 XM\_001662326.2  
XM\_017001238.1 XM\_021843224.1  
XM\_017001245.2 XM\_001651234.2  
XM\_017001254.1 XM\_001661956.2  
XM\_017001294.1 XM\_001663878.2  
XM\_017001306.2 XM\_021853027.1  
XM\_017001307.2 XM\_021841829.1  
XM\_017001317.1 XM\_021848129.1  
XM\_017001333.1 XM\_021855661.1  
XM\_017001383.1 XM\_001660960.2  
XM\_017001392.2 XM\_001662295.2  
XM\_017001407.1 XM\_021853453.1  
XM\_017001428.1 XM\_021851494.1  
XM\_017001514.1 XM\_021849811.1  
XM\_017001527.1 XM\_021854947.1  
XM\_017001534.1 XM\_021840923.1  
XM\_017001541.2 XM\_021839237.1  
XM\_017001567.1 XM\_021849613.1  
XM\_017001618.1 XM\_021855927.1  
XM\_017001626.1 XM\_021840722.1  
XM\_017001630.1 XM\_021842722.1  
XM\_017001690.1 XM\_001655238.2  
XM\_017001694.1 XM\_021850234.1  
XM\_017001705.1 XM\_021842714.1  
XM\_017001751.1 XM\_021850542.1  
XM\_017001788.1 XM\_001654404.2  
XM\_017001869.1 XM\_021842495.1  
XM\_017001905.1 XM\_001655387.2  
XM\_017001939.1 XM\_001654754.2



XM\_017002089.2 XM\_021849413.1  
XM\_017002094.2 XM\_021838287.1  
XM\_017002098.2 XM\_021837239.1  
XM\_017002099.2 XM\_021847417.1  
XM\_017002177.1 XM\_001661489.2  
XM\_017002185.1 XM\_021857128.1  
XM\_017002241.1 XM\_021846307.1  
XM\_017002252.2 XM\_001651159.2  
XM\_017002260.2 XR\_002502909.1  
XM\_017002264.2 XM\_021844576.1  
XM\_017002302.1 XM\_001655469.2  
XM\_017002479.1 XM\_021842789.1  
XM\_017002550.2 XM\_021842779.1  
XM\_017002685.2 XM\_021852269.1  
XM\_017002767.1 XM\_001648651.2  
XM\_017002774.1 XM\_021839392.1  
XM\_017002785.2 XM\_021840738.1  
XM\_017002928.2 XM\_021848862.1  
XM\_017002929.1 XR\_002500881.1  
XM\_017002933.2 XM\_021840710.1  
XM\_017002946.2 XM\_021847137.1  
XM\_017002955.1 XM\_021849949.1  
XM\_017002997.1 XM\_021839924.1  
XM\_017003042.2 XM\_021847856.1  
XM\_017003093.1 XM\_001650002.2  
XM\_017003105.2 XM\_001656181.2  
XM\_017003113.1 XM\_021837991.1  
XM\_017003116.1 XM\_021845386.1  
XM\_017003159.2 XM\_001657485.2  
XM\_017003196.2 XM\_021838956.1  
XM\_017003220.1 XM\_001658400.2  
XM\_017003264.2 XR\_002499551.1  
XM\_017003297.1 XM\_021846082.1  
XM\_017003309.1 XM\_001655489.2  
XM\_017003314.2 XM\_021843219.1  
XM\_017003365.1 XM\_001651123.2  
XM\_017003382.2 XM\_021854811.1  
XM\_017003396.1 XR\_002499097.1  
XM\_017003399.2 XM\_021847413.1  
XM\_017003402.1 XM\_021839048.1  
XM\_017003410.1 XM\_001654484.2  
XM\_017003426.2 XM\_001647518.2  
XM\_017003432.2 XM\_001650865.2  
XM\_017003447.1 XM\_021838792.1  
XM\_017003455.2 XM\_021851207.1  
XM\_017003475.2 XM\_021839134.1  
XM\_017003479.1 XM\_001663856.2  
XM\_017003480.2 XM\_021853339.1  
XM\_017003488.2 XM\_021839138.1  
XM\_017003503.1 XM\_021837797.1

XM\_017003526.1 XM\_021842947.1  
XM\_017003527.1 XM\_001652474.2  
XM\_017003528.1 XM\_021856418.1  
XM\_017003548.1 XM\_021856740.1  
XM\_017003549.2 XM\_021852914.1  
XM\_017003576.1 XM\_001661737.2  
XM\_017003604.1 XM\_021854770.1  
XM\_017003606.1 XM\_021854932.1  
XM\_017003622.1 XM\_001650152.2  
XM\_017003659.1 XM\_021842499.1  
XM\_017003664.1 XM\_021850002.1  
XM\_017003667.1 XM\_021838112.1  
XM\_017003670.1 XM\_021846452.1  
XM\_017003683.2 XM\_021856768.1  
XM\_017003700.1 XM\_001654510.2  
XM\_017003716.1 XM\_021856844.1  
XM\_017003722.1 XM\_021841096.1  
XM\_017003771.1 XM\_021855842.1  
XM\_017003818.1 XM\_021855050.1  
XM\_017003833.2 XM\_021855841.1  
XM\_017003834.1 XM\_021847621.1  
XM\_017003838.1 XM\_001648453.2  
XM\_017003890.1 XM\_001649489.2  
XM\_017003897.1 XM\_001661230.2  
XM\_017003925.1 XM\_021852388.1  
XM\_017003930.1 XR\_002501038.1  
XM\_017003996.1 XM\_021856926.1  
XM\_017004007.1 XM\_021837978.1  
XM\_017004009.1 XM\_021848023.1  
XM\_017004034.1 XM\_021857351.1  
XM\_017004062.1 XM\_001664202.2  
XM\_017004082.2 XM\_021847895.1  
XM\_017004086.2 XM\_021846256.1  
XM\_017004174.1 XR\_002501860.1  
XM\_017004236.1 XM\_021848411.1  
XM\_017004276.1 XR\_002501252.1  
XM\_017004312.2 XR\_002498742.1  
XM\_017004343.2 XM\_001655843.2  
XM\_017004366.1 XM\_021838478.1  
XM\_017004379.2 XM\_021839335.1  
XM\_017004401.2 XM\_021843395.1  
XM\_017004403.1 XM\_021850235.1  
XM\_017004432.2 XM\_021856677.1  
XM\_017004447.1 XM\_021849533.1  
XM\_017004492.2 XM\_001657766.2  
XM\_017004514.2 XM\_021844296.1  
XM\_017004557.1 XM\_021844944.1  
XM\_017004575.2 XM\_001663566.2  
XM\_017004624.2 XM\_021847896.1  
XM\_017004656.1 XM\_021846255.1

XM\_017004664.1 XM\_021848682.1  
XM\_017004669.1 XM\_021852357.1  
XM\_017004701.1 XR\_002499156.1  
XM\_017004738.1 XM\_021842417.1  
XM\_017004824.1 XM\_021855857.1  
XM\_017004866.1 XM\_021852132.1  
XM\_017004891.1 XM\_021839398.1  
XM\_017004920.2 XM\_021857004.1  
XM\_017004956.2 XR\_002501861.1  
XM\_017004979.2 XM\_021853021.1  
XM\_017004999.1 XM\_001654238.2  
XM\_017005076.2 XM\_021842027.1  
XM\_017005088.1 XM\_021851534.1  
XM\_017005092.2 XM\_021846251.1  
XM\_017005146.1 XM\_021847035.1  
XM\_017005160.2 XM\_021847255.1  
XM\_017005187.2 XM\_021839962.1  
XM\_017005219.2 XM\_001655268.2  
XM\_017005235.1 XM\_001651748.2  
XM\_017005385.1 XM\_001659059.2  
XM\_017005469.2 XM\_021857269.1  
XM\_017005476.1 XM\_001659938.2  
XM\_017005522.1 XR\_002501972.1  
XM\_017005653.1 XM\_021847231.1  
XM\_017005690.1 XM\_001655713.2  
XM\_017005694.2 XM\_001650175.2  
XM\_017005699.1 XM\_021847897.1  
XM\_017005702.1 XM\_021839928.1  
XM\_017005731.1 XM\_021856375.1  
XM\_017005744.2 XM\_021843142.1  
XM\_017005756.1 XM\_021842668.1  
XM\_017005762.2 XM\_001661814.2  
XM\_017005766.2 XM\_021855064.1  
XM\_017005785.1 XM\_001652195.2  
XM\_017005796.1 XM\_021842092.1  
XM\_017005811.2 XM\_021850142.1  
XM\_017005813.1 XM\_021843411.1  
XM\_017005823.2 XM\_021838800.1  
XM\_017005861.1 XR\_002502309.1  
XM\_017005894.1 XM\_021847464.1  
XM\_017005907.2 XM\_021838080.1  
XM\_017005927.1 XM\_021851864.1  
XM\_017005946.2 XM\_001654117.2  
XM\_017005993.1 XM\_021838894.1  
XM\_017006035.1 XM\_021847342.1  
XM\_017006041.2 XM\_021855193.1  
XM\_017006048.1 XM\_001659233.2  
XM\_017006071.2 XM\_001650571.2  
XM\_017006080.2 XM\_021853431.1  
XM\_017006083.2 XM\_021849371.1

XM\_017006091.1 XM\_021857339.1  
XM\_017006103.1 XM\_001656795.2  
XM\_017006122.1 XM\_001661715.3  
XM\_017006123.1 XM\_021840458.1  
XM\_017006139.1 XM\_021850547.1  
XM\_017006144.1 XR\_002500716.1  
XM\_017006147.1 XM\_001650577.2  
XM\_017006157.1 XM\_021840854.1  
XM\_017006172.2 XM\_021852082.1  
XM\_017006199.1 XM\_021841352.1  
XM\_017006205.1 XM\_021851730.1  
XM\_017006218.1 XM\_021853673.1  
XM\_017006257.1 XM\_021855828.1  
XM\_017006285.1 XM\_021840985.1  
XM\_017006299.1 XM\_001652537.2  
XM\_017006368.1 XR\_002502105.1  
XM\_017006386.1 XM\_021847857.1  
XM\_017006484.2 XM\_001659332.2  
XM\_017006520.1 XM\_021846953.1  
XM\_017006612.2 XM\_001664043.2  
XM\_017006624.1 XM\_021848010.1  
XM\_017006629.1 XM\_021842657.1  
XM\_017006632.1 XM\_021838884.1  
XM\_017006645.2 XM\_021837305.1  
XM\_017006709.1 XM\_001657157.2  
XM\_017006724.1 XM\_021845454.1  
XM\_017006746.2 XM\_021851981.1  
XM\_017006759.2 XM\_001659374.2  
XM\_017006776.1 XM\_021855859.1  
XM\_017006782.1 XM\_001659267.2  
XM\_017006787.2 XM\_021853491.1  
XM\_017006797.2 XM\_021856309.1  
XM\_017006818.2 XM\_001656627.2  
XM\_017006825.2 XM\_021852987.1  
XM\_017006827.2 XM\_021855295.1  
XM\_017006878.2 XM\_021850025.1  
XM\_017006929.2 XM\_021847894.1  
XM\_017006932.2 XM\_021849279.1  
XM\_017006951.2 XM\_021840984.1  
XM\_017006963.2 XM\_021847775.1  
XM\_017006982.1 XM\_021845455.1  
XM\_017007015.1 XM\_001661096.2  
XM\_017007017.1 XM\_021855061.1  
XM\_017007062.1 XM\_021848856.1  
XM\_017007141.1 XR\_002501475.1  
XM\_017007158.2 XM\_021854768.1  
XM\_017007161.2 XM\_001652785.2  
XM\_017007201.1 XM\_021846577.1  
XM\_017007208.1 XM\_021855141.1  
XM\_017007300.1 XM\_021840800.1

XM\_017007347.1 XM\_001651839.2  
XM\_017007375.1 XM\_021844678.1  
XM\_017007379.2 XM\_021841468.1  
XM\_017007436.1 XM\_021838479.1  
XM\_017007444.1 XM\_021844905.1  
XM\_017007523.2 XM\_021849275.1  
XM\_017007526.2 XM\_001659177.2  
XM\_017007534.1 XM\_021851285.1  
XM\_017007552.2 XR\_002502218.1  
XM\_017007571.1 XM\_021837658.1  
XM\_017007589.1 XM\_021855843.1  
XM\_017007639.2 XM\_021844396.1  
XM\_017007648.2 XM\_021849929.1  
XM\_017007709.2 XM\_021854969.1  
XM\_017007720.1 XR\_002500255.1  
XM\_017007722.1 XM\_021853752.1  
XM\_017007741.2 XM\_021856562.1  
XM\_017007798.1 XM\_021855662.1  
XM\_017007799.1 XM\_001649030.2  
XM\_017007805.2 XM\_021850767.1  
XM\_017007809.1 XM\_021848982.1  
XM\_017007892.2 XM\_021851633.1  
XM\_017007903.1 XM\_001658168.2  
XM\_017007911.1 XM\_001664160.2  
XM\_017007913.2 XM\_021854277.1  
XM\_017007938.1 XM\_001660480.2  
XM\_017007944.1 XM\_021850513.1  
XM\_017007958.1 XM\_001661427.2  
XM\_017007985.1 XM\_021842078.1  
XM\_017007994.1 XM\_021851760.1  
XM\_017008009.1 XM\_021838698.1  
XM\_017008016.2 XM\_021840497.1  
XM\_017008030.2 XM\_011494732.2  
XM\_017008130.1 XM\_021850826.1  
XM\_017008152.2 XM\_021847246.1  
XM\_017008189.1 XM\_021849383.1  
XM\_017008199.1 XM\_001651722.2  
XM\_017008210.2 XM\_021842093.1  
XM\_017008224.1 XM\_021849683.1  
XM\_017008295.2 XR\_002500720.1  
XM\_017008319.1 XM\_021845795.1  
XM\_017008341.1 XM\_021847770.1  
XM\_017008353.1 XR\_002500041.1  
XM\_017008371.1 XM\_021842903.1  
XM\_017008402.1 XM\_021849823.1  
XM\_017008474.1 XM\_021842847.1  
XM\_017008491.1 XM\_021839054.1  
XM\_017008508.1 XM\_021848172.1  
XM\_017008511.2 XM\_021853960.1  
XM\_017008514.2 XM\_021839476.1

XM\_017008515.2 XM\_001660235.2  
XM\_017008544.2 XM\_001659211.2  
XM\_017008563.1 XM\_001663685.2  
XM\_017008568.1 XM\_001653766.2  
XM\_017008587.1 XM\_021856304.1  
XM\_017008593.2 XM\_021851421.1  
XM\_017008594.2 XM\_021843953.1  
XM\_017008612.2 XM\_021846278.1  
XM\_017008630.1 XM\_021854779.1  
XM\_017008699.1 XM\_001654945.2  
XM\_017008717.2 XM\_021854904.1  
XM\_017008735.1 XM\_021840807.1  
XM\_017008736.1 XM\_021852767.1  
XM\_017008737.1 XM\_021841689.1  
XM\_017008773.2 XM\_021847921.1  
XM\_017008820.2 XM\_021852996.1  
XM\_017008834.1 XM\_021849948.1  
XM\_017008864.2 XM\_021856646.1  
XM\_017008884.1 XM\_021838492.1  
XM\_017008888.1 XM\_021848378.1  
XM\_017008929.2 XM\_021852652.1  
XM\_017008947.2 XM\_001649964.2  
XM\_017008980.2 XM\_021855827.1  
XM\_017008984.2 XM\_001658236.2  
XM\_017008985.2 XM\_001655297.2  
XM\_017009007.1 XM\_021851896.1  
XM\_017009014.1 XM\_021854302.1  
XM\_017009019.2 XM\_021848167.1  
XM\_017009037.2 XR\_002500488.1  
XM\_017009043.2 XM\_021840709.1  
XM\_017009085.1 XM\_021842574.1  
XM\_017009097.2 XM\_021842681.1  
XM\_017009112.2 XM\_001658956.2  
XM\_017009126.2 XM\_021857164.1  
XM\_017009134.1 XM\_021854225.1  
XM\_017009149.2 XR\_002499184.1  
XM\_017009161.2 XM\_021849372.1  
XM\_017009168.1 XR\_002500049.1  
XM\_017009172.1 XM\_021844845.1  
XM\_017009186.1 XM\_021841390.1  
XM\_017009204.1 XM\_021837971.1  
XM\_017009241.2 XM\_021847691.1  
XM\_017009250.2 XM\_021842442.1  
XM\_017009263.1 XM\_021840705.1  
XM\_017009265.1 XR\_002499259.1  
XM\_017009293.2 XM\_001651712.2  
XM\_017009315.2 XM\_001649882.3  
XM\_017009322.2 XM\_021841491.1  
XM\_017009363.1 XM\_021848473.1  
XM\_017009439.2 XM\_001658581.2

XM\_017009449.1 XM\_021846272.1  
XM\_017009460.1 XM\_001655335.2  
XM\_017009469.1 XM\_021845237.1  
XM\_017009470.2 XM\_021846808.1  
XM\_017009473.1 XM\_021857356.1  
XM\_017009491.1 XM\_021857473.1  
XM\_017009497.2 XM\_001651052.2  
XM\_017009544.2 XM\_021849209.1  
XM\_017009621.2 XM\_021848293.1  
XM\_017009630.1 XM\_021847685.1  
XM\_017009657.1 XM\_001659810.2  
XM\_017009664.1 XM\_021847854.1  
XM\_017009725.2 XM\_001661276.2  
XM\_017009740.1 XM\_021847576.1  
XM\_017009766.1 XM\_001652555.2  
XM\_017009792.2 XM\_021842318.1  
XM\_017009814.1 XM\_021854278.1  
XM\_017009858.2 XR\_002502574.1  
XM\_017009869.1 XM\_021838319.1  
XM\_017009872.1 XM\_021853613.1  
XM\_017009886.2 XM\_021841504.1  
XM\_017010000.1 XM\_021838699.1  
XM\_017010009.1 XM\_021849127.1  
XM\_017010061.1 XR\_002499640.1  
XM\_017010072.2 XM\_021856644.1  
XM\_017010087.2 XM\_021845336.1  
XM\_017010099.2 XM\_021846279.1  
XM\_017010115.2 XM\_001657083.2  
XM\_017010164.2 XM\_021841812.1  
XM\_017010199.2 XM\_001663329.2  
XM\_017010202.1 XR\_002501786.1  
XM\_017010205.2 XR\_002499253.1  
XM\_017010217.2 XM\_021848919.1  
XM\_017010278.2 XM\_021857476.1  
XM\_017010300.2 XM\_021849675.1  
XM\_017010339.1 XR\_002499533.1  
XM\_017010374.2 XM\_021853665.1  
XM\_017010409.1 XM\_001660854.2  
XM\_017010440.2 XR\_002499260.1  
XM\_017010441.2 XM\_021843842.1  
XM\_017010472.1 XR\_002499543.1  
XM\_017010588.1 XM\_021848360.1  
XM\_017010598.2 XM\_021855053.1  
XM\_017010629.2 XM\_021850462.1  
XM\_017010632.2 XM\_001649426.2  
XM\_017010636.2 XM\_001650588.2  
XM\_017010663.2 XM\_021855890.1  
XM\_017010712.1 XR\_002499441.1  
XM\_017010714.2 XM\_021843380.1  
XM\_017010721.1 XM\_021842846.1

XM\_017010736.2 XR\_002502360.1  
XM\_017010744.2 XM\_021845120.1  
XM\_017010752.1 XM\_001653113.2  
XM\_017010809.2 XM\_001662276.2  
XM\_017010812.1 XM\_021840983.1  
XM\_017010830.1 XM\_021840464.1  
XM\_017010882.1 XM\_021837839.1  
XM\_017010912.2 XM\_021841065.1  
XM\_017010929.2 XM\_001656182.2  
XM\_017010949.2 XM\_021837842.1  
XM\_017010985.1 XM\_021849175.1  
XM\_017011000.1 XM\_001659936.2  
XM\_017011001.1 XM\_021839929.1  
XM\_017011046.1 XM\_021839238.1  
XM\_017011050.1 XM\_021853666.1  
XM\_017011052.1 XM\_021857660.1  
XM\_017011054.1 XM\_021848474.1  
XM\_017011105.2 XM\_021857454.1  
XM\_017011139.2 XM\_021857684.1  
XM\_017011174.2 XM\_021855054.1  
XM\_017011227.1 XM\_021855926.1  
XM\_017011235.2 XM\_021846324.1  
XM\_017011243.2 XM\_021851959.1  
XM\_017011248.2 XM\_021841176.1  
XM\_017011278.2 XM\_021850149.1  
XM\_017011305.2 XM\_021855060.1  
XM\_017011321.1 XM\_001661331.2  
XM\_017011348.1 XM\_021841759.1  
XM\_017011403.1 XM\_021840364.1  
XM\_017011426.2 XM\_021855140.1  
XM\_017011448.2 XM\_001654688.2  
XM\_017011450.2 XM\_021852270.1  
XM\_017011462.1 XM\_001662653.2  
XM\_017011466.2 XM\_021837834.1  
XM\_017011503.1 XM\_021841580.1  
XM\_017011560.2 XM\_021843780.1  
XM\_017011562.2 XM\_021840821.1  
XM\_017011662.2 XM\_021841534.1  
XM\_017011722.1 XM\_021837539.1  
XM\_017011739.1 XM\_001655554.2  
XM\_017011757.1 XR\_002502907.1  
XM\_017011761.2 XM\_021853425.1  
XM\_017011795.1 XM\_021840319.1  
XM\_017011813.1 XM\_021838493.1  
XM\_017011864.1 XM\_021848921.1  
XM\_017011874.1 XM\_001657407.2  
XM\_017011888.1 XM\_021839338.1  
XM\_017011905.2 XM\_021844675.1  
XM\_017011929.2 XM\_021846160.1  
XM\_017011937.1 XR\_002501447.1



XM\_017011972.1 XM\_021846796.1  
XM\_017011974.1 XM\_021853353.1  
XM\_017012006.2 XM\_021847613.1  
XM\_017012016.2 XM\_001658119.2  
XM\_017012038.2 XR\_002503217.1  
XM\_017012040.2 XM\_021854967.1  
XM\_017012060.2 XM\_021850456.1  
XM\_017012076.1 XM\_021840304.1  
XM\_017012080.1 XM\_001658746.2  
XM\_017012114.1 XM\_021837450.1  
XM\_017012136.2 XR\_002502075.1  
XM\_017012182.1 XM\_001652304.2  
XM\_017012226.1 XM\_021842217.1  
XM\_017012227.1 XM\_021842332.1  
XM\_017012230.1 XR\_002500408.1  
XM\_017012294.1 XM\_021855102.1  
XM\_017012298.2 XM\_001648484.2  
XM\_017012335.2 XM\_021849260.1  
XM\_017012388.1 XM\_021857358.1  
XM\_017012452.1 XM\_021845589.1  
XM\_017012492.2 XM\_021852536.1  
XM\_017012506.2 XM\_001655132.2  
XM\_017012540.1 XM\_021847855.1  
XM\_017012616.2 XM\_001656766.2  
XM\_017012659.1 XM\_001662583.2  
XM\_017012738.1 XR\_002502146.1  
XM\_017012746.1 XM\_021843347.1  
XM\_017012750.2 XM\_001654267.2  
XM\_017012760.2 XM\_001648588.3  
XM\_017012802.1 XM\_021838630.1  
XM\_017012820.1 XM\_001661368.2  
XM\_017012845.2 XR\_002502380.1  
XM\_017012878.2 XM\_001655326.2  
XM\_017012938.1 XM\_021844603.1  
XM\_017012944.1 XM\_021851154.1  
XM\_017012959.1 XR\_002500655.1  
XM\_017012994.2 XM\_001659696.2  
XM\_017012998.2 XM\_021853161.1  
XM\_017013021.2 XM\_021838837.1  
XM\_017013048.1 XM\_021852074.1  
XM\_017013171.1 XM\_021846995.1  
XM\_017013263.1 XM\_021847277.1  
XM\_017013268.2 XM\_021841269.1  
XM\_017013289.1 XM\_021857002.1  
XM\_017013306.1 XM\_001652431.3  
XM\_017013310.2 XM\_001653853.2  
XM\_017013323.1 XM\_021849907.1  
XM\_017013373.1 XM\_021849132.1  
XM\_017013376.2 XR\_002498740.1  
XM\_017013415.2 XM\_021837961.1

XM\_017013416.1 XM\_021850135.1  
XM\_017013428.2 XM\_021850349.1  
XM\_017013467.2 XM\_021854344.1  
XM\_017013516.1 XM\_021847006.1  
XM\_017013535.1 XM\_021856630.1  
XM\_017013567.2 XM\_021843745.1  
XM\_017013576.1 XM\_021854080.1  
XM\_017013604.2 XM\_001658131.2  
XM\_017013645.1 XM\_021844589.1  
XM\_017013656.2 XM\_021845351.1  
XM\_017013693.1 XM\_021852492.1  
XM\_017013705.2 XR\_002502518.1  
XM\_017013755.1 XM\_021846842.1  
XM\_017013780.1 XM\_021855499.1  
XM\_017013824.2 XM\_021854079.1  
XM\_017013856.2 XM\_021847113.1  
XM\_017013905.1 XM\_021856133.1  
XM\_017013934.1 XM\_021843531.1  
XM\_017013942.1 XM\_021852816.1  
XM\_017013979.2 XM\_001657762.2  
XM\_017013984.1 XM\_021841581.1  
XM\_017013995.2 XM\_021852997.1  
XM\_017014001.2 XM\_021838809.1  
XM\_017014028.2 XM\_021837364.1  
XM\_017014091.1 XM\_021857388.1  
XM\_017014117.2 XM\_001651905.2  
XM\_017014171.1 XM\_021838980.1  
XM\_017014182.1 XM\_021843539.1  
XM\_017014194.1 XR\_002502393.1  
XM\_017014222.1 XM\_021849133.1  
XM\_017014237.2 XM\_021845951.1  
XM\_017014244.2 XM\_021856026.1  
XM\_017014268.1 XM\_021846423.1  
XM\_017014269.2 XM\_021844886.1  
XM\_017014279.1 XM\_021839286.1  
XM\_017014300.1 XM\_021851208.1  
XM\_017014340.1 XM\_021856868.1  
XM\_017014428.1 XM\_021837616.1  
XM\_017014447.1 XM\_001650388.2  
XM\_017014501.2 XM\_021838652.1  
XM\_017014508.1 XR\_002499829.1  
XM\_017014517.2 XM\_021853924.1  
XM\_017014548.2 XR\_002502368.1  
XM\_017014557.1 XM\_021856620.1  
XM\_017014568.1 XM\_021839933.1  
XM\_017014571.1 XR\_002503208.1  
XM\_017014586.1 XM\_001650147.2  
XM\_017014588.1 XM\_001651459.2  
XM\_017014594.2 XM\_021853003.1  
XM\_017014597.2 XM\_001650268.2

XM\_017014666.2 XM\_021847924.1  
XM\_017014671.1 XM\_021852538.1  
XM\_017014720.1 XM\_001662585.2  
XM\_017014753.2 XM\_021839240.1  
XM\_017014792.1 XM\_021848475.1  
XM\_017014803.1 XM\_021841075.1  
XM\_017014804.1 XM\_021841853.1  
XM\_017014943.2 XM\_021840533.1  
XM\_017014951.2 XM\_001657073.2  
XM\_017014969.2 XM\_001661150.2  
XM\_017015139.2 XM\_021853344.1  
XM\_017015213.1 XM\_001657231.2  
XM\_017015225.1 XM\_001650445.2  
XM\_017015227.1 XM\_021844606.1  
XM\_017015240.2 XM\_021842333.1  
XM\_017015241.2 XM\_021851446.1  
XM\_017015253.1 XM\_001660052.2  
XM\_017015312.2 XM\_021843377.1  
XM\_017015316.1 XM\_021853594.1  
XM\_017015355.2 XM\_021841683.1  
XM\_017015360.2 XM\_021844590.1  
XM\_017015380.1 XM\_021840826.1  
XM\_017015419.1 XM\_021839053.1  
XM\_017015453.1 XM\_021846195.1  
XM\_017015454.1 XM\_021837807.1  
XM\_017015512.1 XM\_021849024.1  
XM\_017015540.1 XM\_021847227.1  
XM\_017015572.1 XM\_021849684.1  
XM\_017015574.2 XM\_021845733.1  
XM\_017015584.2 XR\_002500734.1  
XM\_017015604.1 XM\_021849131.1  
XM\_017015617.1 XR\_002501333.1  
XM\_017015623.1 XM\_021848996.1  
XM\_017015630.1 XR\_002498841.1  
XM\_017015674.1 XM\_001658212.2  
XM\_017015687.2 XM\_021845058.1  
XM\_017015703.2 XM\_021838411.1  
XM\_017015712.1 XM\_001660552.3  
XM\_017015740.2 XM\_001649559.2  
XM\_017015831.2 XM\_021837228.1  
XM\_017015849.1 XM\_021847321.1  
XM\_017015855.1 XM\_021847103.1  
XM\_017015878.1 XM\_021845958.1  
XM\_017015928.1 XR\_002499104.1  
XM\_017015982.1 XM\_021841204.1  
XM\_017016042.1 XM\_021848964.1  
XM\_017016073.1 XM\_001662419.2  
XM\_017016100.1 XM\_021840360.1  
XM\_017016130.1 XM\_021851616.1  
XM\_017016164.1 XM\_001649410.2

XM\_017016170.1 XM\_021842099.1  
XM\_017016180.1 XM\_001663131.2  
XM\_017016182.1 XM\_001652741.2  
XM\_017016209.2 XR\_002498897.1  
XM\_017016210.2 XM\_021854476.1  
XM\_017016225.2 XM\_021855333.1  
XM\_017016328.2 XM\_001662970.2  
XM\_017016345.2 XM\_021853751.1  
XM\_017016381.2 XM\_001662901.2  
XM\_017016402.1 XM\_021849208.1  
XM\_017016438.2 XM\_021848986.1  
XM\_017016453.1 XM\_021856163.1  
XM\_017016480.1 XM\_001661522.2  
XM\_017016496.2 XM\_011495107.2  
XM\_017016498.1 XM\_001660323.2  
XM\_017016511.1 XM\_021854676.1  
XM\_017016546.2 XR\_002500021.1  
XM\_017016622.1 XM\_001651045.2  
XM\_017016632.2 XM\_021849571.1  
XM\_017016637.1 XM\_021852760.1  
XM\_017016687.1 XM\_021840358.1  
XM\_017016715.2 XM\_021857451.1  
XM\_017016789.2 XM\_021852196.1  
XM\_017016840.1 XM\_021845735.1  
XM\_017016853.2 XM\_021841193.1  
XM\_017016868.1 XM\_001663790.2  
XM\_017016912.2 XM\_021839664.1  
XM\_017016941.1 XM\_021838982.1  
XM\_017016949.2 XR\_002501765.1  
XM\_017016962.1 XM\_001662516.2  
XM\_017016973.1 XR\_002499810.1  
XM\_017017067.1 XM\_021848152.1  
XM\_017017082.2 XM\_001661829.2  
XM\_017017087.1 XM\_021847478.1  
XM\_017017095.1 XM\_021848966.1  
XM\_017017112.2 XM\_021840529.1  
XM\_017017137.1 XM\_021845186.1  
XM\_017017144.2 XM\_021838949.1  
XM\_017017146.2 XM\_001653614.2  
XM\_017017212.1 XM\_021839096.1  
XM\_017017241.2 XM\_021845971.1  
XM\_017017280.2 XM\_021837970.1  
XM\_017017361.1 XM\_021853711.1  
XM\_017017367.1 XM\_021848959.1  
XM\_017017373.2 XM\_021853580.1  
XM\_017017399.1 XM\_021847923.1  
XM\_017017402.1 XM\_001657778.2  
XM\_017017412.1 XM\_001651506.2  
XM\_017017420.1 XM\_021842776.1  
XM\_017017431.1 XM\_021838984.1

XM\_017017462.2 XM\_021852258.1  
XM\_017017512.1 XM\_021843491.1  
XM\_017017520.1 XM\_001649224.2  
XM\_017017574.1 XM\_021846227.1  
XM\_017017644.1 XM\_021854810.1  
XM\_017017672.1 XM\_021850750.1  
XM\_017017723.1 XM\_021846152.1  
XM\_017017738.2 XM\_021854435.1  
XM\_017017781.1 XR\_002499174.1  
XM\_017017840.1 XM\_021838722.1  
XM\_017017843.2 XM\_021856356.1  
XM\_017017894.1 XM\_021840359.1  
XM\_017017912.1 XM\_021838455.1  
XM\_017017923.1 XM\_021849979.1  
XM\_017017926.1 XR\_002501466.1  
XM\_017017932.1 XM\_021840649.1  
XM\_017017949.2 XM\_001648338.2  
XM\_017018004.1 XM\_021849742.1  
XM\_017018045.1 XM\_001656155.2  
XM\_017018101.2 XM\_021843541.1  
XM\_017018128.1 XM\_021845433.1  
XM\_017018133.1 XM\_021854922.1  
XM\_017018139.1 XM\_021845874.1  
XM\_017018142.1 XM\_021840534.1  
XM\_017018145.1 XM\_021853709.1  
XM\_017018146.1 XM\_021838633.1  
XM\_017018180.1 XM\_021852769.1  
XM\_017018199.1 XM\_021839428.1  
XM\_017018206.1 XM\_021855218.1  
XM\_017018212.1 XM\_021845348.1  
XM\_017018215.1 XM\_021855224.1  
XM\_017018238.1 XM\_001649472.2  
XM\_017018303.1 XM\_021856365.1  
XM\_017018345.1 XM\_021849349.1  
XM\_017018367.1 XM\_021847101.1  
XM\_017018376.2 XM\_001657686.2  
XM\_017018415.2 XM\_021855824.1  
XM\_017018458.1 XM\_021846886.1  
XM\_017018474.2 XR\_002499197.1  
XM\_017018537.1 XM\_021853430.1  
XM\_017018566.1 XM\_021842752.1  
XM\_017018570.1 XR\_002502148.1  
XM\_017018666.2 XM\_021844408.1  
XM\_017018708.1 XM\_021840220.1  
XM\_017018798.2 XM\_021851615.1  
XM\_017018836.1 XM\_021857129.1  
XM\_017018905.1 XM\_021845868.1  
XM\_017018937.1 XM\_021838031.1  
XM\_017018956.1 XM\_021850352.1  
XM\_017018963.2 XM\_021850148.1

XM\_017018973.1 XM\_021851490.1  
XM\_017018981.2 XM\_021857383.1  
XM\_017019010.1 XM\_021837963.1  
XM\_017019020.1 XM\_021842796.1  
XM\_017019037.2 XM\_021840366.1  
XM\_017019057.1 XR\_002499074.1  
XM\_017019071.1 XM\_021856361.1  
XM\_017019130.2 XM\_021848007.1  
XM\_017019152.2 XM\_001656747.2  
XM\_017019172.1 XM\_021841685.1  
XM\_017019217.1 XM\_021852750.1  
XM\_017019229.2 XM\_021845519.1  
XM\_017019237.1 XM\_001655348.2  
XM\_017019240.2 XM\_001657075.2  
XM\_017019248.1 XM\_021848958.1  
XM\_017019252.2 XM\_021845818.1  
XM\_017019270.1 XM\_021853133.1  
XM\_017019276.1 XM\_021848369.1  
XM\_017019288.2 XM\_001657650.2  
XM\_017019297.1 XM\_021846578.1  
XM\_017019322.1 XM\_021841268.1  
XM\_017019335.1 XM\_011494742.2  
XM\_017019352.1 XM\_001652603.2  
XM\_017019442.2 XM\_021840979.1  
XM\_017019463.2 XM\_021839750.1  
XM\_017019466.2 XM\_001660992.2  
XM\_017019469.1 XM\_021849642.1  
XM\_017019473.2 XM\_021837941.1  
XM\_017019535.1 XM\_021839386.1  
XM\_017019572.1 XM\_021843714.1  
XM\_017019591.1 XM\_001659291.2  
XM\_017019606.1 XM\_021840437.1  
XM\_017019626.2 XM\_021851516.1  
XM\_017019644.1 XM\_001655286.2  
XM\_017019652.2 XM\_021849602.1  
XM\_017019739.2 XM\_021857080.1  
XM\_017019767.1 XM\_021843639.1  
XM\_017019775.2 XR\_002501280.1  
XM\_017019782.1 XM\_001656480.2  
XM\_017019783.2 XM\_021855311.1  
XM\_017019800.1 XM\_021839135.1  
XM\_017019815.1 XM\_001653194.2  
XM\_017019836.1 XM\_021840990.1  
XM\_017019962.2 XM\_001661224.3  
XM\_017019969.2 XM\_001662166.2  
XM\_017019991.2 XM\_021848881.1  
XM\_017020016.2 XM\_021840970.1  
XM\_017020021.1 XM\_021855893.1  
XM\_017020023.1 XM\_001660526.2  
XM\_017020052.2 XM\_021857548.1

XM\_017020069.2 XM\_021847348.1  
XM\_017020092.2 XM\_021841761.1  
XM\_017020141.1 XM\_021856536.1  
XM\_017020145.1 XM\_001654760.2  
XM\_017020151.1 XM\_021841426.1  
XM\_017020185.2 XM\_001659729.2  
XM\_017020207.1 XM\_021837550.1  
XM\_017020218.1 XM\_021845900.1  
XM\_017020219.1 XM\_001651413.2  
XM\_017020241.2 XM\_001656292.2  
XM\_017020243.1 XM\_021841549.1  
XM\_017020255.2 XM\_001652877.3  
XM\_017020262.1 XM\_021837549.1  
XM\_017020266.1 XM\_021837759.1  
XM\_017020298.1 XM\_001655070.2  
XM\_017020317.2 XM\_021846984.1  
XM\_017020331.1 XM\_001661910.2  
XM\_017020349.1 XM\_021840181.1  
XM\_017020362.2 XM\_021854220.1  
XM\_017020363.2 XM\_021846853.1  
XM\_017020376.1 XM\_001654716.2  
XM\_017020429.1 XM\_021838985.1  
XM\_017020436.2 XM\_001661385.2  
XM\_017020489.1 XR\_002499277.1  
XM\_017020493.1 XM\_021852651.1  
XM\_017020508.1 XM\_001658657.2  
XM\_017020527.1 XR\_002503185.1  
XM\_017020544.1 XM\_021849207.1  
XM\_017020549.1 XM\_021840151.1  
XM\_017020593.2 XR\_002500076.1  
XM\_017020604.1 XM\_021847381.1  
XM\_017020609.1 XM\_021847223.1  
XM\_017020647.1 XM\_021851465.1  
XM\_017020680.2 XR\_002502610.1  
XM\_017020684.1 XM\_021841679.1  
XM\_017020704.2 XM\_001656722.2  
XM\_017020733.2 XM\_021838270.1  
XM\_017020799.2 XM\_021839755.1  
XM\_017020815.1 XM\_021851724.1  
XM\_017020829.2 XM\_021838806.1  
XM\_017020833.1 XM\_021854434.1  
XM\_017020846.1 XM\_021850791.1  
XM\_017020853.2 XM\_021852661.1  
XM\_017020859.2 XM\_001648958.2  
XM\_017020875.1 XM\_021854468.1  
XM\_017020926.1 XM\_021840981.1  
XM\_017020976.1 XM\_021854322.1  
XM\_017020988.1 XM\_001652778.2  
XM\_017020993.1 XM\_001663665.2  
XM\_017021035.2 XM\_021855729.1

XM\_017021070.1 XM\_021842197.1  
XM\_017021071.1 XM\_021838811.1  
XM\_017021079.1 XM\_001658502.2  
XM\_017021104.2 XM\_021839427.1  
XM\_017021113.2 XM\_021855585.1  
XM\_017021121.2 XM\_021853089.1  
XM\_017021147.1 XM\_021849731.1  
XM\_017021156.2 XM\_021842193.1  
XM\_017021177.1 XM\_021842192.1  
XM\_017021203.1 XM\_021847116.1  
XM\_017021212.1 XM\_021851924.1  
XM\_017021216.2 XM\_001657484.2  
XM\_017021232.1 XM\_021857653.1  
XM\_017021249.2 XM\_021838996.1  
XM\_017021253.2 XM\_001656197.2  
XM\_017021271.1 XR\_002501393.1  
XM\_017021293.1 XM\_021849835.1  
XM\_017021307.2 XM\_021851915.1  
XM\_017021313.1 XM\_021846213.1  
XM\_017021353.1 XM\_021852535.1  
XM\_017021373.1 XM\_001650066.2  
XM\_017021390.2 XM\_001659607.2  
XM\_017021421.2 XM\_021837551.1  
XM\_017021431.1 XM\_021850987.1  
XM\_017021433.1 XR\_002500935.1  
XM\_017021437.2 XM\_001657208.2  
XM\_017021452.1 XM\_021843905.1  
XM\_017021455.1 XM\_001651158.2  
XM\_017021476.1 XM\_021857449.1  
XM\_017021517.1 XM\_001655055.2  
XM\_017021576.1 XM\_021842149.1  
XM\_017021662.1 XM\_021851040.1  
XM\_017021668.2 XM\_001659550.2  
XM\_017021678.2 XM\_021846145.1  
XM\_017021690.2 XR\_002501655.1  
XM\_017021701.1 XM\_021849020.1  
XM\_017021702.1 XM\_021855889.1  
XM\_017021727.2 XM\_021857724.1  
XM\_017021734.1 XM\_001651047.2  
XM\_017021735.1 XM\_001659714.2  
XM\_017021755.2 XM\_021848993.1  
XM\_017021774.1 XM\_001654826.2  
XM\_017021799.2 XM\_021837411.1  
XM\_017021820.2 XM\_001658878.2  
XM\_017021867.2 XM\_001663011.2  
XM\_017021897.2 XM\_001657179.2  
XM\_017021927.1 XM\_021840650.1  
XM\_017021933.1 XM\_021838407.1  
XM\_017021937.2 XM\_001660912.2  
XM\_017021940.2 XM\_021851781.1



XM\_017022007.1 XM\_021838533.1  
XM\_017022031.2 XM\_021837752.1  
XM\_017022073.1 XM\_021840695.1  
XM\_017022099.1 XM\_021848899.1  
XM\_017022110.1 XR\_002501327.1  
XM\_017022137.1 XM\_021840980.1  
XM\_017022160.2 XM\_021837846.1  
XM\_017022198.2 XM\_021838581.1  
XM\_017022201.1 XM\_001663983.2  
XM\_017022226.1 XM\_021853898.1  
XM\_017022233.1 XM\_021842229.1  
XM\_017022236.2 XM\_001650712.2  
XM\_017022259.1 XM\_021852369.1  
XM\_017022276.1 XM\_021841681.1  
XM\_017022286.1 XM\_001662644.3  
XM\_017022298.1 XM\_021838398.1  
XM\_017022302.1 XM\_021850313.1  
XM\_017022310.2 XM\_001651507.2  
XM\_017022349.1 XM\_001660082.2  
XM\_017022370.1 XM\_021849739.1  
XM\_017022374.2 XM\_021852481.1  
XM\_017022384.2 XM\_021838404.1  
XM\_017022387.2 XM\_021843385.1  
XM\_017022450.1 XM\_021850341.1  
XM\_017022463.2 XM\_021838807.1  
XM\_017022540.1 XM\_021853163.1  
XM\_017022570.1 XM\_021839306.1  
XM\_017022575.2 XM\_021840527.1  
XM\_017022657.1 XR\_002501758.1  
XM\_017022659.1 XM\_021845694.1  
XM\_017022673.2 XM\_021852852.1  
XM\_017022685.1 XR\_002500264.1  
XM\_017022712.2 XM\_021840239.1  
XM\_017022761.1 XM\_021854433.1  
XM\_017022778.1 XM\_001661157.2  
XM\_017022815.2 XM\_021847224.1  
XM\_017022822.2 XM\_021853074.1  
XM\_017022824.2 XR\_002499731.1  
XM\_017022876.1 XM\_001652468.2  
XM\_017022912.1 XR\_002502727.1  
XM\_017022921.2 XM\_021844770.1  
XM\_017022925.1 XM\_001656833.2  
XM\_017022928.1 XM\_021851838.1  
XM\_017022960.2 XM\_001661928.2  
XM\_017022968.1 XR\_002500324.1  
XM\_017023019.1 XM\_001656505.2  
XM\_017023077.1 XM\_021841762.1  
XM\_017023098.1 XR\_002502079.1  
XM\_017023099.1 XM\_001656716.3  
XM\_017023190.2 XR\_002500862.1

XM\_017023193.2 XM\_021857399.1  
XM\_017023266.2 XM\_021838737.1  
XM\_017023277.1 XM\_021848106.1  
XM\_017023281.1 XM\_021839849.1  
XM\_017023297.2 XM\_021837894.1  
XM\_017023303.2 XM\_021844578.1  
XM\_017023350.1 XM\_021837823.1  
XM\_017023383.2 XM\_021856986.1  
XM\_017023403.1 XM\_001656309.2  
XM\_017023424.2 XM\_021847879.1  
XM\_017023477.1 XM\_021848892.1  
XM\_017023527.1 XM\_021853398.1  
XM\_017023532.1 XM\_021857361.1  
XM\_017023550.1 XM\_021839756.1  
XM\_017023554.1 XM\_021840997.1  
XM\_017023625.1 XM\_001648434.2  
XM\_017023634.2 XM\_021855381.1  
XM\_017023707.2 XM\_021857270.1  
XM\_017023715.1 XM\_021848466.1  
XM\_017023723.2 XM\_001661478.2  
XM\_017023751.1 XM\_021857679.1  
XM\_017023757.1 XM\_021842539.1  
XM\_017023770.1 XM\_021840140.1  
XM\_017023786.2 XM\_001664232.2  
XM\_017023808.1 XM\_001657293.2  
XM\_017023853.2 XR\_002498607.1  
XM\_017023859.2 XM\_021845993.1  
XM\_017023966.2 XM\_021837622.1  
XM\_017023974.1 XM\_021850458.1  
XM\_017023991.1 XM\_021845429.1  
XM\_017024006.1 XM\_021838047.1  
XM\_017024027.1 XM\_021853189.1  
XM\_017024038.2 XM\_001649726.2  
XM\_017024040.2 XM\_021857681.1  
XM\_017024057.1 XM\_021837523.1  
XM\_017024075.2 XM\_021838635.1  
XM\_017024079.1 XM\_021855548.1  
XM\_017024102.1 XM\_021850226.1  
XM\_017024122.1 XM\_021853124.1  
XM\_017024149.2 XM\_001652347.2  
XM\_017024200.1 XM\_021838803.1  
XM\_017024209.1 XM\_001660791.2  
XM\_017024228.1 XM\_021841078.1  
XM\_017024273.1 XM\_021852051.1  
XM\_017024277.1 XM\_021850447.1  
XM\_017024289.2 XM\_001663742.2  
XM\_017024297.1 XR\_002503284.1  
XM\_017024325.1 XM\_021839114.1  
XM\_017024338.1 XM\_021841847.1  
XM\_017024371.1 XM\_001658024.2

XM\_017024409.1 XM\_001657276.2  
XM\_017024434.1 XM\_021839115.1  
XM\_017024468.2 XR\_002498857.1  
XM\_017024484.1 XR\_002498868.1  
XM\_017024543.2 XR\_002502657.1  
XM\_017024574.1 XM\_021840988.1  
XM\_017024618.1 XR\_002501529.1  
XM\_017024641.2 XM\_021855586.1  
XM\_017024642.1 XM\_021846004.1  
XM\_017024730.2 XM\_021856368.1  
XM\_017024731.2 XM\_021855379.1  
XM\_017024736.1 XM\_021855138.1  
XM\_017024740.1 XM\_021857525.1  
XM\_017024764.2 XM\_021838222.1  
XM\_017024777.1 XM\_001663386.2  
XM\_017024808.1 XM\_001662851.2  
XM\_017024825.1 XM\_001653316.2  
XM\_017024841.1 XM\_021848686.1  
XM\_017024844.2 XM\_021849743.1  
XM\_017024845.2 XM\_021849073.1  
XM\_017024846.2 XM\_001657465.2  
XM\_017024921.2 XM\_001652306.2  
XM\_017024955.1 XM\_001647878.2  
XM\_017024989.1 XM\_001652231.2  
XM\_017025036.2 XM\_011494870.2  
XM\_017025061.1 XM\_001650481.2  
XM\_017025095.1 XM\_021855923.1  
XM\_017025096.1 XM\_021854906.1  
XM\_017025113.1 XM\_021842175.1  
XM\_017025132.2 XM\_001660253.2  
XM\_017025146.1 XM\_021850665.1  
XM\_017025159.2 XM\_021851995.1  
XM\_017025166.2 XM\_021854895.1  
XM\_017025170.1 XM\_021841538.1  
XM\_017025231.1 XM\_021848236.1  
XM\_017025233.1 XM\_021842012.1  
XM\_017025305.1 XM\_001656366.2  
XM\_017025350.1 XM\_021851564.1  
XM\_017025374.2 XM\_001651438.2  
XM\_017025377.1 XM\_021838134.1  
XM\_017025397.2 XM\_001659743.2  
XM\_017025409.2 XM\_001656502.2  
XM\_017025441.1 XM\_001663051.2  
XM\_017025451.1 XM\_021842572.1  
XM\_017025453.1 XM\_021849108.1  
XM\_017025454.2 XM\_021838781.1  
XM\_017025514.2 XM\_021850476.1  
XM\_017025530.1 XM\_021851843.1  
XM\_017025561.1 XM\_021844018.1  
XM\_017025574.1 XM\_001650801.2

XM\_017025599.2 XM\_001652367.2  
XM\_017025663.2 XM\_021849304.1  
XM\_017025669.2 XM\_021837615.1  
XM\_017025684.1 XM\_021838790.1  
XM\_017025716.1 XM\_001661129.2  
XM\_017025728.2 XR\_002503147.1  
XM\_017025787.1 XM\_021855918.1  
XM\_017025803.2 XM\_021845979.1  
XM\_017025808.2 XM\_021844840.1  
XM\_017025894.1 XM\_021853164.1  
XM\_017025927.2 XR\_002500500.1  
XM\_017025967.1 XR\_002501319.1  
XM\_017025993.1 XM\_021847790.1  
XM\_017026007.1 XM\_021851839.1  
XM\_017026035.2 XM\_001658610.2  
XM\_017026086.1 XM\_021853598.1  
XM\_017026099.1 XM\_001648855.2  
XM\_017026150.1 XM\_021855182.1  
XM\_017026170.1 XM\_021845435.1  
XM\_017026172.2 XM\_021851644.1  
XM\_017026191.1 XR\_002500798.1  
XM\_017026200.1 XM\_021843980.1  
XM\_017026202.2 XM\_021849837.1  
XM\_017026203.2 XR\_002501965.1  
XM\_017026210.1 XM\_001663809.2  
XM\_017026213.1 XM\_021847221.1  
XM\_017026216.1 XM\_021852853.1  
XM\_017026243.2 XM\_021853672.1  
XM\_017026246.1 XM\_021843536.1  
XM\_017026262.2 XM\_021852540.1  
XM\_017026269.1 XM\_001657109.2  
XM\_017026324.1 XM\_021853129.1  
XM\_017026354.1 XM\_021842074.1  
XM\_017026411.2 XM\_021853791.1  
XM\_017026445.1 XM\_021850744.1  
XM\_017026456.1 XM\_001655545.2  
XM\_017026470.2 XM\_001659214.2  
XM\_017026523.1 XM\_021845547.1  
XM\_017026530.2 XM\_001650645.2  
XM\_017026541.1 XM\_021856031.1  
XM\_017026551.1 XM\_021844796.1  
XM\_017026558.1 XR\_002499315.1  
XM\_017026573.1 XM\_001650118.2  
XM\_017026601.1 XM\_021848363.1  
XM\_017026643.1 XM\_021843384.1  
XM\_017026711.1 XM\_021846215.1  
XM\_017026726.1 XM\_021849430.1  
XM\_017026746.1 XM\_021855373.1  
XM\_017026752.1 XM\_001658980.2  
XM\_017026771.1 XR\_002498578.1

XM\_017026798.2 XM\_021838758.1  
XM\_017026855.1 XM\_021842803.1  
XM\_017026857.2 XM\_021849636.1  
XM\_017026928.1 XM\_021838282.1  
XM\_017026942.1 XM\_021857355.1  
XM\_017026983.1 XM\_001663411.2  
XM\_017027020.1 XR\_002500082.1  
XM\_017027040.1 XM\_021852818.1  
XM\_017027058.1 XM\_001660394.2  
XM\_017027074.1 XM\_001653536.2  
XM\_017027077.1 XM\_021837259.1  
XM\_017027094.1 XM\_001658778.2  
XM\_017027096.1 XM\_021849652.1  
XM\_017027113.2 XM\_021857286.1  
XM\_017027139.1 XM\_001660279.2  
XM\_017027153.1 XM\_021848855.1  
XM\_017027204.2 XR\_002498725.1  
XM\_017027220.2 XM\_021839906.1  
XM\_017027231.1 XM\_021838905.1  
XM\_017027258.1 XM\_001654414.2  
XM\_017027297.2 XM\_021853036.1  
XM\_017027305.1 XM\_021852488.1  
XM\_017027312.1 XM\_021837423.1  
XM\_017027316.1 XM\_021843545.1  
XM\_017027327.1 XM\_021837413.1  
XM\_017027334.1 XM\_021842797.1  
XM\_017027358.1 XM\_021851639.1  
XM\_017027362.1 XM\_001652110.2  
XM\_017027374.2 XR\_002498995.1  
XM\_017027411.2 XM\_011494914.2  
XM\_017027428.1 XR\_002502337.1  
XM\_017027430.1 XM\_021841131.1  
XM\_017027451.1 XM\_001649703.2  
XM\_017027453.1 XM\_021851201.1  
XM\_017027461.1 XM\_021840287.1  
XM\_017027464.1 XM\_001648178.2  
XM\_017027481.1 XM\_001656842.2  
XM\_017027522.2 XM\_021853701.1  
XM\_017027529.1 XM\_021851914.1  
XM\_017027532.1 XM\_021841500.1  
XM\_017027554.1 XM\_021848730.1  
XM\_017027565.1 XM\_001659344.2  
XM\_017027592.2 XM\_001649222.2  
XM\_017027600.2 XM\_021849437.1  
XM\_017027602.1 XM\_021841744.1  
XM\_017027628.1 XM\_001662619.2  
XM\_017027646.1 XM\_021841351.1  
XM\_017027647.2 XM\_021847936.1  
XM\_017027667.1 XM\_021847193.1  
XM\_017027678.1 XM\_021856905.1

XM\_017027692.2 XM\_021839140.1  
XM\_017027736.2 XM\_021845526.1  
XM\_017027744.2 XM\_021843543.1  
XM\_017027754.2 XR\_002501068.1  
XM\_017027784.2 XM\_001658307.2  
XM\_017027803.2 XM\_021854062.1  
XM\_017027827.2 XM\_021841881.1  
XM\_017027894.2 XM\_021847069.1  
XM\_017027915.2 XM\_021847071.1  
XM\_017027951.2 XM\_001657604.2  
XM\_017027969.2 XM\_021842421.1  
XM\_017027980.2 XM\_021838372.1  
XM\_017027982.1 XM\_001654041.2  
XM\_017027998.1 XM\_021845442.1  
XM\_017027999.1 XM\_021839566.1  
XM\_017028064.1 XM\_001660072.2  
XM\_017028096.1 XM\_021845576.1  
XM\_017028101.1 XM\_021849404.1  
XM\_017028109.1 XM\_021853702.1  
XM\_017028155.1 XM\_021843661.1  
XM\_017028160.1 XM\_021838777.1  
XM\_017028258.1 XM\_021838269.1  
XM\_017028271.1 XM\_021850486.1  
XM\_017028344.1 XM\_001652585.2  
XM\_017028362.2 XM\_021852714.1  
XM\_017028415.2 XM\_021838090.1  
XM\_017028440.2 XM\_001661396.2  
XM\_017028451.2 XR\_002499058.1  
XM\_017028459.2 XM\_021841353.1  
XM\_017028474.1 XM\_021838989.1  
XM\_017028485.2 XM\_021852489.1  
XM\_017028510.1 XM\_021839244.1  
XM\_017028546.1 XM\_021851513.1  
XM\_017028556.1 XM\_021852046.1  
XM\_017028560.1 XM\_021854839.1  
XM\_017028580.1 XM\_021852899.1  
XM\_017028612.1 XM\_001653774.2  
XM\_017028637.1 XM\_001661887.2  
XM\_017028643.2 XM\_021856380.1  
XM\_017028667.2 XM\_021843540.1  
XM\_017028698.1 XR\_002502468.1  
XM\_017028747.2 XM\_021854413.1  
XM\_017028769.2 XM\_021855171.1  
XM\_017028774.1 XM\_001658057.2  
XM\_017028788.1 XM\_021837241.1  
XM\_017028809.2 XM\_021849516.1  
XM\_017028814.1 XM\_021838006.1  
XM\_017028825.1 XM\_001657295.2  
XM\_017028836.1 XM\_001653378.2  
XM\_017028839.1 XM\_021856150.1

XM\_017028896.2 XM\_021849757.1  
XM\_017028920.1 XM\_021855353.1  
XM\_017028955.2 XM\_021852062.1  
XM\_017028957.2 XM\_021852493.1  
XM\_017028971.2 XM\_001656760.2  
XM\_017028975.2 XM\_021841952.1  
XM\_017028976.1 XM\_021837613.1  
XM\_017029015.1 XM\_021853986.1  
XM\_017029035.2 XM\_021854412.1  
XM\_017029053.1 XM\_021853623.1  
XM\_017029099.2 XM\_021851330.1  
XM\_017029119.1 XM\_001661501.2  
XM\_017029130.1 XR\_002502325.1  
XM\_017029221.1 XM\_021837408.1  
XM\_017029228.1 XM\_001662327.2  
XM\_017029364.1 XM\_001656284.2  
XM\_017029391.1 XM\_021848507.1  
XM\_017029416.1 XM\_021846331.1  
XM\_017029418.1 XR\_002502667.1  
XM\_017029450.2 XM\_021855911.1  
XM\_017029464.2 XM\_001647574.2  
XM\_017029469.1 XM\_021842552.1  
XM\_017029479.1 XM\_021837440.1  
XM\_017029491.2 XM\_021839514.1  
XM\_017029513.1 XM\_001651723.2  
XM\_017029523.1 XM\_021853122.1  
XM\_017029531.1 XM\_021847734.1  
XM\_017029571.1 XM\_001650885.2  
XM\_017029575.1 XM\_021848460.1  
XM\_017029578.1 XM\_001659416.2  
XM\_017029585.2 XM\_021857391.1  
XM\_017029588.2 XR\_002501395.1  
XM\_017029590.2 XM\_001653009.2  
XM\_017029602.1 XM\_001652157.2  
XM\_017029619.2 XM\_021847867.1  
XM\_017029631.1 XM\_021847251.1  
XM\_017029647.2 XM\_001650794.2  
XM\_017029662.1 XM\_021848724.1  
XM\_017029675.1 XM\_021844771.1  
XM\_017029679.1 XM\_001661840.3  
XM\_017029681.1 XM\_021850666.1  
XM\_017029689.2 XM\_021846124.1  
XM\_017029708.1 XM\_021837370.1  
XM\_017029726.2 XM\_021849433.1  
XM\_017029740.1 XR\_002500035.1  
XM\_017029762.1 XM\_021840762.1  
XM\_017029770.1 XM\_021853080.1  
XM\_017029783.2 XM\_021838369.1  
XM\_017029817.1 XM\_021849926.1  
XM\_017029821.1 XM\_021855363.1

XM\_017029872.1 XR\_002498688.1  
XM\_017029873.1 XM\_011494794.2  
XM\_017029890.2 XR\_002499010.1  
XM\_017029893.2 XR\_002502479.1  
XM\_017029911.1 XM\_021838991.1  
XM\_017029916.1 XM\_021841141.1  
XM\_017029920.1 XR\_002501830.1  
XM\_017029968.1 XM\_001656672.2  
XM\_017030103.1 XM\_001657162.2  
XM\_017030116.1 XM\_001655281.2  
XM\_017030122.1 XM\_021849273.1  
XM\_017030301.2 XM\_021841263.1  
XM\_024446078.1 XR\_002498626.1  
XM\_024446080.1 XM\_021848071.1  
XM\_024446127.1 XM\_021854070.1  
XM\_024446137.1 XR\_002502916.1  
XM\_024446138.1 XM\_021849252.1  
XM\_024446148.1 XM\_021847959.1  
XM\_024446149.1 XM\_021848221.1  
XM\_024446155.1 XR\_002498848.1  
XM\_024446163.1 XM\_001656286.2  
XM\_024446181.1 XM\_021849283.1  
XM\_024446216.1 XM\_021845747.1  
XM\_024446243.1 XM\_021837606.1  
XM\_024446265.1 XM\_021847067.1  
XM\_024446333.1 XM\_021850271.1  
XM\_024446354.1 XM\_021838954.1  
XM\_024446367.1 XM\_021850187.1  
XM\_024446378.1 XM\_001660173.2  
XM\_024446385.1 XM\_021839031.1  
XM\_024446424.1 XM\_001651536.2  
XM\_024446428.1 XM\_021844799.1  
XM\_024446430.1 XR\_002499374.1  
XM\_024446431.1 XM\_021852971.1  
XM\_024446468.1 XM\_021839145.1  
XM\_024446524.1 XM\_021853275.1  
XM\_024446529.1 XM\_021855385.1  
XM\_024446533.1 XM\_001652374.2  
XM\_024446618.1 XM\_021853626.1  
XM\_024446636.1 XM\_021839241.1  
XM\_024446655.1 XM\_021838046.1  
XM\_024446664.1 XM\_021856985.1  
XM\_024446671.1 XM\_021841395.1  
XM\_024446692.1 XM\_021850977.1  
XM\_024446709.1 XM\_001650312.2  
XM\_024446726.1 XM\_021851845.1  
XM\_024446748.1 XM\_021843583.1  
XM\_024446783.1 XM\_001653977.2  
XM\_024446786.1 XM\_021853928.1  
XM\_024446817.1 XR\_002499833.1



XM\_024446820.1 XM\_021852464.1  
XM\_024446838.1 XM\_021840309.1  
XM\_024446876.1 XM\_021850831.1  
XM\_024446881.1 XM\_021841769.1  
XM\_024446888.1 XM\_021849137.1  
XM\_024446896.1 XM\_021845744.1  
XM\_024446963.1 XM\_021848409.1  
XM\_024446969.1 XM\_021842736.1  
XM\_024446980.1 XM\_001655096.2  
XM\_024446986.1 XM\_021849670.1  
XM\_024447053.1 XM\_021843713.1  
XM\_024447054.1 XR\_002500671.1  
XM\_024447055.1 XM\_001654743.2  
XM\_024447057.1 XM\_021849140.1  
XM\_024447086.1 XM\_001654657.2  
XM\_024447113.1 XM\_001655050.2  
XM\_024447120.1 XM\_021854783.1  
XM\_024447136.1 XM\_021840975.1  
XM\_024447140.1 XM\_021846695.1  
XM\_024447141.1 XM\_021856832.1  
XM\_024447228.1 XM\_021849203.1  
XM\_024447266.1 XM\_021853376.1  
XM\_024447270.1 XM\_021848516.1  
XM\_024447272.1 XM\_021857471.1  
XM\_024447295.1 XM\_021849353.1  
XM\_024447308.1 XM\_021848721.1  
XM\_024447311.1 XM\_001656546.2  
XM\_024447315.1 XM\_021837783.1  
XM\_024447354.1 XR\_002501320.1  
XM\_024447367.1 XM\_001655604.2  
XM\_024447377.1 XR\_002500127.1  
XM\_024447380.1 XM\_001648896.2  
XM\_024447384.1 XM\_021843880.1  
XM\_024447434.1 XM\_021853784.1  
XM\_024447506.1 XM\_021842697.1  
XM\_024447538.1 XR\_002499477.1  
XM\_024447549.1 XM\_021839156.1  
XM\_024447573.1 XM\_021852898.1  
XM\_024447630.1 XM\_021856353.1  
XM\_024447632.1 XM\_021854396.1  
XM\_024447681.1 XM\_001654227.2  
XM\_024447699.1 XM\_021856839.1  
XM\_024447735.1 XM\_001656267.2  
XM\_024447736.1 XM\_001658837.2  
XM\_024447763.1 XM\_021840105.1  
XM\_024447765.1 XM\_021852042.1  
XM\_024447767.1 XM\_021837792.1  
XM\_024447784.1 XM\_021842674.1  
XM\_024447830.1 XM\_021850479.1  
XM\_024447865.1 XM\_001662010.2

XM\_024447867.1 XM\_001660419.2  
XM\_024447868.1 XM\_021852733.1  
XM\_024447902.1 XM\_021843902.1  
XM\_024447967.1 XR\_002501547.1  
XM\_024447981.1 XM\_001653543.2  
XM\_024447986.1 XM\_021842526.1  
XM\_024448026.1 XM\_021849195.1  
XM\_024448038.1 XM\_021844607.1  
XM\_024448081.1 XM\_021837646.1  
XM\_024448083.1 XM\_021853320.1  
XM\_024448086.1 XM\_021845419.1  
XM\_024448100.1 XM\_021855356.1  
XM\_024448120.1 XR\_002502800.1  
XM\_024448143.1 XM\_021853342.1  
XM\_024448156.1 XM\_021853351.1  
XM\_024448170.1 XM\_021847034.1  
XM\_024448223.1 XM\_021856373.1  
XM\_024448241.1 XM\_021837899.1  
XM\_024448243.1 XR\_002501879.1  
XM\_024448257.1 XR\_002499227.1  
XM\_024448284.1 XM\_021842128.1  
XM\_024448286.1 XR\_002501099.1  
XM\_024448287.1 XR\_002500701.1  
XM\_024448303.1 XM\_021851447.1  
XM\_024448319.1 XM\_021842038.1  
XM\_024448321.1 XM\_021846243.1  
XM\_024448322.1 XM\_001653256.2  
XM\_024448341.1 XM\_021854373.1  
XM\_024448342.1 XM\_001660112.2  
XM\_024448358.1 XR\_002501276.1  
XM\_024448381.1 XM\_001658127.2  
XM\_024448385.1 XM\_021842980.1  
XM\_024448408.1 XM\_021840841.1  
XM\_024448426.1 XM\_001650482.2  
XM\_024448492.1 XM\_021855482.1  
XM\_024448494.1 XM\_001650817.2  
XM\_024448501.1 XM\_021856907.1  
XM\_024448510.1 XM\_021848725.1  
XM\_024448536.1 XM\_021853321.1  
XM\_024448572.1 XM\_001664087.2  
XM\_024448689.1 XM\_021837811.1  
XM\_024448694.1 XM\_021850983.1  
XM\_024448739.1 XM\_001663784.2  
XM\_024448740.1 XM\_001658162.2  
XM\_024448741.1 XM\_001660267.2  
XM\_024448767.1 XM\_021856972.1  
XM\_024448772.1 XM\_001659220.2  
XM\_024448776.1 XM\_021840627.1  
XM\_024448806.1 XR\_002499695.1  
XM\_024448832.1 XR\_002499488.1

XM\_024448861.1 XR\_002498850.1  
XM\_024448869.1 XM\_021852897.1  
XM\_024448885.1 XM\_021857394.1  
XM\_024448954.1 XM\_021849580.1  
XM\_024449008.1 XM\_021845590.1  
XM\_024449013.1 XM\_001647845.2  
XM\_024449022.1 XM\_021841276.1  
XM\_024449024.1 XM\_021855376.1  
XM\_024449047.1 XM\_001651917.2  
XM\_024449052.1 XM\_021856854.1  
XM\_024449059.1 XM\_021844856.1  
XM\_024449073.1 XM\_021851422.1  
XM\_024449085.1 XM\_021852418.1  
XM\_024449096.1 XR\_002502819.1  
XM\_024449112.1 XM\_021841885.1  
XM\_024449130.1 XM\_021837588.1  
XM\_024449134.1 XR\_002503018.1  
XM\_024449152.1 XM\_021837393.1  
XM\_024449190.1 XM\_021851286.1  
XM\_024449213.1 XR\_002499598.1  
XM\_024449229.1 XM\_021843733.1  
XM\_024449252.1 XM\_021855939.1  
XM\_024449270.1 XM\_021841502.1  
XM\_024449275.1 XM\_021839951.1  
XM\_024449278.1 XM\_001648394.2  
XM\_024449290.1 XM\_021849010.1  
XM\_024449300.1 XM\_021847217.1  
XM\_024449312.1 XM\_021853596.1  
XM\_024449326.1 XM\_021850072.1  
XM\_024449373.1 XM\_021842566.1  
XM\_024449390.1 XM\_021851210.1  
XM\_024449420.1 XM\_021847092.1  
XM\_024449425.1 XM\_001657186.2  
XM\_024449470.1 XM\_021856845.1  
XM\_024449477.1 XM\_001648705.2  
XM\_024449495.1 XR\_002499105.1  
XM\_024449520.1 XM\_021840043.1  
XM\_024449532.1 XM\_001647895.2  
XM\_024449600.1 XM\_001653340.2  
XM\_024449618.1 XM\_021842126.1  
XM\_024449636.1 XR\_002502550.1  
XM\_024449646.1 XM\_021849669.1  
XM\_024449649.1 XM\_021840635.1  
XM\_024449659.1 XM\_021837416.1  
XM\_024449699.1 XM\_021848753.1  
XM\_024449704.1 XM\_021854254.1  
XM\_024449717.1 XM\_001653734.2  
XM\_024449721.1 XM\_021847347.1  
XM\_024449739.1 XM\_001650987.2  
XM\_024449744.1 XM\_021838290.1

XM\_024449748.1 XM\_021837787.1  
XM\_024449781.1 XM\_021845984.1  
XM\_024449813.1 XM\_021846388.1  
XM\_024449823.1 XM\_021837270.1  
XM\_024449889.1 XM\_021842747.1  
XM\_024449896.1 XM\_001653317.2  
XM\_024449912.1 XM\_021850902.1  
XM\_024449930.1 XM\_021838307.1  
XM\_024449946.1 XM\_021856765.1  
XM\_024449957.1 XM\_001661906.2  
XM\_024449959.1 XM\_001660295.2  
XM\_024449977.1 XM\_001662877.2  
XM\_024449992.1 XM\_021838133.1  
XM\_024449995.1 XR\_002500452.1  
XM\_024450008.1 XM\_021843284.1  
XM\_024450013.1 XM\_021851009.1  
XM\_024450055.1 XM\_021837455.1  
XM\_024450070.1 XM\_021853920.1  
XM\_024450075.1 XM\_021848893.1  
XM\_024450112.1 XM\_021843153.1  
XM\_024450134.1 XM\_021857360.1  
XM\_024450147.1 XM\_021855955.1  
XM\_024450151.1 XR\_002499165.1  
XM\_024450153.1 XM\_021840736.1  
XM\_024450213.1 XM\_021856230.1  
XM\_024450219.1 XM\_021844280.1  
XM\_024450233.1 XM\_021854479.1  
XM\_024450271.1 XM\_001663233.2  
XM\_024450280.1 XM\_021855711.1  
XM\_024450289.1 XM\_001657096.2  
XM\_024450306.1 XM\_021838125.1  
XM\_024450308.1 XR\_002499677.1  
XM\_024450328.1 XM\_021840768.1  
XM\_024450356.1 XM\_021849752.1  
XM\_024450374.1 XM\_021842110.1  
XM\_024450409.1 XM\_001661825.2  
XM\_024450414.1 XR\_002499164.1  
XM\_024450440.1 XM\_001656246.2  
XM\_024450441.1 XM\_021838312.1  
XM\_024450455.1 XM\_021852482.1  
XM\_024450463.1 XM\_021854465.1  
XM\_024450468.1 XM\_021837768.1  
XM\_024450471.1 XM\_021849944.1  
XM\_024450476.1 XM\_021854242.1  
XM\_024450477.1 XM\_021840763.1  
XM\_024450512.1 XM\_021851844.1  
XM\_024450553.1 XR\_002500390.1  
XM\_024450568.1 XM\_021851694.1  
XM\_024450586.1 XR\_002499166.1  
XM\_024450595.1 XM\_021837737.1

XM\_024450624.1 XM\_021844561.1  
XM\_024450671.1 XM\_021856139.1  
XM\_024450698.1 XM\_021846608.1  
XM\_024450710.1 XM\_021853167.1  
XM\_024450719.1 XM\_001653123.2  
XM\_024450722.1 XM\_021840617.1  
XM\_024450729.1 XM\_021840843.1  
XM\_024450757.1 XM\_021838381.1  
XM\_024450798.1 XM\_021849271.1  
XM\_024450817.1 XM\_021857569.1  
XM\_024450818.1 XM\_001648579.2  
XM\_024450823.1 XM\_021841775.1  
XM\_024450875.1 XM\_001661418.2  
XM\_024450885.1 XM\_001660740.2  
XM\_024450890.1 XM\_001653195.2  
XM\_024450930.1 XM\_001660109.2  
XM\_024450995.1 XM\_021840299.1  
XM\_024451026.1 XM\_021847138.1  
XM\_024451045.1 XM\_001662382.2  
XM\_024451050.1 XM\_021837763.1  
XM\_024451061.1 XM\_001658906.2  
XM\_024451070.1 XM\_001659516.2  
XM\_024451076.1 XM\_001652395.2  
XM\_024451114.1 XM\_001651025.2  
XM\_024451116.1 XM\_001662411.2  
XM\_024451160.1 XM\_021837556.1  
XM\_024451249.1 XM\_021846253.1  
XM\_024451268.1 XM\_021847617.1  
XM\_024451275.1 XM\_021840072.1  
XM\_024451281.1 XM\_021853771.1  
XM\_024451308.1 XM\_021837587.1  
XM\_024451331.1 XM\_021855973.1  
XM\_024451338.1 XM\_021840702.1  
XM\_024451380.1 XM\_021841208.1  
XM\_024451397.1 XM\_021853319.1  
XM\_024451399.1 XM\_021845732.1  
XM\_024451405.1 XM\_021856249.1  
XM\_024451450.1 XM\_021838559.1  
XM\_024451453.1 XM\_021854314.1  
XM\_024451462.1 XR\_002499291.1  
XM\_024451473.1 XM\_021849841.1  
XM\_024451487.1 XM\_021843180.1  
XM\_024451499.1 XR\_002498895.1  
XM\_024451527.1 XM\_021839568.1  
XM\_024451531.1 XM\_001661775.2  
XM\_024451533.1 XM\_021854892.1  
XM\_024451534.1 XM\_001656763.2  
XM\_024451558.1 XM\_001657877.3  
XM\_024451575.1 XM\_021854066.1  
XM\_024451600.1 XM\_001651551.2

XM\_024451622.1 XM\_001652052.2  
XM\_024451625.1 XM\_001649718.2  
XM\_024451629.1 XM\_021838210.1  
XM\_024451647.1 XR\_002499722.1  
XM\_024451726.1 XM\_001661707.2  
XM\_024451732.1 XM\_021849196.1  
XM\_024451734.1 XM\_001647968.2  
XM\_024451764.1 XM\_021847307.1  
XM\_024451770.1 XM\_021842981.1  
XM\_024451774.1 XM\_021840596.1  
XM\_024451779.1 XM\_021846114.1  
XM\_024451806.1 XM\_021852462.1  
XM\_024451824.1 XM\_001653747.3  
XM\_024451827.1 XM\_021849248.1  
XM\_024451909.1 XM\_001654308.2  
XM\_024451916.1 XR\_002501914.1  
XM\_024451922.1 XM\_021846798.1  
XM\_024451956.1 XM\_001658084.2  
XM\_024451961.1 XM\_001658246.2  
XM\_024451974.1 XM\_021842028.1  
XM\_024451994.1 XM\_021850137.1  
XM\_024452005.1 XM\_021837385.1  
XM\_024452032.1 XR\_002501925.1  
XM\_024452037.1 XM\_021849537.1  
XM\_024452062.1 XM\_021837643.1  
XM\_024452067.1 XM\_001652466.2  
XM\_024452081.1 XM\_021856756.1  
XM\_024452091.1 XM\_021847063.1  
XM\_024452131.1 XM\_021850993.1  
XM\_024452132.1 XM\_021848024.1  
XM\_024452133.1 XM\_021837789.1  
XM\_024452180.1 XM\_021837417.1  
XM\_024452231.1 XM\_021842176.1  
XM\_024452232.1 XM\_021856570.1  
XM\_024452268.1 XM\_021855940.1  
XM\_024452292.1 XM\_021839139.1  
XM\_024452296.1 XM\_021854131.1  
XM\_024452311.1 XM\_021848727.1  
XM\_024452349.1 XM\_001654166.2  
XM\_024452370.1 XM\_001648857.2  
XM\_024452372.1 XM\_021842172.1  
XM\_024452376.1 XM\_001659500.2  
XM\_024452391.1 XM\_021842143.1  
XM\_024452439.1 XM\_021848715.1  
XM\_024452448.1 XM\_021837458.1  
XM\_024452465.1 XM\_021853638.1  
XM\_024452470.1 XM\_021855956.1  
XM\_024452483.1 XM\_021841211.1  
XM\_024452494.1 XR\_002502616.1  
XM\_024452531.1 XR\_002500458.1

XM\_024452578.1 XR\_002503109.1  
XM\_024452662.1 XM\_001648856.2  
XM\_024452683.1 XM\_021849194.1  
XM\_024452703.1 XR\_002499223.1  
XM\_024452713.1 XM\_021848714.1  
XM\_024452715.1 XM\_021842322.1  
XM\_024452723.1 XM\_021848944.1  
XM\_024452733.1 XM\_021840648.1  
XM\_024452780.1 XM\_001648844.2  
XM\_024452796.1 XM\_021849923.1  
XM\_024452806.1 XM\_021854449.1  
XM\_024452807.1 XM\_021853849.1  
XM\_024452824.1 XM\_021844642.1  
XM\_024452832.1 XM\_021837645.1  
XM\_024452866.1 XM\_021849707.1  
XM\_024452898.1 XR\_002501910.1  
XM\_024452926.1 XM\_001656108.2  
XM\_024452942.1 XM\_021852421.1  
XM\_024452965.1 XR\_002502002.1  
XM\_024453032.1 XM\_021840677.1  
XM\_024453050.1 XM\_021838294.1  
XM\_024453052.1 XM\_021853323.1  
XM\_024453056.1 XM\_001660756.2  
XM\_024453080.1 XM\_021839118.1  
XM\_024453089.1 XR\_002499681.1  
XM\_024453106.1 XM\_021847065.1  
XM\_024453109.1 XR\_002499308.1  
XM\_024453160.1 XM\_021848177.1  
XM\_024453184.1 XM\_001647616.2  
XM\_024453193.1 XM\_021857708.1  
XM\_024453196.1 XR\_002499561.1  
XM\_024453213.1 XM\_021854036.1  
XM\_024453257.1 XR\_002501350.1  
XM\_024453265.1 XM\_021854371.1  
XM\_024453303.1 XM\_001650479.2  
XM\_024453308.1 XR\_002500451.1  
XM\_024453316.1 XM\_001649602.3  
XM\_024453319.1 XM\_021851020.1  
XM\_024453342.1 XM\_021851344.1  
XM\_024453365.1 XM\_021853442.1  
XM\_024453380.1 XM\_021850445.1  
XM\_024453396.1 XM\_021855961.1  
XM\_024453429.1 XM\_001654759.2  
XM\_024453437.1 XM\_001661200.3  
XM\_024453438.1 XM\_021837494.1  
XM\_024453445.1 XR\_002502167.1  
XM\_024453451.1 XM\_021839165.1  
XM\_024453460.1 XM\_021851850.1  
XM\_024453471.1 XM\_021841020.1  
XM\_024453490.1 XM\_021848712.1

XM\_024453491.1 XR\_002501575.1  
XM\_024453532.1 XM\_021849965.1  
XM\_024453556.1 XM\_021856698.1  
XM\_024453558.1 XM\_021843133.1  
XM\_024453563.1 XR\_002502917.1  
XM\_024453571.1 XM\_021841023.1  
XM\_024453628.1 XM\_021841271.1  
XM\_024453654.1 XM\_021846081.1  
XM\_024453656.1 XM\_021848592.1  
XM\_024453659.1 XM\_021847887.1  
XM\_024453667.1 XM\_021843532.1  
XM\_024453672.1 XM\_001648324.2  
XM\_024453676.1 XM\_021838279.1  
XM\_024453682.1 XM\_021842158.1  
XM\_024453694.1 XM\_021852793.1  
XM\_024453708.1 XM\_001662393.2  
XM\_024453737.1 XM\_021845126.1  
XM\_024453747.1 XM\_021847888.1  
XM\_024453767.1 XM\_001654157.2  
XM\_024453775.1 XR\_002501346.1  
XM\_024453783.1 XM\_021851524.1  
XM\_024453793.1 XM\_021842215.1  
XM\_024453796.1 XM\_001658334.2  
XM\_024453838.1 XM\_001661778.2  
XM\_024453839.1 XR\_002501457.1  
XM\_024453908.1 XM\_001649171.2  
XM\_024453911.1 XR\_002502836.1  
XM\_024453945.1 XM\_021856939.1  
XM\_024454028.1 XM\_001655122.2  
XM\_024454036.1 XM\_021846803.1  
XM\_024454069.1 XM\_021852730.1  
XM\_024454118.1 XM\_021849205.1  
XM\_024454142.1 XM\_021855528.1  
XM\_024454166.1 XM\_021853820.1  
XM\_024454167.1 XM\_021855174.1  
XM\_024454170.1 XM\_021843065.1  
XM\_024454186.1 XM\_001647924.3  
XM\_024454206.1 XM\_001662645.2  
XM\_024454207.1 XM\_021855027.1  
XM\_024454208.1 XM\_021851281.1  
XM\_024454218.1 XM\_021855966.1  
XM\_024454227.1 XM\_001653950.2  
XM\_024454246.1 XM\_021838482.1  
XM\_024454251.1 XM\_001651793.2  
XM\_024454267.1 XM\_001659328.3  
XM\_024454269.1 XM\_021842483.1  
XM\_024454277.1 XM\_021845426.1  
XM\_024454319.1 XM\_021855607.1  
XM\_024454328.1 XM\_021855203.1  
XM\_024454368.1 XM\_021857136.1



XM\_024454390.1 XM\_021838480.1  
XM\_037916392.1 XM\_021840699.1  
XR\_001736906.2 XM\_001655205.2  
XR\_001736922.2 XM\_021842008.1  
XR\_001736973.2 XM\_001653836.2  
XR\_001736998.1 XM\_021857023.1  
XR\_001737015.1 XM\_021841134.1  
XR\_001737023.2 XM\_021844867.1  
XR\_001737032.2 XM\_021854580.1  
XR\_001737079.2 XM\_021851518.1  
XR\_001737080.1 XM\_021846689.1  
XR\_001737092.1 XM\_021844000.1  
XR\_001737094.2 XM\_021843130.1  
XR\_001737098.1 XM\_021837479.1  
XR\_001737115.1 XM\_001658740.2  
XR\_001737133.1 XM\_021850446.1  
XR\_001737134.2 XM\_001652485.2  
XR\_001737137.2 XM\_021848075.1  
XR\_001737144.1 XM\_001654205.2  
XR\_001737165.2 XM\_001651767.2  
XR\_001737223.2 XR\_002500885.1  
XR\_001737237.1 XR\_002499031.1  
XR\_001737277.1 XM\_021842698.1  
XR\_001737310.2 XM\_021838617.1  
XR\_001737317.2 XM\_021854361.1  
XR\_001737323.1 XM\_021843734.1  
XR\_001737330.1 XM\_001655383.3  
XR\_001737357.2 XM\_021845232.1  
XR\_001737361.2 XM\_001653284.2  
XR\_001737461.1 XM\_001663957.2  
XR\_001737462.1 XM\_001659455.2  
XR\_001737482.2 XM\_021853091.1  
XR\_001737485.2 XM\_021850471.1  
XR\_001737511.1 XM\_021850390.1  
XR\_001737517.2 XM\_021855701.1  
XR\_001737544.1 XM\_021837659.1  
XR\_001737546.1 XM\_021839874.1  
XR\_001737579.2 XM\_021841210.1  
XR\_001737582.2 XM\_021841360.1  
XR\_001737611.1 XM\_001656178.2  
XR\_001737624.1 XR\_002502786.1  
XR\_001737631.1 XM\_021837412.1  
XR\_001737632.2 XM\_001654758.2  
XR\_001737668.1 XM\_001655067.2  
XR\_001737683.1 XM\_021841021.1  
XR\_001737705.1 XM\_021847126.1  
XR\_001737710.1 XM\_021848462.1  
XR\_001737725.2 XM\_021854614.1  
XR\_001737732.2 XM\_021855858.1  
XR\_001737771.1 XM\_021855605.1

XR\_001737773.1 XR\_002500950.1  
XR\_001737798.1 XM\_021841883.1  
XR\_001737813.1 XR\_002501693.1  
XR\_001737822.1 XM\_001652777.2  
XR\_001737842.1 XM\_001662307.2  
XR\_001737876.1 XM\_021837247.1  
XR\_001737880.1 XM\_021845248.1  
XR\_001737887.1 XM\_001661517.2  
XR\_001737901.1 XM\_001653028.2  
XR\_001737940.1 XM\_021841539.1  
XR\_001737962.1 XM\_021840697.1  
XR\_001737965.1 XM\_021849204.1  
XR\_001738037.2 XM\_001656297.2  
XR\_001738063.1 XM\_021856496.1  
XR\_001738081.1 XM\_021838830.1  
XR\_001738098.1 XM\_021856177.1  
XR\_001738100.1 XR\_002499210.1  
XR\_001738128.1 XM\_021846408.1  
XR\_001738151.2 XR\_002502791.1  
XR\_001738163.1 XM\_021855177.1  
XR\_001738193.1 XR\_002500912.1  
XR\_001738199.1 XM\_021856284.1  
XR\_001738207.1 XM\_021840000.1  
XR\_001738270.1 XM\_001653590.2  
XR\_001738277.2 XM\_001650564.2  
XR\_001738296.1 XM\_021837591.1  
XR\_001738356.1 XM\_021844789.1  
XR\_001738364.1 XM\_021844927.1  
XR\_001738366.1 XM\_021847177.1  
XR\_001738395.1 XR\_002500810.1  
XR\_001738411.1 XM\_001658487.2  
XR\_001738415.1 XM\_021846113.1  
XR\_001738468.1 XM\_021849202.1  
XR\_001738472.1 XM\_021848630.1  
XR\_001738477.1 XM\_001662406.2  
XR\_001738488.1 XM\_021840041.1  
XR\_001738517.1 XR\_002500811.1  
XR\_001738553.1 XR\_002501418.1  
XR\_001738626.2 XM\_021840274.1  
XR\_001738633.1 XM\_021857578.1  
XR\_001738636.2 XM\_021842440.1  
XR\_001738648.1 XM\_001659361.2  
XR\_001738679.1 XM\_021848104.1  
XR\_001738688.2 XM\_021847840.1  
XR\_001738697.1 XM\_021846115.1  
XR\_001738723.1 XR\_002502213.1  
XR\_001738738.1 XR\_002502755.1  
XR\_001738748.1 XM\_001648793.2  
XR\_001738764.1 XM\_021840001.1  
XR\_001738822.1 XM\_021841887.1

XR\_001738850.1 XM\_001660691.2  
XR\_001738864.2 XR\_002500996.1  
XR\_001738871.1 XR\_002498727.1  
XR\_001738899.2 XM\_001653587.2  
XR\_001738927.1 XR\_002502843.1  
XR\_001738961.1 XM\_021854581.1  
XR\_001738970.1 XM\_001651415.2  
XR\_001738979.1 XM\_001650213.2  
XR\_001738989.2 XM\_001651263.2  
XR\_001739020.1 XR\_002502109.1  
XR\_001739021.1 XM\_021852746.1  
XR\_001739055.2 XM\_021847024.1  
XR\_001739066.1 XM\_021848103.1  
XR\_001739068.1 XM\_021843511.1  
XR\_001739090.1 XM\_001650802.2  
XR\_001739093.1 XM\_021838088.1  
XR\_001739109.1 XM\_021849708.1  
XR\_001739117.1 XM\_001654416.2  
XR\_001739134.1 XM\_001661841.3  
XR\_001739169.1 XM\_001652830.2  
XR\_001739177.1 XM\_001650117.2  
XR\_001739197.1 XR\_002500710.1  
XR\_001739201.1 XM\_021842701.1  
XR\_001739250.1 XM\_021842011.1  
XR\_001739266.2 XM\_021852534.1  
XR\_001739285.1 XM\_021840935.1  
XR\_001739298.1 XM\_021852803.1  
XR\_001739304.2 XM\_001649480.2  
XR\_001739354.1 XM\_001658178.2  
XR\_001739359.1 XM\_001651081.2  
XR\_001739377.1 XM\_021852110.1  
XR\_001739414.2 XM\_021837675.1  
XR\_001739418.2 XM\_001660153.2  
XR\_001739422.1 XM\_021848760.1  
XR\_001739445.1 XM\_021853322.1  
XR\_001739496.1 XM\_011494668.2  
XR\_001739519.1 XM\_021850575.1  
XR\_001739530.1 XM\_021849090.1  
XR\_001739556.1 XM\_001663923.2  
XR\_001739566.1 XM\_021855611.1  
XR\_001739576.1 XM\_021850709.1  
XR\_001739636.1 XM\_001650557.2  
XR\_001739660.1 XM\_021844965.1  
XR\_001739664.1 XM\_001656257.2  
XR\_001739695.2 XM\_001662001.2  
XR\_001739716.1 XM\_001655482.2  
XR\_001739755.1 XR\_002501934.1  
XR\_001739778.1 XM\_021855990.1  
XR\_001739815.1 XM\_021857313.1  
XR\_001739823.1 XM\_021852111.1

XR\_001739846.1 XM\_021848968.1  
XR\_001739852.2 XM\_001655054.2  
XR\_001739861.1 XM\_021846732.1  
XR\_001739873.1 XM\_021851024.1  
XR\_001739889.1 XM\_021844696.1  
XR\_001739906.1 XM\_021840074.1  
XR\_001739923.1 XM\_021856270.1  
XR\_001739979.1 XM\_021845424.1  
XR\_001739996.2 XM\_001658557.2  
XR\_001740001.1 XM\_021837465.1  
XR\_001740047.1 XM\_021855360.1  
XR\_001740091.1 XM\_001652331.2  
XR\_001740131.2 XM\_021852741.1  
XR\_001740138.1 XM\_021846101.1  
XR\_001740145.2 XR\_002503113.1  
XR\_001740149.2 XR\_002499890.1  
XR\_001740164.1 XM\_021840250.1  
XR\_001740175.1 XM\_021849888.1  
XR\_001740199.2 XM\_021853324.1  
XR\_001740200.2 XM\_001657415.2  
XR\_001740209.2 XM\_021857327.1  
XR\_001740219.2 XM\_001655620.2  
XR\_001740232.1 XM\_001649022.2  
XR\_001740250.1 XM\_001656353.2  
XR\_001740253.2 XM\_001658614.2  
XR\_001740257.1 XM\_021841541.1  
XR\_001740301.2 XM\_021848465.1  
XR\_001740353.2 XM\_021850425.1  
XR\_001740396.1 XM\_001664252.2  
XR\_001740412.1 XM\_001656773.2  
XR\_001740415.1 XR\_002501003.1  
XR\_001740436.2 XM\_021852494.1  
XR\_001740438.1 XM\_021857026.1  
XR\_001740449.1 XM\_011495358.2  
XR\_001740465.1 XM\_011495055.2  
XR\_001740467.1 XM\_021838668.1  
XR\_001740471.1 XM\_021840381.1  
XR\_001740490.2 XM\_021846461.1  
XR\_001740500.1 XM\_021837597.1  
XR\_001740524.1 XM\_021852207.1  
XR\_001740547.1 XM\_021837510.1  
XR\_001740554.1 XR\_002499424.1  
XR\_001740575.1 XM\_021845528.1  
XR\_001740599.1 XM\_021846397.1  
XR\_001740600.1 XM\_001657105.2  
XR\_001740605.2 XR\_002502480.1  
XR\_001740609.1 XM\_001658500.2  
XR\_001740621.1 XM\_021853869.1  
XR\_001740622.1 XM\_021850632.1  
XR\_001740634.1 XM\_021847129.1

XR\_001740740.1 XM\_001656940.2  
XR\_001740741.1 XR\_002499532.1  
XR\_001740748.2 XM\_021838787.1  
XR\_001740760.2 XM\_021838646.1  
XR\_001740761.1 XM\_001655133.2  
XR\_001740807.1 XM\_021848205.1  
XR\_001740819.1 XM\_001654940.2  
XR\_001740824.1 XM\_021848164.1  
XR\_001740850.2 XM\_021855718.1  
XR\_001740939.1 XR\_002502987.1  
XR\_001740980.1 XM\_021849885.1  
XR\_001741071.1 XM\_021843742.1  
XR\_001741091.2 XR\_002500706.1  
XR\_001741131.2 XM\_021837251.1  
XR\_001741136.1 XM\_021838301.1  
XR\_001741146.2 XM\_021851672.1  
XR\_001741185.1 XM\_021854459.1  
XR\_001741218.1 XM\_001649227.2  
XR\_001741272.2 XM\_021839865.1  
XR\_001741277.1 XM\_021856697.1  
XR\_001741285.2 XM\_001657281.2  
XR\_001741289.1 XM\_021855997.1  
XR\_001741311.2 XM\_021844157.1  
XR\_001741374.1 XR\_002499137.1  
XR\_001741421.1 XM\_021846066.1  
XR\_001741425.2 XM\_001656915.2  
XR\_001741432.1 XR\_002501046.1  
XR\_001741437.1 XM\_001651884.2  
XR\_001741438.1 XM\_021846462.1  
XR\_001741444.2 XM\_021848988.1  
XR\_001741503.1 XM\_021851203.1  
XR\_001741530.1 XM\_021849971.1  
XR\_001741616.1 XM\_021841272.1  
XR\_001741634.2 XM\_021851734.1  
XR\_001741656.1 XM\_021839158.1  
XR\_001741689.1 XR\_002499889.1  
XR\_001741693.2 XM\_021855596.1  
XR\_001741694.1 XM\_021847603.1  
XR\_001741697.1 XR\_002498761.1  
XR\_001741704.1 XM\_021846612.1  
XR\_001741729.1 XM\_021856130.1  
XR\_001741733.1 XM\_021849529.1  
XR\_001741735.1 XM\_001654328.2  
XR\_001741738.1 XM\_021839167.1  
XR\_001741745.2 XM\_021854599.1  
XR\_001741796.1 XM\_021855421.1  
XR\_001741816.1 XM\_021840407.1  
XR\_001741823.2 XM\_021845880.1  
XR\_001741861.1 XM\_021852681.1  
XR\_001741884.2 XR\_002499103.1

XR\_001741885.1 XM\_001651085.2  
XR\_001741907.2 XR\_002502578.1  
XR\_001741914.1 XM\_021849485.1  
XR\_001741920.1 XR\_002501595.1  
XR\_001741929.1 XM\_021855937.1  
XR\_001741933.1 XM\_021850981.1  
XR\_001741943.2 XM\_021849337.1  
XR\_001741949.1 XM\_001657587.2  
XR\_001741972.2 XM\_021856321.1  
XR\_001742013.2 XM\_021853939.1  
XR\_001742017.2 XR\_002499876.1  
XR\_001742018.1 XM\_021840700.1  
XR\_001742021.1 XM\_001657816.2  
XR\_001742039.1 XM\_021856609.1  
XR\_001742067.2 XM\_001652590.2  
XR\_001742172.1 XM\_021847881.1  
XR\_001742177.1 XM\_001654863.2  
XR\_001742212.1 XM\_021855131.1  
XR\_001742346.1 XM\_021843080.1  
XR\_001742390.2 XM\_001655921.2  
XR\_001742407.1 XM\_021857045.1  
XR\_001742420.2 XM\_001648242.2  
XR\_001742426.1 XM\_001648865.2  
XR\_001742431.1 XM\_021846085.1  
XR\_001742448.1 XM\_021846313.1  
XR\_001742489.1 XM\_001649280.2  
XR\_001742523.1 XR\_002501067.1  
XR\_001742562.1 XM\_021838665.1  
XR\_001742570.1 XM\_001653617.2  
XR\_001742578.1 XM\_021856796.1  
XR\_001742597.1 XM\_001663732.2  
XR\_001742607.1 XM\_021854593.1  
XR\_001742616.1 XM\_001655406.2  
XR\_001742674.1 XR\_002503157.1  
XR\_001742688.1 XM\_021853889.1  
XR\_001742709.1 XM\_001653067.2  
XR\_001742725.2 XM\_021840395.1  
XR\_001742804.1 XM\_021847133.1  
XR\_001742807.1 XM\_001653995.2  
XR\_001742811.2 XM\_021838515.1  
XR\_001742822.1 XM\_001649928.2  
XR\_001742867.1 XR\_002500115.1  
XR\_001742868.1 XR\_002498720.1  
XR\_001742905.1 XM\_001650986.2  
XR\_001742913.1 XM\_021846230.1  
XR\_001742931.1 XM\_021853000.1  
XR\_001742941.1 XM\_021853001.1  
XR\_001742945.1 XR\_002499130.1  
XR\_001742960.1 XM\_001664089.2  
XR\_001742987.1 XM\_021847073.1

XR\_001742990.1 XM\_021845657.1  
XR\_001743034.1 XM\_021838074.1  
XR\_001743048.1 XM\_021854245.1  
XR\_001743180.2 XM\_021856071.1  
XR\_001743200.1 XM\_021844926.1  
XR\_001743223.2 XM\_021841827.1  
XR\_001743233.2 XM\_021849840.1  
XR\_001743243.1 XM\_021847594.1  
XR\_001743262.2 XM\_021844915.1  
XR\_001743302.1 XM\_021844618.1  
XR\_001743308.2 XM\_021855145.1  
XR\_001743453.1 XM\_021854841.1  
XR\_001743487.2 XR\_002498632.1  
XR\_001743504.1 XR\_002499274.1  
XR\_001743623.2 XM\_021839295.1  
XR\_001743626.2 XM\_001658271.2  
XR\_001743696.2 XR\_002503120.1  
XR\_001743702.1 XM\_001653720.2  
XR\_001743720.1 XM\_021854442.1  
XR\_001743723.1 XM\_021849804.1  
XR\_001743726.2 XM\_021857631.1  
XR\_001743790.1 XR\_002498824.1  
XR\_001743815.1 XM\_021846459.1  
XR\_001743903.1 XM\_021839103.1  
XR\_001743911.2 XM\_001657699.2  
XR\_001743912.2 XM\_021841911.1  
XR\_001743913.1 XR\_002498584.1  
XR\_001743918.1 XM\_001663070.2  
XR\_001743956.1 XM\_021844916.1  
XR\_001743981.1 XM\_021845422.1  
XR\_001743990.1 XR\_002502919.1  
XR\_001744027.1 XM\_001658879.2  
XR\_001744091.1 XM\_021852559.1  
XR\_001744099.1 XM\_001653305.2  
XR\_001744157.1 XM\_021849288.1  
XR\_001744160.1 XR\_002501101.1  
XR\_001744190.1 XM\_001648078.3  
XR\_001744216.2 XM\_021854551.1  
XR\_001744257.1 XM\_021846918.1  
XR\_001744333.1 XM\_021844920.1  
XR\_001744360.2 XM\_021851517.1  
XR\_001744374.1 XM\_021854489.1  
XR\_001744391.1 XM\_001663754.2  
XR\_001744393.1 XM\_021841876.1  
XR\_001744397.2 XM\_021838692.1  
XR\_001744408.1 XM\_021838815.1  
XR\_001744418.1 XR\_002500460.1  
XR\_001744431.1 XM\_021837453.1  
XR\_001744446.1 XM\_001659468.2  
XR\_001744482.1 XM\_001653619.2

XR\_001744514.1 XM\_021854639.1  
XR\_001744601.2 XR\_002499676.1  
XR\_001744694.1 XM\_021842749.1  
XR\_001744731.2 XM\_021856619.1  
XR\_001744750.1 XM\_001661607.2  
XR\_001744811.1 XM\_021852634.1  
XR\_001744812.1 XM\_021837524.1  
XR\_001744823.1 XM\_021853776.1  
XR\_001744840.1 XM\_021839166.1  
XR\_001744887.2 XR\_002501263.1  
XR\_001744889.2 XM\_001664080.2  
XR\_001744898.2 XM\_021846456.1  
XR\_001744903.2 XM\_021838502.1  
XR\_001744938.1 XM\_001653057.2  
XR\_001744943.2 XM\_021851883.1  
XR\_001745010.1 XM\_021842262.1  
XR\_001745019.1 XM\_021851882.1  
XR\_001745068.1 XM\_021837403.1  
XR\_001745070.2 XM\_021854842.1  
XR\_001745074.1 XM\_021847598.1  
XR\_001745083.2 XM\_021855242.1  
XR\_001745090.1 XM\_021843594.1  
XR\_001745096.1 XR\_002499891.1  
XR\_001745183.1 XM\_021838664.1  
XR\_001745186.1 XM\_021840514.1  
XR\_001745257.1 XR\_002499102.1  
XR\_001745273.1 XR\_002502033.1  
XR\_001745332.1 XM\_021837681.1  
XR\_001745352.1 XM\_021849522.1  
XR\_001745364.1 XM\_001651043.2  
XR\_001745380.1 XM\_001663668.3  
XR\_001745384.1 XM\_021847644.1  
XR\_001745422.1 XM\_021847345.1  
XR\_001745496.1 XR\_002502808.1  
XR\_001745506.2 XM\_021838820.1  
XR\_001745508.2 XM\_001661622.2  
XR\_001745533.1 XM\_021838349.1  
XR\_001745554.2 XM\_021854281.1  
XR\_001745582.1 XM\_001657219.2  
XR\_001745593.1 XM\_021849605.1  
XR\_001745611.2 XM\_021856608.1  
XR\_001745613.2 XM\_001662007.2  
XR\_001745629.2 XM\_001657181.2  
XR\_001745651.2 XM\_001654198.2  
XR\_001745657.1 XM\_001657837.2  
XR\_001745684.1 XM\_021838434.1  
XR\_001745705.1 XM\_021856968.1  
XR\_001745709.1 XM\_021849878.1  
XR\_001745769.1 XM\_021849706.1  
XR\_001745779.1 XR\_002501251.1



XR\_001745885.1 XM\_021857099.1  
XR\_001745914.1 XM\_001653056.2  
XR\_001745965.1 XM\_021837715.1  
XR\_001745973.1 XR\_002500503.1  
XR\_001746017.1 XM\_021845167.1  
XR\_001746060.1 XM\_021852720.1  
XR\_001746092.2 XM\_021842007.1  
XR\_001746128.1 XM\_001658518.2  
XR\_001746129.1 XM\_021853426.1  
XR\_001746150.2 XM\_021844029.1  
XR\_001746162.2 XM\_001649859.2  
XR\_001746166.2 XM\_021856879.1  
XR\_001746272.1 XM\_021846237.1  
XR\_001746310.2 XM\_021855610.1  
XR\_001746329.2 XM\_021838957.1  
XR\_001746345.1 XM\_021852871.1  
XR\_001746417.2 XM\_021838549.1  
XR\_001746431.1 XR\_002502560.1  
XR\_001746459.1 XM\_021844963.1  
XR\_001746478.2 XM\_021840631.1  
XR\_001746499.1 XM\_021837641.1  
XR\_001746540.2 XR\_002502292.1  
XR\_001746542.2 XM\_021851322.1  
XR\_001746556.2 XM\_021849735.1  
XR\_001746565.1 XM\_021855343.1  
XR\_001746574.1 XR\_002502432.1  
XR\_001746577.1 XR\_002501324.1  
XR\_001746613.2 XM\_021838081.1  
XR\_001746656.1 XR\_002502639.1  
XR\_001746667.1 XM\_021840307.1  
XR\_001746681.1 XR\_002502677.1  
XR\_001746684.2 XM\_001653729.2  
XR\_001746690.1 XM\_021844922.1  
XR\_001746718.1 XM\_021838538.1  
XR\_001746727.1 XM\_021837761.1  
XR\_001746756.1 XM\_021840633.1  
XR\_001746760.1 XM\_001661354.2  
XR\_001746839.1 XM\_001659222.2  
XR\_001746844.1 XM\_021857618.1  
XR\_001746887.1 XM\_001651280.3  
XR\_001746907.1 XM\_021846685.1  
XR\_001746914.1 XM\_001655423.2  
XR\_001746931.1 XM\_001653857.2  
XR\_001746932.1 XM\_021848901.1  
XR\_001746934.1 XM\_021847601.1  
XR\_001746963.1 XM\_001661839.2  
XR\_001746986.1 XM\_021857574.1  
XR\_001747015.1 XM\_021853384.1  
XR\_001747016.1 XM\_001657776.2  
XR\_001747096.1 XM\_021845554.1

XR\_001747123.2 XM\_021838289.1  
XR\_001747173.1 XM\_021845709.1  
XR\_001747197.2 XM\_021845660.1  
XR\_001747218.1 XM\_021855405.1  
XR\_001747221.1 XM\_001648407.2  
XR\_001747223.1 XM\_021839321.1  
XR\_001747227.1 XM\_021845359.1  
XR\_001747229.1 XM\_021837722.1  
XR\_001747250.1 XM\_021839749.1  
XR\_001747275.1 XM\_021838359.1  
XR\_001747280.1 XR\_002499186.1  
XR\_001747282.1 XM\_021845653.1  
XR\_001747293.1 XM\_021841843.1  
XR\_001747319.2 XR\_002502051.1  
XR\_001747335.1 XR\_002501966.1  
XR\_001747343.1 XM\_021846524.1  
XR\_001747348.1 XM\_021840571.1  
XR\_001747359.1 XM\_021849520.1  
XR\_001747385.2 XM\_021839723.1  
XR\_001747416.1 XM\_021840559.1  
XR\_001747428.1 XM\_021843073.1  
XR\_001747431.1 XM\_021849594.1  
XR\_001747434.1 XM\_021849853.1  
XR\_001747479.1 XM\_021837569.1  
XR\_001747484.2 XM\_001648240.2  
XR\_001747488.2 XM\_021839169.1  
XR\_001747494.1 XM\_021843135.1  
XR\_001747560.2 XM\_021840394.1  
XR\_001747561.1 XM\_021837568.1  
XR\_001747568.1 XM\_021855126.1  
XR\_001747602.1 XM\_021840173.1  
XR\_001747603.1 XM\_021844593.1  
XR\_001747616.1 XM\_021851670.1  
XR\_001747657.1 XM\_021855322.1  
XR\_001747753.1 XR\_002502697.1  
XR\_001747852.1 XR\_002501339.1  
XR\_001747896.1 XM\_021847616.1  
XR\_001747911.2 XR\_002498716.1  
XR\_001747931.1 XM\_001653685.2  
XR\_001747949.2 XR\_002499313.1  
XR\_001747953.2 XM\_001650619.2  
XR\_001748011.2 XM\_001649738.2  
XR\_001748053.2 XM\_021842750.1  
XR\_001748059.1 XR\_002499249.1  
XR\_001748066.1 XM\_021851395.1  
XR\_001748072.1 XR\_002498753.1  
XR\_001748092.1 XM\_021855530.1  
XR\_001748099.2 XM\_021846404.1  
XR\_001748108.2 XM\_021848074.1  
XR\_001748163.1 XM\_001648605.2

XR\_001748164.1 XM\_021855792.1  
XR\_001748167.1 XM\_021837560.1  
XR\_001748204.2 XM\_021842703.1  
XR\_001748227.1 XM\_001651988.2  
XR\_001748242.1 XM\_021840608.1  
XR\_001748254.1 XM\_001652746.2  
XR\_001748279.1 XM\_001652244.2  
XR\_001748294.1 XM\_001651062.2  
XR\_001748325.1 XM\_001659690.2  
XR\_001748327.1 XM\_021838496.1  
XR\_001748341.1 XM\_001648918.2  
XR\_001748349.1 XR\_002502658.1  
XR\_001748376.1 XR\_002502265.1  
XR\_001748382.1 XM\_001662090.2  
XR\_001748384.1 XM\_021842275.1  
XR\_001748400.1 XM\_021841130.1  
XR\_001748439.1 XM\_021842857.1  
XR\_001748456.1 XM\_021837249.1  
XR\_001748469.1 XM\_021841374.1  
XR\_001748486.1 XM\_001661748.2  
XR\_001748580.2 XM\_021849017.1  
XR\_001748606.2 XM\_001649842.2  
XR\_001748628.1 XR\_002499639.1  
XR\_001748691.1 XM\_001649915.2  
XR\_001748700.2 XM\_021845656.1  
XR\_001748726.2 XM\_001658911.2  
XR\_001748728.1 XM\_021851043.1  
XR\_001748820.1 XR\_002498862.1  
XR\_001748839.1 XR\_002502642.1  
XR\_001748843.1 XR\_002498776.1  
XR\_001748866.2 XM\_021841869.1  
XR\_001748897.2 XM\_021848850.1  
XR\_001748898.2 XM\_021842261.1  
XR\_001748905.2 XM\_001656746.2  
XR\_001748933.2 XM\_001649460.2  
XR\_001748946.1 XM\_021857712.1  
XR\_001749033.1 XR\_002500673.1  
XR\_001749039.1 XM\_001661822.2  
XR\_001749071.1 XM\_021854894.1  
XR\_001749095.1 XM\_021847111.1  
XR\_001749102.1 XM\_001655763.2  
XR\_001749108.1 XR\_002502710.1  
XR\_001749114.1 XM\_021837599.1  
XR\_001749127.2 XM\_021840678.1  
XR\_001749131.1 XR\_002498707.1  
XR\_001749146.1 XM\_001655511.2  
XR\_001749251.1 XM\_001658844.2  
XR\_001749260.1 XM\_021837603.1  
XR\_001749305.1 XM\_001656499.2  
XR\_001749346.2 XM\_021851866.1

XR\_001749378.1 XR\_002499743.1  
XR\_001749394.1 XR\_002501924.1  
XR\_001749430.1 XM\_021840007.1  
XR\_001749585.2 XM\_021846000.1  
XR\_001749614.2 XM\_021845987.1  
XR\_001749668.2 XM\_021839018.1  
XR\_001749717.2 XM\_021838497.1  
XR\_001749854.1 XM\_021843961.1  
XR\_001749883.1 XM\_001650170.2  
XR\_001749924.1 XM\_001655193.2  
XR\_001749952.1 XM\_021840172.1  
XR\_001749996.1 XM\_001653421.2  
XR\_001750001.1 XM\_021852801.1  
XR\_001750008.1 XM\_021851982.1  
XR\_001750018.1 XM\_021844249.1  
XR\_001750024.1 XM\_001663866.2  
XR\_001750181.2 XM\_001656713.2  
XR\_001750279.1 XM\_001650151.2  
XR\_001750360.1 XM\_021843171.1  
XR\_001750400.1 XM\_001657313.2  
XR\_001750415.1 XM\_021845812.1  
XR\_001750478.2 XM\_001658363.2  
XR\_001750482.1 XM\_001664001.2  
XR\_001750510.2 XM\_021852496.1  
XR\_001750605.1 XM\_001657576.3  
XR\_001750621.1 XM\_021838220.1  
XR\_001750626.1 XM\_021846476.1  
XR\_001750673.1 XM\_021852280.1  
XR\_001750696.1 XM\_021841871.1  
XR\_001750733.1 XM\_001657695.2  
XR\_001750736.1 XM\_021852160.1  
XR\_001750758.1 XM\_021851039.1  
XR\_001750759.1 XM\_021853423.1  
XR\_001750777.1 XR\_002499229.1  
XR\_001750780.1 XM\_001652399.2  
XR\_001750788.2 XM\_001648473.2  
XR\_001750796.1 XM\_001649528.2  
XR\_001750818.2 XR\_002499690.1  
XR\_001750836.2 XM\_021839698.1  
XR\_001750866.1 XM\_001661405.2  
XR\_001750871.2 XR\_002501568.1  
XR\_001750891.1 XM\_001656024.2  
XR\_001750945.1 XM\_021838077.1  
XR\_001750963.1 XM\_021849482.1  
XR\_001751016.1 XM\_001657056.2  
XR\_001751081.1 XM\_021848317.1  
XR\_001751098.2 XM\_001651845.2  
XR\_001751142.1 XR\_002499095.1  
XR\_001751181.1 XM\_001660686.2  
XR\_001751221.2 XM\_021837276.1

XR\_001751298.2 XR\_002501921.1  
XR\_001751311.1 XM\_001653987.2  
XR\_001751318.1 XM\_021837248.1  
XR\_001751319.2 XM\_001650112.2  
XR\_001751333.2 XR\_002503240.1  
XR\_001751379.2 XM\_021855323.1  
XR\_001751381.1 XM\_021849859.1  
XR\_001751400.1 XM\_001658617.2  
XR\_001751523.1 XM\_021843061.1  
XR\_001751554.2 XM\_001662359.2  
XR\_001751587.1 XR\_002499691.1  
XR\_001751594.1 XM\_021855124.1  
XR\_001751607.1 XM\_021856020.1  
XR\_001751613.2 XM\_021841377.1  
XR\_001751636.1 XM\_021840044.1  
XR\_001751683.1 XR\_002502528.1  
XR\_001751694.1 XM\_001652146.2  
XR\_001751696.1 XM\_021847813.1  
XR\_001751763.2 XM\_021839867.1  
XR\_001751767.2 XM\_021845457.1  
XR\_001751795.1 XM\_001663283.2  
XR\_001751806.1 XM\_021849470.1  
XR\_001751818.2 XM\_021853048.1  
XR\_001751827.2 XM\_021851548.1  
XR\_001751838.1 XM\_021848836.1  
XR\_001751881.2 XM\_021851929.1  
XR\_001751886.1 XM\_021841216.1  
XR\_001751895.1 XM\_001654936.2  
XR\_001751907.2 XR\_002501125.1  
XR\_001751939.1 XM\_021837333.1  
XR\_001751942.1 XR\_002502170.1  
XR\_001751948.1 XM\_021845055.1  
XR\_001751996.1 XM\_021838670.1  
XR\_001752064.1 XM\_021838293.1  
XR\_001752066.1 XM\_021845458.1  
XR\_001752082.1 XR\_002501154.1  
XR\_001752085.2 XR\_002502925.1  
XR\_001752103.1 XM\_021841923.1  
XR\_001752119.2 XM\_021838941.1  
XR\_001752179.1 XM\_021845950.1  
XR\_001752213.1 XM\_001653993.2  
XR\_001752214.1 XM\_021840775.1  
XR\_001752219.1 XM\_021843129.1  
XR\_001752224.1 XM\_001655478.2  
XR\_001752225.1 XM\_021839218.1  
XR\_001752227.1 XM\_021855150.1  
XR\_001752232.1 XM\_001652057.2  
XR\_001752236.1 XM\_021849546.1  
XR\_001752238.1 XM\_021841441.1  
XR\_001752250.1 XM\_001662421.2

XR\_001752271.2 XM\_001653580.2  
XR\_001752336.1 XM\_001663378.2  
XR\_001752359.1 XM\_021840077.1  
XR\_001752394.2 XM\_021851232.1  
XR\_001752486.2 XM\_021845936.1  
XR\_001752487.1 XM\_001661586.2  
XR\_001752495.1 XM\_021854594.1  
XR\_001752509.2 XM\_021856345.1  
XR\_001752529.1 XM\_021853301.1  
XR\_001752545.1 XM\_001653777.2  
XR\_001752558.1 XM\_021857639.1  
XR\_001752594.1 XM\_021838276.1  
XR\_001752604.2 XM\_021839618.1  
XR\_001752626.2 XM\_021849457.1  
XR\_001752661.2 XM\_021854173.1  
XR\_001752664.1 XM\_021853276.1  
XR\_001752677.2 XM\_021846450.1  
XR\_001752679.1 XM\_001652704.2  
XR\_001752687.2 XM\_001654156.2  
XR\_001752688.2 XR\_002502805.1  
XR\_001752722.2 XM\_001659083.3  
XR\_001752740.1 XM\_021838292.1  
XR\_001752749.1 XM\_021838204.1  
XR\_001752814.2 XM\_021854587.1  
XR\_001752868.1 XM\_001651800.2  
XR\_001752870.1 XM\_021845879.1  
XR\_001752882.2 XR\_002502104.1  
XR\_001752918.2 XM\_021851044.1  
XR\_001752972.2 XM\_021841080.1  
XR\_001752980.2 XM\_021842479.1  
XR\_001752996.1 XM\_021857634.1  
XR\_001753013.2 XM\_021844658.1  
XR\_001753025.1 XM\_021847285.1  
XR\_001753096.1 XM\_021854641.1  
XR\_001753115.2 XM\_021854907.1  
XR\_001753127.1 XM\_001657779.2  
XR\_001753138.1 XM\_001648520.2  
XR\_001753166.1 XM\_021846830.1  
XR\_001753189.1 XM\_021851252.1  
XR\_001753260.2 XM\_001660368.2  
XR\_001753324.1 XM\_021856864.1  
XR\_001753345.1 XM\_021841446.1  
XR\_001753371.1 XR\_002500262.1  
XR\_001753374.1 XM\_021838688.1  
XR\_001753375.1 XM\_001658390.2  
XR\_001753379.2 XM\_021848076.1  
XR\_001753382.1 XM\_001659049.2  
XR\_001753404.1 XM\_001663952.2  
XR\_001753412.1 XM\_021853419.1  
XR\_001753427.1 XR\_002502289.1

XR\_001753435.1 XR\_002501325.1  
XR\_001753442.1 XR\_002499754.1  
XR\_001753467.1 XM\_021850024.1  
XR\_001753495.1 XM\_001664123.2  
XR\_001753503.1 XM\_021849712.1  
XR\_001753542.1 XM\_001658796.2  
XR\_001753549.1 XM\_001653334.2  
XR\_001753552.1 XM\_021856419.1  
XR\_001753553.1 XM\_021851248.1  
XR\_001753567.2 XR\_002501806.1  
XR\_001753614.2 XM\_021842799.1  
XR\_001753642.1 XM\_021854813.1  
XR\_001753661.1 XM\_001652895.2  
XR\_001753662.1 XM\_021839296.1  
XR\_001753663.2 XM\_021843955.1  
XR\_001753665.2 XM\_001654611.2  
XR\_001753675.1 XM\_021856709.1  
XR\_001753702.1 XR\_002500636.1  
XR\_001753751.1 XM\_021838191.1  
XR\_001753840.1 XM\_021839122.1  
XR\_001753866.1 XM\_001650584.2  
XR\_001753920.1 XM\_021848860.1  
XR\_001753961.1 XM\_021854589.1  
XR\_001754017.1 XR\_002500298.1  
XR\_001754024.1 XM\_021846688.1  
XR\_001754058.1 XR\_002501352.1  
XR\_001754062.1 XM\_001647564.2  
XR\_001754077.1 XM\_021855348.1  
XR\_001754085.1 XM\_001652775.2  
XR\_001754187.1 XM\_021855340.1  
XR\_001754252.1 XM\_001659833.2  
XR\_001754294.1 XR\_002501145.1  
XR\_001754324.1 XR\_002502552.1  
XR\_001754379.1 XM\_021840008.1  
XR\_001754412.1 XM\_001656887.2  
XR\_001754443.2 XM\_021838704.1  
XR\_001754491.1 XR\_002500724.1  
XR\_001754493.1 XM\_001648259.2  
XR\_001754526.1 XR\_002501258.1  
XR\_001754532.1 XM\_001653646.2  
XR\_001754556.2 XM\_021850663.1  
XR\_001754560.1 XM\_021852341.1  
XR\_001754596.1 XM\_001649218.2  
XR\_001754618.1 XM\_001654203.2  
XR\_001754623.1 XM\_001652058.2  
XR\_001754634.2 XM\_001663791.2  
XR\_001754691.1 XM\_021838035.1  
XR\_001754738.1 XM\_001660118.2  
XR\_001754902.2 XM\_021856282.1  
XR\_001754920.2 XM\_001662816.2

XR\_001754963.2 XM\_021851250.1  
XR\_001754973.1 XM\_021851389.1  
XR\_001754982.1 XM\_021840312.1  
XR\_001754983.1 XM\_001652166.2  
XR\_001754994.1 XM\_001648785.2  
XR\_001754995.1 XM\_021854272.1  
XR\_001755040.1 XR\_002501072.1  
XR\_001755082.2 XM\_001655379.2  
XR\_001755190.1 XM\_021839846.1  
XR\_001755232.1 XM\_021844962.1  
XR\_001755233.1 XM\_021841010.1  
XR\_001755416.2 XM\_021854591.1  
XR\_001755441.1 XM\_001658930.2  
XR\_001755448.1 XM\_021846841.1  
XR\_001755452.1 XM\_021843422.1  
XR\_001755457.1 XR\_002501890.1  
XR\_001755490.1 XM\_021853766.1  
XR\_001755513.1 XM\_021838314.1  
XR\_001755552.2 XM\_021847431.1  
XR\_001755623.1 XM\_021843184.1  
XR\_001755679.1 XM\_001656397.2  
XR\_001755707.2 XM\_001647970.2  
XR\_001755714.1 XR\_002499765.1  
XR\_001755718.2 XM\_021852356.1  
XR\_001755743.1 XM\_001662860.2  
XR\_001755765.1 XM\_021848391.1  
XR\_001755783.1 XR\_002500543.1  
XR\_001755784.1 XM\_021837716.1  
XR\_001755790.1 XM\_001654927.2  
XR\_001755798.1 XM\_001649552.2  
XR\_001755858.1 XM\_021851921.1  
XR\_001755861.2 XM\_001663674.2  
XR\_001755870.1 XM\_021855274.1  
XR\_001755898.1 XM\_021849685.1  
XR\_001755913.1 XM\_021847057.1  
XR\_001755922.1 XR\_002503165.1  
XR\_001755939.1 XM\_021856389.1  
XR\_001755967.1 XR\_002501045.1  
XR\_001755969.1 XM\_021843066.1  
XR\_001756037.1 XM\_021851689.1  
XR\_001756056.1 XM\_021841603.1  
XR\_001756065.1 XR\_002500691.1  
XR\_001756077.1 XM\_021855871.1  
XR\_001756087.2 XM\_021852641.1  
XR\_001756115.1 XR\_002499688.1  
XR\_001756128.1 XR\_002499519.1  
XR\_001756135.1 XM\_021854586.1  
XR\_001756158.2 XM\_001653835.2  
XR\_001756170.1 XM\_021847058.1  
XR\_001756188.1 XM\_001662525.2



|                |                |
|----------------|----------------|
| XR_001756224.1 | XM_021848079.1 |
| XR_001756227.1 | XM_021851393.1 |
| XR_001756308.1 | XM_021842082.1 |
| XR_001756322.1 | XM_021851919.1 |
| XR_001756339.1 | XR_002502509.1 |
| XR_001756347.1 | XM_021838076.1 |
| XR_001756355.1 | XM_021853278.1 |
| XR_001756371.1 | XM_001662111.2 |
| XR_001756382.1 | XM_001650810.2 |
| XR_001756402.1 | XR_002500995.1 |
| XR_001756421.2 | XM_001656052.2 |
| XR_001756422.2 | XR_002499272.1 |
| XR_001756455.1 | XM_021849262.1 |
| XR_001756475.1 | XR_002498786.1 |
| XR_001756486.1 | XR_002501643.1 |
| XR_001756499.1 | XM_021842654.1 |
| XR_001756508.1 | XM_001650795.2 |
| XR_001756514.1 | XM_001660548.2 |
| XR_001756529.2 | XR_002502082.1 |
| XR_001756547.2 | XR_002498947.1 |
| XR_001756560.1 | XM_021841995.1 |
| XR_001756600.2 | XM_001648849.2 |
| XR_001756614.1 | XM_001654721.2 |
| XR_001756617.1 | XM_021845553.1 |
| XR_001756628.1 | XM_021852467.1 |
| XR_001756639.1 | XM_021845529.1 |
| XR_001756649.1 | XR_002498734.1 |
| XR_001756671.1 | XM_021841957.1 |
| XR_001756770.1 | XM_021844237.1 |
| XR_001756782.2 | XM_021853280.1 |
| XR_001756882.1 | XM_021856319.1 |
| XR_001756883.1 | XM_021843998.1 |
| XR_001756888.2 | XM_021840033.1 |
| XR_001756895.1 | XM_001660603.2 |
| XR_001756897.1 | XM_021846821.1 |
| XR_001756940.1 | XM_021855349.1 |
| XR_001756948.2 | XM_001652105.2 |
| XR_002956186.1 | XM_001663505.2 |
| XR_002956193.1 | XR_002501540.1 |
| XR_002956238.1 | XM_021853277.1 |
| XR_002956299.1 | XR_002499282.1 |
| XR_002956316.1 | XR_002501127.1 |
| XR_002956323.1 | XM_021850438.1 |
| XR_002956327.1 | XM_021855551.1 |
| XR_002956329.1 | XM_021853846.1 |
| XR_002956330.1 | XM_001648602.2 |
| XR_002956338.1 | XM_021840030.1 |
| XR_002956359.1 | XM_001648550.2 |
| XR_002956360.1 | XM_001662491.2 |
| XR_002956377.1 | XM_021838588.1 |

XR\_002956385.1 XM\_001653222.2  
XR\_002956402.1 XM\_001651521.2  
XR\_002956419.1 XR\_002499040.1  
XR\_002956438.1 XM\_021857575.1  
XR\_002956472.1 XR\_002499584.1  
XR\_002956484.1 XR\_002502962.1  
XR\_002956516.1 XR\_002500919.1  
XR\_002956522.1 XM\_001655733.2  
XR\_002956528.1 XM\_001660347.2  
XR\_002956556.1 XM\_021839219.1  
XR\_002956570.1 XR\_002500808.1  
XR\_002956581.1 XM\_021838465.1  
XR\_002956587.1 XM\_021852166.1  
XR\_002956616.1 XM\_021849421.1  
XR\_002956645.1 XM\_001651177.2  
XR\_002956648.1 XM\_021856055.1  
XR\_002956664.1 XR\_002501390.1  
XR\_002956710.1 XR\_002499721.1  
XR\_002956719.1 XM\_001650281.2  
XR\_002956749.1 XM\_021850844.1  
XR\_002956759.1 XM\_021839533.1  
XR\_002956775.1 XM\_001654282.2  
XR\_002956808.1 XM\_021846614.1  
XR\_002956817.1 XM\_011494789.2  
XR\_002956845.1 XM\_011495041.2  
XR\_002956869.1 XM\_021855920.1  
XR\_002956908.1 XR\_002500725.1  
XR\_002956924.1 XM\_011494996.2  
XR\_002956954.1 XM\_021837422.1  
XR\_002956983.1 XM\_001657428.2  
XR\_002957021.1 XM\_001651388.2  
XR\_002957043.1 XR\_002499127.1  
XR\_002957106.1 XM\_021846903.1  
XR\_002957116.1 XM\_021841771.1  
XR\_002957174.1 XM\_021838487.1  
XR\_002957188.1 XM\_021849419.1  
XR\_002957190.1 XM\_001654857.2  
XR\_002957204.1 XM\_021857409.1  
XR\_002957228.1 XR\_002503176.1  
XR\_002957229.1 XR\_002501522.1  
XR\_002957230.1 XM\_021846901.1  
XR\_002957272.1 XM\_021846717.1  
XR\_002957281.1 XM\_001659513.2  
XR\_002957294.1 XM\_001653636.3  
XR\_002957308.1 XM\_021856981.1  
XR\_002957310.1 XM\_001652993.3  
XR\_002957337.1 XM\_001652133.2  
XR\_002957340.1 XM\_021856567.1  
XR\_002957350.1 XM\_021851083.1  
XR\_002957360.1 XR\_002498782.1

|                |                |
|----------------|----------------|
| XR_002957363.1 | XM_021857404.1 |
| XR_002957384.1 | XM_021842016.1 |
| XR_002957422.1 | XM_021845530.1 |
| XR_002957474.1 | XR_002501179.1 |
| XR_002957476.1 | XM_001658393.2 |
| XR_002957480.1 | XM_021856913.1 |
| XR_002957486.1 | XM_021840615.1 |
| XR_002957489.1 | XM_021850821.1 |
| XR_002957490.1 | XM_021850910.1 |
| XR_002957496.1 | XM_021846843.1 |
| XR_002957501.1 | XM_021845871.1 |
| XR_002957533.1 | XM_021839132.1 |
| XR_002957537.1 | XM_001651270.2 |
| XR_002957577.1 | XM_001655472.2 |
| XR_002957578.1 | XM_021856874.1 |
| XR_002957582.1 | XM_021847729.1 |
| XR_002957618.1 | XM_001648783.2 |
| XR_002957624.1 | XM_001661996.2 |
| XR_002957634.1 | XM_021848080.1 |
| XR_002957679.1 | XM_001655909.2 |
| XR_002957691.1 | XM_021841396.1 |
| XR_002957706.1 | XM_001664212.2 |
| XR_002957746.1 | XM_021856088.1 |
| XR_002957752.1 | XM_001662964.2 |
| XR_002957809.1 | XM_021854695.1 |
| XR_002957853.1 | XM_021841956.1 |
| XR_002957873.1 | XR_002500147.1 |
| XR_002957881.1 | XM_001660006.2 |
| XR_002957885.1 | XR_002501177.1 |
| XR_002957897.1 | XM_001657585.2 |
| XR_002957901.1 | XR_002500213.1 |
| XR_002957911.1 | XM_021841972.1 |
| XR_002957945.1 | XM_021841158.1 |
| XR_002957961.1 | XM_001652048.2 |
| XR_002958000.1 | XM_021857408.1 |
| XR_002958039.1 | XM_001654870.2 |
| XR_002958047.1 | XM_021848057.1 |
| XR_002958065.1 | XM_001654599.2 |
| XR_002958071.1 | XM_021841716.1 |
| XR_002958079.1 | XR_002499096.1 |
| XR_002958082.1 | XM_021847021.1 |
| XR_002958088.1 | XM_021846120.1 |
| XR_002958091.1 | XR_002499316.1 |
| XR_002958096.1 | XM_001663071.2 |
| XR_002958104.1 | XM_021856370.1 |
| XR_002958114.1 | XM_001657642.2 |
| XR_002958116.1 | XM_001659905.2 |
| XR_002958175.1 | XM_021857434.1 |
| XR_002958176.1 | XM_001651862.2 |
| XR_002958182.1 | XM_001647791.2 |

XR\_002958204.1 XR\_002498981.1  
XR\_002958206.1 XM\_021838020.1  
XR\_002958207.1 XM\_021854873.1  
XR\_002958235.1 XM\_021845404.1  
XR\_002958244.1 XM\_021844503.1  
XR\_002958250.1 XM\_021845263.1  
XR\_002958252.1 XM\_021841393.1  
XR\_002958257.1 XM\_021855163.1  
XR\_002958266.1 XM\_001653633.3  
XR\_002958282.1 XM\_001656339.2  
XR\_002958330.1 XM\_021839649.1  
XR\_002958342.1 XM\_021857253.1  
XR\_002958369.1 XR\_002501651.1  
XR\_002958373.1 XR\_002501828.1  
XR\_002958387.1 XM\_001653915.2  
XR\_002958388.1 XM\_021850511.1  
XR\_002958393.1 XM\_021839787.1  
XR\_002958414.1 XM\_001653989.2  
XR\_002958418.1 XM\_001653884.2  
XR\_002958423.1 XM\_021851690.1  
XR\_002958460.1 XM\_001651993.2  
XR\_002958481.1 XM\_001660592.2  
XR\_002958482.1 XM\_021855083.1  
XR\_002958489.1 XM\_021841936.1  
XR\_002958504.1 XR\_002501364.1  
XR\_002958524.1 XM\_021849150.1  
XR\_002958557.1 XM\_001653765.2  
XR\_002958565.1 XM\_021852894.1  
XR\_002958575.1 XM\_021848198.1  
XR\_002958601.1 XM\_021840088.1  
XR\_002958616.1 XM\_021846015.1  
XR\_002958625.1 XM\_001649482.2  
XR\_002958639.1 XM\_021837328.1  
XR\_002958666.1 XM\_021853132.1  
XR\_002958698.1 XM\_001656531.2  
XR\_002958716.1 XM\_021846315.1  
XR\_002958720.1 XM\_021846139.1  
XR\_002958749.1 XM\_021838278.1  
XR\_002958760.1 XR\_002499504.1  
XR\_002958774.1 XM\_021849051.1  
XR\_002958806.1 XR\_002502818.1  
XR\_002958821.1 XM\_021841994.1  
XR\_002958830.1 XM\_021843222.1  
XR\_002958865.1 XM\_021852638.1  
XR\_002958872.1 XR\_002500583.1  
XR\_002958884.1 XR\_002503206.1  
XR\_002958894.1 XM\_021846138.1  
XR\_002958898.1 XM\_021848338.1  
XR\_002958922.1 XM\_001661763.2  
XR\_002958941.1 XM\_021851733.1

XR\_002958976.1 XM\_021841442.1  
XR\_002959024.1 XM\_021845139.1  
XR\_002959052.1 XM\_001653086.2  
XR\_002959055.1 XM\_001649092.2  
XR\_002959065.1 XM\_021847023.1  
XR\_002959099.1 XM\_021854539.1  
XR\_002959104.1 XR\_002501946.1  
XR\_002959124.1 XM\_021853958.1  
XR\_002959134.1 XM\_021852163.1  
XR\_002959142.1 XR\_002499365.1  
XR\_002959146.1 XM\_021856195.1  
XR\_002959170.1 XM\_021853957.1  
XR\_002959184.1 XM\_001651272.2  
XR\_002959197.1 XM\_021847053.1  
XR\_002959213.1 XR\_002501959.1  
XR\_002959292.1 XM\_001661123.2  
XR\_002959317.1 XR\_002500529.1  
XR\_002959329.1 XM\_021852691.1  
XR\_002959342.1 XM\_021852640.1  
XR\_002959350.1 XR\_002502973.1  
XR\_002959355.1 XR\_002502141.1  
XR\_002959363.1 XM\_001656806.2  
XR\_002959364.1 XM\_021840773.1  
XR\_002959368.1 XM\_001648257.2  
XR\_002959392.1 XM\_021854156.1  
XR\_002959403.1 XR\_002501298.1  
XR\_002959407.1 XM\_001663995.2  
XR\_002959421.1 XM\_021847901.1  
XR\_002959424.1 XM\_001655167.2  
XR\_002959425.1 XM\_001659854.2  
XR\_002959439.1 XM\_021840512.1  
XR\_002959446.1 XM\_021845834.1  
XR\_002959451.1 XM\_001661610.2  
XR\_002959471.1 XM\_001662036.3  
XR\_002959489.1 XR\_002498839.1  
XR\_002959503.1 XM\_021851379.1  
XR\_002959510.1 XR\_002501961.1  
XR\_002959518.1 XM\_021844635.1  
XR\_002959528.1 XM\_001649611.2  
XR\_002959568.1 XM\_021850032.1  
XR\_002959592.1 XM\_021850289.1  
XR\_002959605.1 XM\_021850033.1  
XR\_002959606.1 XM\_021839790.1  
XR\_002959616.1 XM\_021857620.1  
XR\_002959656.1 XM\_021841800.1  
XR\_002959782.1 XM\_021842000.1  
XR\_002959813.1 XM\_001660247.2  
XR\_002959816.1 XM\_021855345.1  
XR\_002959821.1 XM\_021849362.1  
XR\_002959824.1 XR\_002501880.1

|                |                |
|----------------|----------------|
| XR_004643303.1 | XM_001657420.2 |
| XR_004837503.1 | XM_021841740.1 |
| XR_004837528.1 | XM_001649340.2 |
| XR_004837530.1 | XR_002501382.1 |
| XR_004837531.1 | XM_001657174.2 |
| XR_005228010.1 | XM_001649821.2 |
| XR_005228025.1 | XM_021839459.1 |
| XR_158942.3    | XM_001649696.2 |
| XR_171071.2    | XM_001649289.2 |
| XR_241302.2    | XM_021838370.1 |
| XR_241325.1    | XR_002498770.1 |
| XR_241866.3    | XM_001656916.2 |
| XR_241885.2    | XM_021842251.1 |
| XR_242213.1    | XR_002499527.1 |
| XR_242682.4    | XM_021857621.1 |
| XR_242777.3    | XR_002501186.1 |
| XR_242877.4    | XM_021844228.1 |
| XR_242895.4    | XM_001656164.2 |
| XR_243258.3    | XM_021849809.1 |
| XR_243305.3    | XM_001657961.3 |
| XR_243433.3    | XM_021852694.1 |
| XR_243875.3    | XR_002499011.1 |
| XR_244323.3    | XM_021837349.1 |
| XR_244356.3    | XM_021839271.1 |
| XR_244468.4    | XM_021851916.1 |
| XR_244887.5    | XM_021854601.1 |
| XR_244972.3    | XM_021851189.1 |
| XR_245020.3    | XM_021838382.1 |
| XR_245100.1    | XM_001660426.2 |
| XR_245182.3    | XM_001661618.2 |
| XR_245208.3    | XM_021841932.1 |
| XR_245442.5    | XM_001655564.2 |
| XR_245604.3    | XM_001652020.2 |
| XR_245695.2    | XM_001660270.2 |
| XR_245708.4    | XM_021840311.1 |
| XR_245788.2    | XM_001653769.2 |
| XR_246111.5    | XM_011494982.2 |
| XR_246197.2    | XM_001662377.2 |
| XR_246305.4    | XM_001663852.2 |
| XR_426708.3    | XM_021841567.1 |
| XR_426737.3    | XM_021847160.1 |
| XR_426846.4    | XM_021842683.1 |
| XR_426950.2    | XM_001655743.2 |
| XR_427017.3    | XR_002499292.1 |
| XR_427085.3    | XM_001663394.2 |
| XR_427149.4    | XM_021842006.1 |
| XR_427503.4    | XR_002499604.1 |
| XR_427775.3    | XM_021837284.1 |
| XR_427805.2    | XM_001662581.2 |
| XR_427811.3    | XM_021837767.1 |

|             |                |
|-------------|----------------|
| XR_427883.4 | XM_021842692.1 |
| XR_427919.3 | XM_021852695.1 |
| XR_428154.3 | XM_021851375.1 |
| XR_428319.2 | XM_021854530.1 |
| XR_428359.3 | XR_002501471.1 |
| XR_428520.3 | XR_002501174.1 |
| XR_428583.3 | XM_021852693.1 |
| XR_428650.1 | XM_021850340.1 |
| XR_428922.3 | XM_001652562.2 |
| XR_428971.3 | XM_001650364.2 |
| XR_428993.3 | XM_021852692.1 |
| XR_429016.3 | XR_002500197.1 |
| XR_429135.2 | XM_021840167.1 |
| XR_429192.4 | XM_001654226.2 |
| XR_429333.3 | XM_021839123.1 |
| XR_429360.2 | XR_002499401.1 |
| XR_429740.2 | XM_021837348.1 |
| XR_429875.3 | XR_002499327.1 |
| XR_429913.4 | XM_021856824.1 |
| XR_430031.3 | XM_001654740.2 |
| XR_430124.4 | XM_021857119.1 |
| XR_430202.4 | XM_001663079.2 |
| XR_430301.3 | XM_021854447.1 |
| XR_430308.3 | XR_002501367.1 |
| XR_430821.3 | XM_001661894.2 |
| XR_922018.2 | XM_001653349.2 |
| XR_922067.2 | XR_002499689.1 |
| XR_922140.2 | XM_021855030.1 |
| XR_922148.2 | XM_001655168.2 |
| XR_922160.2 | XM_021839345.1 |
| XR_922213.1 | XM_021843206.1 |
| XR_922299.3 | XM_021857057.1 |
| XR_922306.2 | XM_021853150.1 |
| XR_922317.2 | XM_001662129.2 |
| XR_922341.2 | XM_021855869.1 |
| XR_922454.2 | XM_021843516.1 |
| XR_922459.2 | XM_001660098.2 |
| XR_922472.1 | XM_021841159.1 |
| XR_922508.2 | XM_021840861.1 |
| XR_922530.3 | XM_021856867.1 |
| XR_922599.1 | XM_001657368.2 |
| XR_922623.2 | XR_002500355.1 |
| XR_922667.1 | XM_021845165.1 |
| XR_922705.3 | XM_001654193.2 |
| XR_922815.2 | XR_002500044.1 |
| XR_922879.2 | XR_002503081.1 |
| XR_923022.3 | XM_021852688.1 |
| XR_923082.1 | XM_021850176.1 |
| XR_923085.2 | XM_001649937.2 |
| XR_923090.2 | XM_021848155.1 |

|             |                |
|-------------|----------------|
| XR_923105.2 | XR_002500533.1 |
| XR_923108.2 | XM_001648019.2 |
| XR_923125.1 | XM_021852972.1 |
| XR_923137.2 | XM_021851726.1 |
| XR_923142.2 | XM_001653472.2 |
| XR_923144.2 | XM_021848156.1 |
| XR_923175.2 | XM_021841610.1 |
| XR_923250.2 | XM_021854603.1 |
| XR_923288.1 | XM_001648287.2 |
| XR_923296.1 | XM_021856875.1 |
| XR_923388.1 | XM_021857638.1 |
| XR_923505.2 | XM_021845163.1 |
| XR_923509.2 | XM_001647914.2 |
| XR_923527.1 | XM_021854540.1 |
| XR_923591.3 | XM_001656992.2 |
| XR_923624.2 | XM_021849185.1 |
| XR_923747.2 | XM_001654361.2 |
| XR_923757.2 | XM_001660868.2 |
| XR_923855.2 | XM_001659205.2 |
| XR_923914.2 | XM_021852635.1 |
| XR_923916.2 | XM_021852035.1 |
| XR_923917.2 | XM_021838779.1 |
| XR_923954.1 | XR_002501359.1 |
| XR_924046.2 | XM_001654190.2 |
| XR_924073.3 | XR_002499726.1 |
| XR_924097.2 | XM_021846121.1 |
| XR_924162.3 | XM_021854605.1 |
| XR_924191.3 | XM_001656340.2 |
| XR_924256.2 | XR_002499641.1 |
| XR_924302.2 | XM_021851749.1 |
| XR_924434.1 | XM_001655610.2 |
| XR_924555.2 | XM_021839346.1 |
| XR_924563.2 | XM_001659726.2 |
| XR_924578.2 | XM_001662220.2 |
| XR_924807.2 | XM_001652992.3 |
| XR_924819.2 | XM_021837281.1 |
| XR_925034.2 | XM_021840899.1 |
| XR_925064.2 | XM_021853802.1 |
| XR_925198.1 | XM_021838248.1 |
| XR_925203.2 | XM_021839281.1 |
| XR_925257.3 | XM_021840941.1 |
| XR_925305.2 | XM_021842653.1 |
| XR_925402.2 | XM_021846451.1 |
| XR_925515.2 | XM_021848837.1 |
| XR_925530.2 | XM_001658159.2 |
| XR_925579.2 | XR_002499030.1 |
| XR_925644.2 | XM_021842178.1 |
| XR_925714.1 | XM_021847258.1 |
| XR_925762.2 | XM_021855389.1 |
| XR_925792.2 | XR_002499877.1 |



|             |                |
|-------------|----------------|
| XR_925956.3 | XR_002499955.1 |
| XR_926044.1 | XR_002502781.1 |
| XR_926099.2 | XR_002499187.1 |
| XR_926141.2 | XM_021840483.1 |
| XR_926166.2 | XM_001661339.2 |
| XR_926267.2 | XR_002501224.1 |
| XR_926402.2 | XM_021847950.1 |
| XR_926458.2 | XM_021852687.1 |
| XR_926469.2 | XM_021845851.1 |
| XR_926618.1 | XM_021849180.1 |
| XR_926620.2 | XM_021847161.1 |
| XR_926710.1 | XM_011494657.2 |
| XR_926747.2 | XR_002499053.1 |
| XR_926753.2 | XM_001664022.2 |
| XR_926757.2 | XM_021847306.1 |
| XR_926762.2 | XM_001656288.2 |
| XR_926780.2 | XM_001651391.2 |
| XR_926787.2 | XR_002500332.1 |
| XR_926797.2 | XM_021851335.1 |
| XR_926868.1 | XR_002501001.1 |
| XR_926894.2 | XM_021847935.1 |
| XR_926895.2 | XM_021849373.1 |
| XR_926908.2 | XR_002501960.1 |
| XR_926955.2 | XM_001660047.2 |
| XR_926956.2 | XR_002501317.1 |
| XR_927051.2 | XR_002503168.1 |
| XR_927111.2 | XM_001651276.2 |
| XR_927113.2 | XM_001659158.2 |
| XR_927123.2 | XM_001653861.2 |
| XR_927134.2 | XM_021844808.1 |
| XR_927174.2 | XM_021848204.1 |
| XR_927176.3 | XM_021847257.1 |
| XR_927187.2 | XM_021852838.1 |
| XR_927199.2 | XM_021844629.1 |
| XR_927421.1 | XM_021848498.1 |
| XR_927518.1 | XM_021856872.1 |
| XR_927559.2 | XM_001661968.2 |
| XR_927576.1 | XR_002499832.1 |
| XR_927649.2 | XM_001663324.3 |
| XR_927652.1 | XR_002499977.1 |
| XR_927698.2 | XM_021846361.1 |
| XR_927729.2 | XM_021854604.1 |
| XR_927826.3 | XM_021842685.1 |
| XR_927864.2 | XM_021857028.1 |
| XR_927885.2 | XM_001661855.3 |
| XR_927895.2 | XM_001653515.2 |
| XR_927952.3 | XM_001655804.2 |
| XR_927953.3 | XR_002500019.1 |
| XR_928005.2 | XM_021852612.1 |
| XR_928029.2 | XM_021844207.1 |

|             |                |
|-------------|----------------|
| XR_928033.1 | XR_002499394.1 |
| XR_928047.2 | XM_021857400.1 |
| XR_928059.2 | XM_021841458.1 |
| XR_928066.1 | XM_021842687.1 |
| XR_928171.2 | XM_001649862.2 |
| XR_928242.2 | XM_021838753.1 |
| XR_928260.1 | XM_021843514.1 |
| XR_928309.1 | XM_021849178.1 |
| XR_928312.3 | XR_002503104.1 |
| XR_928340.2 | XR_002501594.1 |
| XR_928399.2 | XR_002502702.1 |
| XR_928407.3 | XM_021853153.1 |
| XR_928448.3 | XM_001655922.2 |
| XR_928452.3 | XM_001655381.2 |
| XR_928461.2 | XM_001661509.2 |
| XR_928491.2 | XM_021853010.1 |
| XR_928650.2 | XM_001648333.2 |
| XR_928665.3 | XM_001656591.2 |
| XR_928727.1 | XM_001649855.2 |
| XR_928855.3 | XM_011495222.2 |
| XR_928863.2 | XM_001657117.2 |
| XR_928868.2 | XM_001649044.2 |
| XR_928896.2 | XM_021854492.1 |
| XR_928899.2 | XM_021843686.1 |
| XR_928910.2 | XM_021839646.1 |
| XR_928913.2 | XM_021845640.1 |
| XR_928934.2 | XM_021849179.1 |
| XR_928959.1 | XM_021852255.1 |
| XR_928962.2 | XM_001656888.2 |
| XR_928965.2 | XR_002501761.1 |
| XR_928967.1 | XM_021852686.1 |
| XR_928972.3 | XM_001657191.2 |
| XR_928993.2 | XR_002502624.1 |
| XR_929013.2 | XM_021850637.1 |
| XR_929027.2 | XM_021857213.1 |
| XR_929040.2 | XM_001654336.2 |
| XR_929113.2 | XM_021846123.1 |
| XR_929119.2 | XR_002501891.1 |
| XR_929159.2 | XR_002502776.1 |
| XR_929407.2 | XM_001661708.2 |
| XR_929462.2 | XM_021852841.1 |
| XR_929464.2 | XR_002502168.1 |
| XR_929529.2 | XM_021852170.1 |
| XR_929580.3 | XR_002502936.1 |
| XR_929605.1 | XR_002498614.1 |
| XR_929627.2 | XM_021841375.1 |
| XR_929731.3 | XR_002501144.1 |
| XR_929748.2 | XM_001648676.3 |
| XR_929767.1 | XM_001655083.2 |
| XR_929939.1 | XM_021844960.1 |

|             |                |
|-------------|----------------|
| XR_929945.1 | XM_001652114.2 |
| XR_929976.2 | XM_021843513.1 |
| XR_929983.2 | XR_002502354.1 |
| XR_929985.2 | XR_002500905.1 |
| XR_930039.2 | XM_001662959.2 |
| XR_930050.2 | XR_002502234.1 |
| XR_930068.2 | XM_021853155.1 |
| XR_930102.2 | XM_021845630.1 |
| XR_930133.2 | XR_002499724.1 |
| XR_930187.2 | XR_002502766.1 |
| XR_930195.1 | XM_021855161.1 |
| XR_930304.2 | XM_001661927.2 |
| XR_930345.1 | XM_001655664.2 |
| XR_930391.2 | XM_001655753.2 |
| XR_930393.2 | XM_021837437.1 |
| XR_930428.2 | XR_002499388.1 |
| XR_930469.2 | XR_002499733.1 |
| XR_930472.1 | XR_002501583.1 |
| XR_930475.2 | XM_021851719.1 |
| XR_930476.2 | XM_021856865.1 |
| XR_930488.1 | XM_021837505.1 |
| XR_930538.2 | XM_021857629.1 |
| XR_930542.2 | XM_021852613.1 |
| XR_930560.2 | XR_002499009.1 |
| XR_930564.2 | XM_021857630.1 |
| XR_930583.3 | XR_002500951.1 |
| XR_930643.1 | XM_021854879.1 |
| XR_930729.2 | XM_001657170.2 |
| XR_930755.3 | XR_002501446.1 |
| XR_930765.2 | XR_002500525.1 |
| XR_930828.2 | XM_001662770.3 |
| XR_930832.2 | XM_021857628.1 |
| XR_930903.3 | XR_002502548.1 |
| XR_930914.2 | XM_021851983.1 |
| XR_931009.2 | XM_001649211.2 |
| XR_931022.2 | XM_021845241.1 |
| XR_931118.2 | XM_001658428.3 |
| XR_931165.2 | XR_002501669.1 |
| XR_931178.2 | XM_001656360.2 |
| XR_931214.2 | XM_021845187.1 |
| XR_931241.2 | XR_002498942.1 |
| XR_931262.1 | XR_002500304.1 |
| XR_931351.2 | XR_002500766.1 |
| XR_931422.2 | XR_002501077.1 |
| XR_931448.2 | XM_021842637.1 |
| XR_931522.2 | XR_002503201.1 |
| XR_931541.2 | XM_001651794.2 |
| XR_931557.3 | XM_001654085.2 |
| XR_931568.2 | XM_021840943.1 |
| XR_931573.2 | XR_002498637.1 |

|             |                |
|-------------|----------------|
| XR_931621.2 | XM_001649048.2 |
| XR_931700.1 | XM_021855595.1 |
| XR_931734.2 | XR_002502627.1 |
| XR_931736.2 | XR_002502863.1 |
| XR_931777.1 | XM_021839414.1 |
| XR_931877.2 | XM_021845939.1 |
| XR_931938.2 | XM_021838317.1 |
| XR_931945.2 | XM_001654730.2 |
| XR_931993.2 | XR_002502814.1 |
| XR_932048.2 | XR_002502825.1 |
| XR_932069.3 | XR_002501532.1 |
| XR_932171.2 | XR_002499432.1 |
| XR_932236.2 | XM_001663924.2 |
| XR_932250.2 | XM_001662063.2 |
| XR_932255.3 | XM_011495298.2 |
| XR_932399.2 | XR_002499008.1 |
| XR_932404.3 | XR_002502346.1 |
| XR_932409.2 | XM_001659710.2 |
| XR_932424.2 | XM_021838776.1 |
| XR_932478.1 | XM_021852227.1 |
| XR_932493.2 | XR_002500858.1 |
| XR_932518.2 | XM_021839952.1 |
| XR_932542.2 | XR_002503057.1 |
| XR_932590.1 | XR_002500333.1 |
| XR_932615.3 | XM_021852172.1 |
| XR_932644.2 | XM_021853850.1 |
| XR_932669.2 | XR_002500207.1 |
| XR_932838.3 | XR_002501993.1 |
| XR_932928.3 | XR_002502204.1 |
| XR_933085.2 | XR_002499110.1 |
| XR_933149.3 | XR_002500004.1 |
| XR_933341.3 | XM_001651106.2 |
| XR_933352.2 | XM_001657076.2 |
| XR_933433.3 | XM_001650350.2 |
| XR_933519.2 | XM_001651505.2 |
| XR_933596.2 | XR_002499967.1 |
| XR_933619.3 | XR_002503150.1 |
| XR_933623.2 | XR_002503083.1 |
| XR_933711.2 | XM_001656141.2 |
| XR_933729.3 | XM_001649043.2 |
| XR_933754.2 | XR_002500260.1 |
| XR_933786.2 | XM_021853868.1 |
| XR_934174.2 | XR_002500436.1 |
| XR_934178.2 | XM_001652520.2 |
| XR_934252.2 | XR_002501159.1 |
| XR_934258.2 | XM_021839816.1 |
| XR_934312.3 | XM_001653027.2 |
| XR_934326.2 | XM_021842689.1 |
| XR_934369.1 | XM_001660285.2 |
| XR_934476.3 | XR_002500686.1 |

|             |                |
|-------------|----------------|
| XR_934502.1 | XM_021849451.1 |
| XR_934535.1 | XM_001660437.2 |
| XR_934637.3 | XR_002500623.1 |
| XR_934687.2 | XM_021840900.1 |
| XR_934751.2 | XM_021856689.1 |
| XR_934753.2 | XM_021846306.1 |
| XR_934771.2 | XR_002499749.1 |
| XR_934811.2 | XM_021854556.1 |
| XR_934874.3 | XM_021856228.1 |
| XR_934976.2 | XM_021854838.1 |
| XR_935089.2 | XM_001657773.2 |
| XR_935157.2 | XM_021839551.1 |
| XR_935171.2 | XM_021853851.1 |
| XR_935195.1 | XM_001647696.2 |
| XR_935200.1 | XM_001658854.2 |
| XR_935202.1 | XR_002503250.1 |
| XR_935325.1 | XM_021842320.1 |
| XR_935327.2 | XM_001653431.2 |
| XR_935378.3 | XM_001650951.2 |
| XR_935432.2 | XR_002498876.1 |
| XR_935456.2 | XM_001649950.2 |
| XR_935559.2 | XR_002499670.1 |
| XR_935599.2 | XR_002499634.1 |
| XR_935690.3 | XR_002502201.1 |
| XR_935712.2 | XM_001657878.2 |
| XR_935741.2 | XM_021842956.1 |
| XR_935812.3 | XR_002502878.1 |
| XR_935823.1 | XM_021857241.1 |
| XR_935866.2 | XM_001661702.2 |
| XR_935896.2 | XR_002499573.1 |
| XR_935942.2 | XR_002500743.1 |
| XR_935966.2 | XM_021857131.1 |
| XR_936006.2 | XM_021839658.1 |
| XR_936015.2 | XM_001662431.2 |
| XR_936052.2 | XR_002499387.1 |
| XR_936074.2 | XR_002500483.1 |
| XR_936091.2 | XR_002503213.1 |
| XR_936111.2 | XM_021857127.1 |
| XR_936137.3 | XR_002501873.1 |
| XR_936169.2 | XM_001649678.2 |
| XR_936174.1 | XR_002500368.1 |
| XR_936272.2 | XR_002498705.1 |
| XR_936283.2 | XR_002499964.1 |
| XR_936472.1 | XM_021852365.1 |
| XR_936554.2 | XM_001649308.2 |
| XR_936626.2 | XM_021846055.1 |
| XR_936728.2 | XM_001655942.2 |
| XR_936739.3 | XM_001657238.3 |
| XR_936750.3 | XR_002501658.1 |
| XR_936764.2 | XR_002502625.1 |

|             |                |
|-------------|----------------|
| XR_936847.2 | XR_002503152.1 |
| XR_936848.2 | XR_002498948.1 |
| XR_936896.2 | XR_002499884.1 |
| XR_936898.2 | XM_021838437.1 |
| XR_936911.2 | XR_002499711.1 |
| XR_936916.2 | XM_021844413.1 |
| XR_936962.1 | XR_002502385.1 |
| XR_936963.1 | XR_002501391.1 |
| XR_936968.2 | XM_021837443.1 |
| XR_936984.2 | XR_002503069.1 |
| XR_937057.1 | XR_002500908.1 |
| XR_937251.2 | XM_001660286.2 |
| XR_937263.2 | XM_001661470.2 |
| XR_937267.2 | XR_002499798.1 |
| XR_937268.2 | XR_002501435.1 |
| XR_937394.2 | XR_002502688.1 |
| XR_937396.2 | XR_002501566.1 |
| XR_937438.2 | XR_002503075.1 |
| XR_937606.3 | XM_001660459.2 |
| XR_937637.2 | XR_002502947.1 |
| XR_937688.3 | XM_001654154.2 |
| XR_937739.1 | XR_002502467.1 |
| XR_937748.3 | XR_002502295.1 |
| XR_937786.3 | XR_002501456.1 |
| XR_937811.2 | XR_002501377.1 |
| XR_937819.1 | XM_001650457.2 |
| XR_937827.3 | XM_001659009.2 |
| XR_937856.1 | XR_002500907.1 |
| XR_937863.2 | XR_002502879.1 |
| XR_937952.2 | XR_002502472.1 |
| XR_938055.2 | XR_002501734.1 |
| XR_938058.2 | XR_002502572.1 |
| XR_938072.2 | XR_002502427.1 |
| XR_938076.1 | XR_002498621.1 |
| XR_938086.2 | XM_011494699.2 |
| XR_938102.2 | XR_002500352.1 |
| XR_938131.2 | XR_002500054.1 |
| XR_938139.2 | XR_002500703.1 |
| XR_938171.2 | XM_001655456.2 |
| XR_938212.2 | XM_001652391.2 |
| XR_938226.2 | XM_021845976.1 |
| XR_938283.2 | XR_002498721.1 |
| XR_938289.2 | XM_021855248.1 |
| XR_938433.1 | XR_002502773.1 |
| XR_938507.2 | XR_002499490.1 |
| XR_938516.1 | XR_002501119.1 |
| XR_938534.1 | XR_002498795.1 |
| XR_938603.3 | XR_002501178.1 |
| XR_938641.2 | XM_021838628.1 |
| XR_938677.3 |                |

XR\_938679.1  
XR\_938701.3  
XR\_938753.2  
XR\_938771.1  
XR\_938780.3  
XR\_938796.3  
XR\_938854.1  
XR\_938919.2  
XR\_938920.2  
XR\_938931.2  
XR\_938935.2  
XR\_938957.3  
XR\_938977.2  
XR\_939091.2  
XR\_939185.2  
XR\_939242.2  
XR\_939498.2  
XR\_939522.2  
XR\_939620.2  
XR\_939722.2  
XR\_939785.2  
XR\_939834.1  
XR\_939844.2  
XR\_939854.2  
XR\_939873.2  
XR\_939886.2  
XR\_939974.2  
XR\_940002.3  
XR\_940019.2  
XR\_940067.2  
XR\_940083.1  
XR\_940093.1  
XR\_940111.2  
XR\_940183.3  
XR\_940187.3  
XR\_940205.2  
XR\_940228.2  
XR\_940235.2  
XR\_940260.1  
XR\_940281.2  
XR\_940317.2  
XR\_940392.3  
XR\_940455.2  
XR\_940541.3  
XR\_940586.1  
XR\_940609.2  
XR\_940700.3  
XR\_940733.1  
XR\_940782.3  
XR\_940846.2

XR\_940857.2  
XR\_940859.1  
XR\_940897.3  
XR\_940970.2  
XR\_940974.2  
XR\_940990.2  
XR\_940997.2  
XR\_941024.2  
XR\_941077.1  
XR\_941191.2  
XR\_941198.2  
XR\_941226.2  
XR\_941265.2  
XR\_941266.2  
XR\_941302.2  
XR\_941314.2  
XR\_941352.2  
XR\_941358.2  
XR\_941368.2  
XR\_941401.2  
XR\_941422.3  
XR\_941546.1  
XR\_941752.1  
XR\_941758.1  
XR\_941779.3  
XR\_941849.2  
XR\_941947.1  
XR\_941954.2  
XR\_941972.2  
XR\_942014.1  
XR\_942092.2  
XR\_942116.2  
XR\_942124.2  
XR\_942150.1  
XR\_942152.1  
XR\_942158.3  
XR\_942305.3  
XR\_942460.2  
XR\_942666.1  
XR\_942676.2  
XR\_942693.3  
XR\_942699.3  
XR\_942738.3  
XR\_942765.3  
XR\_942866.2  
XR\_942881.2  
XR\_942901.2  
XR\_942987.2  
XR\_943084.3  
XR\_943085.3



XR\_943136.2  
XR\_943176.1  
XR\_943270.2  
XR\_943413.3  
XR\_943577.1  
XR\_943586.2  
XR\_943610.2  
XR\_943636.2  
XR\_943640.2  
XR\_943701.2  
XR\_943705.2  
XR\_943724.2  
XR\_943736.2  
XR\_943771.2  
XR\_943864.3  
XR\_943908.2  
XR\_943932.2  
XR\_943953.2  
XR\_943955.3  
XR\_943977.2  
XR\_944008.2  
XR\_944013.3  
XR\_944089.2  
XR\_944155.2  
XR\_944157.1  
XR\_944172.1  
XR\_944174.2  
XR\_944187.3  
XR\_944190.2  
XR\_944191.2  
XR\_944321.3  
XR\_944329.3  
XR\_944386.2  
XR\_944428.3  
XR\_944432.2  
XR\_944515.2  
XR\_944537.2  
XR\_944581.2  
XR\_944864.2  
XR\_944868.2  
XR\_944901.2  
XR\_944904.2  
XR\_944974.2  
XR\_945015.2  
XR\_945054.2  
XR\_945057.2  
XR\_945081.2  
XR\_945188.1  
XR\_945238.2  
XR\_945280.2

XR\_945284.3  
XR\_945329.2  
XR\_945356.1  
XR\_945365.3  
XR\_945389.2  
XR\_945416.1  
XR\_945429.2  
XR\_945449.2  
XR\_945453.2  
XR\_945520.1  
XR\_945568.2  
XR\_945949.2  
XR\_945957.2  
XR\_945991.2  
XR\_946003.2  
XR\_946152.2  
XR\_946198.2  
XR\_946246.2  
XR\_946309.2  
XR\_946513.3  
XR\_946521.3  
XR\_946523.1  
XR\_946576.2  
XR\_946636.2  
XR\_946642.2  
XR\_946665.1  
XR\_946674.2  
XR\_946682.2  
XR\_946721.2  
XR\_946764.1  
XR\_946802.3  
XR\_946869.2  
XR\_946892.2  
XR\_946952.2  
XR\_947005.2  
XR\_947088.2  
XR\_947141.2  
XR\_947147.2  
XR\_947174.2  
XR\_947255.2  
XR\_947273.2  
XR\_947278.2  
XR\_947280.2  
XR\_947289.1  
XR\_947488.2  
XR\_947518.2  
XR\_947529.2  
XR\_947603.2  
XR\_947608.2  
XR\_947636.1

XR\_947682.2  
XR\_947727.1  
XR\_947807.1  
XR\_947834.2  
XR\_947851.2  
XR\_947940.2  
XR\_948008.2  
XR\_948039.1  
XR\_948057.2  
XR\_948092.3  
XR\_948352.2  
XR\_948410.2  
XR\_948435.2  
XR\_948528.2  
XR\_948533.2  
XR\_948540.2  
XR\_948581.2  
XR\_948623.2  
XR\_948664.2  
XR\_948692.2  
XR\_948899.3  
XR\_948944.3  
XR\_948956.2  
XR\_948958.3  
XR\_948965.1  
XR\_949045.1  
XR\_949163.3  
XR\_949201.3  
XR\_949269.2  
XR\_949286.2  
XR\_949402.3  
XR\_949563.2  
XR\_949584.2  
XR\_949692.2  
XR\_949693.2  
XR\_949694.3  
XR\_949705.1  
XR\_949706.2  
XR\_949933.3  
XR\_949950.2  
XR\_950008.3  
XR\_950143.2  
XR\_950215.2  
XR\_950235.2  
XR\_950265.2  
XR\_950334.1  
XR\_950580.1  
XR\_950632.1  
XR\_950638.2  
XR\_950767.3

XR\_950818.3  
XR\_950871.2  
XR\_950891.2  
XR\_950945.3  
XR\_951108.2  
XR\_951291.2  
XR\_951312.2  
XR\_951398.2  
XR\_951426.3  
XR\_951438.2  
XR\_951439.2  
XR\_951443.2  
XR\_951449.2  
XR\_951681.2  
XR\_951862.2  
XR\_951872.2  
XR\_951914.2  
XR\_951920.2  
XR\_951932.3  
XR\_951996.2  
XR\_952154.1  
XR\_952182.3  
XR\_952219.2  
XR\_952247.2  
XR\_952538.2  
XR\_952545.2  
XR\_952686.2  
XR\_952697.2  
XR\_952711.2  
XR\_952881.3  
XR\_952979.1  
XR\_953178.3  
XR\_953253.2
