# Supplementary material for: The dinucleotide composition of the Zika virus genome is shaped by conflicting evolutionary pressures in mammalian hosts and mosquito vectors
Source: PubMed Central journal article supplement (PMC8084339; doi:10.1371/journal.pbio.3001201), 2021-04-19
Supplement: pbio.3001201.s007.pdf [file pbio.3001201.s007.pdf]

>Wildtype

ACCGCCTGGGGGTGGGGGGAGGCTGGGGCCCTGATCACAGCCGCAACTTCCACTTTGTGGGAAGGCTCTCCGA  
ACAAGTACTGGAACCTCTACAGCCACTTCACTGTGTAACATTTTTAGGGGAAGTTACTTGGCTGGAGCTTC  
TCTAATCTACACAGTAACAAGAAACGCTGGCTTGGTCAAGAGACGTGGGGGTGGAACAGGAGAGACCCTGGGA  
GAGAAATGGAAGGCCCGCTTGAACCAGATGTCGGCCCTGGAGTTCTACTCCTACAAAAAGTCAGGCATCACCG  
AGGTGTGCAGAGAAGAGGCCCGCCGCGCCCTCAAGGACGGTGTGGCAACGGGAGGCCATGCTGTGTCCCAGG  
AAGTGCAAAGCTGAGATGGTTGGTGGAGCGGGGATACCTGCAGCCCTATGGAAAGGTCATTGATCTTGGATGT  
GGCAGAGGGGGCTGGAGTTACTACGCCGCCACCATCCGCAAAGTTCAAGAAGTGAAAGGATACACAAAAGGAG  
GCCCTGGTCATGAAGAACCCGTGTTGGTGC AAAGCTATGGGTGGAACATAGTCCGTCTTAAGAGTGGGGTGGA  
CGTCTTTCATATGGCGGCTGAGCCGTGTGACACGCTGCTGTGTGACATAGGTGAGTCATCATCTAGTCTGAA  
GTGGAAGAAGCACGGACGCTCAGAGTCCTCTCCATGGTGGGGATTGGCTTGAAAAAGACCAGGAGCCTTTT  
GTATAAAAGTGTTGTGCCATACACCAGCACTATGATGGAAACCTGGAGCGACTGCAGCGTAGGTATGGGGG  
AGGACTGGTCAGAGTGCCACTCTCCCGCAACTCTACACATGAGATGTACTGGGTCTCTGGAGCGAAAAGCAAC  
ACCATAAAAAGTGTGTCCACCACGAGCCAGCTCCTCTTGGGGCGCATGGACGGGCCCTAGAAGGCCAGTGAAAT  
ATGAGGAGGATGTGAATCTCGGCTCTGGCACGCGGGCTGTGGTAAGCTGCGCTGAAAGCTCCCAACATGAAGAT  
CATTGGTAACCGCATTGAAAAGGATCCGCAGTGAGCACGCGGAAACGTGGTTCTTTGACGAGAACCACCCATAT  
AGGACATGGGCTTACCATGGAAGCTATGAGGCCCCACACAAGGGTCAGCGTCTCTAATAAACGGGGTTG  
TCAGGCTCCTGTCAAACCCCTGGGATGTGGTGAAGTGGAGTCACAGGAATAGCCATGACCGACACCACCCGTA  
TGGTCAGCAAAGAGTTTTCAAGGAAAAGTGGACACTAGGGTGCCAGACCCCCAAGAAGGCACTCGTCAGGTT  
ATGAGCATGGTCTCTTCTGGTGTGGAAAGAGCTAGGCAAACACAAACGGCCACGAGTCTGTACCAAAGAAG  
AGTTCATCAACAAGGTTTCGTAGCAATGCAGCATTAGGGGCAATATTTGAAGAGGAAAAAGAGTGGAAGACTGC  
AGTGGAAGCTGTGAACGATCCAAGGTTCTGGGCTCTAGTGGACAAGGAAAGAGAGCACCACCTGAGAGGAGAG  
TGCCAGAGTTGTGTGTATAACATGATGGGAAAAGAGAAAAGAAACAAGGGGAATTTGGAAGGCCAAGGGCA  
GCCGCGCCATCTGGTATATGTGGCTAGGGGCTAGATTTCTAGAGTTCG

>SCR

ACCGCATGGGGATGGGGAGAGGCAGGGGCACTGATCACCGCCGCAACATCGACATTTGTGGGAAGGCTCCCCAA  
ACAAGTACTGGAACCTCCACCGCCACCTCCCTGTGTAACATCTTCAGAGGCAGCTACTTAGCTGGCGCATC  
TCTGATCTACACAGTGACCAGGAACGCCGTTTGGTTAAGAGGCGAGGGGGTGGAACTGGTGAAGTCTAGGA  
GAGAAGTGGAAAGGCTCGATTGAACCAGATGTCGGCCCTGGAGTTTTACTCGTACAAAAAGTCAGGTATCACAG  
AGGTTTGCAGAGAAGAGGCCGCTCGCGCCCTCAAGGACGGAGTAGCAACGGGTGGCCATGCAGTCTCGCGAGG  
TAGTGCAAACCTGAGATGGTTGGTGGAGCGGGGATATCTGCAGCCGTATGGCAAGGTAATTGATCTTGGGTGC  
GGCAGAGGGGGTTGGAGCTATTACGCTGCCACCATCCGCAAGGTGCAGGAAGTGAAGGGTTACACGAAAGGGG  
GCCCGGGGCATGAAGAACCTGTCTTAGTGCAAAGTTATGGATGGAACATAGTCCGTCTGAAGAGTGGGGTTGA  
TGTGTTTCATATGGCTGCTGAACCTGTGACACACTGCTCTGTGACATTGGAGAGTCGTCTCCAGCCCAGAA  
GTAGAGGAAGCCCGCACCCCTCAGAGTGCTTTCCATGGTGGGGGACTGGCTAGAGAAAAGACCAGGAGCATCT  
GTATCAAAGTGTTGTGCCCTTACACCAGCACTATGATGGAGACACTGGAGCGGCTTCAGCGGAGATATGGAGG  
GGGTCTGGTCAGAGTGCCCTCTCTCCCGAACTCAACTCATGAGATGTACTGGGTGTCAGGTGCCAAGAGCAAC  
ACCATAAAGAGTGTCTCAACGACCAGTCAGCTCCTCTTGGGACGAATGGATGGACCAAGGAGGCCAGTGAAGT  
ACGAGGAAGATGTAAACCTGGGCTCAGGCACCCGTGCTGTTGTAAGCTGCGCTGAAGCCCCAACATGAAGAT  
CATTGGCAACCGCATTGAAAAGATTTCGCAGTGAGCACGCAGAACTTGGTTCTTCGACGAGAATCACCCCTAT  
AGAACATGGGCTTACCATGGAAGCTATGAGGCCCCACACAAGGCTCAGCCTCATCTCTGATCAACGGAGTTG  
TCAGACTCCTGTCAAAGCCTTGGGATGTGGTGAAGGAGTGCAGGAATTGCCATGACTGACACCACCCCTA  
TGGACAGCAGAGGGTGTTC AAGGAAAAGTGGACACAAGGGTCCCGGACCCCAAGAGGGGAACACGCCAAGTC  
ATGAGTATGGTGTCTTCTGGTGTGGAAAGAGCTTGGCAAGCACAACGGCCTCGAGTTTGTACCAAAGAAG  
AGTTCATTAACAAGGTGCGAAGCAATGCAGCATTAGGGGCAATTTTTGAAGAGGAAAAAGAGTGGAACCGGC  
AGTGGAAGCTGTAAACGATCCAAGATTCTGGGCGCTGGTGGACAAGGAAAGAGAGCATCTGAGAGGAGAG  
TGCCAGAGTTGTGTTTATAACATGATGGGCAAAGGGAGAAAAGCAAGGAGAATTTGGAAGGCCAAGGGCA  
GCCGAGCCATCTGGTATATGTGGCTAGGGGCAAGATTCTAGAGTTCG

>UpA\_max TpA^Target\_ratio=2.500^

ACCGCCTGGGGGTGGGGGGAGGCTGGGGCCCTAATAACAGCCGCTACTTCTACTTTATGGGAAGGCTCTCCGA  
ATAAGTACTGGAACCTCTACAGCTACTTCACTATGTAATATATTTAGGGGTAGTTACTTAGCTGGAGCTTC  
TCTAATATATACAGTAACTAGAAACGCTGGCTTAGTTAAGAGACGTGGGGGTGGTACAGGAGAGACCCTAGGA  
GAGAAATGGAAGGCCCGCTTAAACCAGATGTCGGCCCTAGAGTTCTACTCCTATAAAAAAGTCAGGTATTACCG  
AGGTATGTAGAGAAGAGGCCCGCCGCGCCCTTAAGGACGGTGTAGCTACGGGAGGCCATGCTGTATCCCAGG  
TAGTGCTAAGCTTAGATGGTTAGTAGAGCGGGGATACCTACAGCCCTATGGTAAGGTTATAGATCTAGGATGT  
GGTAGAGGGGGCTGGAGTTACTACGCCGCTACTATACGTAAGTACAAGAAGTTAAAGGATATACTAAAGGAG

GCCCTGGTCATGAAGAACCCGTATTAGTACAAAGCTATGGGTGGAATATAGTACGTCTTAAGAGTGGGGTAGA  
CGTATTTTCATATGGCGGCTGAGCCGTGTGATACGCTACTATGTGATATAGGTGAGTCATCATCTAGTCCTGAA  
GTAGAAGAAGCAGTACGCTTAGAGTACTATCTATGGTAGGGGATTGGCTAGAAAAAGACCAGGAGCCTTTT  
GTATAAAAGTATTATGCCCATATACTAGTACTATGATGGAAACCCTAGAGCGACTACAGCGTAGGTATGGGG  
AGGACTAGTAAGAGTACCACTATCCCGTAACTCTACACATGAGATGTACTGGGTATCTGGAGCGAAAAGTAAT  
ACTATAAAAAGTGTATCTACTACGAGCCAGCTACTATTAGGGCGTATGGACGGGCCCTAGAAGGCCAGTTAAAT  
ATGAGGAGGATGTAAATCTCGGCTCTGGTACGCGGGCTGTAGTAAGCTGCGCTGAAGCTCCTAATATGAAGAT  
AATAGGTAACCGTATAGAAAGGATACGTAGTGAGCACGCGGAAACGTGGTTCTTTGACGAGAACCACCCATAT  
AGGACATGGGCTTACCATGGTAGCTATGAGGCCCTACACAAGGGTCAGCGTCTCTCTAATAAACGGGGTAG  
TAAGGCTACTATCTAAACCTGGGATGTAGTTACTGGAGTAACAGGTATAGCTATGACCGATACTACACCGTA  
TGGTCAGCAAAGAGTATTTAAGGAAAAAGTAGATACTAGGGTACCAGACCCCCAAGAAGGTACTCGTCAGGTT  
ATGAGTATGGTATCTTCTGGTTATGGAAAGAGCTAGGTAAACATAAACCGCCACGAGTATGTACTAAAGAAG  
AGTTTATTAATAAGGTACGTAGTAATGCAGCATTAGGGGCTATATTTGAAGAGGAAAAAGAGTGGAAGACTGC  
AGTAGAAGCTGTAAACGATCCTAGGTTCTGGGCTCTAGTAGATAAGGAAAGAGAGCACCACCTTAGAGGAGAG  
TGCCAGAGTTGTGTATATAATATGATGGGTAAAAGAGAAAAGAAACAAGGGGAATTTGGTAAGGCTAAGGGTA  
GCCGCGCTATATGGTATATGTGGCTAGGGGCTAGATTTCTAGAGTTTCG

>CpG\_max hi CpG^Target\_ratio=2.500^  
ACCGCTGGGGTGGGGCGAGGCCGGCGCGCTGATCACCGCCGCGACGTTCGACGTTGTGGGAAGGCTCGCCGA  
ACAAGTACTGGAACCTCGTCTACCGCGACGTTCGCTGTGTAACATTTTTAGGGGAAGTTACTTGGCCGGCGCGTC  
GCTAATCTACACGGTAACCGGAAACGCCGGCTTGGTCAAGCGACGCGGGCGGGAACCGGCGAGACGCTCGGC  
GAGAAATGGAAGGCGCGCTTGAACCAGATGTTCGGCGCTCGAGTTCTACTCGTACAAAAAGTCGGGCATCACCG  
AGGTGTGCCGGAAGAGGGCGCGCCGCGCGCTCAAGGACGGCGTTCGCGACGGGCGGCCACGCGGTGTTCGCGCGG  
AAGCGCAAGCTGCGATGGTTGGTTCGAGCGCGGATACCTGCAGCCGTACGGAAAGGTCATCGATCTCGGATGC  
GGCCGCGGGCGCTGGAGTTACTACGCCGCGACGATCCGCAAAGTTCAAGAAGTGAAAGGATACACGAAAGGCG  
GCCCCGTCACGAAGAACCCGTGTTGGTGAAAGCTACGGGTGGAACATAGTCCGTCTTAAGAGCGGGCGTTCGA  
CGTCTTTTCATATGGCGGGGAGCCGTGCGACACGCTGCTGTGCGACATAGGCGAGTCGTCTGTCTAGTCCGGAA  
GTGCAAGAAGCGCGGACGCTCCGCGTCTCTCGATGGTTCGGCGATTGGCTCGAAAAACGACCGGGCGCGTTTT  
GTATAAAAGTGTGTGCCGTACACGAGCACTATGATGGAAACGCTCGAGCGCTGCAGCGTAGGTACGGCGG  
CGGACTCGTCCGCGTGCCTCTCGCGCAACTCTACGCACGAGATGTACTGGGTCTCCGGCGCGAAAAGCAAC  
ACGATAAAAAGCGTGTTCGACGACGAGCCAGCTCCTCTTGGGGCGCATGGACGGGCCCTAGACGGCCGGTGAAT  
ACGAGGAGGACGTGAATCTCGGCTCCGGCACGCGCGCCGTCGTAAGCTGCGCCGAAGCGCCGAACATGAAGAT  
CATCGGTAACCGCATCGAACGAATCCGCAGCGAGCACGCGGAAACGTGGTTCTTCGACGAGAACCACCCGTAT  
AGGACGTGGGCGTACCACGGAAGCTACGAGGCGCCGACGCAAGGGTCCGCGTTCGTCGTAATAAACGGCGTTCG  
TCCGGTCTGTTCGAAACCGTGGGACGTCTGACCGGCGTACCAGGAAATAGCGATGACCGACACGACGCCGTA  
CGGTACAGCAACGCGTTTTCAAGGAAAAAGTCGACACTAGGGTGCCGGACCCGCAAGAAGGCACGCGTCAGGTT  
ATGAGCATGGTCTCGTTCGTTGTGGAAAGAGCTAGGCAAACACAAACGGCCGCGCTCTGTACGAAAGAAG  
AGTTCATCAACAAGGTTTCGTAGCAACGCGGCGTTAGGCGCGATATTCGAGGAGGAAAAAGAGTGGAAGACCGC  
CGTCGAAGCCGTGAACGATCCGCGGTTCTGGGCGCTAGTCGACAAGGAACGCGAGCACCACCTGCGCGGCGAG  
TGCCAGAGTTGCGTGTATAACATGATGGGAAAACGCGAAAAGAAACAAGGGCAATTCGGAAAGGCGAAGGGCA  
GCCGCGCATCTGGTATATGTGGCTAGGCGCTAGATTTCTAGAGTTTCG

>CpG\_1.0 CpG^Target\_ratio=1.000^  
ACCGCTGGGGTGGGGTGGAGCTGGAGCACTCATCACCGCCGAACGTTCGACGTTGTGGGAAGGCTCGCCGA  
ACAAGTACTGGAACCTCGTCTACGGCCACGTCACTGTGTAACATTTTTAGGGGAAGTTACTTGGCGGGAGCTTC  
GCTAATCTACACGGTAACACGAAACGCGGGCTTGGTCAAGAGAAGGGGCGGTGGAACAGGAGAGACTCTGGGT  
GAGAAATGGAAGGCGAGATTGAACCAGATGTCCGCGCTCGAGTTCTACTCCTACAAAAAGTCCGGCATCACGG  
AGGTGTGCAGAGAAGAGGCGCTCGCGCTCTAAAGGACGTTGTCGCAACTGGAGGCCATGCTGTGTTCGCGCGG  
AAGTGCAAAGCTGAGATGGTTGGTTGAGCGAGGATACTGCAGCCGTATGGAAAGGTCATTGATCTTGGATGT  
GGCAGAGGTGGCTGGAGTTATTATGCCGCAACGATCCGCAAAGTTCAAGAAGTGAAAGGATACACAAAAGGAG  
GACCGGTCATGAAGAACCAGTTTTTGGTGAAAGCTACGGGTGGAACATAGTACGTCTTAAGAGTGGGGTAGA  
CGTCTTTTCATATGGCTGCCGAGCCGTGTGACACCCTCCTTTGCGACATCGGTGAGTCGTCTCATCTAGTCCTGAA  
GTCGAAGAAGCACGGACTCTCCGCGTCTCTCGATGGTGGGGGATTGGCTTGA AAAAAGACCAGGGCGCCTTCT  
GTATAAAAGTGTGTGCCCATACACCAGCACTATGATGGAAACTCTCGAGAGACTGCAGCGTAGGTATGGCGG  
CGGACTCGTCAGAGTGCCACTCTCTCGAAACTCTACACATGAGATGTACTGGGTGTCTGGAGCGAAAAGCAAC  
ACGATAAAAAGTGTTCACGACAAGCCAGCTCCTATTGGGGAGGATGGATGGTCCTAGAAGGCCAGTGAAAT  
ATGAGGAGGATGTAAATCTCGGCTCTGGGACTCGAGCCGTGGTAAGCTGCGCTGAAGCGCCGAACATGAAGAT  
CATTGGTAACCGCATTGAACGAATCCGCAGCGAGCACGCTGAAACATGGTTCTTTGACGAGAACCACCCCTAT

AGGACATGGGCGTACCATGGAAGCTATGAGGCGCCGACACAAGGTTCTGCGTCCTCTCTAATAAACGGGGTCG  
TCCGACTCCTGTCAAACCCCTGGGATGTGGTGACGGGGGTACGGGAATAGCGATGACGGACACCACACCATA  
CGGTCAGCAACGAGTTTTCAAGGAAAAAGTCGACACTCGCGTGCCAGACCCGCAAGAAGGCACTCGTCAGGTT  
ATGAGCATGGTCTCGTCGTGGTTGTGGAAAGAAGTAGGCAAACACAAAAGACCACGAGTCTGTACGAAAGAAG  
AGTTCATCAACAAGGTTAGAAGCAACGCCGCATTAGGCGCAATATTTGAAGAGGAAAAAGAGTGGAAGACTGC  
CGTGGAAGCTGTGAACGATCCACGGTTCTGGGCTCTCGTCGACAAGGAAAGAGAGCATCACCTCAGAGGAGAG  
TGCCAGAGTTGTGTGTATAACATGATGGGAAAAAGAGAAAAGAAACAAGGCGAATTTGGAAAGGCCAAGGGCA  
GCCGCGGATCTGGTATATGTGGCTCGGCGCGGATTTCTAGAGTTCG
